# Supplementary material
Source: PubMed Central journal article supplement (PMC3384769)
Supplement: NIHMS382303-supplement-1_si_001.pdf [file NIHMS382303-supplement-1_si_001.pdf]

# Supporting Information

Contribution from College of Materials Science and Opto-electronic Technology,  
Graduate University of Chinese Academy of Sciences,  
19A Yuquanlu, Beijing, China 100049  
and The Department of Chemistry and Biochemistry,  
University of Notre Dame, Notre Dame, Indiana 46556,

## Structural Insights into Ligand Dynamics: Correlated Oxygen and Picket Motion in Oxycobalt Picket Fence Porphyrins

Jianfeng Li,<sup>†,‡</sup> Bruce C. Noll,<sup>‡</sup> Allen G. Oliver,<sup>‡</sup> and W. Robert Scheidt<sup>\*‡</sup>

May 28, 2012

---

<sup>†</sup>Graduate University of Chinese Academy of Sciences

<sup>‡</sup>University of Notre Dame

<sup>\*</sup>To whom correspondence should be addressed: E-mail Scheidt.1@nd.edu, Fax (574) 631-6652

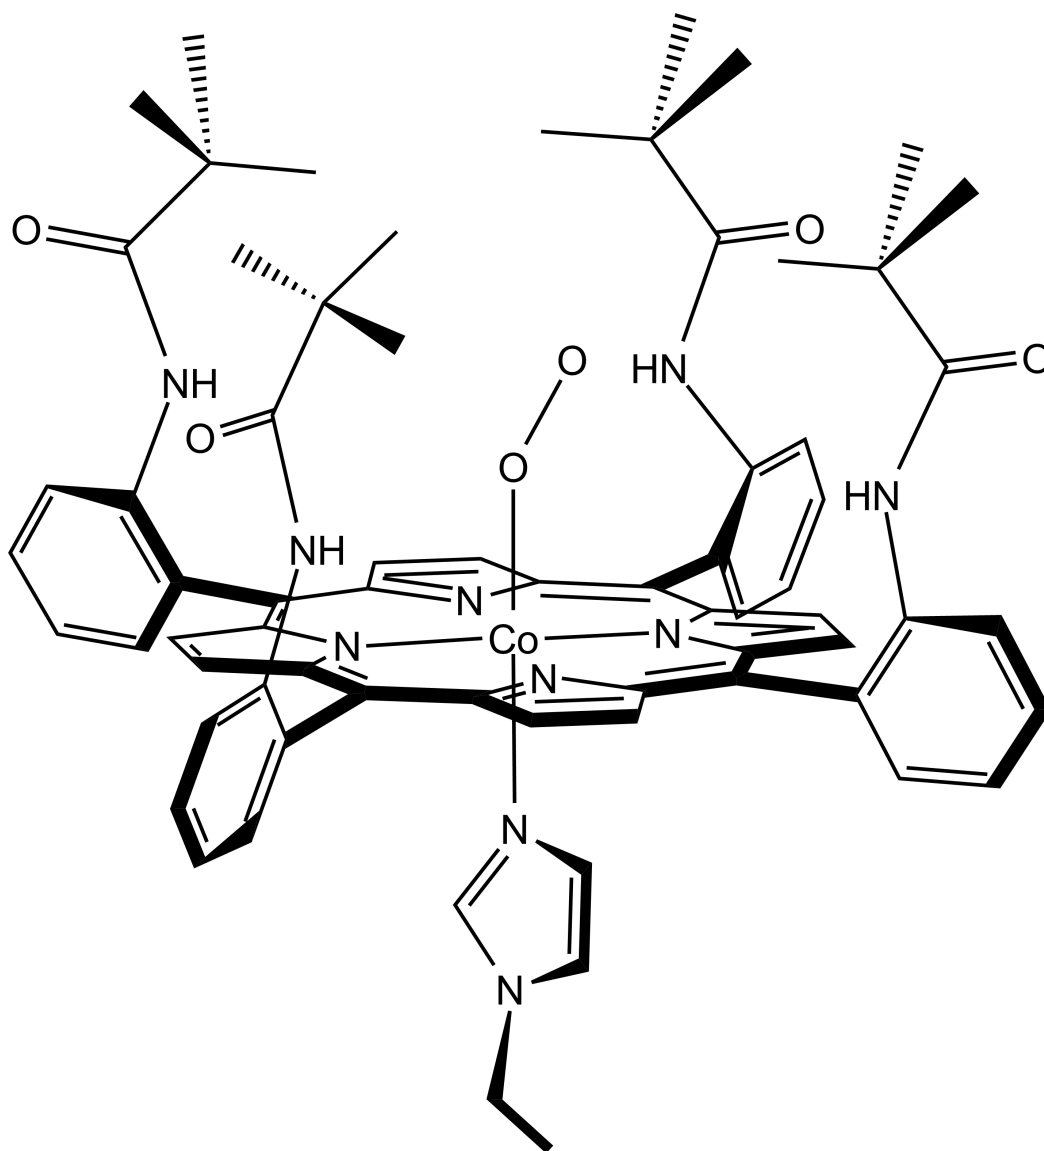

**Figure S1.** A line drawing depiction of [Co(TpivPP)(1-EtIm)(O<sub>2</sub>)].

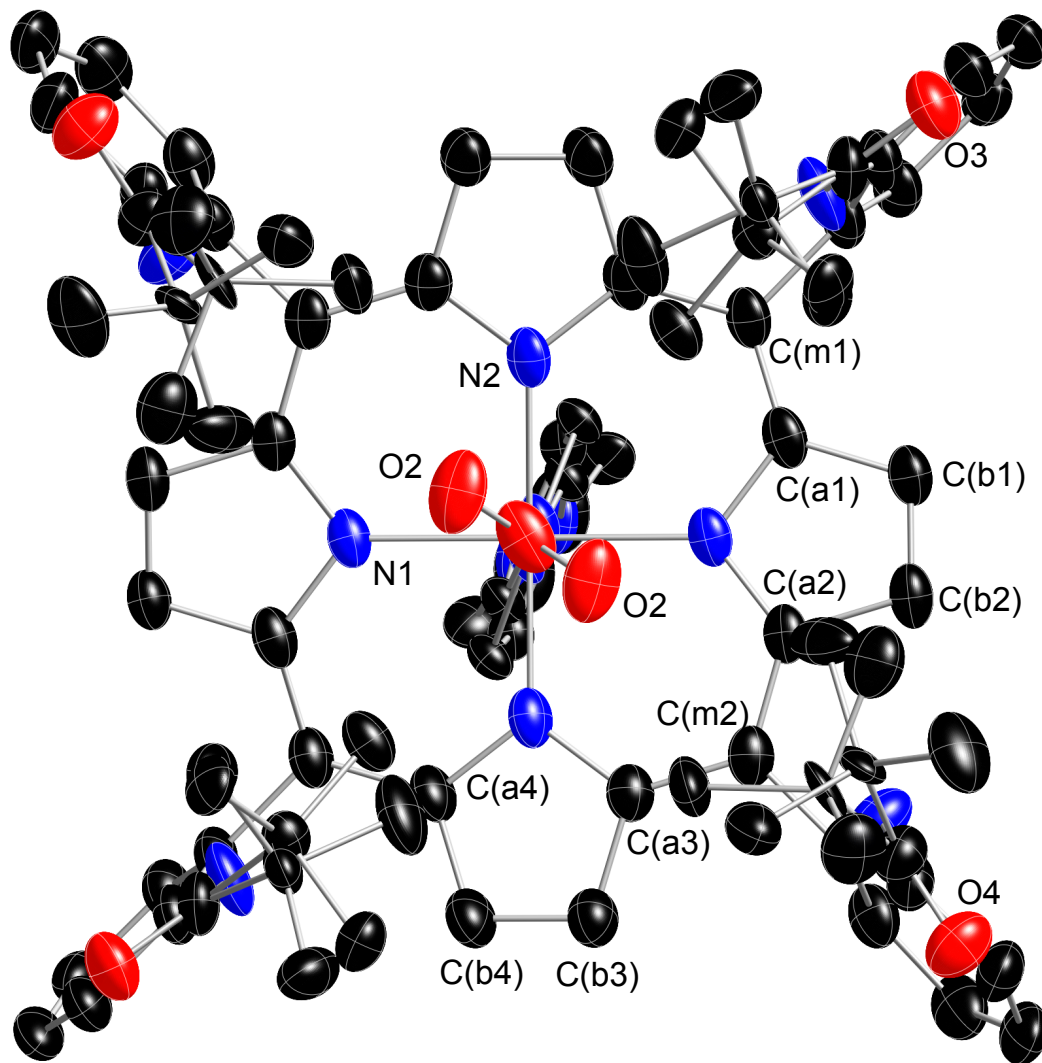

**Figure S2.** Top down view of the thermal ellipsoid plot for  $[\text{Co}(\text{TpivPP})(1\text{-EtIm})(\text{O}_2)]$  ( $C2/c$  form, 100 K) displaying the atom labelingscheme. Thermal ellipsoids of all atoms are contoured at the 50% probability level. The crystallographically required twofold axis is perpendicular to the plane of the paper. Hydrogen atoms have been omitted for clarity. Nonbonded contacts to the alternate picket closest contacts:  $\text{O}2 \cdots \text{C}27 = 3.26 \text{ \AA}$ ,  $\text{O}2 \cdots \text{C}27b = 4.02 \text{ \AA}$ ,  $\text{O}2 \cdots \text{C}25 = 4.441 \text{ \AA}$ ,  $\text{O}2 \cdots \text{C}25b = 3.33 \text{ \AA}$ .

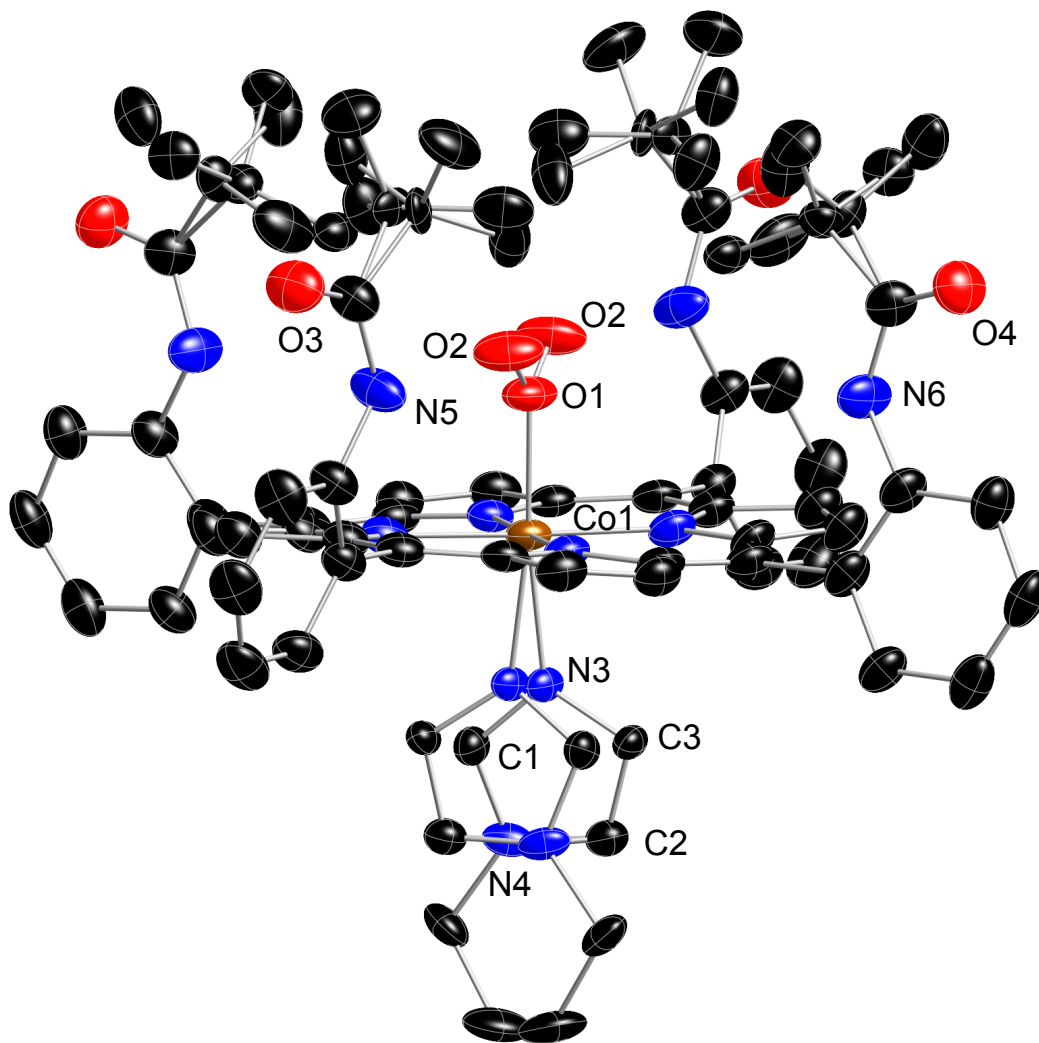

**Figure S3.** Edge-on thermal ellipsoid plot of [Co(TpivPP)(1-EtIm)(O<sub>2</sub>)] (*C2/c* form, 100 K) displaying the atom labeling scheme. Thermal ellipsoids of all atoms are contoured at the 50% probability level. Hydrogen atoms have been omitted for clarity.



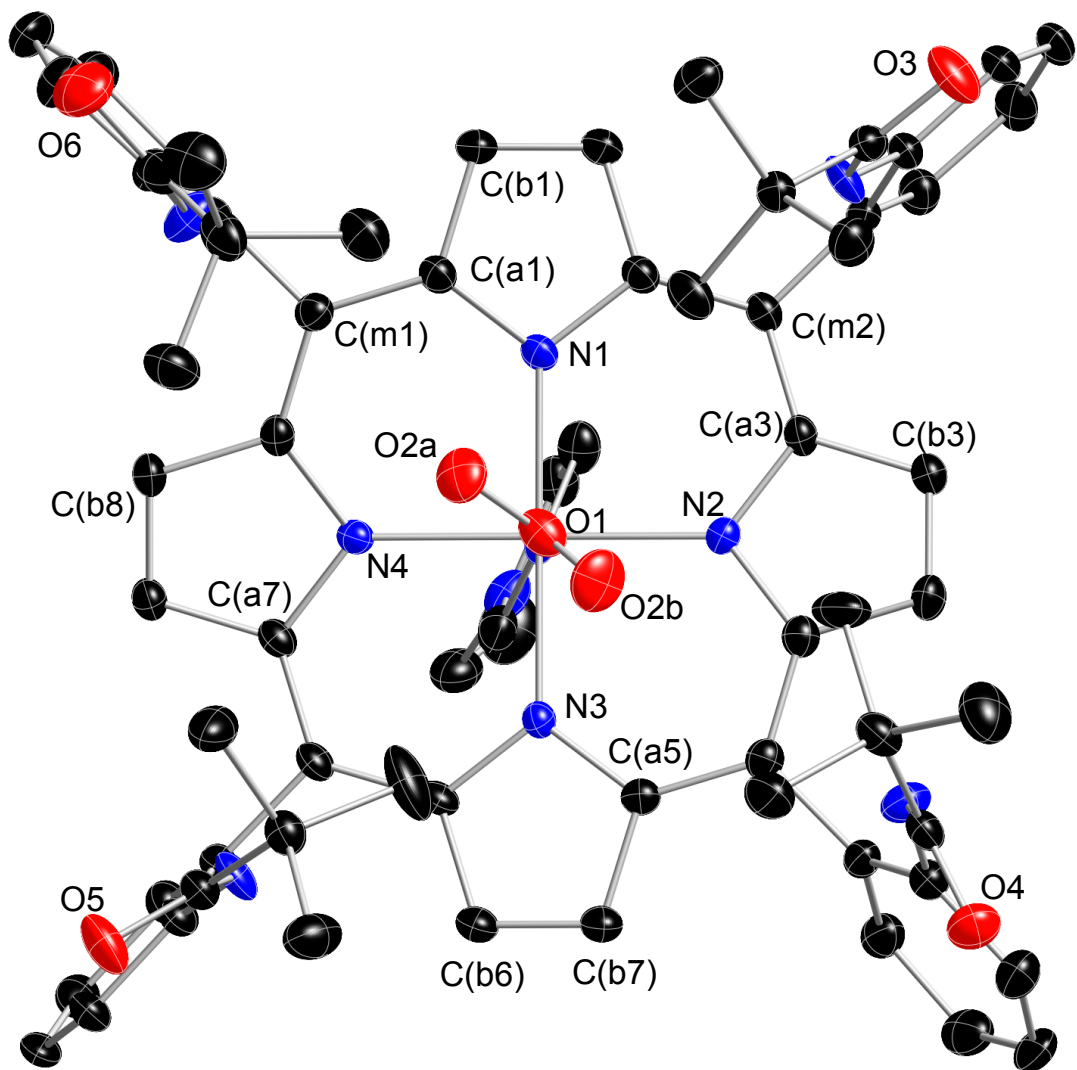

**Figure S4.** Top down view of the thermal ellipsoid plot of  $[\text{Co}(\text{TpivPP})(1\text{-EtIm})(\text{O}_2)]$  ( $P\bar{1}$  form, 100 K) displaying the atom labeling scheme. Thermal ellipsoids of all atoms are contoured at the 50% probability level. Hydrogen atoms have been omitted for clarity. Nonbonded contacts to the closest picket contacts:  $\text{O2a} \cdots \text{C38} = 3.34 \text{ \AA}$ ,  $\text{O2a} \cdots \text{C39} = 4.03 \text{ \AA}$ ,  $\text{O2b} \cdots \text{C49} = 3.21 \text{ \AA}$ ,  $\text{O2b} \cdots \text{C47} = 4.33 \text{ \AA}$ .

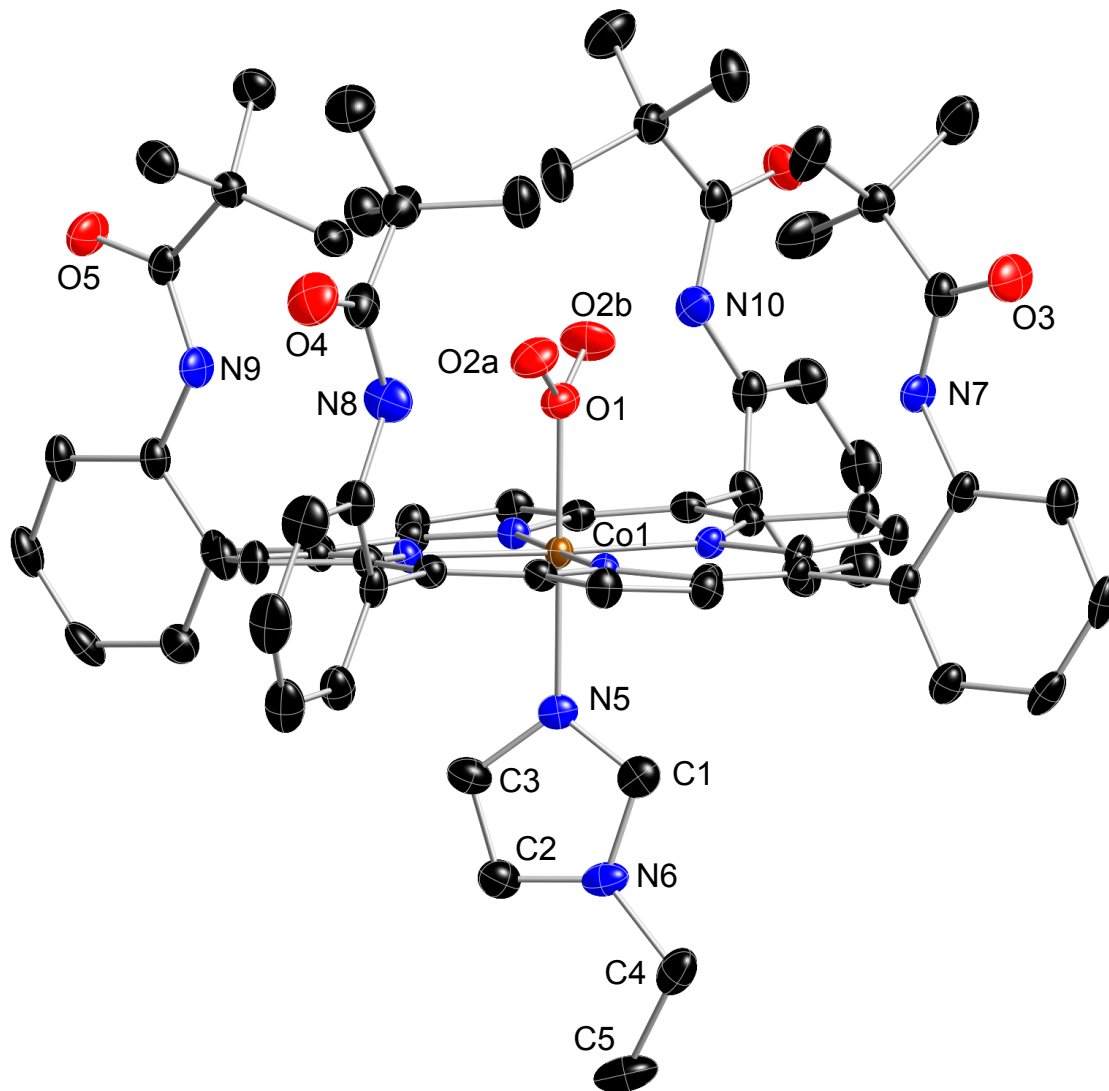

**Figure S5.** Edge-on thermal ellipsoid plot of  $[\text{Co}(\text{TpivPP})(1\text{-EtIm})(\text{O}_2)]$  ( $P\bar{1}$  form, 100 K) displaying the atom labeling scheme. Thermal ellipsoids of all atoms are contoured at the 50% probability level. Hydrogen atoms have been omitted for clarity. O Distances to possible H-donors:  $\text{O2a} \cdots \text{HN8} = 3.19 \text{ \AA}$ ,  $\text{O2a} \cdots \text{N8} = 4.05 \text{ \AA}$ ,  $\text{O1} \cdots \text{HN8} = 4.26 \text{ \AA}$ .

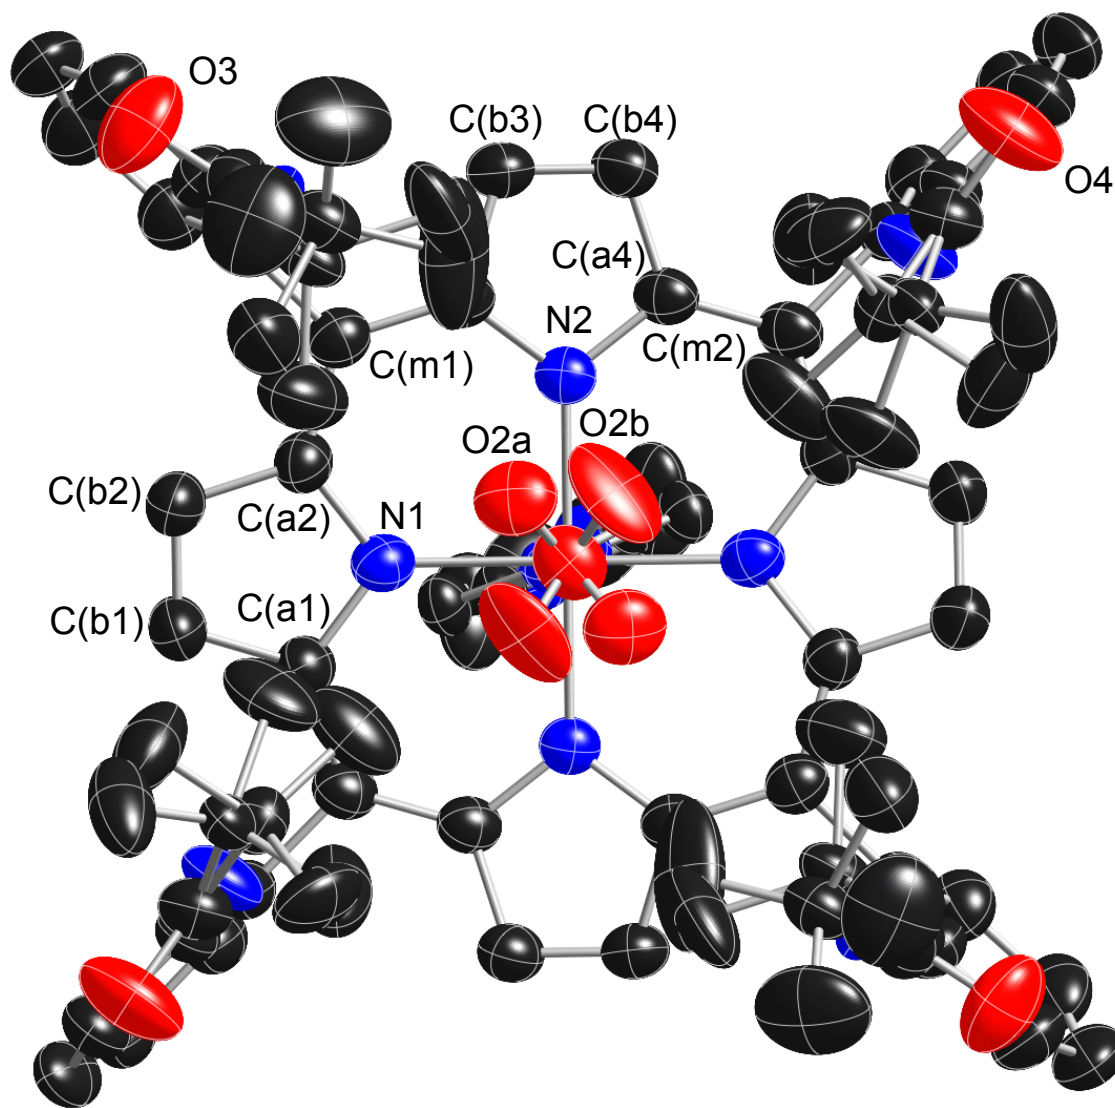

**Figure S6.** Top down view of the thermal ellipsoid plot of  $[\text{Co}(\text{TpivPP})(1\text{-EtIm})(\text{O}_2)]$  ( $C2/c$  form, 200 K) displaying the atom labeling scheme. Thermal ellipsoids of all atoms are contoured at the 50% probability level. Populations:  $\text{O2a} = 0.412(11)$ ,  $\text{O2b} = 0.088(11)$ . Hydrogen atoms have been omitted for clarity. Nonbonded contacts to the alternate picket closest contacts:  $\text{O2a} \cdots \text{C26a} = 3.31 \text{ \AA}$ ,  $\text{O2a} \cdots \text{C26b} = 4.31 \text{ \AA}$ ,  $\text{O2a} \cdots \text{C25a} = 3.86 \text{ \AA}$ ,  $\text{O2a} \cdots \text{C25b} = 3.25 \text{ \AA}$ , two  $< o$  conformations;  $\text{O2b} \cdots \text{C23a} = 2.50 \text{ \AA}$ ,  $\text{O2b} \cdots \text{C23b} = 3.14 \text{ \AA}$ ,  $\text{O2b} \cdots \text{C22b} = 4.26 \text{ \AA}$ , one  $< o$  conformations and one  $>$  conformation.

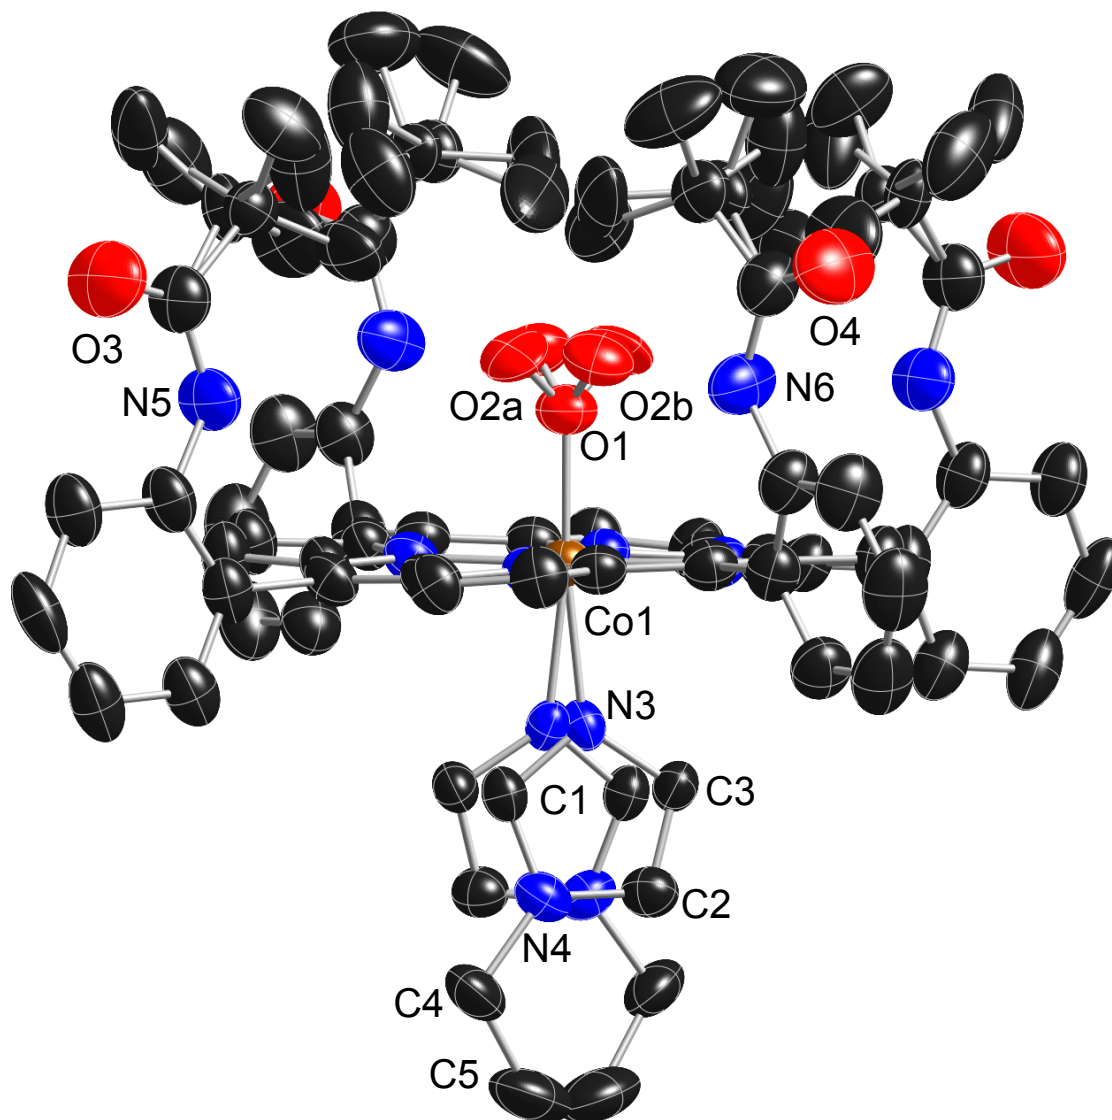

**Figure S7.** Edge-on thermal ellipsoid plot of [Co(TpivPP)(1-EtIm)(O<sub>2</sub>)] (*C*2/*c* form, 200 K) displaying the atom labeling scheme. Thermal ellipsoids of all atoms are contoured at the 50% probability level. Hydrogen atoms have been omitted for clarity.

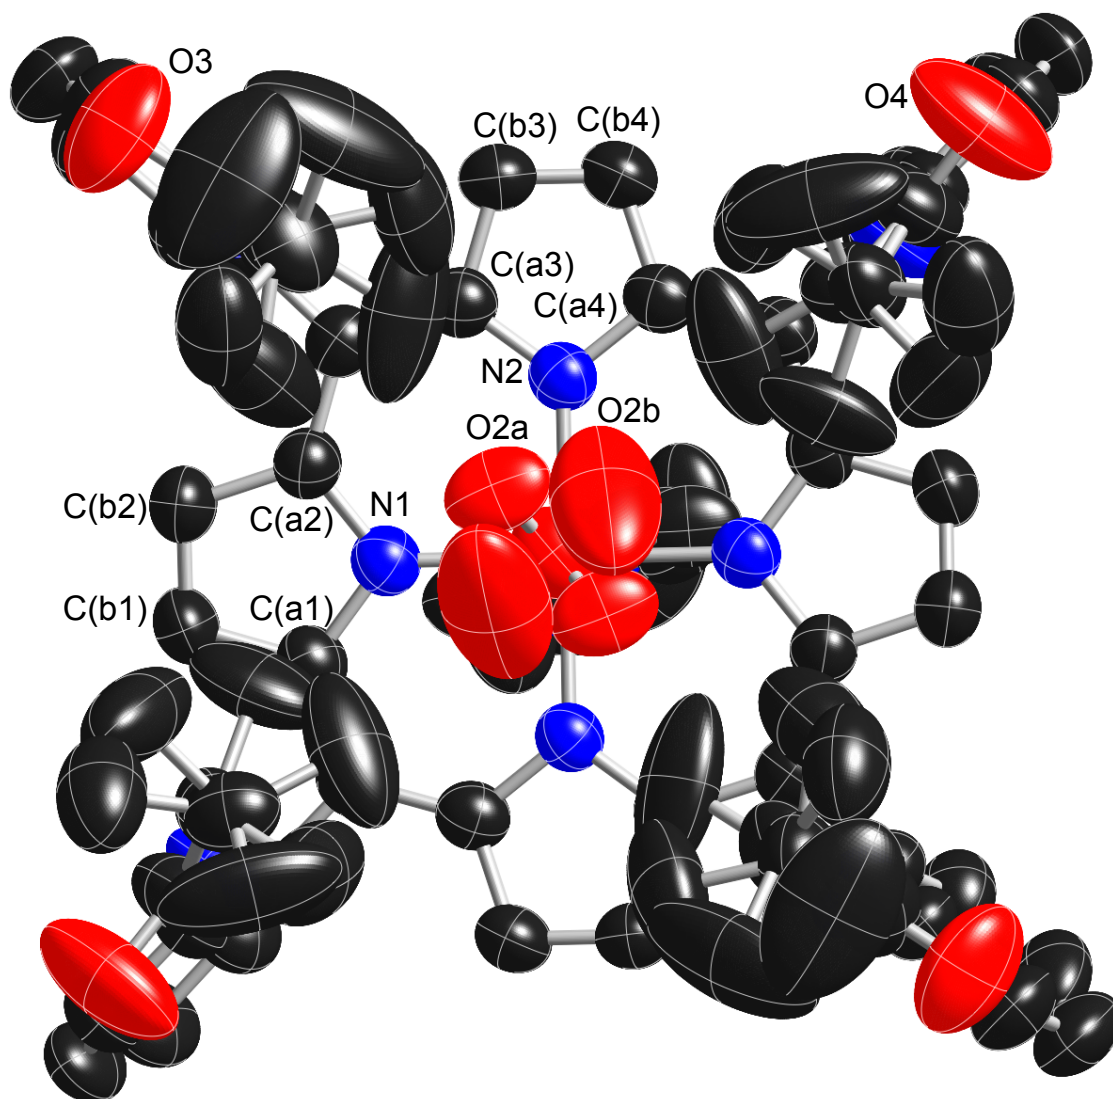

**Figure S8.** Top view thermal ellipsoid plot of  $[\text{Co}(\text{TpivPP})(1\text{-EtIm})(\text{O}_2)]$  ( $C2/c$  form, 300 K) displaying the atom labeling scheme. Thermal ellipsoids of all atoms are contoured at the 50% probability level. Populations:  $\text{O}2\text{a} = 0.271$  (15),  $\text{O}2\text{b} = 0.229$  (15). Hydrogen atoms have been omitted for clarity. Nonbonded contacts to the alternate picket closest contacts:  $\text{O}2\text{a} \cdots \text{C}22 = 2.70 \text{ \AA}$ ,  $\text{O}2\text{a} \cdots \text{C}23\text{b} = 3.58 \text{ \AA}$ ,  $\text{O}2\text{a} \cdots \text{C}22\text{b} = 3.78 \text{ \AA}$ ,  $\text{O}2\text{a} \cdots \text{C}23 = 4.62 \text{ \AA}$ ,  $\text{O}2\text{b} \cdots \text{C}27\text{b} = 2.59 \text{ \AA}$ ,  $\text{O}2\text{b} \cdots \text{C}27 = 2.98 \text{ \AA}$ ,  $\text{O}2\text{b} \cdots \text{C}26 = 4.29 \text{ \AA}$ ,  $\text{O}2\text{b} \cdots \text{C}26\text{b} = 5.02 \text{ \AA}$ .

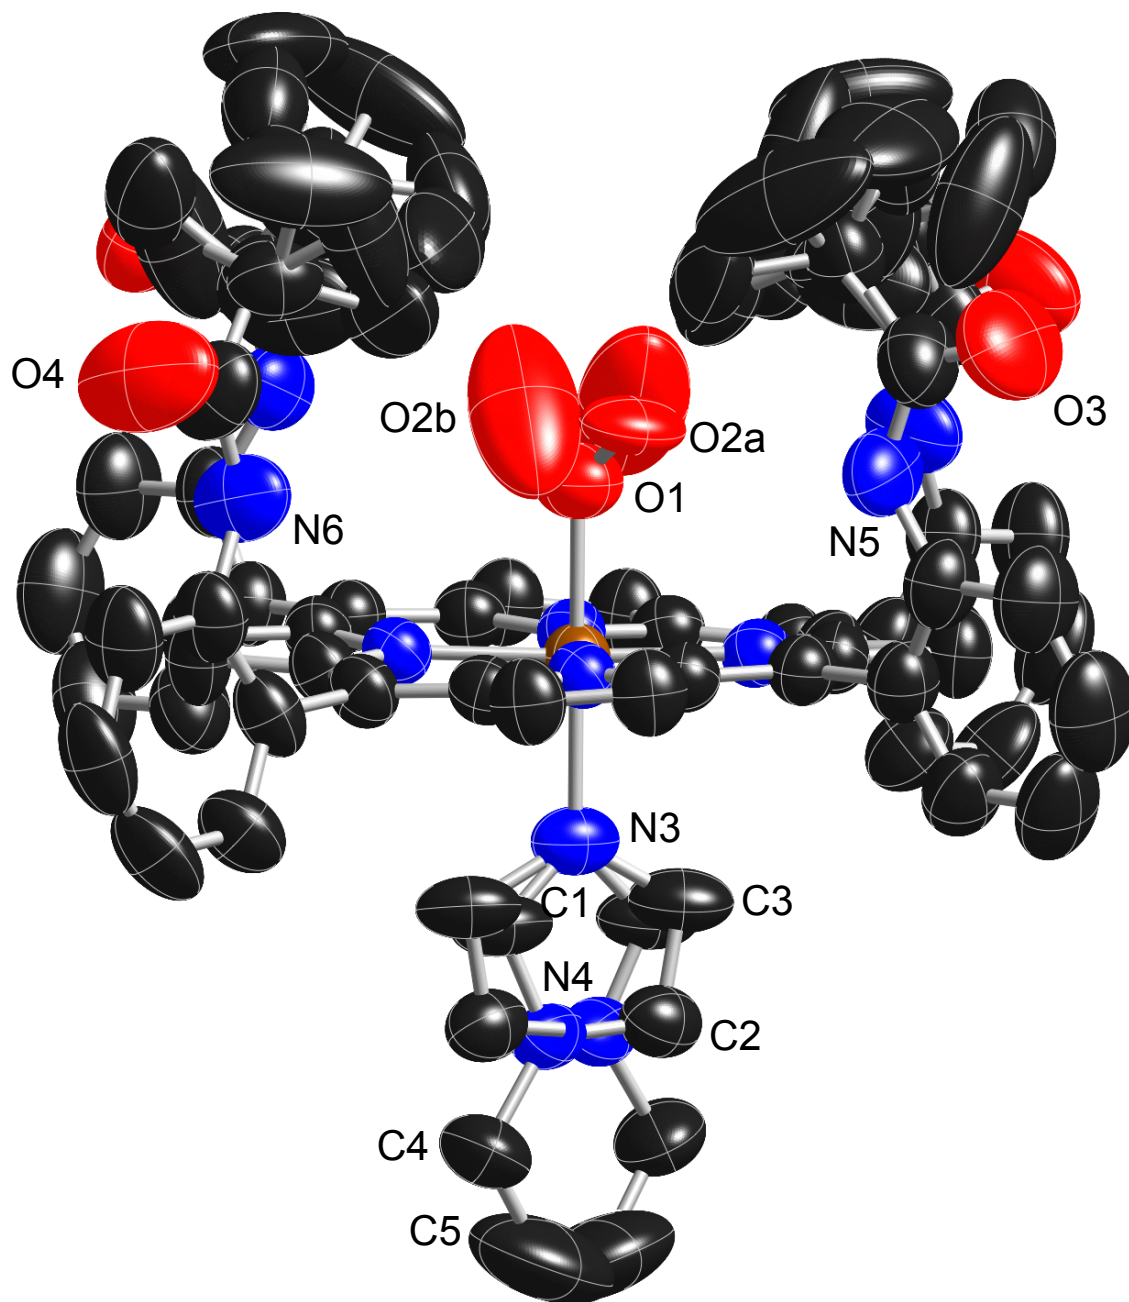

**Figure S9.** Edge-on thermal ellipsoid plot of  $[\text{Co}(\text{TpivPP})(1\text{-EtIm})(\text{O}_2)]$  ( $C2/c$  form, 300 K) displaying the atom labeling scheme. Thermal ellipsoids of all atoms are contoured at the 50% probability level. Hydrogen atoms have been omitted for clarity.

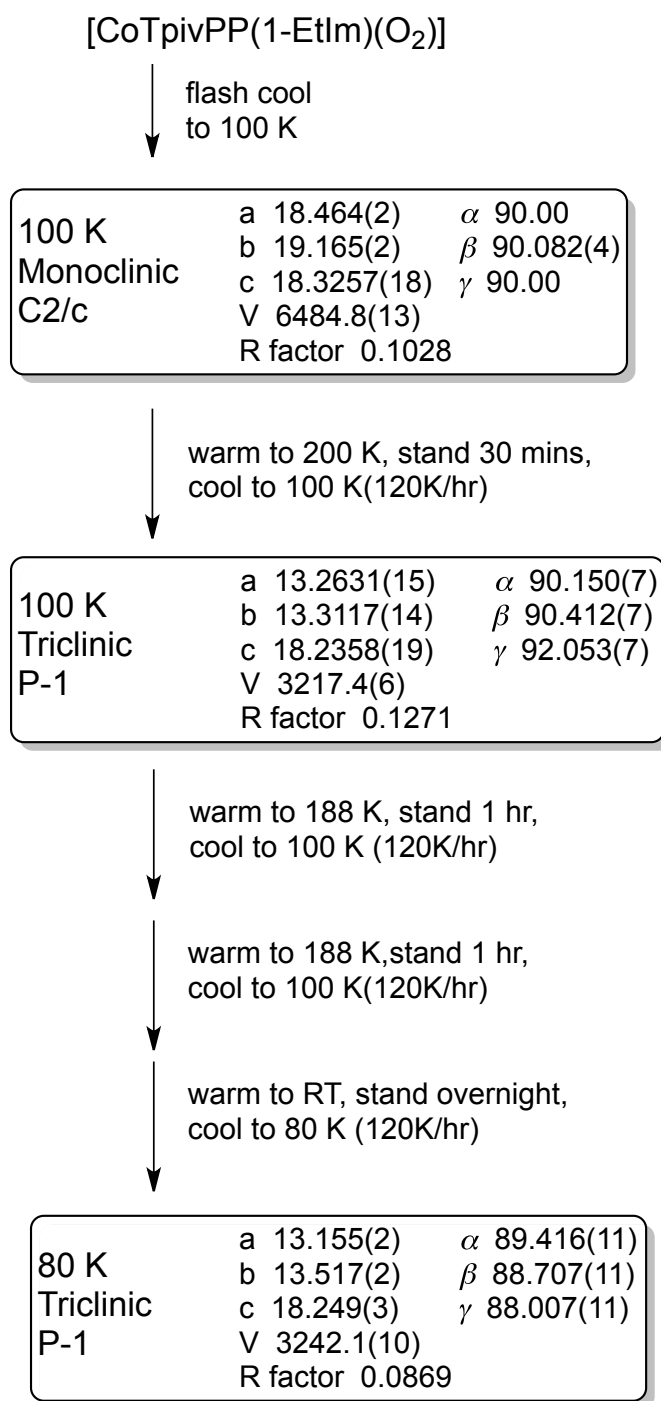

**Figure S10.** Scheme showing the temperature-dependent behavior of a second [Co(TpivPP)(1-EtIm)(O<sub>2</sub>)] crystal. The annealing experiments are described. The temperature, corresponding space group, unit cell parameters, and observed R factor are given in the highlighted boxes.



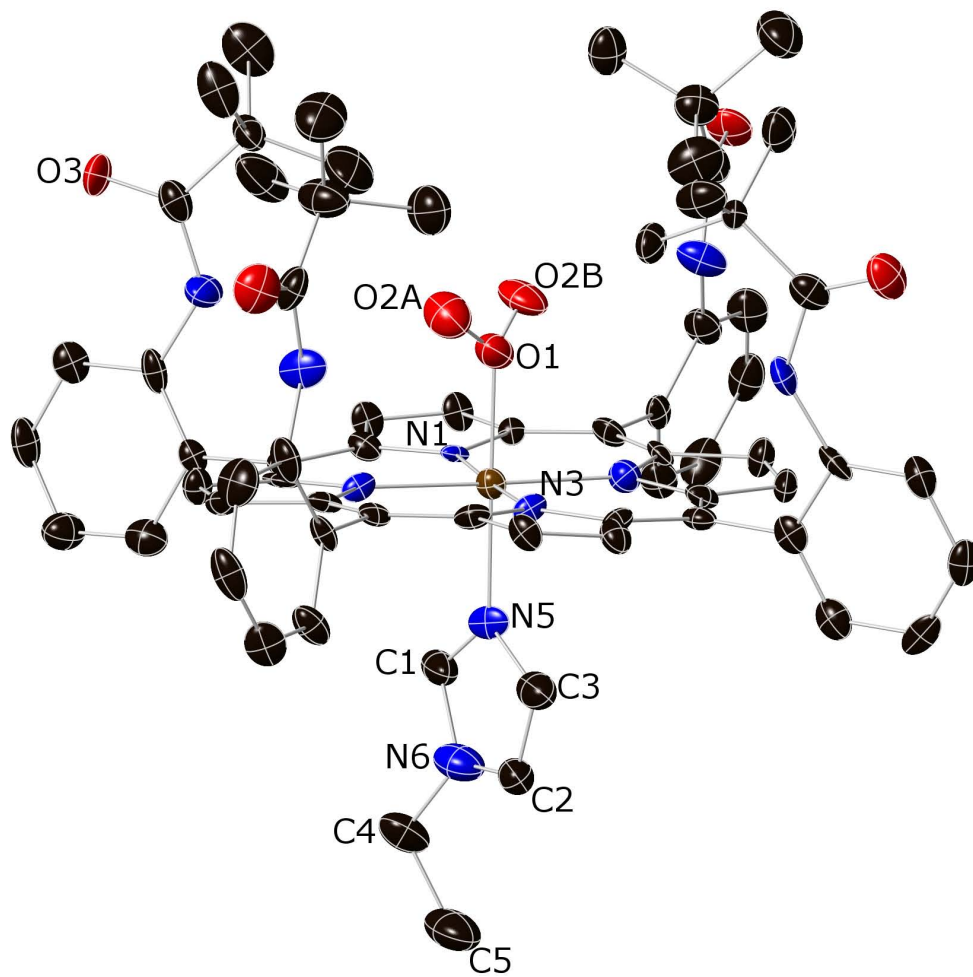

**Figure S11.** Edge-on view of the second  $[\text{Co}(\text{TpivPP})(1\text{-EtIm})(\text{O}_2)]$  ( $P\bar{1}$  form) crystal structure at 80 K displaying the atom labeling scheme. Thermal ellipsoids of all atoms are contoured at the 50% probability level. Populations: O2A = 0.77 (2), O2B = 0.23 (2). Hydrogen atoms have been omitted for clarity.



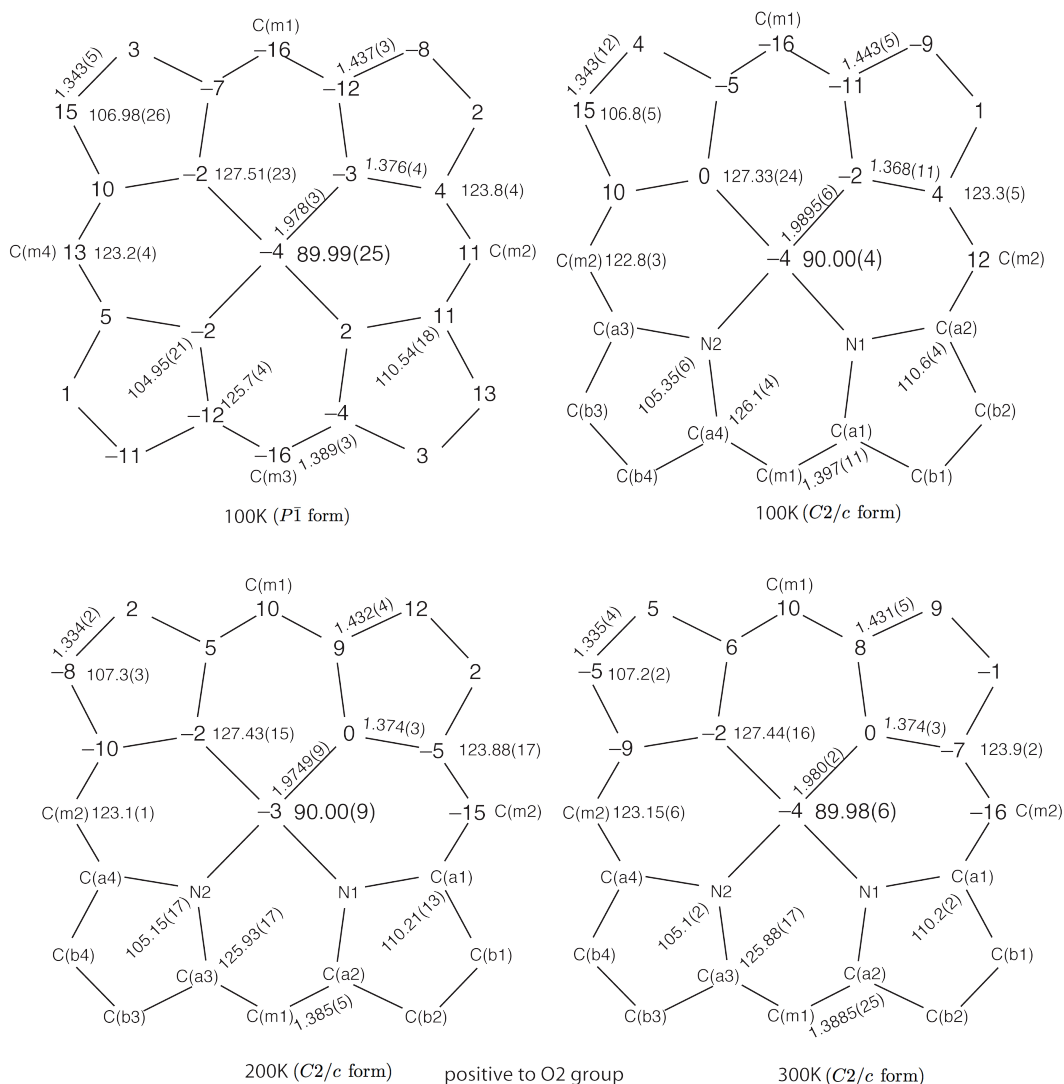

**Figure S12.** Formal diagrams of the porphyrin cores for  $[\text{Co}(\text{TpivPP})(1\text{-EtIm})(\text{O}_2)]$  at 100, 200 and 300 K. Averaged values of the chemically unique bond distances (in Å) and angles (in degrees) are shown. The numbers in parentheses are the esd's calculated on the assumption that the averaged values were all drawn from the same population. The perpendicular displacements (in units of 0.01 Å) of the porphyrin core atoms from the 24-atom mean plane are also displayed (positive values to pocket porphyrin side). For the three  $C2/c$  form structures, the molecule has twofold symmetry; the twofold axis-related atoms have the same value of the displacement.

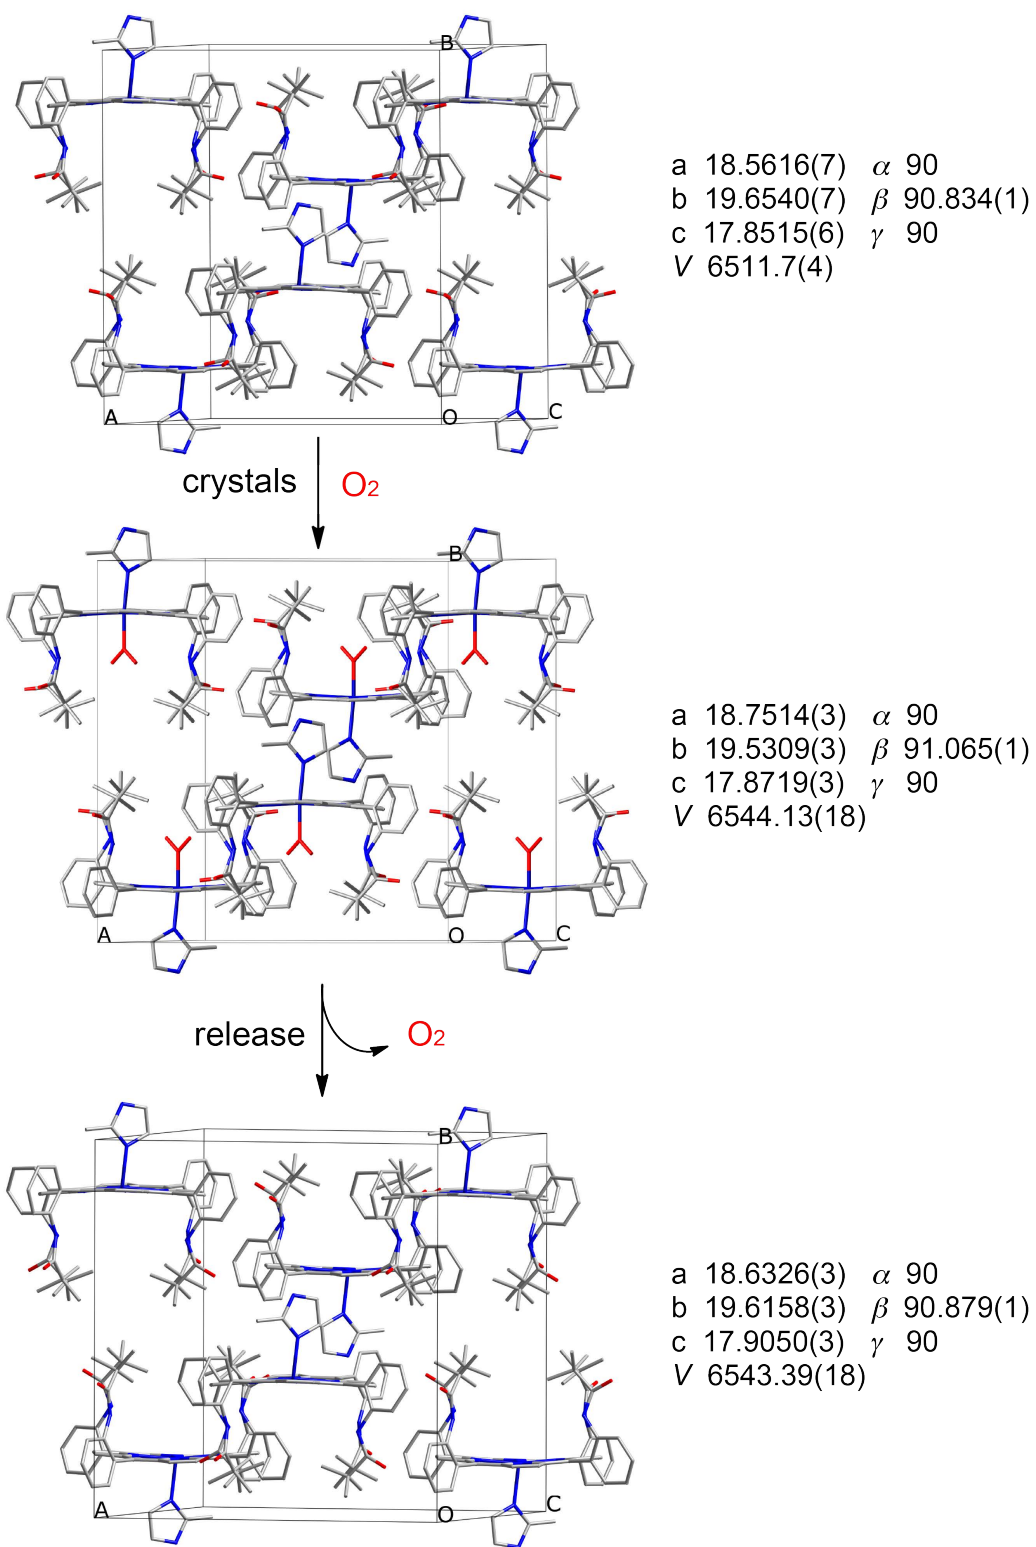

**Figure S13.** Packing diagrams of [Co(TpivPP)(2-MeHIm)] and the oxygen adduct [Co(TpivPP)(2-MeHIm)(O<sub>2</sub>)], showing the unit cell. Only one orientation of the pickets is shown in the oxygen complexes and hydrogens omitted for clarity.

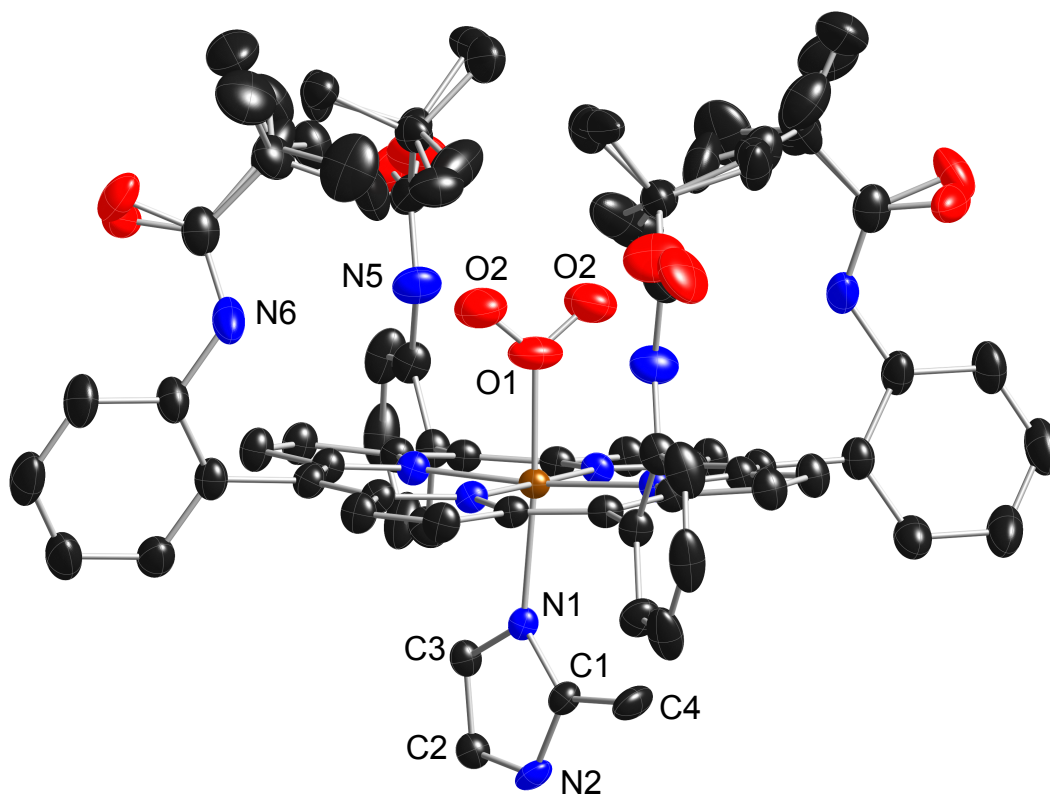

**Figure S14.** An edge-on thermal ellipsoid diagram of  $[\text{Co}(\text{TpivPP})(2\text{-MeHIm})(\text{O}_2)]$  (100 K) displaying the atom labeling scheme. Thermal ellipsoids of all atoms are contoured at the 50% probability level. Hydrogen atoms have been omitted for clarity.

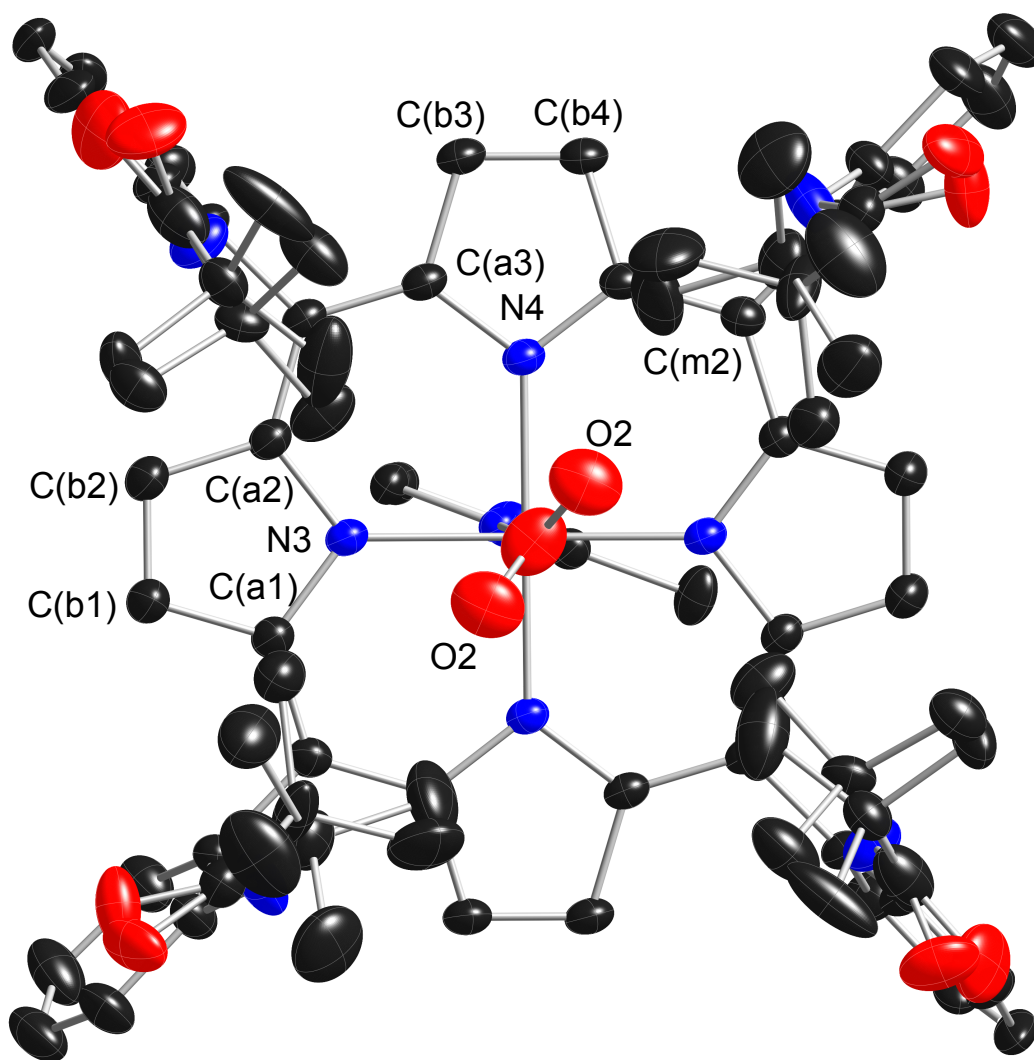

**Figure S15.** Top down view of the thermal ellipsoid diagram of  $[\text{Co}(\text{TpivPP})(2\text{-MeHIm})(\text{O}_2)]$  (100 K) displaying the atom labeling scheme. Thermal ellipsoids of all atoms are contoured at the 50% probability level. Hydrogen atoms have been omitted for clarity.

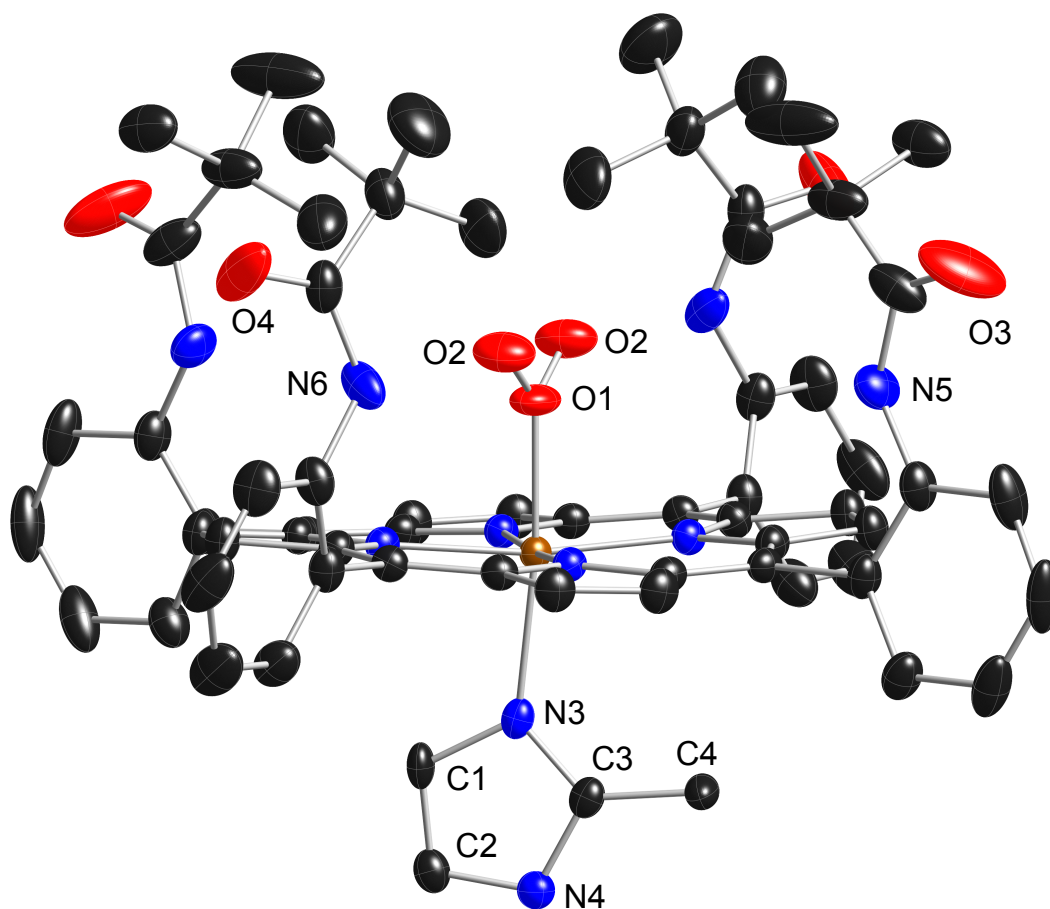

**Figure S16.** An edge-on thermal ellipsoid diagram of  $[\text{Co}(\text{TpivPP})(2\text{-MeHIm})_{0.4}(\text{O}_2)]$  (100 K) displaying the atom labeling scheme. Thermal ellipsoids of all atoms are contoured at the 50% probability level. Hydrogen atoms have been omitted for clarity.

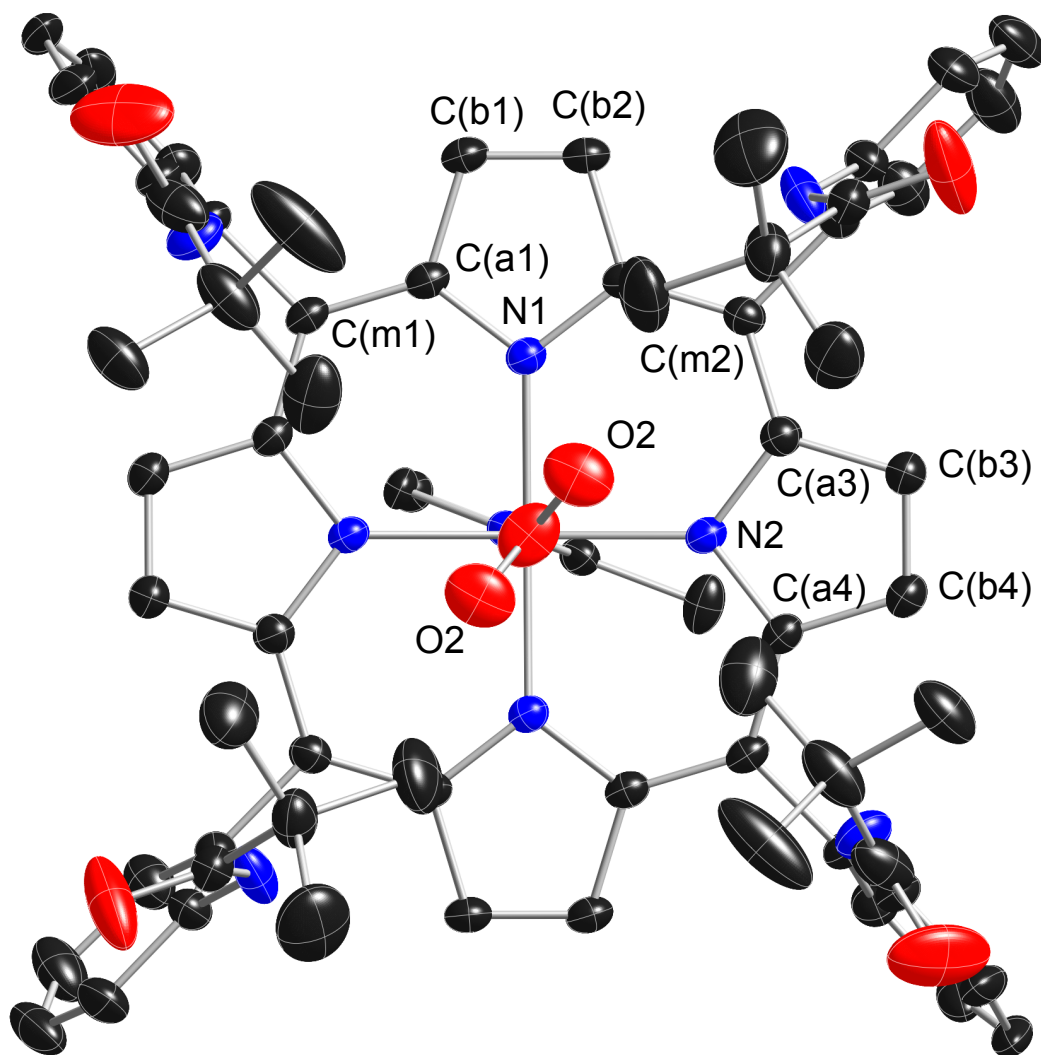

**Figure S17.** A top down view of the thermal ellipsoid diagram of  $[\text{Co}(\text{TpivPP})(2\text{-MeHIm})_{0.4}(\text{O}_2)]$  (100 K) displaying the atom labeling scheme. Thermal ellipsoids of all atoms are contoured at the 50% probability level. Hydrogen atoms have been omitted for clarity.

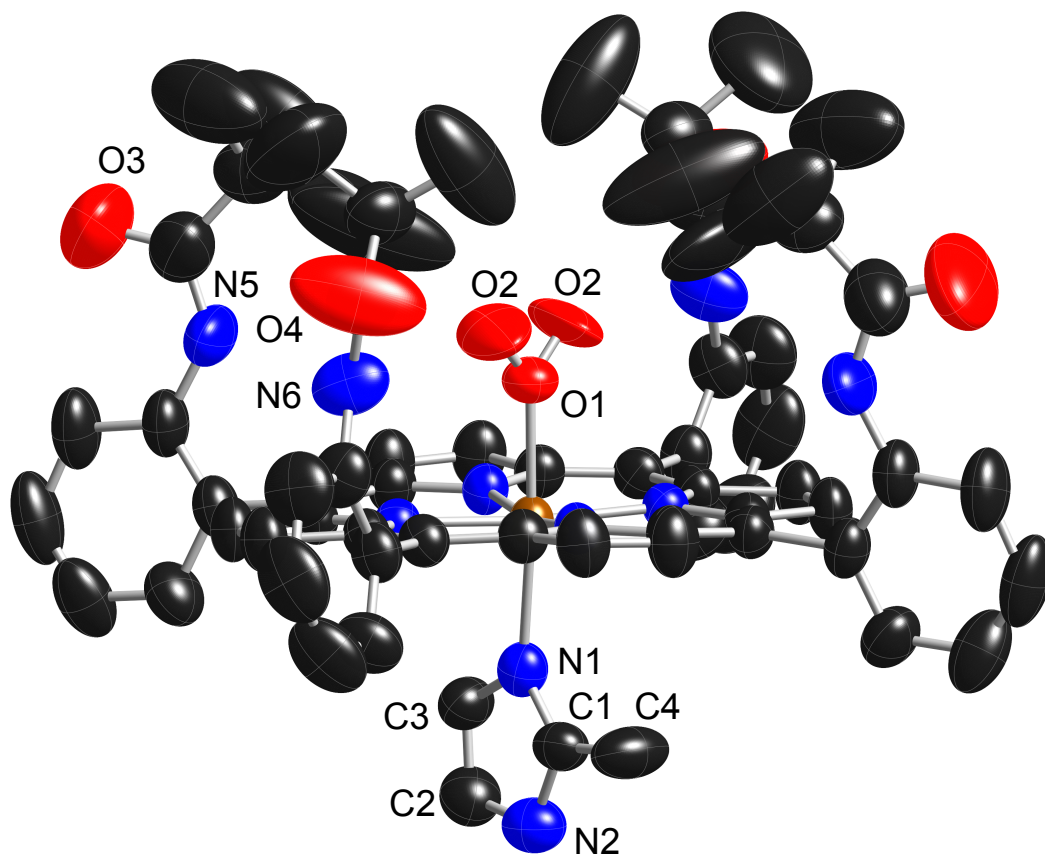

**Figure S18.** An edge-on view of the thermal ellipsoid diagram of [Co(TpivPP)(2-MeHIm)0.3(O<sub>2</sub>)] (300 K) displaying the atom labeling scheme. Thermal ellipsoids of all atoms are contoured at the 50% probability level. Hydrogen atoms have been omitted for clarity.

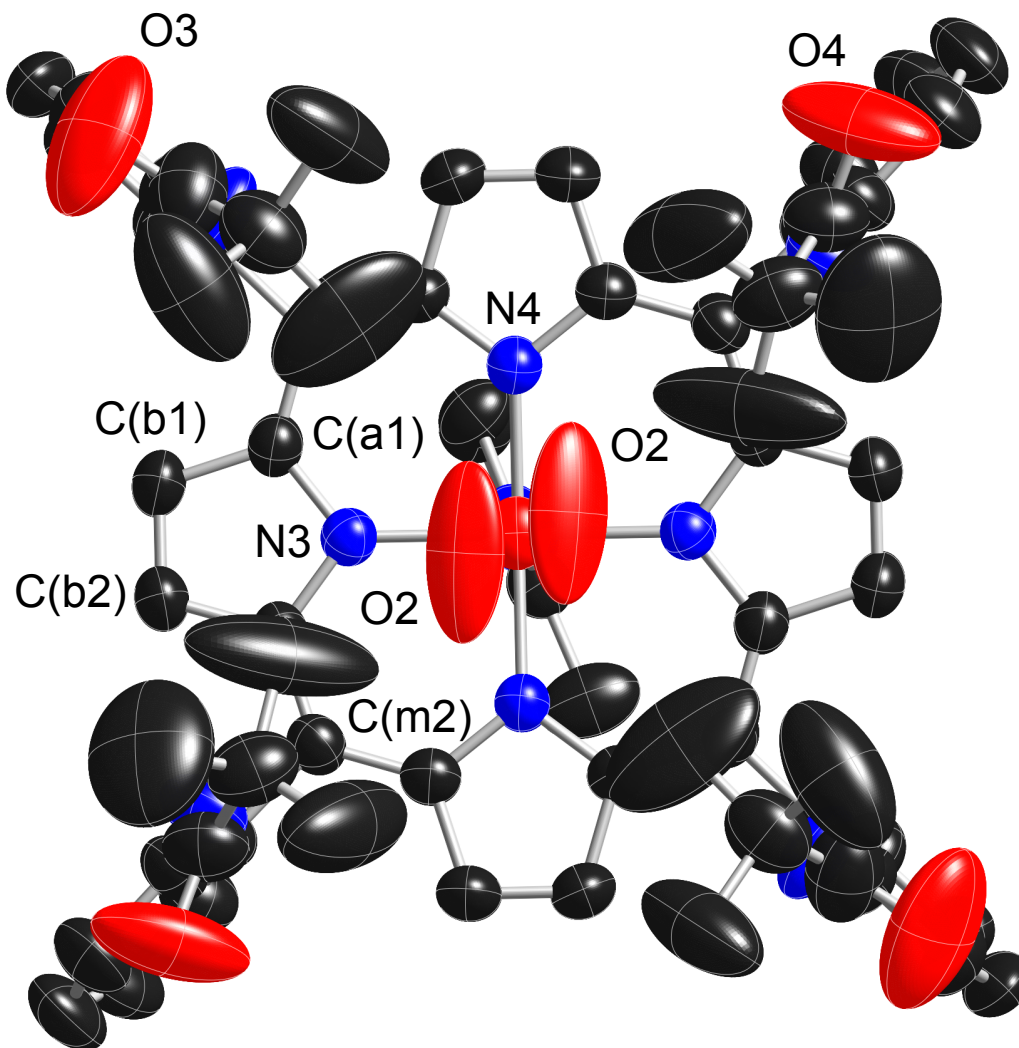

**Figure S19.** A top down view of the thermal ellipsoid diagram of [Co(TpivPP)(2-MeHIm)<sub>0.3</sub>(O<sub>2</sub>)] (300 K) displaying the atom labeling scheme. Thermal ellipsoids of all atoms are contoured at the 50% probability level. Hydrogen atoms have been omitted for clarity.



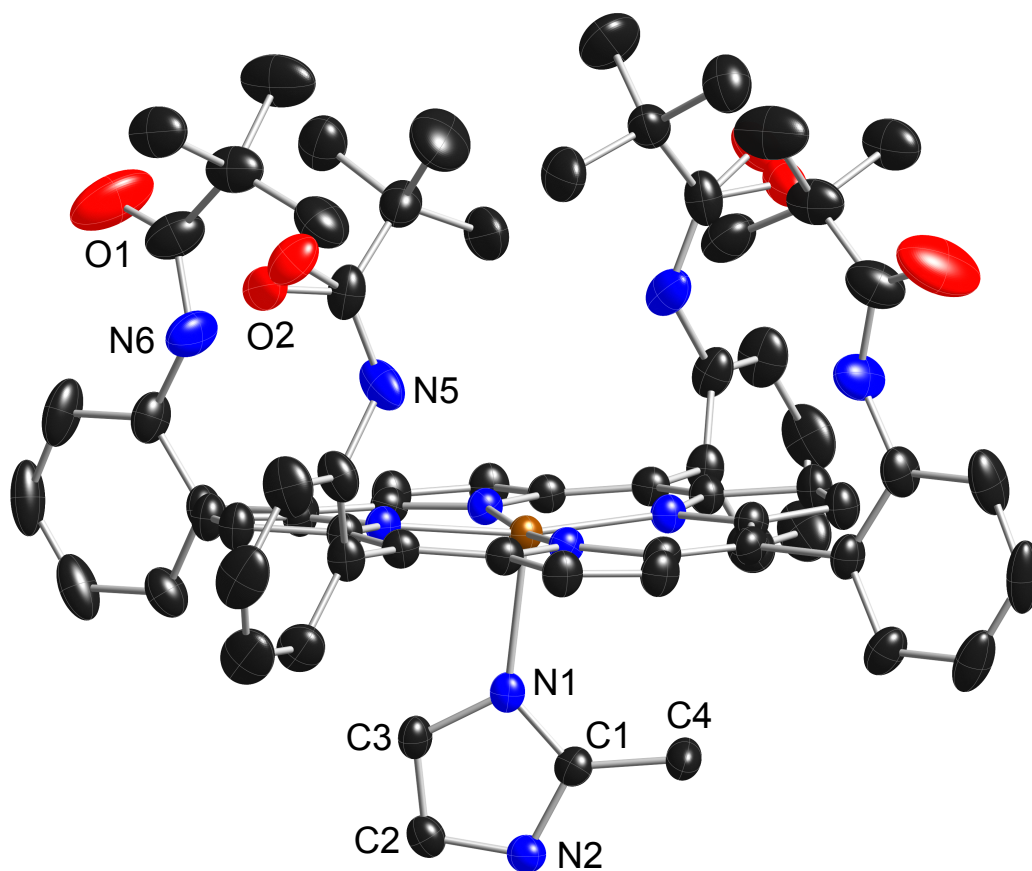

**Figure S20.** An edge-on thermal ellipsoid diagram of [Co(TpivPP)(2-MeHIm)] (100 K) displaying the atom labeling scheme. Thermal ellipsoids of all atoms are contoured at the 50% probability level. Hydrogen atoms have been omitted for clarity.

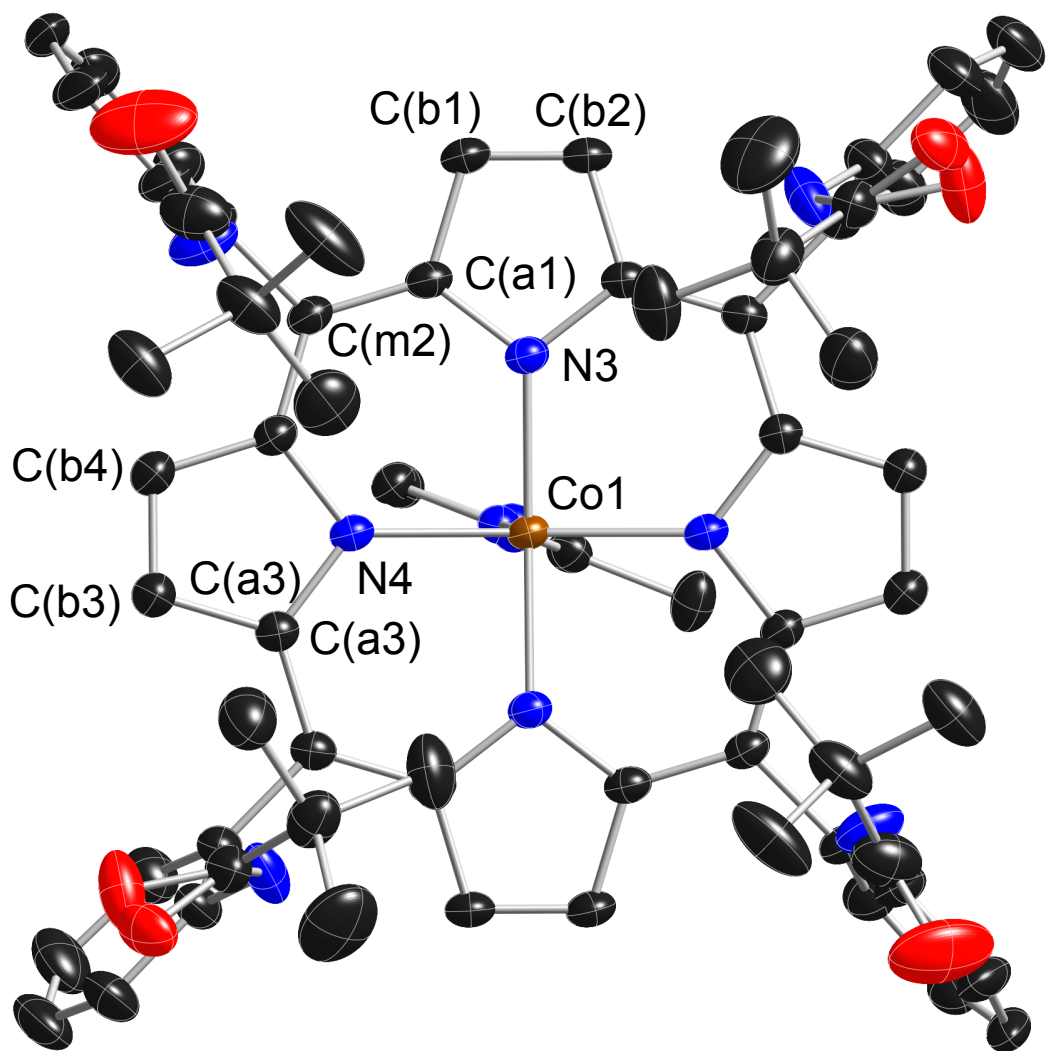

**Figure S21.** A top down view of the thermal ellipsoid diagram of  $[\text{Co}(\text{TpivPP})(2\text{-MeHIm})]$  (100 K) displaying the atom labeling scheme. Thermal ellipsoids of all atoms are contoured at the 50% probability level. Hydrogen atoms have been omitted for clarity.

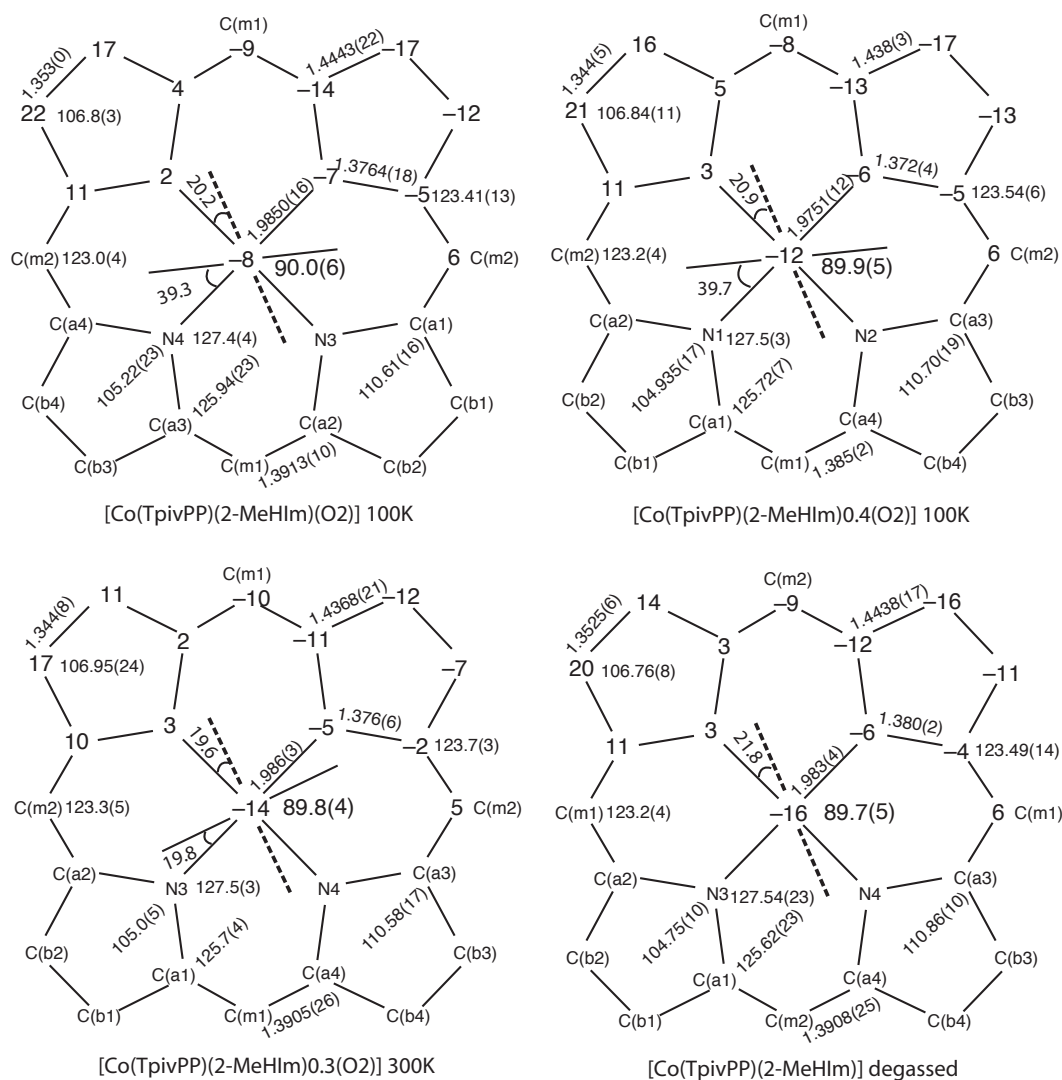

**Figure S22.** Formal diagram of the porphyrin cores of [Co(TpivPP)(2-MeHIm)] and oxygen adducts structure. Averaged values of the chemically unique bond distances (in Å) and angles (in degrees) are shown. The numbers in parentheses are the esd's calculated on the assumption that the averaged values were all drawn from the same population. The perpendicular displacements (in units of 0.01 Å) of the porphyrin core atoms from the 24-atom mean plane are also displayed (positive values to picket porphyrin side). All molecules have twofold symmetry; the twofold axis-related atoms have the same value of the displacement.

## PF Synthesis modifications

### Separation of the $\alpha, \alpha, \alpha, \alpha$ -H<sub>2</sub>T<sub>NH<sub>2</sub></sub>PP

Modifications has been made on the separation of H<sub>2</sub>T<sub>NH<sub>2</sub></sub>PP isomers to improve the yield of the  $\alpha, \alpha, \alpha, \alpha$ -H<sub>2</sub>T<sub>NH<sub>2</sub></sub>PP, which is the most polar of the four atropisomers of H<sub>2</sub>T<sub>NH<sub>2</sub></sub>PP.

**Adsorption and equilibrium.** In a three-neck 2 L round bottom flask, 3 g of H<sub>2</sub>T<sub>NH<sub>2</sub></sub>PP was dissolved in ~1 L of CHCl<sub>3</sub>, then ~250 g of silica gel (mesh 60-200) was added to this solution. The resultant red-green mixture was refluxed for two days with a stir bar to prevent “bumping” and under argon to avoid oxidation. After filtration, the silica gel was washed several times with CHCl<sub>3</sub> until the filtrate became almost colorless. This filtrate, called Fraction **I**, contains the “other” three isomers. Then the silica gel was washed with acetone-ethyl ether (1:1). This filtrate, called Fraction **II**, contains mainly the  $\alpha, \alpha, \alpha, \alpha$ -H<sub>2</sub>T<sub>NH<sub>2</sub></sub>PP isomer. CHCl<sub>3</sub> from Fraction **I** is removed to give solid H<sub>2</sub>T<sub>NH<sub>2</sub></sub>PP. Fraction **II** is evaporated to dryness and kept in freezer to prevent isomerization. Care must be exercised to prevent excessive heating which leads to isomerization of the  $\alpha, \alpha, \alpha, \alpha$  isomer (the temperature of the water bath should below 30°C).

**Chromatography.** The chromatography can be followed by TLC (CHCl<sub>3</sub>-EtO<sub>2</sub> 1:1 or C<sub>6</sub>H<sub>6</sub>-EtO<sub>2</sub> 1:1). The eluant used for the column chromatography is cooled to help prevent isomerization.

*First column.* Solid Fraction **II** is dissolved in about 300 mL of CHCl<sub>3</sub> then loaded onto a silica gel column (mesh 60-200, 6~7 in. × 2 in.). The column is eluted with CHCl<sub>3</sub> until the eluant is light red in color, then eluted with CHCl<sub>3</sub>-EtO<sub>2</sub> (1:1) until the eluant is very pale in color. These fractions are combined with Fraction **I** (see above). Acetone-ethyl ether (1:1) is then used to remove the remaining  $\alpha, \alpha, \alpha, \alpha$  isomer. The solution containing this isomer is

brought to dryness on a rotary evaporator.

*Second column.* The crude  $\alpha, \alpha, \alpha, \alpha$  isomer from the first column (in  $\sim 200$  mL  $\text{CHCl}_3$ ) is loaded onto a silica gel column (mesh 60-200,  $5\sim 6$  in.  $\times$  2 in.), then eluted with benzene-ethyl ether (1:1) until the eluant is very pale. The pure  $\alpha, \alpha, \alpha, \alpha$  isomer is then removed by elution with acetone-ethyl ether (1:1). This deeply red solution is brought to dryness on a rotary evaporator. The TLC showed some pink-blue impurities. To get rid of these, the solid was dissolved in  $\sim 300$  mL of  $\text{CH}_2\text{Cl}_2$  and  $\sim 100$  g of “carbon, decolorizing NORIT A” was added. This mixture was stirred for  $\sim 30$  min at room temperature. After filtration and evaporation of the solvent, the compound can be either recrystallized ( $\text{CH}_2\text{Cl}_2$ -EtOH) or used as is to synthesize picket fence porphyrin.

The combined Fraction **I**, which contains four isomers mixture, is evaporated to yield solid  $\text{H}_2\text{T}_{NH_2}\text{PP}$ . This  $\text{H}_2\text{T}_{NH_2}\text{PP}$  will be used in the next preparation of the  $\alpha, \alpha, \alpha, \alpha$  isomer.

### **Modifications on the Synthesis of [Co(TpivPP)]**

50 mL freshly distilled PhCl is transferred to a Schlenk where 0.8 g anhydrous  $\text{CoCl}_2$  has been loaded. The mixture is refluxed for 2 hours and then the solvent is distilled under argon. The residue is evaporated to dryness under vacuum to give homogeneous fine powder. Then the  $[\text{H}_2(\text{TpivPP})]$ , 2,6-lutidine and THF is transferred to the Schlenk to conduct the metalation reaction following the reported reaction and separation procedures (Collman, J. P. *et al.* *J. Am. Chem. Soc.* **1978**, *100*, 2761.).

**Table S1.** Complete Crystallographic Details for [Co(TpivPP)(1-EtIm)(O<sub>2</sub>)]·C<sub>6</sub>H<sub>6</sub> (100 K,  $P\bar{1}$  form)

|                                             |                                                                  |
|---------------------------------------------|------------------------------------------------------------------|
| formula                                     | C <sub>75</sub> H <sub>78</sub> CoN <sub>10</sub> O <sub>6</sub> |
| FW, amu                                     | 1274.40                                                          |
| <i>a</i> , Å                                | 13.0971(9)                                                       |
| <i>b</i> , Å                                | 13.5557(9)                                                       |
| <i>c</i> , Å                                | 18.2431(12)                                                      |
| $\alpha$ , deg                              | 89.216(4)                                                        |
| $\beta$ , deg                               | 88.444(3)                                                        |
| $\gamma$ , deg                              | 88.190(3)                                                        |
| <i>V</i> , Å <sup>3</sup>                   | 3235.8(4)                                                        |
| space group                                 | $P\bar{1}$                                                       |
| <i>Z</i>                                    | 2                                                                |
| D <sub>c</sub> , g/cm <sup>3</sup>          | 1.308                                                            |
| F(000)                                      | 1346                                                             |
| $\mu$ , mm <sup>-1</sup>                    | 0.328                                                            |
| crystal dimensions, mm                      | 0.39 × 0.26 × 0.19                                               |
| radiation                                   | MoK $\alpha$ , $\bar{\lambda}$ = 0.71073 Å                       |
| temperature, K                              | 100(2)                                                           |
| diffractometer                              | Bruker Apex CCD                                                  |
| $\theta$ range for collected data, deg      | 1.12–27.50                                                       |
| index range                                 | –16 ≤ <i>h</i> ≤ 17<br>–17 ≤ <i>k</i> ≤ 17<br>0 ≤ <i>l</i> ≤ 23  |
| total data collected                        | 14752                                                            |
| absorption correction                       | Semi-empirical from equiv                                        |
| relative transmission coefficients (I)      | 0.9402 and 0.8826                                                |
| unique data                                 | 14752 ( $R_{\text{int}} = 0.000$ )                               |
| unique observed data [ $I > 2\sigma(I)$ ]   | 11334                                                            |
| refinement method                           | Full-matrix least-squares on $F^2$                               |
| data/restraints/parameters                  | 14752/0/840                                                      |
| goodness-of-fit (pased on $F^2$ )           | 1.084                                                            |
| final <i>R</i> indices [ $I > 2\sigma(I)$ ] | $R_1 = 0.0496$ , $wR_2 = 0.1276$                                 |
| final <i>R</i> indices (all data)           | $R_1 = 0.0744$ , $wR_2 = 0.1466$                                 |

**Table S2.** Atomic Coordinates and Equivalent Isotropic Displacement Parameters ( $\text{\AA}^2$ ) for  $[\text{Co}(\text{TpivPP})(1\text{-EtIm})(\text{O}_2)]\cdot\text{C}_6\text{H}_6$  (100 K,  $P\bar{1}$  form)<sup>a</sup>

| atom  | <i>x</i>    | <i>y</i>    | <i>z</i>    | <i>U</i> (eq) |
|-------|-------------|-------------|-------------|---------------|
| Co(1) | 0.86574(2)  | 0.86177(3)  | 0.74498(2)  | 0.0142(1)     |
| O(1)  | 0.75770(16) | 0.77108(15) | 0.74678(11) | 0.0249(4)     |
| O(2a) | 0.7684(2)   | 0.68960(19) | 0.77771(14) | 0.0306(8)     |
| O(2b) | 0.6817(9)   | 0.7784(10)  | 0.7305(7)   | 0.037(4)      |
| O(3)  | 0.53787(18) | 0.79972(18) | 1.08660(11) | 0.0356(5)     |
| O(4)  | 0.98034(19) | 0.32767(17) | 0.88924(14) | 0.0412(6)     |
| O(5)  | 0.79572(18) | 0.53612(18) | 0.41818(11) | 0.0348(5)     |
| O(6)  | 0.32231(15) | 0.97895(17) | 0.61707(12) | 0.0312(5)     |
| N(1)  | 0.76791(16) | 0.95892(16) | 0.78998(11) | 0.0153(4)     |
| N(2)  | 0.90821(16) | 0.81843(16) | 0.84371(11) | 0.0153(4)     |
| N(3)  | 0.95930(16) | 0.76127(17) | 0.70000(11) | 0.0167(4)     |
| N(4)  | 0.82165(16) | 0.90433(16) | 0.64613(11) | 0.0154(4)     |
| N(5)  | 0.97810(16) | 0.96019(17) | 0.74048(12) | 0.0193(4)     |
| N(6)  | 1.07772(17) | 1.08020(18) | 0.76685(14) | 0.0250(5)     |
| N(7)  | 0.63301(18) | 0.86855(19) | 0.99561(12) | 0.0244(5)     |
| N(8)  | 0.9725(2)   | 0.49006(19) | 0.86017(15) | 0.0313(6)     |
| N(9)  | 0.85828(18) | 0.64212(19) | 0.49880(12) | 0.0241(5)     |
| N(10) | 0.49547(18) | 0.97243(18) | 0.61948(13) | 0.0256(5)     |
| C(a1) | 0.69636(19) | 1.0184(2)   | 0.75472(14) | 0.0171(5)     |
| C(a2) | 0.7528(2)   | 0.9791(2)   | 0.86299(14) | 0.0184(5)     |
| C(a3) | 0.87794(19) | 0.8581(2)   | 0.91016(13) | 0.0170(5)     |
| C(a4) | 0.97577(19) | 0.7424(2)   | 0.86078(13) | 0.0168(5)     |
| C(a5) | 1.01948(19) | 0.6915(2)   | 0.73558(14) | 0.0177(5)     |
| C(a6) | 0.98019(19) | 0.7466(2)   | 0.62653(13) | 0.0174(5)     |
| C(a7) | 0.86185(19) | 0.8739(2)   | 0.57976(13) | 0.0169(5)     |
| C(a8) | 0.7460(2)   | 0.9730(2)   | 0.62948(14) | 0.0180(5)     |
| C(b1) | 0.6354(2)   | 1.0743(2)   | 0.80711(14) | 0.0215(6)     |
| C(b2) | 0.6712(2)   | 1.0507(2)   | 0.87354(15) | 0.0214(6)     |
| C(b3) | 0.9267(2)   | 0.8054(2)   | 0.96928(14) | 0.0198(5)     |
| C(b4) | 0.9867(2)   | 0.7344(2)   | 0.93907(14) | 0.0211(6)     |
| C(b5) | 1.0766(2)   | 0.6316(2)   | 0.68359(14) | 0.0218(6)     |
| C(b6) | 1.0528(2)   | 0.6662(2)   | 0.61624(15) | 0.0222(6)     |
| C(b7) | 0.8107(2)   | 0.9244(2)   | 0.52046(14) | 0.0200(6)     |
| C(b8) | 0.7389(2)   | 0.9845(2)   | 0.55129(14) | 0.0215(6)     |

**Table S2.** Continued

| atom  | <i>x</i>    | <i>y</i>  | <i>z</i>    | <i>U</i> (eq) |
|-------|-------------|-----------|-------------|---------------|
| C(m1) | 0.8065(2)   | 0.9348(2) | 0.92004(14) | 0.0182(5)     |
| C(m2) | 1.0282(2)   | 0.6820(2) | 0.81104(14) | 0.0176(5)     |
| C(m3) | 0.93812(19) | 0.8013(2) | 0.56926(13) | 0.0171(5)     |
| C(m4) | 0.6852(2)   | 1.0265(2) | 0.67913(14) | 0.0180(5)     |
| C(1)  | 0.9887(2)   | 1.0356(2) | 0.78350(16) | 0.0249(6)     |
| C(2)  | 1.1259(2)   | 1.0309(2) | 0.71219(15) | 0.0263(6)     |
| C(3)  | 1.0644(2)   | 0.9569(2) | 0.69524(16) | 0.0255(6)     |
| C(4)  | 1.1156(2)   | 1.1621(2) | 0.81007(17) | 0.0311(7)     |
| C(5)  | 1.2018(3)   | 1.2144(3) | 0.7688(2)   | 0.0436(9)     |
| C(6)  | 0.7808(2)   | 0.9687(2) | 0.99653(14) | 0.0188(5)     |
| C(7)  | 0.6934(2)   | 0.9333(2) | 1.03375(14) | 0.0213(6)     |
| C(8)  | 0.6680(2)   | 0.9662(2) | 1.10426(15) | 0.0250(6)     |
| C(9)  | 0.7301(2)   | 1.0327(2) | 1.13725(15) | 0.0271(7)     |
| C(10) | 0.8162(2)   | 1.0677(2) | 1.10177(16) | 0.0265(6)     |
| C(11) | 0.8411(2)   | 1.0351(2) | 1.03122(15) | 0.0236(6)     |
| C(12) | 1.1042(2)   | 0.6073(2) | 0.83994(13) | 0.0188(5)     |
| C(13) | 1.0759(2)   | 0.5139(2) | 0.86567(15) | 0.0245(6)     |
| C(14) | 1.1492(3)   | 0.4487(3) | 0.89389(17) | 0.0341(7)     |
| C(15) | 1.2501(2)   | 0.4744(3) | 0.89424(17) | 0.0368(8)     |
| C(16) | 1.2794(2)   | 0.5642(3) | 0.86740(17) | 0.0340(8)     |
| C(17) | 1.2067(2)   | 0.6309(2) | 0.84145(15) | 0.0260(6)     |
| C(18) | 0.9704(2)   | 0.7770(2) | 0.49196(14) | 0.0194(6)     |
| C(19) | 0.9282(2)   | 0.6983(2) | 0.45656(14) | 0.0194(6)     |
| C(20) | 0.9549(2)   | 0.6776(2) | 0.38387(14) | 0.0235(6)     |
| C(21) | 1.0235(2)   | 0.7379(2) | 0.34684(15) | 0.0267(7)     |
| C(22) | 1.0659(2)   | 0.8161(2) | 0.38040(15) | 0.0273(7)     |
| C(23) | 1.0394(2)   | 0.8354(2) | 0.45357(15) | 0.0234(6)     |
| C(24) | 0.6082(2)   | 1.1010(2) | 0.65135(14) | 0.0203(6)     |
| C(25) | 0.5150(2)   | 1.0735(2) | 0.62297(15) | 0.0228(6)     |
| C(26) | 0.4453(2)   | 1.1459(2) | 0.59872(16) | 0.0289(7)     |
| C(27) | 0.4668(2)   | 1.2445(2) | 0.60530(16) | 0.0305(7)     |
| C(28) | 0.5571(2)   | 1.2725(2) | 0.63468(17) | 0.0303(7)     |
| C(29) | 0.6277(2)   | 1.2004(2) | 0.65647(15) | 0.0248(6)     |
| C(30) | 0.5612(2)   | 0.8069(2) | 1.02161(14) | 0.0234(6)     |



**Table S2.** Continued

| atom  | <i>x</i>  | <i>y</i>  | <i>z</i>    | <i>U</i> (eq) |
|-------|-----------|-----------|-------------|---------------|
| C(31) | 0.5086(2) | 0.7457(2) | 0.96425(15) | 0.0232(6)     |
| C(32) | 0.3932(2) | 0.7625(3) | 0.97739(19) | 0.0365(8)     |
| C(33) | 0.5369(3) | 0.6370(2) | 0.97927(18) | 0.0363(8)     |
| C(34) | 0.5361(3) | 0.7730(3) | 0.88485(16) | 0.0446(9)     |
| C(35) | 0.9317(2) | 0.3999(2) | 0.86842(15) | 0.0269(6)     |
| C(36) | 0.8185(2) | 0.3958(2) | 0.85183(16) | 0.0290(7)     |
| C(37) | 0.7887(3) | 0.2871(3) | 0.8524(2)   | 0.0417(8)     |
| C(38) | 0.7985(3) | 0.4397(3) | 0.77569(17) | 0.0344(7)     |
| C(39) | 0.7579(2) | 0.4510(3) | 0.91179(17) | 0.0361(8)     |
| C(40) | 0.7984(2) | 0.5680(2) | 0.48016(14) | 0.0200(6)     |
| C(41) | 0.7354(2) | 0.5232(2) | 0.54399(14) | 0.0198(5)     |
| C(42) | 0.6259(2) | 0.5137(2) | 0.51839(16) | 0.0277(6)     |
| C(43) | 0.7836(2) | 0.4213(2) | 0.55941(17) | 0.0280(6)     |
| C(44) | 0.7335(2) | 0.5848(2) | 0.61379(15) | 0.0255(6)     |
| C(45) | 0.4022(2) | 0.9308(2) | 0.61884(14) | 0.0222(6)     |
| C(46) | 0.4017(2) | 0.8178(2) | 0.62260(15) | 0.0250(6)     |
| C(47) | 0.3550(2) | 0.7912(3) | 0.69790(17) | 0.0339(7)     |
| C(48) | 0.3301(3) | 0.7838(3) | 0.56279(18) | 0.0398(8)     |
| C(49) | 0.5066(3) | 0.7680(2) | 0.61110(18) | 0.0348(7)     |
| C(1S) | 0.3990(3) | 0.5090(3) | 0.70056(18) | 0.0385(8)     |
| C(2S) | 0.3685(3) | 0.4163(3) | 0.72187(19) | 0.0388(8)     |
| C(3S) | 0.4205(3) | 0.3641(3) | 0.77608(19) | 0.0373(8)     |
| C(4S) | 0.5027(2) | 0.4051(3) | 0.80864(17) | 0.0343(7)     |
| C(5S) | 0.5332(3) | 0.4986(3) | 0.78780(19) | 0.0365(8)     |
| C(6S) | 0.4815(3) | 0.5501(3) | 0.73332(19) | 0.0394(8)     |

<sup>a</sup>*U*(eq) is defined as one third of the trace of the orthogonalized  $\mathbf{U}_{ij}$  tensor. The estimated standard deviations of the least significant digits are given in parentheses.

**Table S3.** Bond Lengths for [Co(TpivPP)(1-EtIm)(O<sub>2</sub>)]·C<sub>6</sub>H<sub>6</sub> (100 K, *P* $\bar{1}$  form)<sup>a</sup>

| bond       | length (Å) | bond         | length (Å) |
|------------|------------|--------------|------------|
| Co(1)–O(1) | 1.9029(19) | C(14)–C(15)  | 1.377(5)   |
| Co(1)–N(3) | 1.975(2)   | C(14)–H(14a) | 0.9500     |
| Co(1)–N(2) | 1.976(2)   | C(15)–C(16)  | 1.368(5)   |
| Co(1)–N(1) | 1.979(2)   | C(15)–H(15a) | 0.9500     |
| Co(1)–N(4) | 1.981(2)   | C(16)–C(17)  | 1.381(4)   |
| Co(1)–N(5) | 2.017(2)   | C(16)–H(16a) | 0.9500     |
| O(1)–O(2b) | 1.048(12)  | C(17)–H(17a) | 0.9500     |
| O(1)–O(2a) | 1.239(3)   | C(18)–C(23)  | 1.389(4)   |
| O(3)–C(30) | 1.220(3)   | C(18)–C(19)  | 1.391(4)   |
| O(4)–C(35) | 1.213(4)   | C(19)–C(20)  | 1.392(4)   |
| O(5)–C(40) | 1.218(3)   | C(20)–C(21)  | 1.389(4)   |
| O(6)–C(45) | 1.217(3)   | C(20)–H(20a) | 0.9500     |
| N(1)–C(a2) | 1.371(3)   | C(21)–C(22)  | 1.372(5)   |
| N(1)–C(a1) | 1.383(3)   | C(21)–H(21a) | 0.9500     |
| N(2)–C(a4) | 1.375(3)   | C(22)–C(23)  | 1.397(4)   |
| N(2)–C(a3) | 1.376(3)   | C(22)–H(22a) | 0.9500     |
| N(3)–C(a6) | 1.377(3)   | C(23)–H(23a) | 0.9500     |
| N(3)–C(a5) | 1.379(3)   | C(24)–C(29)  | 1.385(4)   |
| N(4)–C(a7) | 1.371(3)   | C(24)–C(25)  | 1.402(4)   |
| N(4)–C(a8) | 1.375(3)   | C(25)–C(26)  | 1.395(4)   |
| N(5)–C(1)  | 1.310(4)   | C(26)–C(27)  | 1.383(5)   |
| N(5)–C(3)  | 1.381(4)   | C(26)–H(26a) | 0.9500     |
| N(6)–C(2)  | 1.340(4)   | C(27)–C(28)  | 1.379(5)   |
| N(6)–C(1)  | 1.356(4)   | C(27)–H(27a) | 0.9500     |
| N(6)–C(4)  | 1.476(4)   | C(28)–C(29)  | 1.385(4)   |
| N(7)–C(30) | 1.350(4)   | C(28)–H(28a) | 0.9500     |
| N(7)–C(7)  | 1.404(4)   | C(29)–H(29a) | 0.9500     |
| N(7)–H(7a) | 0.8800     | C(30)–C(31)  | 1.535(4)   |
| N(8)–C(35) | 1.354(4)   | C(31)–C(34)  | 1.527(4)   |
| N(8)–C(13) | 1.410(4)   | C(31)–C(33)  | 1.531(4)   |
| N(8)–H(8a) | 0.8800     | C(31)–C(32)  | 1.534(4)   |
| N(9)–C(40) | 1.347(4)   | C(32)–H(32a) | 0.9800     |
| N(9)–C(19) | 1.415(4)   | C(32)–H(32b) | 0.9800     |
| N(9)–H(9a) | 0.8800     | C(32)–H(32C) | 0.9800     |

**Table S3.** Continued

| bond         | length (Å) | bond         | length (Å) |
|--------------|------------|--------------|------------|
| N(10)–C(45)  | 1.362(4)   | C(33)–H(33a) | 0.9800     |
| N(10)–C(25)  | 1.404(4)   | C(33)–H(33b) | 0.9800     |
| N(10)–H(10a) | 0.8800     | C(33)–H(33C) | 0.9800     |
| C(a1)–C(m4)  | 1.393(4)   | C(34)–H(34a) | 0.9800     |
| C(a1)–C(b1)  | 1.437(4)   | C(34)–H(34b) | 0.9800     |
| C(a2)–C(m1)  | 1.391(4)   | C(34)–H(34C) | 0.9800     |
| C(a2)–C(b2)  | 1.432(4)   | C(35)–C(36)  | 1.524(5)   |
| C(a3)–C(m1)  | 1.386(4)   | C(36)–C(39)  | 1.525(4)   |
| C(a3)–C(b3)  | 1.439(4)   | C(36)–C(38)  | 1.529(4)   |
| C(a4)–C(m2)  | 1.384(4)   | C(36)–C(37)  | 1.536(5)   |
| C(a4)–C(b4)  | 1.442(3)   | C(37)–H(37a) | 0.9800     |
| C(a5)–C(m2)  | 1.388(4)   | C(37)–H(37b) | 0.9800     |
| C(a5)–C(b5)  | 1.436(4)   | C(37)–H(37C) | 0.9800     |
| C(a6)–C(m3)  | 1.389(4)   | C(38)–H(38a) | 0.9800     |
| C(a6)–C(b6)  | 1.434(4)   | C(38)–H(38b) | 0.9800     |
| C(a7)–C(m3)  | 1.391(4)   | C(38)–H(38C) | 0.9800     |
| C(a7)–C(b7)  | 1.441(3)   | C(39)–H(39a) | 0.9800     |
| C(a8)–C(m4)  | 1.387(4)   | C(39)–H(39b) | 0.9800     |
| C(a8)–C(b8)  | 1.438(4)   | C(39)–H(39C) | 0.9800     |
| C(b1)–C(b2)  | 1.342(4)   | C(40)–C(41)  | 1.538(4)   |
| C(b1)–H(ba)  | 0.9500     | C(41)–C(43)  | 1.527(4)   |
| C(b2)–H(bb)  | 0.9500     | C(41)–C(42)  | 1.531(4)   |
| C(b3)–C(b4)  | 1.338(4)   | C(41)–C(44)  | 1.531(4)   |
| C(b3)–H(bc)  | 0.9500     | C(42)–H(42a) | 0.9800     |
| C(b4)–H(bd)  | 0.9500     | C(42)–H(42b) | 0.9800     |
| C(b5)–C(b6)  | 1.350(4)   | C(42)–H(42C) | 0.9800     |
| C(b5)–H(be)  | 0.9500     | C(43)–H(43a) | 0.9800     |
| C(b6)–H(bF)  | 0.9500     | C(43)–H(43b) | 0.9800     |
| C(b7)–C(b8)  | 1.342(4)   | C(43)–H(43C) | 0.9800     |
| C(b7)–H(bg)  | 0.9500     | C(44)–H(44a) | 0.9800     |
| C(b8)–H(bH)  | 0.9500     | C(44)–H(44b) | 0.9800     |
| C(m1)–C(6)   | 1.501(3)   | C(44)–H(44C) | 0.9800     |
| C(m2)–C(12)  | 1.498(3)   | C(45)–C(46)  | 1.532(4)   |
| C(m3)–C(18)  | 1.499(3)   | C(46)–C(49)  | 1.522(4)   |

**Table S3.** Continued

| bond         | length (Å) | bond         | length (Å) |
|--------------|------------|--------------|------------|
| C(m4)–C(24)  | 1.498(3)   | C(46)–C(47)  | 1.532(4)   |
| C(1)–H(1a)   | 0.9500     | C(46)–C(48)  | 1.542(4)   |
| C(2)–C(3)    | 1.350(4)   | C(47)–H(47a) | 0.9800     |
| C(2)–H(2a)   | 0.9500     | C(47)–H(47b) | 0.9800     |
| C(3)–H(3a)   | 0.9500     | C(47)–H(47C) | 0.9800     |
| C(4)–C(5)    | 1.527(5)   | C(48)–H(48a) | 0.9800     |
| C(4)–H(4a)   | 0.9900     | C(48)–H(48b) | 0.9800     |
| C(4)–H(4b)   | 0.9900     | C(48)–H(48C) | 0.9800     |
| C(5)–H(5a)   | 0.9800     | C(49)–H(49a) | 0.9800     |
| C(5)–H(5b)   | 0.9800     | C(49)–H(49b) | 0.9800     |
| C(5)–H(5C)   | 0.9800     | C(49)–H(49C) | 0.9800     |
| C(6)–C(11)   | 1.388(4)   | C(1S)–C(2S)  | 1.378(5)   |
| C(6)–C(7)    | 1.408(4)   | C(1S)–C(6S)  | 1.385(5)   |
| C(7)–C(8)    | 1.396(4)   | C(1S)–H(1Sa) | 0.9500     |
| C(8)–C(9)    | 1.386(4)   | C(2S)–C(3S)  | 1.389(5)   |
| C(8)–H(8b)   | 0.9500     | C(2S)–H(2Sa) | 0.9500     |
| C(9)–C(10)   | 1.379(5)   | C(3S)–C(4S)  | 1.379(5)   |
| C(9)–H(9b)   | 0.9500     | C(3S)–H(3Sa) | 0.9500     |
| C(10)–C(11)  | 1.394(4)   | C(4S)–C(5S)  | 1.385(5)   |
| C(10)–H(10b) | 0.9500     | C(4S)–H(4Sa) | 0.9500     |
| C(11)–H(11a) | 0.9500     | C(5S)–C(6S)  | 1.386(5)   |
| C(12)–C(17)  | 1.391(4)   | C(5S)–H(5Sa) | 0.9500     |
| C(12)–C(13)  | 1.401(4)   | C(6S)–H(6Sa) | 0.9500     |
| C(13)–C(14)  | 1.389(4)   |              |            |

<sup>a</sup>The estimated standard deviations of the least significant digits are given in parentheses.

**Table S4.** Bond Angles for [Co(TpivPP)(1-EtIm)(O<sub>2</sub>)]·C<sub>6</sub>H<sub>6</sub> (100 K, P $\bar{1}$  form)<sup>a</sup>

| angle            | degree     | angle              | degree   |
|------------------|------------|--------------------|----------|
| O(1)–Co(1)–N(3)  | 90.41(9)   | C(12)–C(17)–H(17a) | 119.4    |
| O(1)–Co(1)–N(2)  | 91.53(9)   | C(23)–C(18)–C(19)  | 119.1(2) |
| N(3)–Co(1)–N(2)  | 90.32(9)   | C(23)–C(18)–C(m3)  | 120.4(3) |
| O(1)–Co(1)–N(1)  | 87.48(9)   | C(19)–C(18)–C(m3)  | 120.5(2) |
| N(3)–Co(1)–N(1)  | 177.89(8)  | C(18)–C(19)–C(20)  | 120.8(3) |
| N(2)–Co(1)–N(1)  | 89.79(8)   | C(18)–C(19)–N(9)   | 116.1(2) |
| O(1)–Co(1)–N(4)  | 87.80(9)   | C(20)–C(19)–N(9)   | 123.2(3) |
| N(3)–Co(1)–N(4)  | 89.80(9)   | C(21)–C(20)–C(19)  | 118.8(3) |
| N(2)–Co(1)–N(4)  | 179.32(8)  | C(21)–C(20)–H(20a) | 120.6    |
| N(1)–Co(1)–N(4)  | 90.06(8)   | C(19)–C(20)–H(20a) | 120.6    |
| O(1)–Co(1)–N(5)  | 178.20(10) | C(22)–C(21)–C(20)  | 121.6(3) |
| N(3)–Co(1)–N(5)  | 90.11(10)  | C(22)–C(21)–H(21a) | 119.2    |
| N(2)–Co(1)–N(5)  | 90.18(9)   | C(20)–C(21)–H(21a) | 119.2    |
| N(1)–Co(1)–N(5)  | 92.00(9)   | C(21)–C(22)–C(23)  | 119.1(3) |
| N(4)–Co(1)–N(5)  | 90.48(9)   | C(21)–C(22)–H(22a) | 120.5    |
| O(2b)–O(1)–O(2a) | 107.6(8)   | C(23)–C(22)–H(22a) | 120.5    |
| O(2b)–O(1)–Co(1) | 131.7(8)   | C(18)–C(23)–C(22)  | 120.7(3) |
| O(2a)–O(1)–Co(1) | 120.3(2)   | C(18)–C(23)–H(23a) | 119.6    |
| C(a2)–N(1)–C(a1) | 104.7(2)   | C(22)–C(23)–H(23a) | 119.6    |
| C(a2)–N(1)–Co(1) | 127.83(17) | C(29)–C(24)–C(25)  | 118.8(2) |
| C(a1)–N(1)–Co(1) | 127.40(16) | C(29)–C(24)–C(m4)  | 119.1(3) |
| C(a4)–N(2)–C(a3) | 105.0(2)   | C(25)–C(24)–C(m4)  | 122.1(3) |
| C(a4)–N(2)–Co(1) | 127.24(16) | C(26)–C(25)–C(24)  | 119.8(3) |
| C(a3)–N(2)–Co(1) | 127.78(17) | C(26)–C(25)–N(10)  | 122.0(3) |
| C(a6)–N(3)–C(a5) | 104.9(2)   | C(24)–C(25)–N(10)  | 118.1(2) |
| C(a6)–N(3)–Co(1) | 127.71(17) | C(27)–C(26)–C(25)  | 119.8(3) |
| C(a5)–N(3)–Co(1) | 127.40(17) | C(27)–C(26)–H(26a) | 120.1    |
| C(a7)–N(4)–C(a8) | 105.2(2)   | C(25)–C(26)–H(26a) | 120.1    |
| C(a7)–N(4)–Co(1) | 127.48(16) | C(28)–C(27)–C(26)  | 120.8(3) |
| C(a8)–N(4)–Co(1) | 127.27(17) | C(28)–C(27)–H(27a) | 119.6    |
| C(1)–N(5)–C(3)   | 105.8(2)   | C(26)–C(27)–H(27a) | 119.6    |
| C(1)–N(5)–Co(1)  | 127.27(19) | C(27)–C(28)–C(29)  | 119.2(3) |
| C(3)–N(5)–Co(1)  | 126.7(2)   | C(27)–C(28)–H(28a) | 120.4    |
| C(2)–N(6)–C(1)   | 108.6(3)   | C(29)–C(28)–H(28a) | 120.4    |

**Table S4.** Continued

| angle              | degree   | angle               | degree   |
|--------------------|----------|---------------------|----------|
| C(2)–N(6)–C(4)     | 128.3(3) | C(24)–C(29)–C(28)   | 121.5(3) |
| C(1)–N(6)–C(4)     | 122.8(3) | C(24)–C(29)–H(29a)  | 119.3    |
| C(30)–N(7)–C(7)    | 129.5(2) | C(28)–C(29)–H(29a)  | 119.3    |
| C(30)–N(7)–H(7a)   | 115.3    | O(3)–C(30)–N(7)     | 122.9(3) |
| C(7)–N(7)–H(7a)    | 115.3    | O(3)–C(30)–C(31)    | 121.0(3) |
| C(35)–N(8)–C(13)   | 127.4(3) | N(7)–C(30)–C(31)    | 116.1(2) |
| C(35)–N(8)–H(8a)   | 116.3    | C(34)–C(31)–C(33)   | 110.1(3) |
| C(13)–N(8)–H(8a)   | 116.3    | C(34)–C(31)–C(32)   | 109.0(3) |
| C(40)–N(9)–C(19)   | 131.1(2) | C(33)–C(31)–C(32)   | 109.1(3) |
| C(40)–N(9)–H(9a)   | 114.4    | C(34)–C(31)–C(30)   | 114.5(3) |
| C(19)–N(9)–H(9a)   | 114.4    | C(33)–C(31)–C(30)   | 107.5(2) |
| C(45)–N(10)–C(25)  | 126.8(2) | C(32)–C(31)–C(30)   | 106.5(2) |
| C(45)–N(10)–H(10a) | 116.6    | C(31)–C(32)–H(32a)  | 109.5    |
| C(25)–N(10)–H(10a) | 116.6    | C(31)–C(32)–H(32b)  | 109.5    |
| N(1)–C(a1)–C(m4)   | 125.8(2) | H(32a)–C(32)–H(32b) | 109.5    |
| N(1)–C(a1)–C(b1)   | 110.5(2) | C(31)–C(32)–H(32C)  | 109.5    |
| C(m4)–C(a1)–C(b1)  | 123.7(2) | H(32a)–C(32)–H(32C) | 109.5    |
| N(1)–C(a2)–C(m1)   | 125.4(2) | H(32b)–C(32)–H(32C) | 109.5    |
| N(1)–C(a2)–C(b2)   | 110.8(2) | C(31)–C(33)–H(33a)  | 109.5    |
| C(m1)–C(a2)–C(b2)  | 123.8(2) | C(31)–C(33)–H(33b)  | 109.5    |
| N(2)–C(a3)–C(m1)   | 125.4(2) | H(33a)–C(33)–H(33b) | 109.5    |
| N(2)–C(a3)–C(b3)   | 110.5(2) | C(31)–C(33)–H(33C)  | 109.5    |
| C(m1)–C(a3)–C(b3)  | 124.0(2) | H(33a)–C(33)–H(33C) | 109.5    |
| N(2)–C(a4)–C(m2)   | 125.9(2) | H(33b)–C(33)–H(33C) | 109.5    |
| N(2)–C(a4)–C(b4)   | 110.4(2) | C(31)–C(34)–H(34a)  | 109.5    |
| C(m2)–C(a4)–C(b4)  | 123.7(2) | C(31)–C(34)–H(34b)  | 109.5    |
| N(3)–C(a5)–C(m2)   | 125.5(2) | H(34a)–C(34)–H(34b) | 109.5    |
| N(3)–C(a5)–C(b5)   | 110.6(2) | C(31)–C(34)–H(34C)  | 109.5    |
| C(m2)–C(a5)–C(b5)  | 123.8(2) | H(34a)–C(34)–H(34C) | 109.5    |
| N(3)–C(a6)–C(m3)   | 125.6(2) | H(34b)–C(34)–H(34C) | 109.5    |
| N(3)–C(a6)–C(b6)   | 110.7(2) | O(4)–C(35)–N(8)     | 123.0(3) |
| C(m3)–C(a6)–C(b6)  | 123.7(2) | O(4)–C(35)–C(36)    | 121.9(3) |
| N(4)–C(a7)–C(m3)   | 125.8(2) | N(8)–C(35)–C(36)    | 115.1(3) |
| N(4)–C(a7)–C(b7)   | 110.6(2) | C(35)–C(36)–C(39)   | 108.3(3) |

**Table S4.** Continued

| angle             | degree   | angle               | degree   |
|-------------------|----------|---------------------|----------|
| C(m3)–C(a7)–C(b7) | 123.5(2) | C(35)–C(36)–C(38)   | 110.2(2) |
| N(4)–C(a8)–C(m4)  | 126.5(2) | C(39)–C(36)–C(38)   | 112.0(3) |
| N(4)–C(a8)–C(b8)  | 110.2(2) | C(35)–C(36)–C(37)   | 108.3(3) |
| C(m4)–C(a8)–C(b8) | 123.3(2) | C(39)–C(36)–C(37)   | 109.7(3) |
| C(b2)–C(b1)–C(a1) | 106.7(2) | C(38)–C(36)–C(37)   | 108.4(3) |
| C(b2)–C(b1)–H(ba) | 126.6    | C(36)–C(37)–H(37a)  | 109.5    |
| C(a1)–C(b1)–H(ba) | 126.6    | C(36)–C(37)–H(37b)  | 109.5    |
| C(b1)–C(b2)–C(a2) | 107.3(2) | H(37a)–C(37)–H(37b) | 109.5    |
| C(b1)–C(b2)–H(bb) | 126.4    | C(36)–C(37)–H(37C)  | 109.5    |
| C(a2)–C(b2)–H(bb) | 126.4    | H(37a)–C(37)–H(37C) | 109.5    |
| C(b4)–C(b3)–C(a3) | 107.0(2) | H(37b)–C(37)–H(37C) | 109.5    |
| C(b4)–C(b3)–H(bC) | 126.5    | C(36)–C(38)–H(38a)  | 109.5    |
| C(a3)–C(b3)–H(bC) | 126.5    | C(36)–C(38)–H(38b)  | 109.5    |
| C(b3)–C(b4)–C(a4) | 107.1(2) | H(38a)–C(38)–H(38b) | 109.5    |
| C(b3)–C(b4)–H(bd) | 126.5    | C(36)–C(38)–H(38C)  | 109.5    |
| C(a4)–C(b4)–H(bd) | 126.5    | H(38a)–C(38)–H(38C) | 109.5    |
| C(b6)–C(b5)–C(a5) | 106.8(2) | H(38b)–C(38)–H(38C) | 109.5    |
| C(b6)–C(b5)–H(be) | 126.6    | C(36)–C(39)–H(39a)  | 109.5    |
| C(a5)–C(b5)–H(be) | 126.6    | C(36)–C(39)–H(39b)  | 109.5    |
| C(b5)–C(b6)–C(a6) | 107.0(2) | H(39a)–C(39)–H(39b) | 109.5    |
| C(b5)–C(b6)–H(bF) | 126.5    | C(36)–C(39)–H(39C)  | 109.5    |
| C(a6)–C(b6)–H(bF) | 126.5    | H(39a)–C(39)–H(39C) | 109.5    |
| C(b8)–C(b7)–C(a7) | 106.6(2) | H(39b)–C(39)–H(39C) | 109.5    |
| C(b8)–C(b7)–H(bg) | 126.7    | O(5)–C(40)–N(9)     | 123.3(3) |
| C(a7)–C(b7)–H(bg) | 126.7    | O(5)–C(40)–C(41)    | 121.8(3) |
| C(b7)–C(b8)–C(a8) | 107.3(2) | N(9)–C(40)–C(41)    | 114.9(2) |
| C(b7)–C(b8)–H(bH) | 126.3    | C(43)–C(41)–C(42)   | 110.3(2) |
| C(a8)–C(b8)–H(bH) | 126.3    | C(43)–C(41)–C(44)   | 109.8(2) |
| C(a3)–C(m1)–C(a2) | 123.5(2) | C(42)–C(41)–C(44)   | 108.9(2) |
| C(a3)–C(m1)–C(6)  | 118.8(2) | C(43)–C(41)–C(40)   | 106.3(2) |
| C(a2)–C(m1)–C(6)  | 117.6(2) | C(42)–C(41)–C(40)   | 107.7(2) |
| C(a4)–C(m2)–C(a5) | 123.6(2) | C(44)–C(41)–C(40)   | 113.8(2) |
| C(a4)–C(m2)–C(12) | 118.1(2) | C(41)–C(42)–H(42a)  | 109.5    |
| C(a5)–C(m2)–C(12) | 118.1(2) | C(41)–C(42)–H(42b)  | 109.5    |

**Table S4.** Continued

| angle             | degree   | angle               | degree   |
|-------------------|----------|---------------------|----------|
| C(a6)–C(m3)–C(a7) | 123.0(2) | H(42a)–C(42)–H(42b) | 109.5    |
| C(a6)–C(m3)–C(18) | 119.0(2) | C(41)–C(42)–H(42C)  | 109.5    |
| C(a7)–C(m3)–C(18) | 117.8(2) | H(42a)–C(42)–H(42C) | 109.5    |
| C(a8)–C(m4)–C(a1) | 122.8(2) | H(42b)–C(42)–H(42C) | 109.5    |
| C(a8)–C(m4)–C(24) | 119.5(2) | C(41)–C(43)–H(43a)  | 109.5    |
| C(a1)–C(m4)–C(24) | 117.7(2) | C(41)–C(43)–H(43b)  | 109.5    |
| N(5)–C(1)–N(6)    | 110.0(3) | H(43a)–C(43)–H(43b) | 109.5    |
| N(5)–C(1)–H(1a)   | 125.0    | C(41)–C(43)–H(43C)  | 109.5    |
| N(6)–C(1)–H(1a)   | 125.0    | H(43a)–C(43)–H(43C) | 109.5    |
| N(6)–C(2)–C(3)    | 106.1(3) | H(43b)–C(43)–H(43C) | 109.5    |
| N(6)–C(2)–H(2a)   | 127.0    | C(41)–C(44)–H(44a)  | 109.5    |
| C(3)–C(2)–H(2a)   | 127.0    | C(41)–C(44)–H(44b)  | 109.5    |
| C(2)–C(3)–N(5)    | 109.6(3) | H(44a)–C(44)–H(44b) | 109.5    |
| C(2)–C(3)–H(3a)   | 125.2    | C(41)–C(44)–H(44C)  | 109.5    |
| N(5)–C(3)–H(3a)   | 125.2    | H(44a)–C(44)–H(44C) | 109.5    |
| N(6)–C(4)–C(5)    | 111.2(3) | H(44b)–C(44)–H(44C) | 109.5    |
| N(6)–C(4)–H(4a)   | 109.4    | O(6)–C(45)–N(10)    | 123.1(3) |
| C(5)–C(4)–H(4a)   | 109.4    | O(6)–C(45)–C(46)    | 120.5(3) |
| N(6)–C(4)–H(4b)   | 109.4    | N(10)–C(45)–C(46)   | 116.4(2) |
| C(5)–C(4)–H(4b)   | 109.4    | C(49)–C(46)–C(47)   | 111.2(3) |
| H(4a)–C(4)–H(4b)  | 108.0    | C(49)–C(46)–C(45)   | 114.0(3) |
| C(4)–C(5)–H(5a)   | 109.5    | C(47)–C(46)–C(45)   | 106.1(2) |
| C(4)–C(5)–H(5b)   | 109.5    | C(49)–C(46)–C(48)   | 109.2(3) |
| H(5a)–C(5)–H(5b)  | 109.5    | C(47)–C(46)–C(48)   | 108.8(3) |
| C(4)–C(5)–H(5C)   | 109.5    | C(45)–C(46)–C(48)   | 107.3(2) |
| H(5a)–C(5)–H(5C)  | 109.5    | C(46)–C(47)–H(47a)  | 109.5    |
| H(5b)–C(5)–H(5C)  | 109.5    | C(46)–C(47)–H(47b)  | 109.5    |
| C(11)–C(6)–C(7)   | 119.2(2) | H(47a)–C(47)–H(47b) | 109.5    |
| C(11)–C(6)–C(m1)  | 121.1(2) | C(46)–C(47)–H(47C)  | 109.5    |
| C(7)–C(6)–C(m1)   | 119.7(2) | H(47a)–C(47)–H(47C) | 109.5    |
| C(8)–C(7)–N(7)    | 123.0(3) | H(47b)–C(47)–H(47C) | 109.5    |
| C(8)–C(7)–C(6)    | 119.9(3) | C(46)–C(48)–H(48a)  | 109.5    |
| N(7)–C(7)–C(6)    | 117.1(2) | C(46)–C(48)–H(48b)  | 109.5    |
| C(9)–C(8)–C(7)    | 119.4(3) | H(48a)–C(48)–H(48b) | 109.5    |



**Table S4.** Continued

| angle              | degree   | angle               | degree   |
|--------------------|----------|---------------------|----------|
| C(9)–C(8)–H(8b)    | 120.3    | C(46)–C(48)–H(48C)  | 109.5    |
| C(7)–C(8)–H(8b)    | 120.3    | H(48a)–C(48)–H(48C) | 109.5    |
| C(10)–C(9)–C(8)    | 121.5(3) | H(48b)–C(48)–H(48C) | 109.5    |
| C(10)–C(9)–H(9b)   | 119.2    | C(46)–C(49)–H(49a)  | 109.5    |
| C(8)–C(9)–H(9b)    | 119.2    | C(46)–C(49)–H(49b)  | 109.5    |
| C(9)–C(10)–C(11)   | 119.0(3) | H(49a)–C(49)–H(49b) | 109.5    |
| C(9)–C(10)–H(10b)  | 120.5    | C(46)–C(49)–H(49C)  | 109.5    |
| C(11)–C(10)–H(10b) | 120.5    | H(49a)–C(49)–H(49C) | 109.5    |
| C(6)–C(11)–C(10)   | 121.0(3) | H(49b)–C(49)–H(49C) | 109.5    |
| C(6)–C(11)–H(11a)  | 119.5    | C(2S)–C(1S)–C(6S)   | 119.9(3) |
| C(10)–C(11)–H(11a) | 119.5    | C(2S)–C(1S)–H(1Sa)  | 120.0    |
| C(17)–C(12)–C(13)  | 118.4(2) | C(6S)–C(1S)–H(1Sa)  | 120.0    |
| C(17)–C(12)–C(m2)  | 119.2(3) | C(1S)–C(2S)–C(3S)   | 120.1(4) |
| C(13)–C(12)–C(m2)  | 122.4(2) | C(1S)–C(2S)–H(2Sa)  | 120.0    |
| C(14)–C(13)–C(12)  | 119.9(3) | C(3S)–C(2S)–H(2Sa)  | 120.0    |
| C(14)–C(13)–N(8)   | 122.8(3) | C(4S)–C(3S)–C(2S)   | 120.0(4) |
| C(12)–C(13)–N(8)   | 117.3(2) | C(4S)–C(3S)–H(3Sa)  | 120.0    |
| C(15)–C(14)–C(13)  | 120.0(3) | C(2S)–C(3S)–H(3Sa)  | 120.0    |
| C(15)–C(14)–H(14a) | 120.0    | C(3S)–C(4S)–C(5S)   | 120.2(3) |
| C(13)–C(14)–H(14a) | 120.0    | C(3S)–C(4S)–H(4Sa)  | 119.9    |
| C(16)–C(15)–C(14)  | 120.8(3) | C(5S)–C(4S)–H(4Sa)  | 119.9    |
| C(16)–C(15)–H(15a) | 119.6    | C(4S)–C(5S)–C(6S)   | 119.7(4) |
| C(14)–C(15)–H(15a) | 119.6    | C(4S)–C(5S)–H(5Sa)  | 120.2    |
| C(15)–C(16)–C(17)  | 119.7(3) | C(6S)–C(5S)–H(5Sa)  | 120.2    |
| C(15)–C(16)–H(16a) | 120.2    | C(1S)–C(6S)–C(5S)   | 120.2(4) |
| C(17)–C(16)–H(16a) | 120.2    | C(1S)–C(6S)–H(6Sa)  | 119.9    |
| C(16)–C(17)–C(12)  | 121.1(3) | C(5S)–C(6S)–H(6Sa)  | 119.9    |
| C(16)–C(17)–H(17a) | 119.4    |                     |          |

<sup>a</sup>The estimated standard deviations of the least significant digits are given in parentheses.

**Table S5.** Anisotropic Displacement Parameters ( $\text{\AA}^2$ ) for  $[\text{Co}(\text{TpivPP})(1\text{-EtIm})(\text{O}_2)]\cdot\text{C}_6\text{H}_6$  (100 K,  $P\bar{1}$  form)<sup>a</sup>

| atom  | $U_{11}$   | $U_{22}$   | $U_{33}$   | $U_{23}$    | $U_{13}$    | $U_{12}$    |
|-------|------------|------------|------------|-------------|-------------|-------------|
| Co(1) | 0.0156(2)  | 0.0147(2)  | 0.0122(2)  | -0.0005(1)  | 0.0001(1)   | 0.0003(1)   |
| O(1)  | 0.0288(12) | 0.0239(11) | 0.0223(10) | -0.0028(9)  | 0.0028(9)   | -0.0075(8)  |
| O(2A) | 0.0398(16) | 0.0196(15) | 0.0327(15) | 0.0045(11)  | -0.0024(12) | -0.0072(11) |
| O(2B) | 0.022(7)   | 0.047(9)   | 0.043(8)   | 0.000(6)    | -0.014(5)   | -0.005(5)   |
| O(3)  | 0.0481(14) | 0.0429(14) | 0.0161(10) | -0.0026(10) | 0.0049(9)   | -0.0101(11) |
| O(4)  | 0.0481(14) | 0.0259(12) | 0.0489(14) | 0.0061(11)  | -0.0006(11) | 0.0071(11)  |
| O(5)  | 0.0407(13) | 0.0446(14) | 0.0198(10) | -0.0118(10) | 0.0022(9)   | -0.0110(11) |
| O(6)  | 0.0225(10) | 0.0347(13) | 0.0358(12) | -0.0007(10) | 0.0002(9)   | 0.0057(9)   |
| N(1)  | 0.0168(10) | 0.0160(11) | 0.0132(10) | -0.0009(8)  | -0.0020(8)  | -0.0002(8)  |
| N(2)  | 0.0165(10) | 0.0143(11) | 0.0149(10) | -0.0010(8)  | 0.0012(8)   | -0.0005(8)  |
| N(3)  | 0.0173(10) | 0.0186(12) | 0.0141(10) | -0.0001(9)  | 0.0026(8)   | 0.0009(9)   |
| N(4)  | 0.0153(10) | 0.0154(11) | 0.0155(10) | 0.0012(9)   | -0.0017(8)  | 0.0003(8)   |
| N(5)  | 0.0205(11) | 0.0200(12) | 0.0177(10) | 0.0045(9)   | -0.0054(9)  | -0.0014(8)  |
| N(6)  | 0.0239(12) | 0.0184(12) | 0.0333(14) | 0.0038(10)  | -0.0079(10) | -0.0034(9)  |
| N(7)  | 0.0281(12) | 0.0336(14) | 0.0119(10) | -0.0076(10) | 0.0011(9)   | -0.0066(11) |
| N(8)  | 0.0299(13) | 0.0230(13) | 0.0407(15) | 0.0096(12)  | -0.0036(11) | 0.0034(11)  |
| N(9)  | 0.0314(13) | 0.0309(14) | 0.0099(10) | -0.0032(10) | 0.0042(9)   | -0.0050(11) |
| N(10) | 0.0201(11) | 0.0235(13) | 0.0334(13) | -0.0040(11) | -0.0050(10) | 0.0050(10)  |
| C(A1) | 0.0164(12) | 0.0166(13) | 0.0183(12) | -0.0009(10) | 0.0004(10)  | 0.0000(10)  |
| C(A2) | 0.0210(13) | 0.0184(14) | 0.0158(12) | -0.0064(10) | 0.0007(10)  | 0.0009(10)  |
| C(A3) | 0.0191(12) | 0.0178(13) | 0.0145(12) | -0.0037(10) | -0.0004(10) | -0.0034(10) |
| C(A4) | 0.0165(12) | 0.0197(14) | 0.0145(12) | 0.0014(10)  | -0.0016(10) | -0.0019(10) |
| C(A5) | 0.0177(12) | 0.0198(14) | 0.0153(12) | -0.0005(10) | 0.0010(10)  | 0.0005(10)  |
| C(A6) | 0.0185(12) | 0.0194(14) | 0.0143(12) | -0.0011(10) | 0.0016(10)  | -0.0006(10) |
| C(A7) | 0.0179(12) | 0.0200(14) | 0.0129(12) | 0.0002(10)  | -0.0018(10) | -0.0018(10) |
| C(A8) | 0.0175(12) | 0.0189(14) | 0.0176(12) | 0.0007(10)  | -0.0022(10) | -0.0021(10) |
| C(B1) | 0.0255(14) | 0.0185(14) | 0.0200(13) | -0.0026(11) | 0.0005(11)  | 0.0043(11)  |
| C(B2) | 0.0236(13) | 0.0215(14) | 0.0189(13) | -0.0051(11) | 0.0003(11)  | 0.0039(11)  |
| C(B3) | 0.0236(13) | 0.0217(14) | 0.0140(12) | 0.0000(11)  | -0.0015(10) | 0.0000(11)  |
| C(B4) | 0.0252(14) | 0.0238(15) | 0.0141(12) | 0.0023(11)  | -0.0019(10) | 0.0019(11)  |
| C(B5) | 0.0251(14) | 0.0210(15) | 0.0188(13) | -0.0018(11) | 0.0017(11)  | 0.0069(11)  |
| C(B6) | 0.0242(14) | 0.0236(15) | 0.0180(13) | -0.0010(11) | 0.0040(11)  | 0.0057(11)  |
| C(B7) | 0.0228(13) | 0.0226(14) | 0.0146(12) | -0.0003(11) | -0.0015(10) | 0.0006(11)  |
| C(B8) | 0.0225(13) | 0.0245(15) | 0.0175(13) | 0.0013(11)  | -0.0062(11) | 0.0019(11)  |

**Table S5.** Continued

| atom  | $U_{11}$   | $U_{22}$   | $U_{33}$   | $U_{23}$    | $U_{13}$    | $U_{12}$    |
|-------|------------|------------|------------|-------------|-------------|-------------|
| C(M1) | 0.0206(13) | 0.0207(14) | 0.0135(12) | -0.0052(10) | -0.0010(10) | -0.0013(11) |
| C(M2) | 0.0177(12) | 0.0169(13) | 0.0182(12) | 0.0008(10)  | -0.0006(10) | 0.0004(10)  |
| C(M3) | 0.0182(12) | 0.0196(14) | 0.0135(12) | -0.0006(10) | 0.0010(10)  | -0.0022(10) |
| C(M4) | 0.0178(12) | 0.0175(13) | 0.0189(13) | 0.0003(10)  | -0.0028(10) | -0.0018(10) |
| C(1)  | 0.0280(15) | 0.0238(15) | 0.0230(14) | 0.0049(12)  | -0.0056(11) | -0.0012(12) |
| C(2)  | 0.0251(14) | 0.0312(16) | 0.0227(14) | 0.0013(12)  | -0.0018(11) | -0.0041(12) |
| C(3)  | 0.0246(14) | 0.0282(16) | 0.0238(14) | 0.0051(12)  | -0.0024(11) | -0.0057(12) |
| C(4)  | 0.0335(16) | 0.0257(16) | 0.0349(16) | -0.0101(13) | -0.0071(13) | -0.0018(12) |
| C(5)  | 0.048(2)   | 0.0306(19) | 0.053(2)   | 0.0026(17)  | -0.0171(17) | -0.0167(15) |
| C(6)  | 0.0225(13) | 0.0184(14) | 0.0155(12) | -0.0027(10) | -0.0027(10) | 0.0046(11)  |
| C(7)  | 0.0243(13) | 0.0232(15) | 0.0164(12) | -0.0061(11) | -0.0034(10) | 0.0033(11)  |
| C(8)  | 0.0280(14) | 0.0309(16) | 0.0158(13) | -0.0052(12) | 0.0006(11)  | 0.0053(12)  |
| C(9)  | 0.0373(16) | 0.0266(16) | 0.0169(13) | -0.0095(12) | -0.0039(12) | 0.0129(13)  |
| C(10) | 0.0334(16) | 0.0219(15) | 0.0245(14) | -0.0098(12) | -0.0108(12) | 0.0052(12)  |
| C(11) | 0.0272(14) | 0.0233(15) | 0.0204(13) | -0.0038(12) | -0.0048(11) | 0.0022(12)  |
| C(12) | 0.0224(13) | 0.0224(14) | 0.0114(11) | -0.0034(10) | -0.0013(10) | 0.0054(11)  |
| C(13) | 0.0266(14) | 0.0247(15) | 0.0218(14) | 0.0016(12)  | -0.0042(11) | 0.0069(12)  |
| C(14) | 0.0412(18) | 0.0298(17) | 0.0308(16) | 0.0057(14)  | -0.0086(14) | 0.0094(15)  |
| C(15) | 0.0318(16) | 0.048(2)   | 0.0300(16) | -0.0041(15) | -0.0120(13) | 0.0193(15)  |
| C(16) | 0.0250(15) | 0.049(2)   | 0.0278(16) | -0.0093(15) | -0.0084(12) | 0.0080(14)  |
| C(17) | 0.0237(14) | 0.0342(17) | 0.0200(13) | -0.0055(12) | -0.0018(11) | 0.0031(12)  |
| C(18) | 0.0190(12) | 0.0243(15) | 0.0144(12) | 0.0026(11)  | 0.0020(10)  | 0.0063(11)  |
| C(19) | 0.0227(13) | 0.0219(14) | 0.0132(12) | 0.0003(11)  | 0.0012(10)  | 0.0049(11)  |
| C(20) | 0.0265(14) | 0.0284(16) | 0.0150(13) | -0.0020(11) | 0.0023(11)  | 0.0074(12)  |
| C(21) | 0.0286(15) | 0.0370(18) | 0.0132(12) | 0.0028(12)  | 0.0065(11)  | 0.0097(13)  |
| C(22) | 0.0246(14) | 0.0362(18) | 0.0200(14) | 0.0092(12)  | 0.0074(11)  | 0.0069(13)  |
| C(23) | 0.0237(14) | 0.0259(15) | 0.0206(13) | 0.0024(12)  | 0.0002(11)  | -0.0001(12) |
| C(24) | 0.0203(13) | 0.0230(14) | 0.0171(12) | 0.0022(11)  | 0.0008(10)  | 0.0055(11)  |
| C(25) | 0.0247(14) | 0.0249(15) | 0.0186(13) | -0.0016(11) | -0.0012(11) | 0.0046(12)  |
| C(26) | 0.0274(15) | 0.0308(17) | 0.0284(15) | 0.0030(13)  | -0.0051(12) | 0.0050(13)  |
| C(27) | 0.0355(16) | 0.0268(16) | 0.0280(15) | 0.0084(13)  | -0.0001(13) | 0.0138(13)  |
| C(28) | 0.0363(17) | 0.0218(15) | 0.0321(16) | 0.0052(13)  | 0.0060(13)  | 0.0037(13)  |
| C(29) | 0.0245(14) | 0.0258(15) | 0.0236(14) | 0.0037(12)  | 0.0022(11)  | 0.0019(12)  |
| C(30) | 0.0278(14) | 0.0254(15) | 0.0167(13) | -0.0017(11) | 0.0001(11)  | 0.0050(12)  |

**Table S5.** Continued

| atom  | $U_{11}$   | $U_{22}$   | $U_{33}$   | $U_{23}$    | $U_{13}$    | $U_{12}$    |
|-------|------------|------------|------------|-------------|-------------|-------------|
| C(31) | 0.0256(14) | 0.0250(15) | 0.0190(13) | -0.0014(11) | -0.0013(11) | -0.0014(12) |
| C(32) | 0.0316(16) | 0.0353(19) | 0.0430(19) | -0.0140(15) | -0.0109(14) | 0.0083(14)  |
| C(33) | 0.0449(19) | 0.0312(18) | 0.0328(17) | -0.0107(14) | -0.0134(14) | 0.0128(15)  |
| C(34) | 0.064(2)   | 0.054(2)   | 0.0173(15) | -0.0043(15) | -0.0052(15) | -0.0235(19) |
| C(35) | 0.0375(16) | 0.0229(15) | 0.0197(14) | 0.0011(12)  | 0.0074(12)  | 0.0004(13)  |
| C(36) | 0.0414(17) | 0.0245(16) | 0.0211(14) | 0.0012(12)  | 0.0041(12)  | -0.0052(13) |
| C(37) | 0.047(2)   | 0.0318(19) | 0.046(2)   | 0.0005(16)  | 0.0053(16)  | -0.0056(15) |
| C(38) | 0.0383(17) | 0.0389(19) | 0.0255(15) | -0.0002(14) | 0.0039(13)  | 0.0002(14)  |
| C(39) | 0.0336(17) | 0.044(2)   | 0.0307(16) | -0.0094(15) | 0.0047(13)  | 0.0012(15)  |
| C(40) | 0.0197(13) | 0.0219(14) | 0.0182(13) | -0.0034(11) | -0.0029(10) | 0.0050(11)  |
| C(41) | 0.0203(13) | 0.0208(14) | 0.0182(12) | 0.0007(11)  | -0.0006(10) | -0.0001(11) |
| C(42) | 0.0228(14) | 0.0336(17) | 0.0268(15) | 0.0003(13)  | -0.0043(11) | 0.0009(12)  |
| C(43) | 0.0264(14) | 0.0246(15) | 0.0324(16) | 0.0050(13)  | 0.0004(12)  | 0.0030(12)  |
| C(44) | 0.0291(14) | 0.0279(16) | 0.0198(13) | -0.0011(12) | 0.0050(11)  | -0.0075(12) |
| C(45) | 0.0250(14) | 0.0278(15) | 0.0137(12) | -0.0030(11) | 0.0007(10)  | 0.0023(12)  |
| C(46) | 0.0268(14) | 0.0284(16) | 0.0197(13) | -0.0052(12) | 0.0018(11)  | -0.0017(12) |
| C(47) | 0.0383(17) | 0.0361(18) | 0.0264(15) | 0.0007(13)  | 0.0063(13)  | 0.0068(14)  |
| C(48) | 0.054(2)   | 0.0348(19) | 0.0313(17) | -0.0065(14) | -0.0096(15) | -0.0050(16) |
| C(49) | 0.0409(18) | 0.0259(17) | 0.0363(17) | -0.0036(14) | 0.0136(14)  | 0.0083(13)  |
| C(1S) | 0.0440(19) | 0.043(2)   | 0.0275(16) | 0.0017(15)  | -0.0029(14) | 0.0110(16)  |
| C(2S) | 0.0378(18) | 0.044(2)   | 0.0349(18) | -0.0097(16) | -0.0025(15) | 0.0042(16)  |
| C(3S) | 0.0393(18) | 0.0333(19) | 0.0388(18) | -0.0006(15) | 0.0052(15)  | 0.0024(15)  |
| C(4S) | 0.0318(16) | 0.040(2)   | 0.0302(16) | 0.0027(14)  | 0.0012(13)  | 0.0067(14)  |
| C(5S) | 0.0311(16) | 0.040(2)   | 0.0380(18) | -0.0028(16) | 0.0037(14)  | 0.0024(14)  |
| C(6S) | 0.045(2)   | 0.037(2)   | 0.0351(18) | 0.0037(15)  | 0.0053(15)  | 0.0018(16)  |

<sup>a</sup>The estimated standard deviations of the least significant digits are given in parentheses. The anisotropic displacement factor exponent takes the form:  $-2 \pi [h^2 U_{11} + \dots + 2 h k a^* b^* U_{12}]$ .

**Table S6.** Hydrogen Atom Coordinates and Equivalent Isotropic Displacement Parameters ( $\text{\AA}^2$ ) for  $[\text{Co}(\text{TpivPP})(1\text{-EtIm})(\text{O}_2)]\cdot\text{C}_6\text{H}_6$  (100K,  $P\bar{1}$  form)<sup>a</sup>

| atom   | $x$    | $y$    | $z$    | $U(\text{eq})$ |
|--------|--------|--------|--------|----------------|
| H(7A)  | 0.6435 | 0.8681 | 0.9478 | 0.029          |
| H(8A)  | 0.9295 | 0.5393 | 0.8503 | 0.038          |
| H(9A)  | 0.8530 | 0.6585 | 0.5453 | 0.029          |
| H(10A) | 0.5491 | 0.9317 | 0.6175 | 0.031          |
| H(BA)  | 0.5804 | 1.1193 | 0.7967 | 0.026          |
| H(BB)  | 0.6469 | 1.0767 | 0.9191 | 0.026          |
| H(BC)  | 0.9179 | 0.8185 | 1.0201 | 0.024          |
| H(BD)  | 1.0287 | 0.6876 | 0.9644 | 0.025          |
| H(BE)  | 1.1223 | 0.5779 | 0.6945 | 0.026          |
| H(BF)  | 1.0792 | 0.6420 | 0.5707 | 0.027          |
| H(BG)  | 0.8250 | 0.9166 | 0.4695 | 0.024          |
| H(BH)  | 0.6920 | 1.0269 | 0.5261 | 0.026          |
| H(1A)  | 0.9409 | 1.0560 | 0.8209 | 0.030          |
| H(2A)  | 1.1902 | 1.0451 | 0.6899 | 0.032          |
| H(3A)  | 1.0783 | 0.9098 | 0.6579 | 0.031          |
| H(4A)  | 1.1409 | 1.1359 | 0.8574 | 0.037          |
| H(4B)  | 1.0588 | 1.2100 | 0.8207 | 0.037          |
| H(5A)  | 1.2257 | 1.2680 | 0.7987 | 0.065          |
| H(5B)  | 1.1765 | 1.2415 | 0.7224 | 0.065          |
| H(5C)  | 1.2584 | 1.1671 | 0.7587 | 0.065          |
| H(8B)  | 0.6087 | 0.9433 | 1.1294 | 0.030          |
| H(9B)  | 0.7129 | 1.0546 | 1.1854 | 0.033          |
| H(10B) | 0.8578 | 1.1133 | 1.1251 | 0.032          |
| H(11A) | 0.9004 | 1.0589 | 1.0065 | 0.028          |
| H(14A) | 1.1298 | 0.3863 | 0.9129 | 0.041          |
| H(15A) | 1.2999 | 0.4293 | 0.9134 | 0.044          |
| H(16A) | 1.3494 | 0.5806 | 0.8666 | 0.041          |
| H(17A) | 1.2270 | 0.6940 | 0.8243 | 0.031          |
| H(20A) | 0.9267 | 0.6233 | 0.3600 | 0.028          |
| H(21A) | 1.0414 | 0.7246 | 0.2971 | 0.032          |
| H(22A) | 1.1128 | 0.8565 | 0.3542 | 0.033          |
| H(23A) | 1.0688 | 0.8891 | 0.4774 | 0.028          |
| H(26A) | 0.3832 | 1.1274 | 0.5777 | 0.035          |
| H(27A) | 0.4187 | 1.2936 | 0.5894 | 0.037          |

**Table S6.** Continued

| atom   | $x$    | $y$    | $z$    | $U(\text{eq})$ |
|--------|--------|--------|--------|----------------|
| H(28A) | 0.5709 | 1.3404 | 0.6399 | 0.036          |
| H(29A) | 0.6909 | 1.2197 | 0.6753 | 0.030          |
| H(32A) | 0.3749 | 0.7445 | 1.0281 | 0.055          |
| H(32B) | 0.3562 | 0.7216 | 0.9438 | 0.055          |
| H(32C) | 0.3749 | 0.8323 | 0.9686 | 0.055          |
| H(33A) | 0.5193 | 0.6203 | 1.0304 | 0.054          |
| H(33B) | 0.6104 | 0.6257 | 0.9704 | 0.054          |
| H(33C) | 0.4991 | 0.5955 | 0.9466 | 0.054          |
| H(34A) | 0.6098 | 0.7625 | 0.8761 | 0.067          |
| H(34B) | 0.5174 | 0.8426 | 0.8757 | 0.067          |
| H(34C) | 0.4989 | 0.7315 | 0.8518 | 0.067          |
| H(37A) | 0.8008 | 0.2579 | 0.9009 | 0.063          |
| H(37B) | 0.8302 | 0.2511 | 0.8154 | 0.063          |
| H(37C) | 0.7163 | 0.2830 | 0.8412 | 0.063          |
| H(38A) | 0.8176 | 0.5090 | 0.7742 | 0.052          |
| H(38B) | 0.7258 | 0.4353 | 0.7652 | 0.052          |
| H(38C) | 0.8393 | 0.4027 | 0.7388 | 0.052          |
| H(39A) | 0.7772 | 0.5203 | 0.9114 | 0.054          |
| H(39B) | 0.7729 | 0.4209 | 0.9596 | 0.054          |
| H(39C) | 0.6847 | 0.4473 | 0.9029 | 0.054          |
| H(42A) | 0.6264 | 0.4740 | 0.4739 | 0.042          |
| H(42B) | 0.5962 | 0.5795 | 0.5079 | 0.042          |
| H(42C) | 0.5849 | 0.4815 | 0.5570 | 0.042          |
| H(43A) | 0.7843 | 0.3821 | 0.5146 | 0.042          |
| H(43B) | 0.7437 | 0.3880 | 0.5980 | 0.042          |
| H(43C) | 0.8538 | 0.4283 | 0.5754 | 0.042          |
| H(44A) | 0.8034 | 0.5909 | 0.6307 | 0.038          |
| H(44B) | 0.6921 | 0.5522 | 0.6520 | 0.038          |
| H(44C) | 0.7038 | 0.6506 | 0.6033 | 0.038          |
| H(47A) | 0.3999 | 0.8125 | 0.7364 | 0.051          |
| H(47B) | 0.3474 | 0.7196 | 0.7016 | 0.051          |
| H(47C) | 0.2879 | 0.8245 | 0.7039 | 0.051          |
| H(48A) | 0.3277 | 0.7116 | 0.5638 | 0.060          |
| H(48B) | 0.3559 | 0.8060 | 0.5146 | 0.060          |

**Table S6.** Continued

| atom   | $x$    | $y$    | $z$    | $U(\text{eq})$ |
|--------|--------|--------|--------|----------------|
| H(48C) | 0.2613 | 0.8122 | 0.5719 | 0.060          |
| H(49A) | 0.5522 | 0.7888 | 0.6493 | 0.052          |
| H(49B) | 0.5349 | 0.7869 | 0.5628 | 0.052          |
| H(49C) | 0.5003 | 0.6962 | 0.6137 | 0.052          |
| H(1SA) | 0.3634 | 0.5446 | 0.6634 | 0.046          |
| H(2SA) | 0.3119 | 0.3881 | 0.6995 | 0.047          |
| H(3SA) | 0.3995 | 0.3002 | 0.7907 | 0.045          |
| H(4SA) | 0.5385 | 0.3692 | 0.8455 | 0.041          |
| H(5SA) | 0.5892 | 0.5272 | 0.8107 | 0.044          |
| H(6SA) | 0.5028 | 0.6138 | 0.7184 | 0.047          |

<sup>a</sup> $U(\text{eq})$  is defined as one third of the trace of the orthogonalized  $\mathbf{U}_{ij}$  tensor. The estimated standard deviations of the least significant digits are given in parentheses.

## Supporting Information

**Table S7.** Complete Crystallographic Details for [Co(TpivPP)(1-EtIm)(O<sub>2</sub>)]·C<sub>6</sub>H<sub>6</sub> (100 K, C2/c form)

|                                                              |                                                                   |
|--------------------------------------------------------------|-------------------------------------------------------------------|
| formula                                                      | C <sub>75</sub> H <sub>78</sub> CoN <sub>10</sub> O <sub>6</sub>  |
| FW, amu                                                      | 1274.40                                                           |
| <i>a</i> , Å                                                 | 18.586(4)                                                         |
| <i>b</i> , Å                                                 | 19.170(4)                                                         |
| <i>c</i> , Å                                                 | 18.316(4)                                                         |
| $\beta$ , deg                                                | 90.25(3)                                                          |
| <i>V</i> , Å <sup>3</sup>                                    | 6526(2)                                                           |
| space group                                                  | C2/c                                                              |
| <i>Z</i>                                                     | 4                                                                 |
| D <sub>c</sub> , g/cm <sup>3</sup>                           | 1.297                                                             |
| F(000)                                                       | 2692                                                              |
| $\mu$ , mm <sup>-1</sup>                                     | 0.326                                                             |
| crystal dimensions, mm                                       | 0.39 × 0.26 × 0.19                                                |
| radiation                                                    | MoK $\alpha$ , $\bar{\lambda}$ = 0.71073 Å                        |
| temperature, K                                               | 100(2)                                                            |
| diffractometer                                               | Bruker Apex CCD                                                   |
| $\theta$ range for collected data, deg                       | 1.89–27.68                                                        |
| index range                                                  | –24 ≤ <i>h</i> ≤ 19<br>–16 ≤ <i>k</i> ≤ 25<br>–23 ≤ <i>l</i> ≤ 22 |
| total data collected                                         | 13615                                                             |
| absorption correction                                        | Semi-empirical from equiv                                         |
| relative transmission coefficients (I)                       | 0.9407 and 0.8835                                                 |
| unique data                                                  | 4875 ( <i>R</i> <sub>int</sub> = 0.0283)                          |
| unique observed data [ <i>I</i> > 2 $\sigma$ ( <i>I</i> )]   | 3157                                                              |
| refinement method                                            | Full-matrix least-squares on F <sup>2</sup>                       |
| data/restraints/parameters                                   | 4875/12/484                                                       |
| goodness-of-fit (pased on <i>F</i> <sup>2</sup> )            | 0.945                                                             |
| final <i>R</i> indices [ <i>I</i> > 2 $\sigma$ ( <i>I</i> )] | <i>R</i> <sub>1</sub> = 0.0477, <i>wR</i> <sub>2</sub> = 0.1139   |
| final <i>R</i> indices (all data)                            | <i>R</i> <sub>1</sub> = 0.0783, <i>wR</i> <sub>2</sub> = 0.1226   |



**Table S8.** Atomic Coordinates and Equivalent Isotropic Displacement Parameters ( $\text{\AA}^2$ ) for  $[\text{Co}(\text{TpivPP})(1\text{-EtIm})(\text{O}_2)]\cdot\text{C}_6\text{H}_6$  (100 K,  $C2/c$  form)<sup>a</sup>

| atom  | $x$         | $y$         | $z$         | $U(\text{eq})$ |
|-------|-------------|-------------|-------------|----------------|
| Co(1) | 0.5000      | 0.86334(2)  | 0.7500      | 0.0268(2)      |
| O(1)  | 0.5000      | 0.76431(12) | 0.7500      | 0.0446(7)      |
| O(2)  | 0.5405(2)   | 0.72887(18) | 0.7247(2)   | 0.0534(10)     |
| O(3)  | 0.63055(12) | 0.66644(11) | 1.08331(10) | 0.0500(5)      |
| O(4)  | 0.82864(11) | 0.65239(11) | 0.61533(13) | 0.0533(5)      |
| N(1)  | 0.59747(12) | 0.86157(10) | 0.79525(11) | 0.0320(5)      |
| N(2)  | 0.54424(11) | 0.86269(9)  | 0.65126(11) | 0.0292(5)      |
| N(5)  | 0.61142(14) | 0.74995(12) | 0.99830(11) | 0.0450(6)      |
| N(6)  | 0.74012(12) | 0.73249(11) | 0.62806(14) | 0.0447(6)      |
| C(a1) | 0.61427(15) | 0.86424(12) | 0.86755(14) | 0.0337(6)      |
| C(a2) | 0.66273(14) | 0.85608(11) | 0.75970(14) | 0.0321(5)      |
| C(a3) | 0.61532(14) | 0.85918(11) | 0.63473(13) | 0.0290(5)      |
| C(a4) | 0.50922(15) | 0.86732(11) | 0.58541(13) | 0.0318(6)      |
| C(b1) | 0.69079(16) | 0.85942(14) | 0.87851(15) | 0.0410(6)      |
| C(b2) | 0.72092(15) | 0.85373(14) | 0.81169(15) | 0.0386(6)      |
| C(b3) | 0.62589(16) | 0.86101(12) | 0.55637(14) | 0.0362(6)      |
| C(b4) | 0.56055(14) | 0.86636(12) | 0.52656(14) | 0.0339(6)      |
| C(m1) | 0.56457(14) | 0.86994(12) | 0.92512(13) | 0.0336(6)      |
| C(m2) | 0.67274(14) | 0.85534(11) | 0.68444(14) | 0.0317(5)      |
| C(6)  | 0.59367(14) | 0.87306(13) | 1.00195(13) | 0.0356(6)      |
| C(7)  | 0.61622(14) | 0.81257(13) | 1.03813(13) | 0.0366(6)      |
| C(8)  | 0.64254(15) | 0.81640(16) | 1.10890(14) | 0.0416(6)      |
| C(9)  | 0.64573(14) | 0.88046(17) | 1.14390(15) | 0.0435(7)      |
| C(10) | 0.62414(14) | 0.94084(16) | 1.10932(15) | 0.0424(7)      |
| C(11) | 0.59851(14) | 0.93718(15) | 1.03823(14) | 0.0381(6)      |
| C(12) | 0.61817(15) | 0.68297(13) | 1.02023(13) | 0.0376(6)      |
| C(13) | 0.74824(14) | 0.85517(12) | 0.65635(13) | 0.0323(5)      |
| C(14) | 0.78071(13) | 0.79492(14) | 0.62833(13) | 0.0365(6)      |
| C(15) | 0.85111(14) | 0.79761(16) | 0.60193(15) | 0.0455(7)      |
| C(16) | 0.88947(16) | 0.85862(15) | 0.60597(15) | 0.0474(7)      |
| C(17) | 0.85869(16) | 0.91868(16) | 0.63529(15) | 0.0488(7)      |
| C(18) | 0.78848(15) | 0.91605(14) | 0.65887(14) | 0.0402(6)      |
| C(19) | 0.76536(14) | 0.66651(14) | 0.62484(15) | 0.0404(6)      |
| C(20) | 0.6050(3)   | 0.6292(3)   | 0.9552(2)   | 0.0315(17)     |

**Table S8.** Continued

| atom   | <i>x</i>    | <i>y</i>    | <i>z</i>    | <i>U</i> (eq) |
|--------|-------------|-------------|-------------|---------------|
| C(21)  | 0.6797(2)   | 0.6026(3)   | 0.9401(4)   | 0.0408(18)    |
| C(22)  | 0.5729(5)   | 0.6585(2)   | 0.8860(2)   | 0.0365(17)    |
| C(23)  | 0.5587(3)   | 0.5702(6)   | 0.9824(7)   | 0.039(2)      |
| C(20b) | 0.6206(4)   | 0.6255(4)   | 0.9643(3)   | 0.032(2)      |
| C(21b) | 0.6842(3)   | 0.5781(5)   | 0.9765(5)   | 0.049(2)      |
| C(22b) | 0.6208(7)   | 0.6515(4)   | 0.8867(3)   | 0.056(3)      |
| C(23b) | 0.5521(3)   | 0.5856(9)   | 0.9782(8)   | 0.051(3)      |
| C(24)  | 0.70842(17) | 0.60818(16) | 0.62210(18) | 0.0296(13)    |
| C(25)  | 0.7162(2)   | 0.5761(3)   | 0.69686(17) | 0.0471(15)    |
| C(26)  | 0.7265(3)   | 0.5546(2)   | 0.5649(2)   | 0.0598(18)    |
| C(27)  | 0.6321(2)   | 0.6327(3)   | 0.6112(3)   | 0.0525(18)    |
| C(24b) | 0.71257(17) | 0.60771(14) | 0.64826(18) | 0.0309(18)    |
| C(25b) | 0.67725(17) | 0.61681(16) | 0.72155(19) | 0.0435(17)    |
| C(26b) | 0.75228(19) | 0.53919(13) | 0.6467(2)   | 0.0529(19)    |
| C(27b) | 0.6559(2)   | 0.60827(17) | 0.5891(2)   | 0.052(2)      |
| C(1S)  | 0.97516(11) | 1.01660(9)  | 0.77921(13) | 0.0688(10)    |
| C(2S)  | 0.94799(9)  | 0.95447(10) | 0.80334(10) | 0.0468(7)     |
| C(3S)  | 0.97413(8)  | 0.89328(9)  | 0.77688(13) | 0.0498(7)     |
| N(3)   | 0.4913(3)   | 0.96866(10) | 0.7409(4)   | 0.0241(13)    |
| C(1)   | 0.5249(2)   | 1.01349(17) | 0.7829(2)   | 0.0267(11)    |
| N(4)   | 0.5035(3)   | 1.07930(12) | 0.76649(18) | 0.0291(14)    |
| C(2)   | 0.4556(3)   | 1.07626(14) | 0.71169(19) | 0.0290(10)    |
| C(3)   | 0.4474(2)   | 1.00792(18) | 0.6958(3)   | 0.0247(11)    |
| C(4)   | 0.5278(3)   | 1.1417(2)   | 0.8069(3)   | 0.0379(12)    |
| C(5)   | 0.5119(5)   | 1.2089(2)   | 0.7673(3)   | 0.053(3)      |

<sup>a</sup>*U*(eq) is defined as one third of the trace of the orthogonalized  $\mathbf{U}_{ij}$  tensor.

The estimated standard deviations of the least significant digits are given in parentheses.

**Table S9.** Bond Lengths for [Co(TpivPP)(1-EtIm)(O<sub>2</sub>)]·C<sub>6</sub>H<sub>6</sub> (100 K, C2/c form)<sup>a</sup>

| bond          | length (Å) | bond          | length (Å) |
|---------------|------------|---------------|------------|
| Co(1)–O(1)    | 1.899(2)   | C(21)–H(21b)  | 0.9800     |
| Co(1)–N(1)#1  | 1.989(2)   | C(21)–H(21C)  | 0.9800     |
| Co(1)–N(1)    | 1.989(2)   | C(22)–H(22a)  | 0.9800     |
| Co(1)–N(2)#1  | 1.9900(19) | C(22)–H(22b)  | 0.9800     |
| Co(1)–N(2)    | 1.9900(19) | C(22)–H(22C)  | 0.9800     |
| Co(1)–N(3)#1  | 2.032(2)   | C(23)–H(23a)  | 0.9800     |
| Co(1)–N(3)    | 2.0322(19) | C(23)–H(23b)  | 0.9800     |
| O(1)–O(2)#1   | 1.116(4)   | C(23)–H(23C)  | 0.9800     |
| O(1)–O(2)     | 1.116(4)   | C(20b)–C(21b) | 1.5067     |
| O(2)–O(2)#1   | 1.771(8)   | C(20b)–C(23b) | 1.5070     |
| O(3)–C(12)    | 1.219(3)   | C(20b)–C(22b) | 1.5070     |
| O(4)–C(19)    | 1.220(3)   | C(21b)–H(21d) | 0.9800     |
| N(1)–C(a1)    | 1.360(3)   | C(21b)–H(21e) | 0.9800     |
| N(1)–C(a2)    | 1.383(3)   | C(21b)–H(21F) | 0.9800     |
| N(2)–C(a3)    | 1.358(3)   | C(22b)–H(22d) | 0.9800     |
| N(2)–C(a4)    | 1.371(4)   | C(22b)–H(22e) | 0.9800     |
| N(5)–C(12)    | 1.351(3)   | C(22b)–H(22F) | 0.9800     |
| N(5)–C(7)     | 1.407(3)   | C(23b)–H(23d) | 0.9800     |
| N(5)–H(5a)    | 0.8800     | C(23b)–H(23e) | 0.9800     |
| N(6)–C(19)    | 1.350(3)   | C(23b)–H(23F) | 0.9800     |
| N(6)–C(14)    | 1.415(3)   | C(24)–C(27)   | 1.5070     |
| N(6)–H(6a)    | 0.8800     | C(24)–C(25)   | 1.5070     |
| C(a1)–C(m1)   | 1.409(3)   | C(24)–C(26)   | 1.5070     |
| C(a1)–C(b1)   | 1.438(4)   | C(25)–H(25a)  | 0.9800     |
| C(a2)–C(m2)   | 1.392(3)   | C(25)–H(25b)  | 0.9800     |
| C(a2)–C(b2)   | 1.439(4)   | C(25)–H(25C)  | 0.9800     |
| C(a3)–C(m2)   | 1.402(4)   | C(26)–H(26a)  | 0.9800     |
| C(a3)–C(b3)   | 1.450(3)   | C(26)–H(26b)  | 0.9800     |
| C(a4)–C(m1#1) | 1.385(4)   | C(26)–H(26C)  | 0.9800     |
| C(a4)–C(b4)   | 1.443(3)   | C(27)–H(27a)  | 0.9800     |
| C(b1)–C(b2)   | 1.353(4)   | C(27)–H(27b)  | 0.9800     |
| C(b1)–H(ba)   | 0.9500     | C(27)–H(27C)  | 0.9800     |
| C(b2)–H(bb)   | 0.9500     | C(24b)–C(27b) | 1.5068     |
| C(b3)–C(b4)   | 1.333(4)   | C(24b)–C(26b) | 1.5069     |

**Table S9.** Continued

| bond          | length (Å) | bond           | length (Å) |
|---------------|------------|----------------|------------|
| C(b3)–H(bC)   | 0.9500     | C(24b)–C(25b)  | 1.5070     |
| C(b4)–H(bd)   | 0.9500     | C(25b)–H(25d)  | 0.9800     |
| C(m1)–C(a4#1) | 1.385(4)   | C(25b)–H(25e)  | 0.9800     |
| C(m1)–C(6)    | 1.506(4)   | C(25b)–H(25F)  | 0.9800     |
| C(m2)–C(13)   | 1.497(3)   | C(26b)–H(26d)  | 0.9800     |
| C(6)–C(7)     | 1.399(4)   | C(26b)–H(26e)  | 0.9800     |
| C(6)–C(11)    | 1.400(3)   | C(26b)–H(26F)  | 0.9800     |
| C(7)–C(8)     | 1.385(4)   | C(27b)–H(27d)  | 0.9800     |
| C(8)–C(9)     | 1.387(4)   | C(27b)–H(27e)  | 0.9800     |
| C(8)–H(8a)    | 0.9500     | C(27b)–H(27F)  | 0.9800     |
| C(9)–C(10)    | 1.378(4)   | C(1S)–C(2S)    | 1.3679     |
| C(9)–H(9a)    | 0.9500     | C(1S)–C(1S)#2) | 1.416(5)   |
| C(10)–C(11)   | 1.386(4)   | C(1S)–H(1Sa)   | 0.9500     |
| C(10)–H(10a)  | 0.9500     | C(2S)–C(3S)    | 1.3598     |
| C(11)–H(11a)  | 0.9500     | C(2S)–H(2Sa)   | 0.9500     |
| C(12)–C(20b)  | 1.505(7)   | C(3S)–C(3S)#2) | 1.379(4)   |
| C(12)–C(20)   | 1.593(7)   | C(3S)–H(3Sa)   | 0.9500     |
| C(13)–C(18)   | 1.387(3)   | N(3)–C(1)      | 1.3102     |
| C(13)–C(14)   | 1.402(3)   | N(3)–C(3)      | 1.3810     |
| C(14)–C(15)   | 1.398(3)   | C(1)–N(4)      | 1.3562     |
| C(15)–C(16)   | 1.372(4)   | C(1)–H(1a)     | 0.9500     |
| C(15)–H(15a)  | 0.9500     | N(4)–C(2)      | 1.3404     |
| C(16)–C(17)   | 1.394(4)   | N(4)–C(4)      | 1.477(5)   |
| C(16)–H(16a)  | 0.9500     | C(2)–C(3)      | 1.3503     |
| C(17)–C(18)   | 1.377(4)   | C(2)–H(2a)     | 0.9500     |
| C(17)–H(17a)  | 0.9500     | C(3)–H(3a)     | 0.9500     |
| C(18)–H(18a)  | 0.9500     | C(4)–C(5)      | 1.507(7)   |
| C(19)–C(24)   | 1.540(4)   | C(4)–H(4a)     | 0.9900     |
| C(19)–C(24b)  | 1.556(4)   | C(4)–H(4b)     | 0.9900     |
| C(20)–C(22)   | 1.5069     | C(5)–H(5b)     | 0.9800     |
| C(20)–C(21)   | 1.5069     | C(5)–H(5C)     | 0.9800     |
| C(20)–C(23)   | 1.5070     | C(5)–H(5d)     | 0.9800     |
| C(21)–H(21a)  | 0.9800     |                |            |

<sup>a</sup>The estimated standard deviations of the least significant digits are given in parentheses.

**Table S10.** Bond Angles for [Co(TpivPP)(1-EtIm)(O<sub>2</sub>)]·C<sub>6</sub>H<sub>6</sub> (100 K, C2/c form)<sup>a</sup>

| angle               | degree     | angle                | degree   |
|---------------------|------------|----------------------|----------|
| O(1)–Co(1)–N(1)#1   | 89.02(5)   | C(20)–C(21)–H(21C)   | 109.5    |
| O(1)–Co(1)–N(1)     | 89.02(5)   | H(21a)–C(21)–H(21C)  | 109.5    |
| N(1)#1–Co(1)–N(1)   | 178.05(11) | H(21b)–C(21)–H(21C)  | 109.5    |
| O(1)–Co(1)–N(2)#1   | 89.64(5)   | C(20)–C(22)–H(22a)   | 109.5    |
| N(1)#1–Co(1)–N(2)#1 | 89.96(9)   | C(20)–C(22)–H(22b)   | 109.5    |
| N(1)–Co(1)–N(2)#1   | 90.03(9)   | H(22a)–C(22)–H(22b)  | 109.5    |
| O(1)–Co(1)–N(2)     | 89.64(5)   | C(20)–C(22)–H(22C)   | 109.5    |
| N(1)#1–Co(1)–N(2)   | 90.03(9)   | H(22a)–C(22)–H(22C)  | 109.5    |
| N(1)–Co(1)–N(2)     | 89.96(9)   | H(22b)–C(22)–H(22C)  | 109.5    |
| N(2)#1–Co(1)–N(2)   | 179.28(10) | C(20)–C(23)–H(23a)   | 109.5    |
| O(1)–Co(1)–N(3)#1   | 173.44(11) | C(20)–C(23)–H(23b)   | 109.5    |
| N(1)#1–Co(1)–N(3)#1 | 97.07(13)  | H(23a)–C(23)–H(23b)  | 109.5    |
| N(1)–Co(1)–N(3)#1   | 84.88(13)  | C(20)–C(23)–H(23C)   | 109.5    |
| N(2)#1–Co(1)–N(3)#1 | 88.0(2)    | H(23a)–C(23)–H(23C)  | 109.5    |
| N(2)–Co(1)–N(3)#1   | 92.8(2)    | H(23b)–C(23)–H(23C)  | 109.5    |
| O(1)–Co(1)–N(3)     | 173.44(11) | C(12)–C(20b)–C(21b)  | 111.4(5) |
| N(1)#1–Co(1)–N(3)   | 84.88(13)  | C(12)–C(20b)–C(23b)  | 103.2(8) |
| N(1)–Co(1)–N(3)     | 97.07(13)  | C(21b)–C(20b)–C(23b) | 109.5    |
| N(2)#1–Co(1)–N(3)   | 92.8(2)    | C(12)–C(20b)–C(22b)  | 113.5(5) |
| N(2)–Co(1)–N(3)     | 88.0(2)    | C(21b)–C(20b)–C(22b) | 109.5    |
| N(3)#1–Co(1)–N(3)   | 13.1(2)    | C(23b)–C(20b)–C(22b) | 109.5    |
| O(2)#1–O(1)–O(2)    | 105.0(4)   | C(20b)–C(21b)–H(21d) | 109.5    |
| O(2)#1–O(1)–Co(1)   | 127.5(2)   | C(20b)–C(21b)–H(21e) | 109.5    |
| O(2)–O(1)–Co(1)     | 127.5(2)   | H(21d)–C(21b)–H(21e) | 109.5    |
| O(1)–O(2)–O(2)#1    | 37.5(2)    | C(20b)–C(21b)–H(21F) | 109.5    |
| C(a1)–N(1)–C(a2)    | 105.3(2)   | H(21d)–C(21b)–H(21f) | 109.5    |
| C(a1)–N(1)–Co(1)    | 127.57(18) | H(21e)–C(21b)–H(21f) | 109.5    |
| C(a2)–N(1)–Co(1)    | 127.16(18) | C(20b)–C(22b)–H(22d) | 109.5    |
| C(a3)–N(2)–C(a4)    | 105.4(2)   | C(20b)–C(22b)–H(22e) | 109.5    |
| C(a3)–N(2)–Co(1)    | 127.52(18) | H(22d)–C(22b)–H(22e) | 109.5    |
| C(a4)–N(2)–Co(1)    | 127.06(17) | C(20b)–C(22b)–H(22F) | 109.5    |
| C(12)–N(5)–C(7)     | 130.6(2)   | H(22d)–C(22b)–H(22f) | 109.5    |
| C(12)–N(5)–H(5a)    | 114.7      | H(22e)–C(22b)–H(22f) | 109.5    |
| C(7)–N(5)–H(5a)     | 114.7      | C(20b)–C(23b)–H(23d) | 109.5    |

**Table S10.** Continued

| angle               | degree   | angle                | degree     |
|---------------------|----------|----------------------|------------|
| C(19)–N(6)–C(14)    | 127.4(2) | C(20b)–C(23b)–H(23e) | 109.5      |
| C(19)–N(6)–H(6a)    | 116.3    | H(23d)–C(23b)–H(23e) | 109.5      |
| C(14)–N(6)–H(6a)    | 116.3    | C(20b)–C(23b)–H(23F) | 109.5      |
| N(1)–C(a1)–C(m1)    | 125.7(3) | H(23d)–C(23b)–H(23f) | 109.5      |
| N(1)–C(a1)–C(b1)    | 110.9(2) | H(23e)–C(23b)–H(23f) | 109.5      |
| C(m1)–C(a1)–C(b1)   | 123.5(3) | C(27)–C(24)–C(25)    | 109.5      |
| N(1)–C(a2)–C(m2)    | 126.0(3) | C(27)–C(24)–C(26)    | 109.5      |
| N(1)–C(a2)–C(b2)    | 110.4(2) | C(25)–C(24)–C(26)    | 109.5      |
| C(m2)–C(a2)–C(b2)   | 123.5(3) | C(27)–C(24)–C(19)    | 115.1(3)   |
| N(2)–C(a3)–C(m2)    | 126.6(2) | C(25)–C(24)–C(19)    | 101.7(3)   |
| N(2)–C(a3)–C(b3)    | 110.8(2) | C(26)–C(24)–C(19)    | 111.3(3)   |
| C(m2)–C(a3)–C(b3)   | 122.6(2) | C(24)–C(25)–H(25a)   | 109.5      |
| N(2)–C(a4)–C(m1#1)  | 126.2(2) | C(24)–C(25)–H(25b)   | 109.5      |
| N(2)–C(a4)–C(b4)    | 110.1(2) | H(25a)–C(25)–H(25b)  | 109.5      |
| C(m1#1)–C(a4)–C(b4) | 123.6(2) | C(24)–C(25)–H(25C)   | 109.5      |
| C(b2)–C(b1)–C(a1)   | 107.0(3) | H(25a)–C(25)–H(25C)  | 109.5      |
| C(b2)–C(b1)–H(ba)   | 126.5    | H(25b)–C(25)–H(25C)  | 109.5      |
| C(a1)–C(b1)–H(ba)   | 126.5    | C(24)–C(26)–H(26a)   | 109.5      |
| C(b1)–C(b2)–C(a2)   | 106.5(3) | C(24)–C(26)–H(26b)   | 109.5      |
| C(b1)–C(b2)–H(bb)   | 126.8    | H(26a)–C(26)–H(26b)  | 109.5      |
| C(a2)–C(b2)–H(bb)   | 126.8    | C(24)–C(26)–H(26C)   | 109.5      |
| C(b4)–C(b3)–C(a3)   | 106.3(2) | H(26a)–C(26)–H(26C)  | 109.5      |
| C(b4)–C(b3)–H(bC)   | 126.9    | H(26b)–C(26)–H(26C)  | 109.5      |
| C(a3)–C(b3)–H(bC)   | 126.9    | C(24)–C(27)–H(27a)   | 109.5      |
| C(b3)–C(b4)–C(a4)   | 107.4(2) | C(24)–C(27)–H(27b)   | 109.5      |
| C(b3)–C(b4)–H(bd)   | 126.3    | H(27a)–C(27)–H(27b)  | 109.5      |
| C(a4)–C(b4)–H(bd)   | 126.3    | C(24)–C(27)–H(27C)   | 109.5      |
| C(a4#1)–C(m1)–C(a1) | 123.0(2) | H(27a)–C(27)–H(27C)  | 109.5      |
| C(a4#1)–C(m1)–C(6)  | 118.9(2) | H(27b)–C(27)–H(27C)  | 109.5      |
| C(a1)–C(m1)–C(6)    | 117.9(2) | C(27b)–C(24b)–C(26b) | 109.5      |
| C(a2)–C(m2)–C(a3)   | 122.5(2) | C(27b)–C(24b)–C(25b) | 109.5      |
| C(a2)–C(m2)–C(13)   | 118.0(2) | C(26b)–C(24b)–C(25b) | 109.5      |
| C(a3)–C(m2)–C(13)   | 119.3(2) | C(27b)–C(24b)–C(19)  | 103.65(15) |
| C(7)–C(6)–C(11)     | 119.0(2) | C(26b)–C(24b)–C(19)  | 108.47(17) |

**Table S10.** Continued

| angle              | degree   | angle                | degree     |
|--------------------|----------|----------------------|------------|
| C(7)–C(6)–C(m1)    | 121.0(2) | C(25b)–C(24b)–C(19)  | 116.06(13) |
| C(11)–C(6)–C(m1)   | 120.0(2) | C(24b)–C(25b)–H(25d) | 109.5      |
| C(8)–C(7)–C(6)     | 120.2(2) | C(24b)–C(25b)–H(25e) | 109.5      |
| C(8)–C(7)–N(5)     | 123.5(3) | H(25d)–C(25b)–H(25e) | 109.5      |
| C(6)–C(7)–N(5)     | 116.3(2) | C(24b)–C(25b)–H(25F) | 109.5      |
| C(7)–C(8)–C(9)     | 119.6(3) | H(25d)–C(25b)–H(25f) | 109.5      |
| C(7)–C(8)–H(8a)    | 120.2    | H(25e)–C(25b)–H(25f) | 109.5      |
| C(9)–C(8)–H(8a)    | 120.2    | C(24b)–C(26b)–H(26d) | 109.5      |
| C(10)–C(9)–C(8)    | 121.3(3) | C(24b)–C(26b)–H(26e) | 109.5      |
| C(10)–C(9)–H(9a)   | 119.4    | H(26d)–C(26b)–H(26e) | 109.5      |
| C(8)–C(9)–H(9a)    | 119.4    | C(24b)–C(26b)–H(26F) | 109.5      |
| C(9)–C(10)–C(11)   | 119.2(3) | H(26d)–C(26b)–H(26f) | 109.5      |
| C(9)–C(10)–H(10a)  | 120.4    | H(26e)–C(26b)–H(26f) | 109.5      |
| C(11)–C(10)–H(10a) | 120.4    | C(24b)–C(27b)–H(27d) | 109.5      |
| C(10)–C(11)–C(6)   | 120.8(3) | C(24b)–C(27b)–H(27e) | 109.5      |
| C(10)–C(11)–H(11a) | 119.6    | H(27d)–C(27b)–H(27e) | 109.5      |
| C(6)–C(11)–H(11a)  | 119.6    | C(24b)–C(27b)–H(27F) | 109.5      |
| O(3)–C(12)–N(5)    | 123.1(2) | H(27d)–C(27b)–H(27f) | 109.5      |
| O(3)–C(12)–C(20b)  | 116.6(3) | H(27e)–C(27b)–H(27f) | 109.5      |
| N(5)–C(12)–C(20b)  | 119.8(3) | C(2S)–C(1S)–C(1S)#2  | 119.1      |
| O(3)–C(12)–C(20)   | 124.6(3) | C(2S)–C(1S)–H(1Sa)   | 120.4      |
| N(5)–C(12)–C(20)   | 112.3(3) | C(1S)#2–C(1S)–H(1Sa) | 120.4      |
| C(20b)–C(12)–C(20) | 12.3(3)  | C(3S)–C(2S)–C(1S)    | 120.2      |
| C(18)–C(13)–C(14)  | 118.2(2) | C(3S)–C(2S)–H(2Sa)   | 119.9      |
| C(18)–C(13)–C(m2)  | 119.5(2) | C(1S)–C(2S)–H(2Sa)   | 119.9      |
| C(14)–C(13)–C(m2)  | 122.2(2) | C(2S)–C(3S)–C(3S)#2  | 120.4      |
| C(15)–C(14)–C(13)  | 120.1(2) | C(2S)–C(3S)–H(3Sa)   | 119.8      |
| C(15)–C(14)–N(6)   | 122.0(2) | C(3S)#2–C(3S)–H(3Sa) | 119.8      |
| C(13)–C(14)–N(6)   | 117.9(2) | C(1)–N(3)–C(3)       | 105.8      |
| C(16)–C(15)–C(14)  | 120.0(3) | C(1)–N(3)–Co(1)      | 124.5(3)   |
| C(16)–C(15)–H(15a) | 120.0    | C(3)–N(3)–Co(1)      | 129.6(2)   |
| C(14)–C(15)–H(15a) | 120.0    | N(3)–C(1)–N(4)       | 110.0      |
| C(15)–C(16)–C(17)  | 120.7(3) | N(3)–C(1)–H(1a)      | 125.0      |
| C(15)–C(16)–H(16a) | 119.6    | N(4)–C(1)–H(1a)      | 125.0      |

**Table S10.** Continued

| angle               | degree    | angle            | degree   |
|---------------------|-----------|------------------|----------|
| C(17)–C(16)–H(16a)  | 119.6     | C(2)–N(4)–C(1)   | 108.6    |
| C(18)–C(17)–C(16)   | 118.8(3)  | C(2)–N(4)–C(4)   | 127.7(3) |
| C(18)–C(17)–H(17a)  | 120.6     | C(1)–N(4)–C(4)   | 123.7(3) |
| C(16)–C(17)–H(17a)  | 120.6     | N(4)–C(2)–C(3)   | 106.1    |
| C(17)–C(18)–C(13)   | 122.1(3)  | N(4)–C(2)–H(2a)  | 127.0    |
| C(17)–C(18)–H(18a)  | 118.9     | C(3)–C(2)–H(2a)  | 127.0    |
| C(13)–C(18)–H(18a)  | 118.9     | C(2)–C(3)–N(3)   | 109.5    |
| O(4)–C(19)–N(6)     | 123.3(3)  | C(2)–C(3)–H(3a)  | 125.2    |
| O(4)–C(19)–C(24)    | 119.8(3)  | N(3)–C(3)–H(3a)  | 125.2    |
| N(6)–C(19)–C(24)    | 116.3(2)  | N(4)–C(4)–C(5)   | 113.1(4) |
| O(4)–C(19)–C(24b)   | 119.2(3)  | N(4)–C(4)–H(4a)  | 109.0    |
| N(6)–C(19)–C(24b)   | 116.5(2)  | C(5)–C(4)–H(4a)  | 109.0    |
| C(24)–C(19)–C(24b)  | 18.01(17) | N(4)–C(4)–H(4b)  | 109.0    |
| C(22)–C(20)–C(21)   | 109.5     | C(5)–C(4)–H(4b)  | 109.0    |
| C(22)–C(20)–C(23)   | 109.5     | H(4a)–C(4)–H(4b) | 107.8    |
| C(21)–C(20)–C(23)   | 109.5     | C(4)–C(5)–H(5b)  | 109.5    |
| C(22)–C(20)–C(12)   | 116.5(4)  | C(4)–C(5)–H(5C)  | 109.5    |
| C(21)–C(20)–C(12)   | 102.6(4)  | H(5b)–C(5)–H(5C) | 109.5    |
| C(23)–C(20)–C(12)   | 109.0(6)  | C(4)–C(5)–H(5d)  | 109.5    |
| C(20)–C(21)–H(21a)  | 109.5     | H(5b)–C(5)–H(5d) | 109.5    |
| C(20)–C(21)–H(21b)  | 109.5     | H(5C)–C(5)–H(5d) | 109.5    |
| H(21a)–C(21)–H(21b) | 109.5     |                  |          |

<sup>a</sup>The estimated standard deviations of the least significant digits are given in parentheses.



**Table S11.** Anisotropic Displacement Parameters ( $\text{\AA}^2$ ) for  $[\text{Co}(\text{TpivPP})(1\text{-EtIm})(\text{O}_2)]\cdot\text{C}_6\text{H}_6$  (100 K,  $C2/c$  form)<sup>a</sup>

| atom  | $U_{11}$   | $U_{22}$   | $U_{33}$   | $U_{23}$    | $U_{13}$    | $U_{12}$    |
|-------|------------|------------|------------|-------------|-------------|-------------|
| Co(1) | 0.0406(3)  | 0.0174(2)  | 0.0223(2)  | 0.000       | 0.0060(2)   | 0.000       |
| O(1)  | 0.0761(19) | 0.0218(12) | 0.0359(14) | 0.000       | -0.0034(14) | 0.000       |
| O(2)  | 0.073(3)   | 0.0272(19) | 0.060(3)   | -0.0031(17) | 0.026(2)    | 0.0055(18)  |
| O(3)  | 0.0662(13) | 0.0523(12) | 0.0315(10) | 0.0060(9)   | -0.0002(9)  | 0.0012(10)  |
| O(4)  | 0.0431(11) | 0.0490(12) | 0.0679(14) | -0.0049(10) | 0.0107(10)  | 0.0046(9)   |
| N(1)  | 0.0441(12) | 0.0270(10) | 0.0251(11) | -0.0070(8)  | 0.0058(9)   | -0.0042(8)  |
| N(2)  | 0.0448(12) | 0.0196(9)  | 0.0234(10) | 0.0015(7)   | 0.0041(9)   | 0.0029(8)   |
| N(5)  | 0.0799(17) | 0.0367(12) | 0.0185(9)  | -0.0037(9)  | 0.0000(10)  | 0.0026(12)  |
| N(6)  | 0.0336(11) | 0.0345(12) | 0.0662(15) | -0.0119(11) | 0.0112(10)  | -0.0040(9)  |
| C(A1) | 0.0439(14) | 0.0340(13) | 0.0233(12) | -0.0094(10) | 0.0003(10)  | -0.0071(11) |
| C(A2) | 0.0396(13) | 0.0267(12) | 0.0301(13) | -0.0048(10) | 0.0044(10)  | -0.0042(10) |
| C(A3) | 0.0425(13) | 0.0185(10) | 0.0262(12) | 0.0000(9)   | 0.0068(10)  | -0.0030(9)  |
| C(A4) | 0.0498(15) | 0.0218(11) | 0.0237(12) | 0.0034(9)   | 0.0032(11)  | 0.0003(10)  |
| C(B1) | 0.0451(15) | 0.0491(16) | 0.0289(14) | -0.0096(11) | 0.0007(12)  | -0.0053(12) |
| C(B2) | 0.0411(14) | 0.0420(15) | 0.0328(14) | -0.0060(11) | 0.0036(11)  | -0.0043(11) |
| C(B3) | 0.0512(16) | 0.0313(13) | 0.0263(13) | -0.0002(10) | 0.0092(12)  | 0.0018(11)  |
| C(B4) | 0.0456(14) | 0.0314(12) | 0.0246(12) | 0.0034(10)  | 0.0050(11)  | 0.0012(11)  |
| C(M1) | 0.0470(15) | 0.0287(12) | 0.0251(12) | -0.0067(9)  | 0.0048(11)  | -0.0041(10) |
| C(M2) | 0.0440(13) | 0.0215(11) | 0.0296(13) | -0.0053(9)  | 0.0077(11)  | -0.0020(10) |
| C(6)  | 0.0400(14) | 0.0429(15) | 0.0239(12) | -0.0101(11) | 0.0045(10)  | -0.0042(11) |
| C(7)  | 0.0456(14) | 0.0406(14) | 0.0237(12) | -0.0086(11) | 0.0038(10)  | -0.0043(11) |
| C(8)  | 0.0433(14) | 0.0546(17) | 0.0269(13) | -0.0077(12) | -0.0015(11) | -0.0020(12) |
| C(9)  | 0.0375(14) | 0.0647(19) | 0.0283(13) | -0.0144(13) | -0.0012(11) | -0.0075(13) |
| C(10) | 0.0349(13) | 0.0552(17) | 0.0371(14) | -0.0190(13) | 0.0049(11)  | -0.0091(12) |
| C(11) | 0.0390(13) | 0.0443(15) | 0.0311(13) | -0.0121(11) | 0.0041(10)  | -0.0046(11) |
| C(12) | 0.0466(15) | 0.0401(14) | 0.0263(13) | -0.0034(11) | 0.0110(11)  | -0.0011(11) |
| C(13) | 0.0424(13) | 0.0305(12) | 0.0241(12) | 0.0005(9)   | 0.0022(10)  | -0.0076(10) |
| C(14) | 0.0403(13) | 0.0369(13) | 0.0323(13) | -0.0038(11) | 0.0068(10)  | -0.0066(11) |
| C(15) | 0.0468(15) | 0.0500(16) | 0.0399(14) | -0.0066(13) | 0.0159(12)  | -0.0068(13) |
| C(16) | 0.0430(15) | 0.0617(19) | 0.0376(15) | 0.0059(13)  | 0.0115(12)  | -0.0162(13) |
| C(17) | 0.0554(17) | 0.0508(18) | 0.0400(15) | 0.0067(13)  | 0.0027(12)  | -0.0247(14) |
| C(18) | 0.0549(15) | 0.0341(14) | 0.0315(13) | 0.0031(11)  | 0.0032(11)  | -0.0083(11) |
| C(19) | 0.0413(14) | 0.0376(14) | 0.0424(15) | -0.0073(12) | 0.0054(11)  | -0.0015(11) |
| C(20) | 0.037(3)   | 0.027(3)   | 0.030(3)   | -0.004(3)   | 0.002(3)    | 0.005(2)    |

**Table S11.** Continued

| atom   | $U_{11}$   | $U_{22}$   | $U_{33}$   | $U_{23}$    | $U_{13}$   | $U_{12}$    |
|--------|------------|------------|------------|-------------|------------|-------------|
| C(21)  | 0.036(3)   | 0.044(3)   | 0.042(4)   | -0.001(3)   | 0.012(3)   | 0.002(2)    |
| C(22)  | 0.055(4)   | 0.028(2)   | 0.027(2)   | -0.0029(19) | -0.004(2)  | 0.001(2)    |
| C(23)  | 0.038(4)   | 0.041(4)   | 0.039(4)   | 0.008(3)    | 0.010(3)   | -0.012(3)   |
| C(20B) | 0.038(4)   | 0.041(5)   | 0.016(3)   | -0.001(3)   | 0.001(3)   | -0.006(3)   |
| C(21B) | 0.032(3)   | 0.062(5)   | 0.053(5)   | -0.017(4)   | 0.001(3)   | 0.006(3)    |
| C(22B) | 0.088(8)   | 0.054(4)   | 0.027(3)   | -0.013(3)   | 0.005(4)   | -0.018(5)   |
| C(23B) | 0.041(5)   | 0.077(9)   | 0.036(6)   | -0.025(4)   | 0.006(4)   | -0.001(4)   |
| C(24)  | 0.034(3)   | 0.036(3)   | 0.018(3)   | 0.000(2)    | -0.013(2)  | -0.007(2)   |
| C(25)  | 0.041(3)   | 0.065(4)   | 0.036(3)   | -0.001(3)   | -0.004(2)  | -0.011(3)   |
| C(26)  | 0.091(5)   | 0.048(3)   | 0.040(3)   | -0.017(3)   | 0.001(3)   | -0.021(3)   |
| C(27)  | 0.033(3)   | 0.067(4)   | 0.058(4)   | 0.026(3)    | -0.012(3)  | -0.016(3)   |
| C(24B) | 0.056(4)   | 0.028(3)   | 0.008(4)   | 0.000(2)    | -0.008(2)  | 0.002(3)    |
| C(25B) | 0.048(4)   | 0.062(4)   | 0.020(3)   | -0.005(3)   | 0.004(2)   | -0.009(3)   |
| C(26B) | 0.061(4)   | 0.039(4)   | 0.059(4)   | -0.005(3)   | 0.008(3)   | 0.011(3)    |
| C(27B) | 0.059(6)   | 0.043(4)   | 0.056(5)   | 0.009(3)    | 0.013(4)   | -0.002(4)   |
| C(1S)  | 0.064(2)   | 0.0494(18) | 0.093(3)   | -0.0125(19) | 0.0377(19) | -0.0019(15) |
| C(2S)  | 0.0379(14) | 0.0554(18) | 0.0471(16) | 0.0025(14)  | 0.0080(12) | 0.0029(12)  |
| C(3S)  | 0.0592(19) | 0.0463(16) | 0.0440(16) | 0.0041(14)  | 0.0058(14) | -0.0014(14) |
| N(3)   | 0.038(3)   | 0.0217(15) | 0.012(4)   | -0.0005(19) | -0.001(2)  | 0.002(2)    |
| C(1)   | 0.032(3)   | 0.028(3)   | 0.020(3)   | -0.002(2)   | -0.003(2)  | 0.002(2)    |
| N(4)   | 0.040(2)   | 0.0210(16) | 0.027(4)   | -0.0063(14) | 0.016(4)   | -0.004(2)   |
| C(2)   | 0.035(3)   | 0.024(2)   | 0.028(3)   | 0.001(2)    | 0.002(2)   | 0.002(2)    |
| C(3)   | 0.033(3)   | 0.021(2)   | 0.020(3)   | 0.0014(19)  | -0.005(2)  | 0.002(2)    |
| C(4)   | 0.040(3)   | 0.029(3)   | 0.045(3)   | -0.018(2)   | -0.003(2)  | -0.004(2)   |
| C(5)   | 0.087(7)   | 0.021(2)   | 0.052(7)   | -0.010(2)   | 0.016(5)   | -0.010(3)   |

<sup>a</sup>The estimated standard deviations of the least significant digits are given in parentheses.

The anisotropic displacement factor exponent takes the form:  $-2 \pi [\text{h}^2 U_{11} + \dots + 2 \text{h k a}^* \text{ b}^* U_{12}]$ .

**Table S12.** Hydrogen Atom Coordinates and Equivalent Isotropic Displacement Parameters ( $\text{\AA}^2$ ) for  $[\text{Co}(\text{TpivPP})(1\text{-EtIm})(\text{O}_2)]\cdot\text{C}_6\text{H}_6$  (100 K,  $C2/c$  form)<sup>a</sup>

| atom   | $x$    | $y$    | $z$    | $U(\text{eq})$ |
|--------|--------|--------|--------|----------------|
| H(5A)  | 0.6026 | 0.7553 | 0.9514 | 0.054          |
| H(6A)  | 0.6931 | 0.7372 | 0.6302 | 0.054          |
| H(BA)  | 0.7155 | 0.8601 | 0.9240 | 0.049          |
| H(BB)  | 0.7707 | 0.8491 | 0.8012 | 0.046          |
| H(BC)  | 0.6705 | 0.8588 | 0.5313 | 0.043          |
| H(BD)  | 0.5498 | 0.8690 | 0.4759 | 0.041          |
| H(8A)  | 0.6583 | 0.7754 | 1.1333 | 0.050          |
| H(9A)  | 0.6631 | 0.8828 | 1.1927 | 0.052          |
| H(10A) | 0.6268 | 0.9844 | 1.1339 | 0.051          |
| H(11A) | 0.5841 | 0.9787 | 1.0139 | 0.046          |
| H(15A) | 0.8724 | 0.7572 | 0.5812 | 0.055          |
| H(16A) | 0.9375 | 0.8600 | 0.5886 | 0.057          |
| H(17A) | 0.8856 | 0.9606 | 0.6389 | 0.059          |
| H(18A) | 0.7669 | 0.9573 | 0.6775 | 0.048          |
| H(21A) | 0.6776 | 0.5675 | 0.9012 | 0.061          |
| H(21B) | 0.6996 | 0.5814 | 0.9845 | 0.061          |
| H(21C) | 0.7104 | 0.6414 | 0.9248 | 0.061          |
| H(22A) | 0.5663 | 0.6209 | 0.8504 | 0.055          |
| H(22B) | 0.6053 | 0.6938 | 0.8658 | 0.055          |
| H(22C) | 0.5262 | 0.6799 | 0.8968 | 0.055          |
| H(23A) | 0.5506 | 0.5367 | 0.9428 | 0.058          |
| H(23B) | 0.5124 | 0.5887 | 0.9989 | 0.058          |
| H(23C) | 0.5830 | 0.5468 | 1.0232 | 0.058          |
| H(21D) | 0.7288 | 0.6040 | 0.9675 | 0.073          |
| H(21E) | 0.6813 | 0.5384 | 0.9430 | 0.073          |
| H(21F) | 0.6841 | 0.5612 | 1.0270 | 0.073          |
| H(22D) | 0.6654 | 0.6774 | 0.8777 | 0.084          |
| H(22E) | 0.5794 | 0.6823 | 0.8788 | 0.084          |
| H(22F) | 0.6179 | 0.6117 | 0.8532 | 0.084          |
| H(23D) | 0.5519 | 0.5687 | 1.0287 | 0.077          |
| H(23E) | 0.5491 | 0.5459 | 0.9447 | 0.077          |
| H(23F) | 0.5107 | 0.6164 | 0.9703 | 0.077          |
| H(25A) | 0.6817 | 0.5378 | 0.7020 | 0.071          |
| H(25B) | 0.7067 | 0.6116 | 0.7341 | 0.071          |

**Table S12.** Continued

| atom   | $x$    | $y$    | $z$    | $U(\text{eq})$ |
|--------|--------|--------|--------|----------------|
| H(25C) | 0.7652 | 0.5582 | 0.7031 | 0.071          |
| H(26A) | 0.6896 | 0.5180 | 0.5647 | 0.090          |
| H(26B) | 0.7735 | 0.5339 | 0.5759 | 0.090          |
| H(26C) | 0.7280 | 0.5770 | 0.5168 | 0.090          |
| H(27A) | 0.5996 | 0.5925 | 0.6110 | 0.079          |
| H(27B) | 0.6281 | 0.6574 | 0.5645 | 0.079          |
| H(27C) | 0.6189 | 0.6643 | 0.6511 | 0.079          |
| H(25D) | 0.6458 | 0.5769 | 0.7312 | 0.065          |
| H(25E) | 0.6487 | 0.6598 | 0.7214 | 0.065          |
| H(25F) | 0.7143 | 0.6197 | 0.7597 | 0.065          |
| H(26D) | 0.7198 | 0.5016 | 0.6616 | 0.079          |
| H(26E) | 0.7934 | 0.5412 | 0.6804 | 0.079          |
| H(26F) | 0.7695 | 0.5302 | 0.5971 | 0.079          |
| H(27D) | 0.6200 | 0.5722 | 0.5993 | 0.079          |
| H(27E) | 0.6785 | 0.5990 | 0.5419 | 0.079          |
| H(27F) | 0.6325 | 0.6540 | 0.5878 | 0.079          |
| H(1SA) | 0.9609 | 1.0592 | 0.8013 | 0.103          |
| H(2SA) | 0.9107 | 0.9541 | 0.8387 | 0.056          |
| H(3SA) | 0.9567 | 0.8503 | 0.7955 | 0.075          |
| H(1A)  | 0.5591 | 1.0016 | 0.8195 | 0.032          |
| H(2A)  | 0.4321 | 1.1144 | 0.6887 | 0.035          |
| H(3A)  | 0.4162 | 0.9896 | 0.6593 | 0.030          |
| H(4A)  | 0.5803 | 1.1383 | 0.8155 | 0.045          |
| H(4B)  | 0.5039 | 1.1427 | 0.8551 | 0.045          |
| H(5B)  | 0.5293 | 1.2484 | 0.7965 | 0.080          |
| H(5C)  | 0.4599 | 1.2134 | 0.7597 | 0.080          |
| H(5D)  | 0.5362 | 1.2088 | 0.7199 | 0.080          |

<sup>a</sup> $U(\text{eq})$  is defined as one third of the trace of the orthogonalized  $\mathbf{U}_{ij}$  tensor. The estimated standard deviations of the least significant digits are given in parentheses.

## Supporting Information

**Table S13.** Complete Crystallographic Details for [Co(TpivPP)(1-EtIm)(O<sub>2</sub>)]·C<sub>6</sub>H<sub>6</sub> (200 K, C2/c form)

|                                                              |                                                                   |
|--------------------------------------------------------------|-------------------------------------------------------------------|
| formula                                                      | C <sub>75</sub> H <sub>78</sub> CoN <sub>10</sub> O <sub>6</sub>  |
| FW, amu                                                      | 1274.40                                                           |
| <i>a</i> , Å                                                 | 18.5681(7)                                                        |
| <i>b</i> , Å                                                 | 19.2564(8)                                                        |
| <i>c</i> , Å                                                 | 18.4497(7)                                                        |
| $\beta$ , deg                                                | 90.169(2)                                                         |
| <i>V</i> , Å <sup>3</sup>                                    | 6596.7(4)                                                         |
| space group                                                  | C2/c                                                              |
| <i>Z</i>                                                     | 4                                                                 |
| D <sub>c</sub> , g/cm <sup>3</sup>                           | 1.283                                                             |
| F(000)                                                       | 2692                                                              |
| $\mu$ , mm <sup>-1</sup>                                     | 0.322                                                             |
| crystal dimensions, mm                                       | 0.39 × 0.26 × 0.19                                                |
| radiation                                                    | MoK $\alpha$ , $\bar{\lambda}$ = 0.71073 Å                        |
| temperature, K                                               | 200(2)                                                            |
| diffractometer                                               | Bruker Apex CCD                                                   |
| $\theta$ range for collected data, deg                       | 1.52–27.62                                                        |
| index range                                                  | –24 ≤ <i>h</i> ≤ 18<br>–25 ≤ <i>k</i> ≤ 24<br>–24 ≤ <i>l</i> ≤ 23 |
| total data collected                                         | 27807                                                             |
| absorption correction                                        | Semi-empirical from equiv                                         |
| relative transmission coefficients (I)                       | 0.9413 and 0.8847                                                 |
| unique data                                                  | 7611 ( <i>R</i> <sub>int</sub> = 0.0352)                          |
| unique observed data [ <i>I</i> > 2 $\sigma$ ( <i>I</i> )]   | 4828                                                              |
| refinement method                                            | Full-matrix least-squares on F <sup>2</sup>                       |
| data/restraints/parameters                                   | 7611/0/497                                                        |
| goodness-of-fit (pased on <i>F</i> <sup>2</sup> )            | 1.013                                                             |
| final <i>R</i> indices [ <i>I</i> > 2 $\sigma$ ( <i>I</i> )] | <i>R</i> <sub>1</sub> = 0.0486, <i>wR</i> <sub>2</sub> = 0.1266   |
| final <i>R</i> indices (all data)                            | <i>R</i> <sub>1</sub> = 0.0911, <i>wR</i> <sub>2</sub> = 0.1498   |

**Table S14.** Atomic Coordinates and Equivalent Isotropic Displacement Parameters ( $\text{\AA}^2$ ) for  $[\text{Co}(\text{TpivPP})(1\text{-EtIm})(\text{O}_2)]\cdot\text{C}_6\text{H}_6$  (200 K,  $C2/c$  form)<sup>a</sup>

| atom  | $x$         | $y$         | $z$         | $U(\text{eq})$ |
|-------|-------------|-------------|-------------|----------------|
| Co(1) | 0.5000      | 0.86278(2)  | 0.7500      | 0.0377(1)      |
| N(1)  | 0.45623(10) | 0.86207(8)  | 0.65227(9)  | 0.0391(4)      |
| N(2)  | 0.40317(10) | 0.86095(9)  | 0.79385(9)  | 0.0422(4)      |
| N(5)  | 0.25915(11) | 0.73366(11) | 0.62992(13) | 0.0647(6)      |
| N(6)  | 0.38992(13) | 0.75119(11) | 0.99745(10) | 0.0631(6)      |
| O(1)  | 0.5000      | 0.76419(12) | 0.7500      | 0.0565(6)      |
| O(2a) | 0.5435(4)   | 0.7286(2)   | 0.7715(4)   | 0.065(3)       |
| O(2b) | 0.493(3)    | 0.7276(11)  | 0.7972(14)  | 0.087(15)      |
| O(3)  | 0.17142(12) | 0.65428(12) | 0.61620(15) | 0.0962(8)      |
| O(4)  | 0.36864(16) | 0.67099(12) | 1.08220(11) | 0.1008(8)      |
| C(a1) | 0.49090(12) | 0.86623(11) | 0.58704(11) | 0.0425(5)      |
| C(a2) | 0.38406(12) | 0.85826(11) | 0.63535(11) | 0.0424(5)      |
| C(a3) | 0.33807(12) | 0.85629(11) | 0.75873(12) | 0.0434(5)      |
| C(a4) | 0.38630(13) | 0.86372(12) | 0.86635(12) | 0.0457(5)      |
| C(b1) | 0.43944(13) | 0.86531(12) | 0.52876(12) | 0.0503(6)      |
| C(b2) | 0.37440(14) | 0.85974(12) | 0.55844(12) | 0.0508(6)      |
| C(b3) | 0.28032(13) | 0.85476(13) | 0.81017(13) | 0.0532(6)      |
| C(b4) | 0.31023(13) | 0.86005(14) | 0.87587(13) | 0.0560(6)      |
| C(m1) | 0.32786(12) | 0.85552(11) | 0.68453(12) | 0.0438(5)      |
| C(m2) | 0.43556(13) | 0.86870(11) | 0.92307(11) | 0.0453(5)      |
| C(6)  | 0.25225(13) | 0.85532(12) | 0.65615(12) | 0.0481(5)      |
| C(7)  | 0.21932(13) | 0.79557(14) | 0.62949(13) | 0.0547(6)      |
| C(8)  | 0.14860(15) | 0.79849(17) | 0.60380(15) | 0.0709(8)      |
| C(9)  | 0.11139(16) | 0.85968(19) | 0.60657(16) | 0.0755(9)      |
| C(10) | 0.14254(17) | 0.91810(19) | 0.63345(16) | 0.0755(9)      |
| C(11) | 0.21287(15) | 0.91631(14) | 0.65731(14) | 0.0605(7)      |
| C(12) | 0.23457(15) | 0.66810(15) | 0.62664(15) | 0.0625(7)      |
| C(13) | 0.40683(13) | 0.87355(13) | 0.99865(12) | 0.0506(6)      |
| C(14) | 0.38530(13) | 0.81439(14) | 1.03526(12) | 0.0529(6)      |
| C(15) | 0.35888(15) | 0.81904(16) | 1.10546(13) | 0.0633(7)      |
| C(16) | 0.35533(15) | 0.88395(19) | 1.13807(15) | 0.0704(8)      |
| C(17) | 0.37706(15) | 0.94216(18) | 1.10317(15) | 0.0690(8)      |
| C(18) | 0.40268(14) | 0.93739(15) | 1.03312(14) | 0.0603(7)      |
| C(19) | 0.38184(15) | 0.68594(15) | 1.01983(13) | 0.0608(7)      |

**Table S14.** Continued

| atom   | <i>x</i>    | <i>y</i>    | <i>z</i>    | <i>U</i> (eq) |
|--------|-------------|-------------|-------------|---------------|
| N(3)   | 0.4915(3)   | 0.96753(9)  | 0.7584(3)   | 0.0351(10)    |
| C(1)   | 0.5260(2)   | 1.01169(11) | 0.7172(2)   | 0.0415(13)    |
| N(4)   | 0.50588(15) | 1.07753(9)  | 0.73352(14) | 0.0447(15)    |
| C(2)   | 0.45630(18) | 1.07508(11) | 0.78613(17) | 0.0464(13)    |
| C(3)   | 0.4474(2)   | 1.00721(12) | 0.8022(2)   | 0.0408(13)    |
| C(4)   | 0.5306(2)   | 1.13848(14) | 0.6919(2)   | 0.0648(14)    |
| C(5)   | 0.5154(3)   | 1.20588(10) | 0.7328(3)   | 0.089(3)      |
| C(1S)  | 0.4749(2)   | 0.4874(3)   | 0.2236(3)   | 0.1145(13)    |
| C(2S)  | 0.44837(19) | 0.5490(2)   | 0.19708(18) | 0.0917(11)    |
| C(3S)  | 0.4730(2)   | 0.6114(2)   | 0.22297(19) | 0.0944(11)    |
| C(21a) | 0.3941(3)   | 0.6302(3)   | 0.9581(2)   | 0.0499(17)    |
| C(22a) | 0.4420(4)   | 0.5727(5)   | 0.9855(5)   | 0.081(2)      |
| C(23a) | 0.4241(8)   | 0.6586(3)   | 0.8884(3)   | 0.085(3)      |
| C(24a) | 0.3194(3)   | 0.6022(5)   | 0.9449(7)   | 0.099(3)      |
| C(21b) | 0.3786(7)   | 0.6298(6)   | 0.9659(4)   | 0.052(3)      |
| C(22b) | 0.4500(6)   | 0.5943(13)  | 0.9779(8)   | 0.118(7)      |
| C(23b) | 0.3730(15)  | 0.6532(6)   | 0.8881(5)   | 0.093(5)      |
| C(24b) | 0.3184(7)   | 0.5799(10)  | 0.9823(10)  | 0.097(6)      |
| C(20a) | 0.2894(4)   | 0.6110(3)   | 0.6469(3)   | 0.057(2)      |
| C(25a) | 0.3500(7)   | 0.6150(7)   | 0.5929(4)   | 0.099(4)      |
| C(26a) | 0.3193(5)   | 0.6192(4)   | 0.7225(3)   | 0.092(3)      |
| C(27a) | 0.2524(4)   | 0.5416(3)   | 0.6404(6)   | 0.114(4)      |
| C(20b) | 0.2903(3)   | 0.6107(2)   | 0.6250(3)   | 0.057(2)      |
| C(25b) | 0.3662(5)   | 0.6355(6)   | 0.6121(5)   | 0.143(6)      |
| C(26b) | 0.2850(4)   | 0.5801(5)   | 0.7000(3)   | 0.093(3)      |
| C(27b) | 0.2711(4)   | 0.5563(4)   | 0.5696(4)   | 0.113(3)      |

<sup>a</sup>*U*(eq) is defined as one third of the trace of the orthogonalized  $\mathbf{U}_{ij}$  tensor.

The estimated standard deviations of the least significant digits are given in parentheses.

**Table S15.** Bond Lengths for [Co(TpivPP)(1-EtIm)(O<sub>2</sub>)]·C<sub>6</sub>H<sub>6</sub> (200 K, C2/c form)<sup>a</sup>

| bond           | length (Å) | bond           | length (Å) |
|----------------|------------|----------------|------------|
| Co(1)–O(1)     | 1.899(2)   | C(1)–H(1a)     | 0.9500     |
| Co(1)–N(2)#1)  | 1.9741(18) | N(4)–C(2)      | 1.3405     |
| Co(1)–N(2)     | 1.9741(18) | N(4)–C(4)      | 1.4763     |
| Co(1)–N(1)     | 1.9757(16) | C(2)–C(3)      | 1.3503     |
| Co(1)–N(1)#1)  | 1.9757(16) | C(2)–H(2a)     | 0.9500     |
| Co(1)–N(3)#1)  | 2.0293(18) | C(3)–H(3a)     | 0.9500     |
| Co(1)–N(3)     | 2.0293(18) | C(4)–C(5)      | 1.5273     |
| N(1)–C(a1)     | 1.369(3)   | C(4)–H(4a)     | 0.9900     |
| N(1)–C(a2)     | 1.377(3)   | C(4)–H(4b)     | 0.9900     |
| N(2)–C(a3)     | 1.373(3)   | C(5)–H(5b)     | 0.9800     |
| N(2)–C(a4)     | 1.376(3)   | C(5)–H(5C)     | 0.9800     |
| N(5)–C(12)     | 1.344(3)   | C(5)–H(5d)     | 0.9800     |
| N(5)–C(7)      | 1.403(3)   | C(1S)–C(1S)#2) | 1.346(8)   |
| N(5)–H(5a)     | 0.8800     | C(1S)–C(2S)    | 1.374(5)   |
| N(6)–C(19)     | 1.331(3)   | C(1S)–H(1Sa)   | 0.9500     |
| N(6)–C(14)     | 1.406(3)   | C(2S)–C(3S)    | 1.371(5)   |
| N(6)–H(6a)     | 0.8800     | C(2S)–H(2Sa)   | 0.9500     |
| O(1)–O(2b)#1)  | 1.13(2)    | C(3S)–C(3S)#2) | 1.411(7)   |
| O(1)–O(2b)     | 1.13(2)    | C(3S)–H(3Sa)   | 0.9500     |
| O(1)–O(2a)     | 1.131(5)   | C(21a)–C(22a)  | 1.5069     |
| O(1)–O(2a)#1)  | 1.131(5)   | C(21a)–C(24a)  | 1.5070     |
| O(2a)–O(2a)#1) | 1.798(12)  | C(21a)–C(23a)  | 1.5070     |
| O(2b)–O(2b)#1) | 1.76(5)    | C(22a)–H(22a)  | 0.9800     |
| O(3)–C(12)     | 1.217(3)   | C(22a)–H(22b)  | 0.9800     |
| O(4)–C(19)     | 1.212(3)   | C(22a)–H(22C)  | 0.9800     |
| C(a1)–C(m2#1)  | 1.380(3)   | C(23a)–H(23a)  | 0.9800     |
| C(a1)–C(b1)    | 1.436(3)   | C(23a)–H(23b)  | 0.9800     |
| C(a2)–C(m1)    | 1.386(3)   | C(23a)–H(23C)  | 0.9800     |
| C(a2)–C(b2)    | 1.430(3)   | C(24a)–H(24a)  | 0.9800     |
| C(a3)–C(m1)    | 1.382(3)   | C(24a)–H(24b)  | 0.9800     |
| C(a3)–C(b3)    | 1.434(3)   | C(24a)–H(24C)  | 0.9800     |
| C(a4)–C(m2)    | 1.391(3)   | C(21b)–C(24b)  | 1.5068     |
| C(a4)–C(b4)    | 1.426(3)   | C(21b)–C(22b)  | 1.5069     |
| C(b1)–C(b2)    | 1.332(3)   | C(21b)–C(23b)  | 1.5072     |



**Table S15.** Continued

| bond          | length (Å) | bond          | length (Å) |
|---------------|------------|---------------|------------|
| C(b1)–H(ba)   | 0.9500     | C(22b)–H(22d) | 0.9800     |
| C(b2)–H(bb)   | 0.9500     | C(22b)–H(22e) | 0.9800     |
| C(b3)–C(b4)   | 1.336(3)   | C(22b)–H(22F) | 0.9800     |
| C(b3)–H(bC)   | 0.9500     | C(23b)–H(23d) | 0.9800     |
| C(b4)–H(bd)   | 0.9500     | C(23b)–H(23e) | 0.9800     |
| C(m1)–C(6)    | 1.497(3)   | C(23b)–H(23F) | 0.9800     |
| C(m2)–C(a1#1) | 1.380(3)   | C(24b)–H(24d) | 0.9800     |
| C(m2)–C(13)   | 1.497(3)   | C(24b)–H(24e) | 0.9800     |
| C(6)–C(11)    | 1.384(3)   | C(24b)–H(24F) | 0.9800     |
| C(6)–C(7)     | 1.392(3)   | C(20a)–C(25a) | 1.5069     |
| C(7)–C(8)     | 1.396(3)   | C(20a)–C(27a) | 1.5070     |
| C(8)–C(9)     | 1.367(4)   | C(20a)–C(26a) | 1.5070     |
| C(8)–H(8a)    | 0.9500     | C(25a)–H(25a) | 0.9800     |
| C(9)–C(10)    | 1.358(5)   | C(25a)–H(25b) | 0.9800     |
| C(9)–H(9a)    | 0.9500     | C(25a)–H(25C) | 0.9800     |
| C(10)–C(11)   | 1.377(4)   | C(26a)–H(26a) | 0.9800     |
| C(10)–H(10a)  | 0.9500     | C(26a)–H(26b) | 0.9800     |
| C(11)–H(11a)  | 0.9500     | C(26a)–H(26C) | 0.9800     |
| C(12)–C(20b)  | 1.514(6)   | C(27a)–H(27a) | 0.9800     |
| C(12)–C(20a)  | 1.544(7)   | C(27a)–H(27b) | 0.9800     |
| C(13)–C(14)   | 1.384(4)   | C(27a)–H(27C) | 0.9800     |
| C(13)–C(18)   | 1.386(3)   | C(20b)–C(27b) | 1.5068     |
| C(14)–C(15)   | 1.389(3)   | C(20b)–C(26b) | 1.5069     |
| C(15)–C(16)   | 1.389(4)   | C(20b)–C(25b) | 1.5072     |
| C(15)–H(15a)  | 0.9500     | C(25b)–H(25d) | 0.9800     |
| C(16)–C(17)   | 1.355(4)   | C(25b)–H(25e) | 0.9800     |
| C(16)–H(16a)  | 0.9500     | C(25b)–H(25F) | 0.9800     |
| C(17)–C(18)   | 1.381(4)   | C(26b)–H(26d) | 0.9800     |
| C(17)–H(17a)  | 0.9500     | C(26b)–H(26e) | 0.9800     |
| C(18)–H(18a)  | 0.9500     | C(26b)–H(26F) | 0.9800     |
| C(19)–C(21b)  | 1.470(9)   | C(27b)–H(27d) | 0.9800     |
| C(19)–C(21a)  | 1.581(6)   | C(27b)–H(27e) | 0.9800     |
| N(3)–C(1)     | 1.3103     | C(27b)–H(27F) | 0.9800     |
| N(3)–C(3)     | 1.3810     |               |            |

**Table S15.** Continued

| bond      | length (Å) | bond | length (Å) |
|-----------|------------|------|------------|
| C(1)–N(4) | 1.3561     |      |            |

<sup>a</sup>The estimated standard deviations of the least significant digits are given in parentheses.

**Table S16.** Bond Angles for [Co(TpivPP)(1-EtIm)(O<sub>2</sub>)]·C<sub>6</sub>H<sub>6</sub> (200 K, C2/c form)<sup>a</sup>

| angle               | degree     | angle                | degree   |
|---------------------|------------|----------------------|----------|
| O(1)–Co(1)–N(2)#1   | 88.98(5)   | N(4)–C(1)–H(1a)      | 125.0    |
| O(1)–Co(1)–N(2)     | 88.98(5)   | C(2)–N(4)–C(1)       | 108.6    |
| N(2)#1–Co(1)–N(2)   | 177.95(10) | C(2)–N(4)–C(4)       | 128.3    |
| O(1)–Co(1)–N(1)     | 89.60(5)   | C(1)–N(4)–C(4)       | 122.8    |
| N(2)#1–Co(1)–N(1)   | 89.92(7)   | N(4)–C(2)–C(3)       | 106.1    |
| N(2)–Co(1)–N(1)     | 90.07(7)   | N(4)–C(2)–H(2a)      | 127.0    |
| O(1)–Co(1)–N(1)#1   | 89.60(5)   | C(3)–C(2)–H(2a)      | 127.0    |
| N(2)#1–Co(1)–N(1)#1 | 90.07(7)   | C(2)–C(3)–N(3)       | 109.6    |
| N(2)–Co(1)–N(1)#1   | 89.92(7)   | C(2)–C(3)–H(3a)      | 125.2    |
| N(1)–Co(1)–N(1)#1   | 179.20(10) | N(3)–C(3)–H(3a)      | 125.2    |
| O(1)–Co(1)–N(3)#1   | 173.71(8)  | N(4)–C(4)–C(5)       | 111.2    |
| N(2)#1–Co(1)–N(3)#1 | 85.12(12)  | N(4)–C(4)–H(4a)      | 109.4    |
| N(2)–Co(1)–N(3)#1   | 96.93(12)  | C(5)–C(4)–H(4a)      | 109.4    |
| N(1)–Co(1)–N(3)#1   | 88.23(19)  | N(4)–C(4)–H(4b)      | 109.4    |
| N(1)#1–Co(1)–N(3)#1 | 92.6(2)    | C(5)–C(4)–H(4b)      | 109.4    |
| O(1)–Co(1)–N(3)     | 173.71(8)  | H(4a)–C(4)–H(4b)     | 108.0    |
| N(2)#1–Co(1)–N(3)   | 96.93(12)  | C(4)–C(5)–H(5b)      | 109.5    |
| N(2)–Co(1)–N(3)     | 85.12(12)  | C(4)–C(5)–H(5C)      | 109.5    |
| N(1)–Co(1)–N(3)     | 92.56(19)  | H(5b)–C(5)–H(5C)     | 109.5    |
| N(1)#1–Co(1)–N(3)   | 88.23(19)  | C(4)–C(5)–H(5d)      | 109.5    |
| N(3)#1–Co(1)–N(3)   | 12.58(17)  | H(5b)–C(5)–H(5d)     | 109.5    |
| C(a1)–N(1)–C(a2)    | 105.29(17) | H(5C)–C(5)–H(5d)     | 109.5    |
| C(a1)–N(1)–Co(1)    | 127.50(15) | C(1S)#2–C(1S)–C(2S)  | 120.3(2) |
| C(a2)–N(1)–Co(1)    | 127.21(14) | C(1S)#2–C(1S)–H(1Sa) | 119.8    |
| C(a3)–N(2)–C(a4)    | 105.00(18) | C(2S)–C(1S)–H(1Sa)   | 119.8    |
| C(a3)–N(2)–Co(1)    | 127.55(15) | C(3S)–C(2S)–C(1S)    | 120.9(4) |
| C(a4)–N(2)–Co(1)    | 127.45(15) | C(3S)–C(2S)–H(2Sa)   | 119.6    |
| C(12)–N(5)–C(7)     | 128.3(2)   | C(1S)–C(2S)–H(2Sa)   | 119.6    |
| C(12)–N(5)–H(5a)    | 115.9      | C(2S)–C(3S)–C(3S)#2  | 118.8(2) |
| C(7)–N(5)–H(5a)     | 115.9      | C(2S)–C(3S)–H(3Sa)   | 120.6    |
| C(19)–N(6)–C(14)    | 131.0(2)   | C(3S)#2–C(3S)–H(3Sa) | 120.6    |
| C(19)–N(6)–H(6a)    | 114.5      | C(22a)–C(21a)–C(24a) | 109.5    |
| C(14)–N(6)–H(6a)    | 114.5      | C(22a)–C(21a)–C(23a) | 109.5    |
| O(2b)#1–O(1)–O(2b)  | 103(3)     | C(24a)–C(21a)–C(23a) | 109.5    |

Table S16. Continued

| angle                | degree     | angle                | degree    |
|----------------------|------------|----------------------|-----------|
| O(2b)#1–O(1)–O(2a)   | 78.7(18)   | C(22a)–C(21a)–C(19)  | 110.1(4)  |
| O(2b)–O(1)–O(2a)     | 56(2)      | C(24a)–C(21a)–C(19)  | 103.0(4)  |
| O(2b)#1–O(1)–O(2a)#1 | 56(2)      | C(23a)–C(21a)–C(19)  | 115.0(4)  |
| O(2b)–O(1)–O(2a)#1   | 78.7(18)   | C(21a)–C(22a)–H(22a) | 109.5     |
| O(2a)–O(1)–O(2a)#1   | 105.3(6)   | C(21a)–C(22a)–H(22b) | 109.5     |
| O(2b)#1–O(1)–Co(1)   | 128.7(14)  | H(22a)–C(22a)–H(22b) | 109.5     |
| O(2b)–O(1)–Co(1)     | 128.7(14)  | C(21a)–C(22a)–H(22C) | 109.5     |
| O(2a)–O(1)–Co(1)     | 127.4(3)   | H(22a)–C(22a)–H(22C) | 109.5     |
| O(2a)#1–O(1)–Co(1)   | 127.4(3)   | H(22b)–C(22a)–H(22C) | 109.5     |
| O(1)–O(2a)–O(2a)#1   | 37.4(3)    | C(21a)–C(23a)–H(23a) | 109.5     |
| O(1)–O(2b)–O(2b)#1   | 38.7(14)   | C(21a)–C(23a)–H(23b) | 109.5     |
| N(1)–C(a1)–C(m2)#1   | 126.10(19) | H(23a)–C(23a)–H(23b) | 109.5     |
| N(1)–C(a1)–C(b1)     | 110.1(2)   | C(21a)–C(23a)–H(23C) | 109.5     |
| C(m2)#1–C(a1)–C(b1)  | 123.8(2)   | H(23a)–C(23a)–H(23C) | 109.5     |
| N(1)–C(a2)–C(m1)     | 126.00(19) | H(23b)–C(23a)–H(23C) | 109.5     |
| N(1)–C(a2)–C(b2)     | 110.1(2)   | C(21a)–C(24a)–H(24a) | 109.5     |
| C(m1)–C(a2)–C(b2)    | 123.9(2)   | C(21a)–C(24a)–H(24b) | 109.5     |
| N(2)–C(a3)–C(m1)     | 125.9(2)   | H(24a)–C(24a)–H(24b) | 109.5     |
| N(2)–C(a3)–C(b3)     | 110.36(19) | C(21a)–C(24a)–H(24C) | 109.5     |
| C(m1)–C(a3)–C(b3)    | 123.7(2)   | H(24a)–C(24a)–H(24C) | 109.5     |
| N(2)–C(a4)–C(m2)     | 125.7(2)   | H(24b)–C(24a)–H(24C) | 109.5     |
| N(2)–C(a4)–C(b4)     | 110.27(19) | C(19)–C(21b)–C(24b)  | 111.2(8)  |
| C(m2)–C(a4)–C(b4)    | 124.1(2)   | C(19)–C(21b)–C(22b)  | 101.5(10) |
| C(b2)–C(b1)–C(a1)    | 107.2(2)   | C(24b)–C(21b)–C(22b) | 109.5     |
| C(b2)–C(b1)–H(ba)    | 126.4      | C(19)–C(21b)–C(23b)  | 115.4(7)  |
| C(a1)–C(b1)–H(ba)    | 126.4      | C(24b)–C(21b)–C(23b) | 109.5     |
| C(b1)–C(b2)–C(a2)    | 107.4(2)   | C(22b)–C(21b)–C(23b) | 109.5     |
| C(b1)–C(b2)–H(bb)    | 126.3      | C(21b)–C(22b)–H(22d) | 109.5     |
| C(a2)–C(b2)–H(bb)    | 126.3      | C(21b)–C(22b)–H(22e) | 109.5     |
| C(b4)–C(b3)–C(a3)    | 106.8(2)   | H(22d)–C(22b)–H(22e) | 109.5     |
| C(b4)–C(b3)–H(bc)    | 126.6      | C(21b)–C(22b)–H(22F) | 109.5     |
| C(a3)–C(b3)–H(bc)    | 126.6      | H(22d)–C(22b)–H(22f) | 109.5     |
| C(b3)–C(b4)–C(a4)    | 107.6(2)   | H(22e)–C(22b)–H(22f) | 109.5     |
| C(b3)–C(b4)–H(bd)    | 126.2      | C(21b)–C(23b)–H(23d) | 109.5     |

**Table S16.** Continued

| angle               | degree     | angle                | degree   |
|---------------------|------------|----------------------|----------|
| C(a4)–C(b4)–H(bd)   | 126.2      | C(21b)–C(23b)–H(23e) | 109.5    |
| C(a3)–C(m1)–C(a2)   | 123.2(2)   | H(23d)–C(23b)–H(23e) | 109.5    |
| C(a3)–C(m1)–C(6)    | 118.2(2)   | C(21b)–C(23b)–H(23F) | 109.5    |
| C(a2)–C(m1)–C(6)    | 118.6(2)   | H(23d)–C(23b)–H(23f) | 109.5    |
| C(a1#1)–C(m2)–C(a4) | 123.0(2)   | H(23e)–C(23b)–H(23f) | 109.5    |
| C(a1#1)–C(m2)–C(13) | 118.91(19) | C(21b)–C(24b)–H(24d) | 109.5    |
| C(a4)–C(m2)–C(13)   | 118.0(2)   | C(21b)–C(24b)–H(24e) | 109.5    |
| C(11)–C(6)–C(7)     | 118.4(2)   | H(24d)–C(24b)–H(24e) | 109.5    |
| C(11)–C(6)–C(m1)    | 119.2(2)   | C(21b)–C(24b)–H(24F) | 109.5    |
| C(7)–C(6)–C(m1)     | 122.4(2)   | H(24d)–C(24b)–H(24f) | 109.5    |
| C(6)–C(7)–C(8)      | 119.9(3)   | H(24e)–C(24b)–H(24f) | 109.5    |
| C(6)–C(7)–N(5)      | 118.0(2)   | C(25a)–C(20a)–C(27a) | 109.5    |
| C(8)–C(7)–N(5)      | 122.1(2)   | C(25a)–C(20a)–C(26a) | 109.5    |
| C(9)–C(8)–C(7)      | 119.8(3)   | C(27a)–C(20a)–C(26a) | 109.5    |
| C(9)–C(8)–H(8a)     | 120.1      | C(25a)–C(20a)–C(12)  | 107.3(7) |
| C(7)–C(8)–H(8a)     | 120.1      | C(27a)–C(20a)–C(12)  | 108.1(5) |
| C(10)–C(9)–C(8)     | 120.9(3)   | C(26a)–C(20a)–C(12)  | 113.0(5) |
| C(10)–C(9)–H(9a)    | 119.6      | C(20a)–C(25a)–H(25a) | 109.5    |
| C(8)–C(9)–H(9a)     | 119.6      | C(20a)–C(25a)–H(25b) | 109.5    |
| C(9)–C(10)–C(11)    | 119.9(3)   | H(25a)–C(25a)–H(25b) | 109.5    |
| C(9)–C(10)–H(10a)   | 120.1      | C(20a)–C(25a)–H(25C) | 109.5    |
| C(11)–C(10)–H(10a)  | 120.1      | H(25a)–C(25a)–H(25C) | 109.5    |
| C(10)–C(11)–C(6)    | 121.1(3)   | H(25b)–C(25a)–H(25C) | 109.5    |
| C(10)–C(11)–H(11a)  | 119.4      | C(20a)–C(26a)–H(26a) | 109.5    |
| C(6)–C(11)–H(11a)   | 119.4      | C(20a)–C(26a)–H(26b) | 109.5    |
| O(3)–C(12)–N(5)     | 122.6(3)   | H(26a)–C(26a)–H(26b) | 109.5    |
| O(3)–C(12)–C(20b)   | 119.7(3)   | C(20a)–C(26a)–H(26C) | 109.5    |
| N(5)–C(12)–C(20b)   | 117.0(3)   | H(26a)–C(26a)–H(26C) | 109.5    |
| O(3)–C(12)–C(20a)   | 121.1(3)   | H(26b)–C(26a)–H(26C) | 109.5    |
| N(5)–C(12)–C(20a)   | 115.8(3)   | C(20a)–C(27a)–H(27a) | 109.5    |
| C(20b)–C(12)–C(20a) | 15.2(3)    | C(20a)–C(27a)–H(27b) | 109.5    |
| C(14)–C(13)–C(18)   | 119.3(2)   | H(27a)–C(27a)–H(27b) | 109.5    |
| C(14)–C(13)–C(m2)   | 120.5(2)   | C(20a)–C(27a)–H(27C) | 109.5    |
| C(18)–C(13)–C(m2)   | 120.2(2)   | H(27a)–C(27a)–H(27C) | 109.5    |

**Table S16.** Continued

| angle               | degree     | angle                | degree   |
|---------------------|------------|----------------------|----------|
| C(13)–C(14)–C(15)   | 120.4(2)   | H(27b)–C(27a)–H(27c) | 109.5    |
| C(13)–C(14)–N(6)    | 116.9(2)   | C(27b)–C(20b)–C(26b) | 109.5    |
| C(15)–C(14)–N(6)    | 122.7(2)   | C(27b)–C(20b)–C(25b) | 109.5    |
| C(16)–C(15)–C(14)   | 118.6(3)   | C(26b)–C(20b)–C(25b) | 109.5    |
| C(16)–C(15)–H(15a)  | 120.7      | C(27b)–C(20b)–C(12)  | 111.1(4) |
| C(14)–C(15)–H(15a)  | 120.7      | C(26b)–C(20b)–C(12)  | 102.8(4) |
| C(17)–C(16)–C(15)   | 121.6(3)   | C(25b)–C(20b)–C(12)  | 114.3(5) |
| C(17)–C(16)–H(16a)  | 119.2      | C(20b)–C(25b)–H(25d) | 109.5    |
| C(15)–C(16)–H(16a)  | 119.2      | C(20b)–C(25b)–H(25e) | 109.5    |
| C(16)–C(17)–C(18)   | 119.6(3)   | H(25d)–C(25b)–H(25e) | 109.5    |
| C(16)–C(17)–H(17a)  | 120.2      | C(20b)–C(25b)–H(25f) | 109.5    |
| C(18)–C(17)–H(17a)  | 120.2      | H(25d)–C(25b)–H(25f) | 109.5    |
| C(17)–C(18)–C(13)   | 120.5(3)   | H(25e)–C(25b)–H(25f) | 109.5    |
| C(17)–C(18)–H(18a)  | 119.7      | C(20b)–C(26b)–H(26d) | 109.5    |
| C(13)–C(18)–H(18a)  | 119.7      | C(20b)–C(26b)–H(26e) | 109.5    |
| O(4)–C(19)–N(6)     | 122.8(3)   | H(26d)–C(26b)–H(26e) | 109.5    |
| O(4)–C(19)–C(21b)   | 117.4(5)   | C(20b)–C(26b)–H(26f) | 109.5    |
| N(6)–C(19)–C(21b)   | 119.2(4)   | H(26d)–C(26b)–H(26f) | 109.5    |
| O(4)–C(19)–C(21a)   | 123.5(3)   | H(26e)–C(26b)–H(26f) | 109.5    |
| N(6)–C(19)–C(21a)   | 113.6(3)   | C(20b)–C(27b)–H(27d) | 109.5    |
| C(21b)–C(19)–C(21a) | 11.4(5)    | C(20b)–C(27b)–H(27e) | 109.5    |
| C(1)–N(3)–C(3)      | 105.8      | H(27d)–C(27b)–H(27e) | 109.5    |
| C(1)–N(3)–Co(1)     | 124.20(16) | C(20b)–C(27b)–H(27f) | 109.5    |
| C(3)–N(3)–Co(1)     | 129.87(15) | H(27d)–C(27b)–H(27f) | 109.5    |
| N(3)–C(1)–N(4)      | 110.0      | H(27e)–C(27b)–H(27f) | 109.5    |
| N(3)–C(1)–H(1a)     | 125.0      |                      |          |

<sup>a</sup>The estimated standard deviations of the least significant digits are given in parentheses.

**Table S17.** Anisotropic Displacement Parameters ( $\text{\AA}^2$ ) for  $[\text{Co}(\text{TpivPP})(1\text{-EtIm})(\text{O}_2)]\cdot\text{C}_6\text{H}_6$  (200 K,  $C2/c$  form)<sup>a</sup>

| atom  | $U_{11}$   | $U_{22}$   | $U_{33}$   | $U_{23}$    | $U_{13}$    | $U_{12}$    |
|-------|------------|------------|------------|-------------|-------------|-------------|
| Co(1) | 0.0416(3)  | 0.0350(2)  | 0.0366(2)  | 0.000       | -0.0025(2)  | 0.000       |
| N(1)  | 0.0432(10) | 0.0351(9)  | 0.0389(9)  | -0.0002(7)  | -0.0016(8)  | -0.0017(8)  |
| N(2)  | 0.0436(11) | 0.0420(10) | 0.0411(9)  | -0.0062(8)  | -0.0038(8)  | 0.0023(8)   |
| N(5)  | 0.0413(12) | 0.0592(14) | 0.0934(16) | -0.0109(12) | -0.0124(11) | -0.0008(10) |
| N(6)  | 0.0937(17) | 0.0625(14) | 0.0332(9)  | -0.0063(9)  | 0.0090(10)  | -0.0013(12) |
| O(1)  | 0.0713(18) | 0.0391(13) | 0.0592(16) | 0.000       | 0.0068(14)  | 0.000       |
| O(2A) | 0.077(5)   | 0.045(3)   | 0.072(5)   | 0.004(2)    | -0.008(3)   | 0.011(3)    |
| O(2B) | 0.14(4)    | 0.045(13)  | 0.072(18)  | 0.037(11)   | 0.046(18)   | 0.017(15)   |
| O(3)  | 0.0602(14) | 0.0892(16) | 0.139(2)   | -0.0117(14) | -0.0176(13) | -0.0155(12) |
| O(4)  | 0.160(2)   | 0.0923(16) | 0.0502(11) | 0.0089(11)  | 0.0209(13)  | -0.0018(16) |
| C(A1) | 0.0485(13) | 0.0409(11) | 0.0381(11) | 0.0038(9)   | -0.0027(9)  | -0.0058(10) |
| C(A2) | 0.0464(13) | 0.0388(11) | 0.0420(11) | 0.0007(9)   | -0.0047(10) | 0.0006(10)  |
| C(A3) | 0.0406(12) | 0.0438(12) | 0.0458(12) | -0.0066(9)  | 0.0002(9)   | 0.0027(10)  |
| C(A4) | 0.0464(13) | 0.0495(13) | 0.0411(11) | -0.0075(10) | 0.0004(9)   | 0.0067(11)  |
| C(B1) | 0.0527(15) | 0.0583(14) | 0.0399(11) | 0.0042(10)  | -0.0026(10) | -0.0047(12) |
| C(B2) | 0.0507(15) | 0.0609(15) | 0.0406(11) | -0.0002(10) | -0.0079(10) | -0.0028(12) |
| C(B3) | 0.0403(13) | 0.0688(17) | 0.0504(13) | -0.0063(11) | 0.0004(10)  | 0.0041(11)  |
| C(B4) | 0.0457(14) | 0.0770(18) | 0.0454(13) | -0.0123(12) | 0.0051(11)  | 0.0056(12)  |
| C(M1) | 0.0429(13) | 0.0430(12) | 0.0455(12) | -0.0015(9)  | -0.0039(10) | 0.0005(10)  |
| C(M2) | 0.0501(14) | 0.0470(13) | 0.0387(11) | -0.0073(9)  | -0.0004(10) | 0.0058(10)  |
| C(6)  | 0.0456(13) | 0.0579(14) | 0.0406(11) | 0.0027(10)  | -0.0023(10) | 0.0048(11)  |
| C(7)  | 0.0434(14) | 0.0670(16) | 0.0537(14) | -0.0033(12) | -0.0082(11) | 0.0044(12)  |
| C(8)  | 0.0482(16) | 0.096(2)   | 0.0684(17) | -0.0047(15) | -0.0181(13) | 0.0020(15)  |
| C(9)  | 0.0517(17) | 0.111(3)   | 0.0634(17) | 0.0123(17)  | -0.0134(13) | 0.0192(18)  |
| C(10) | 0.065(2)   | 0.091(2)   | 0.0704(18) | 0.0231(17)  | 0.0016(15)  | 0.0305(17)  |
| C(11) | 0.0585(16) | 0.0610(16) | 0.0621(15) | 0.0083(12)  | 0.0005(12)  | 0.0119(13)  |
| C(12) | 0.0545(17) | 0.0672(17) | 0.0656(16) | -0.0123(14) | -0.0043(13) | -0.0031(14) |
| C(13) | 0.0431(13) | 0.0668(16) | 0.0420(11) | -0.0131(11) | -0.0019(10) | 0.0080(11)  |
| C(14) | 0.0518(15) | 0.0700(17) | 0.0367(11) | -0.0107(11) | 0.0006(10)  | 0.0039(12)  |
| C(15) | 0.0614(17) | 0.087(2)   | 0.0415(12) | -0.0126(13) | 0.0037(11)  | 0.0023(14)  |
| C(16) | 0.0531(17) | 0.112(3)   | 0.0459(14) | -0.0279(16) | 0.0035(12)  | 0.0150(16)  |
| C(17) | 0.0603(18) | 0.088(2)   | 0.0590(16) | -0.0361(16) | -0.0031(13) | 0.0175(16)  |
| C(18) | 0.0583(16) | 0.0669(16) | 0.0555(14) | -0.0200(12) | -0.0035(12) | 0.0102(13)  |
| C(19) | 0.0658(18) | 0.0722(18) | 0.0442(13) | 0.0006(12)  | -0.0035(12) | -0.0004(14) |

**Table S17.** Continued

| atom   | $U_{11}$  | $U_{22}$   | $U_{33}$  | $U_{23}$   | $U_{13}$    | $U_{12}$  |
|--------|-----------|------------|-----------|------------|-------------|-----------|
| N(3)   | 0.033(3)  | 0.0417(16) | 0.030(3)  | -0.001(2)  | 0.0023(19)  | -0.006(2) |
| C(1)   | 0.040(4)  | 0.049(3)   | 0.036(3)  | 0.004(2)   | 0.006(2)    | -0.001(2) |
| N(4)   | 0.047(3)  | 0.0370(17) | 0.050(4)  | 0.0089(16) | -0.004(3)   | -0.004(2) |
| C(2)   | 0.053(3)  | 0.041(3)   | 0.046(3)  | 0.003(2)   | -0.001(3)   | 0.001(2)  |
| C(3)   | 0.043(4)  | 0.038(2)   | 0.041(3)  | 0.000(2)   | 0.008(2)    | 0.005(2)  |
| C(4)   | 0.061(3)  | 0.051(3)   | 0.083(4)  | 0.023(3)   | 0.012(3)    | -0.008(3) |
| C(5)   | 0.095(7)  | 0.046(3)   | 0.127(8)  | 0.027(4)   | -0.005(5)   | -0.006(3) |
| C(1S)  | 0.091(3)  | 0.118(3)   | 0.134(4)  | -0.011(3)  | -0.012(2)   | -0.002(2) |
| C(2S)  | 0.071(2)  | 0.135(3)   | 0.069(2)  | 0.001(2)   | -0.0036(16) | -0.015(2) |
| C(3S)  | 0.087(3)  | 0.115(3)   | 0.081(2)  | 0.012(2)   | 0.0015(18)  | 0.001(2)  |
| C(21A) | 0.042(3)  | 0.050(3)   | 0.057(4)  | -0.004(3)  | -0.001(2)   | -0.002(2) |
| C(22A) | 0.079(5)  | 0.077(4)   | 0.086(4)  | -0.005(3)  | -0.036(4)   | 0.029(3)  |
| C(23A) | 0.133(8)  | 0.063(3)   | 0.061(3)  | -0.015(2)  | 0.029(4)    | -0.003(4) |
| C(24A) | 0.049(4)  | 0.126(6)   | 0.122(8)  | -0.048(6)  | -0.011(4)   | -0.005(4) |
| C(21B) | 0.045(6)  | 0.077(8)   | 0.033(5)  | -0.004(5)  | 0.004(4)    | 0.009(5)  |
| C(22B) | 0.074(10) | 0.188(19)  | 0.094(11) | -0.082(11) | 0.013(8)    | 0.003(11) |
| C(23B) | 0.134(15) | 0.101(8)   | 0.043(5)  | -0.026(5)  | 0.006(7)    | -0.016(9) |
| C(24B) | 0.073(8)  | 0.121(12)  | 0.098(10) | -0.060(9)  | 0.033(7)    | -0.035(7) |
| C(20A) | 0.078(5)  | 0.057(4)   | 0.035(5)  | -0.004(3)  | 0.006(3)    | -0.013(4) |
| C(25A) | 0.116(9)  | 0.108(9)   | 0.075(5)  | 0.038(5)   | 0.056(5)    | 0.034(6)  |
| C(26A) | 0.099(7)  | 0.125(7)   | 0.053(4)  | -0.010(4)  | -0.007(4)   | 0.029(5)  |
| C(27A) | 0.120(7)  | 0.063(5)   | 0.158(12) | -0.014(5)  | -0.002(7)   | -0.018(5) |
| C(20B) | 0.069(5)  | 0.063(4)   | 0.040(4)  | 0.000(2)   | 0.003(3)    | 0.004(3)  |
| C(25B) | 0.082(6)  | 0.100(8)   | 0.249(15) | 0.061(8)   | 0.080(8)    | 0.053(5)  |
| C(26B) | 0.077(5)  | 0.139(8)   | 0.064(4)  | 0.012(5)   | 0.010(3)    | 0.024(5)  |
| C(27B) | 0.147(7)  | 0.093(5)   | 0.099(6)  | -0.043(4)  | -0.018(5)   | 0.039(5)  |

<sup>a</sup>The estimated standard deviations of the least significant digits are given in parentheses.

The anisotropic displacement factor exponent takes the form:  $-2 \pi [\text{h}^2 U_{11} + \dots + 2 \text{h k a}^* \text{ b}^* U_{12}]$ .



**Table S18.** Hydrogen Atom Coordinates and Equivalent Isotropic Displacement Parameters ( $\text{\AA}^2$ ) for  $[\text{Co}(\text{TpivPP})(1\text{-EtIm})(\text{O}_2)]\cdot\text{C}_6\text{H}_6$  (200 K,  $C2/c$  form)<sup>a</sup>

| atom   | $x$    | $y$    | $z$    | $U(\text{eq})$ |
|--------|--------|--------|--------|----------------|
| H(5A)  | 0.3062 | 0.7384 | 0.6327 | 0.078          |
| H(6A)  | 0.3998 | 0.7555 | 0.9511 | 0.076          |
| H(BA)  | 0.4499 | 0.8681 | 0.4785 | 0.060          |
| H(BB)  | 0.3298 | 0.8572 | 0.5332 | 0.061          |
| H(BC)  | 0.2304 | 0.8507 | 0.7996 | 0.064          |
| H(BD)  | 0.2853 | 0.8612 | 0.9208 | 0.067          |
| H(8A)  | 0.1264 | 0.7581 | 0.5844 | 0.085          |
| H(9A)  | 0.0631 | 0.8614 | 0.5895 | 0.091          |
| H(10A) | 0.1159 | 0.9601 | 0.6358 | 0.091          |
| H(11A) | 0.2347 | 0.9577 | 0.6749 | 0.073          |
| H(15A) | 0.3436 | 0.7786 | 1.1306 | 0.076          |
| H(16A) | 0.3372 | 0.8876 | 1.1860 | 0.085          |
| H(17A) | 0.3747 | 0.9860 | 1.1267 | 0.083          |
| H(18A) | 0.4176 | 0.9782 | 1.0084 | 0.072          |
| H(1A)  | 0.5602 | 0.9994 | 0.6811 | 0.050          |
| H(2A)  | 0.4323 | 1.1134 | 0.8078 | 0.056          |
| H(3A)  | 0.4158 | 0.9895 | 0.8380 | 0.049          |
| H(4A)  | 0.5057 | 1.1396 | 0.6444 | 0.078          |
| H(4B)  | 0.5830 | 1.1345 | 0.6829 | 0.078          |
| H(5B)  | 0.5323 | 1.2454 | 0.7040 | 0.134          |
| H(5C)  | 0.5407 | 1.2052 | 0.7795 | 0.134          |
| H(5D)  | 0.4635 | 1.2103 | 0.7410 | 0.134          |
| H(1SA) | 0.4577 | 0.4446 | 0.2047 | 0.172          |
| H(2SA) | 0.4125 | 0.5484 | 0.1603 | 0.110          |
| H(3SA) | 0.4542 | 0.6539 | 0.2048 | 0.142          |
| H(22A) | 0.4466 | 0.5369 | 0.9480 | 0.121          |
| H(22B) | 0.4209 | 0.5522 | 1.0292 | 0.121          |
| H(22C) | 0.4897 | 0.5915 | 0.9971 | 0.121          |
| H(23A) | 0.4292 | 0.6208 | 0.8532 | 0.128          |
| H(23B) | 0.4714 | 0.6795 | 0.8976 | 0.128          |
| H(23C) | 0.3913 | 0.6939 | 0.8689 | 0.128          |
| H(24A) | 0.3215 | 0.5650 | 0.9087 | 0.149          |
| H(24B) | 0.2883 | 0.6396 | 0.9270 | 0.149          |
| H(24C) | 0.2999 | 0.5838 | 0.9903 | 0.149          |

**Table S18.** Continued

| atom   | <i>x</i> | <i>y</i> | <i>z</i> | <i>U</i> (eq) |
|--------|----------|----------|----------|---------------|
| H(22D) | 0.4536   | 0.5792   | 1.0284   | 0.178         |
| H(22E) | 0.4891   | 0.6268   | 0.9671   | 0.178         |
| H(22F) | 0.4536   | 0.5539   | 0.9458   | 0.178         |
| H(23D) | 0.3266   | 0.6763   | 0.8803   | 0.139         |
| H(23E) | 0.3766   | 0.6128   | 0.8560   | 0.139         |
| H(23F) | 0.4122   | 0.6857   | 0.8774   | 0.139         |
| H(24D) | 0.2720   | 0.6030   | 0.9745   | 0.146         |
| H(24E) | 0.3220   | 0.5647   | 1.0329   | 0.146         |
| H(24F) | 0.3220   | 0.5395   | 0.9503   | 0.146         |
| H(25A) | 0.3740   | 0.6601   | 0.5971   | 0.149         |
| H(25B) | 0.3305   | 0.6096   | 0.5438   | 0.149         |
| H(25C) | 0.3847   | 0.5778   | 0.6026   | 0.149         |
| H(26A) | 0.2799   | 0.6167   | 0.7576   | 0.139         |
| H(26B) | 0.3434   | 0.6643   | 0.7267   | 0.139         |
| H(26C) | 0.3540   | 0.5820   | 0.7322   | 0.139         |
| H(27A) | 0.2130   | 0.5391   | 0.6756   | 0.171         |
| H(27B) | 0.2871   | 0.5044   | 0.6502   | 0.171         |
| H(27C) | 0.2329   | 0.5363   | 0.5913   | 0.171         |
| H(25D) | 0.3991   | 0.5957   | 0.6125   | 0.215         |
| H(25E) | 0.3801   | 0.6681   | 0.6505   | 0.215         |
| H(25F) | 0.3688   | 0.6589   | 0.5651   | 0.215         |
| H(26D) | 0.3218   | 0.5441   | 0.7060   | 0.140         |
| H(26E) | 0.2371   | 0.5595   | 0.7065   | 0.140         |
| H(26F) | 0.2924   | 0.6167   | 0.7361   | 0.140         |
| H(27D) | 0.3094   | 0.5213   | 0.5676   | 0.169         |
| H(27E) | 0.2657   | 0.5781   | 0.5220   | 0.169         |
| H(27F) | 0.2257   | 0.5340   | 0.5833   | 0.169         |

<sup>a</sup> *U*(eq) is defined as one third of the trace of the orthogonalized  $\mathbf{U}_{ij}$  tensor.

The estimated standard deviations of the least significant digits are given in parentheses.

## Supporting Information

**Table S19.** Complete Crystallographic Details for [Co(TpivPP)(1-EtIm)(O<sub>2</sub>)]·C<sub>6</sub>H<sub>6</sub> (300 K, C2/c form)

|                                                              |                                                                   |
|--------------------------------------------------------------|-------------------------------------------------------------------|
| formula                                                      | C <sub>75</sub> H <sub>78</sub> CoN <sub>10</sub> O <sub>6</sub>  |
| FW, amu                                                      | 1274.40                                                           |
| <i>a</i> , Å                                                 | 18.711(2)                                                         |
| <i>b</i> , Å                                                 | 19.566(3)                                                         |
| <i>c</i> , Å                                                 | 18.725(3)                                                         |
| $\beta$ , deg                                                | 90.824(5)                                                         |
| <i>V</i> , Å <sup>3</sup>                                    | 6854.6(17)                                                        |
| space group                                                  | C2/c                                                              |
| <i>Z</i>                                                     | 4                                                                 |
| D <sub>c</sub> , g/cm <sup>3</sup>                           | 1.235                                                             |
| F(000)                                                       | 2692                                                              |
| $\mu$ , mm <sup>-1</sup>                                     | 0.310                                                             |
| crystal dimensions, mm                                       | 0.39 × 0.26 × 0.19                                                |
| radiation                                                    | MoK $\alpha$ , $\bar{\lambda}$ = 0.71073 Å                        |
| temperature, K                                               | 300(2)                                                            |
| diffractometer                                               | Bruker Apex CCD                                                   |
| $\theta$ range for collected data, deg                       | 1.85–27.13                                                        |
| index range                                                  | –22 ≤ <i>h</i> ≤ 23<br>–24 ≤ <i>k</i> ≤ 24<br>–20 ≤ <i>l</i> ≤ 24 |
| total data collected                                         | 29027                                                             |
| absorption correction                                        | Semi-empirical from equiv                                         |
| relative transmission coefficients (I)                       | 0.9434 and 0.8887                                                 |
| unique data                                                  | 7495 ( <i>R</i> <sub>int</sub> = 0.0434)                          |
| unique observed data [ <i>I</i> > 2 $\sigma$ ( <i>I</i> )]   | 4242                                                              |
| refinement method                                            | Full-matrix least-squares on F <sup>2</sup>                       |
| data/restraints/parameters                                   | 7495/6/494                                                        |
| goodness-of-fit (pased on <i>F</i> <sup>2</sup> )            | 1.023                                                             |
| final <i>R</i> indices [ <i>I</i> > 2 $\sigma$ ( <i>I</i> )] | <i>R</i> <sub>1</sub> = 0.0606, <i>wR</i> <sub>2</sub> = 0.1755   |
| final <i>R</i> indices (all data)                            | <i>R</i> <sub>1</sub> = 0.1091, <i>wR</i> <sub>2</sub> = 0.2052   |

**Table S20.** Atomic Coordinates and Equivalent Isotropic Displacement Parameters ( $\text{\AA}^2$ ) for  $[\text{Co}(\text{TpivPP})(1\text{-EtIm})(\text{O}_2)]\cdot\text{C}_6\text{H}_6$  (300 K,  $C2/c$  form)<sup>a</sup>

| atom  | $x$         | $y$         | $z$         | $U(\text{eq})$ |
|-------|-------------|-------------|-------------|----------------|
| Co(1) | 0.5000      | 0.86313(2)  | 0.7500      | 0.0553(2)      |
| O(1)  | 0.5000      | 0.76386(18) | 0.7500      | 0.0941(10)     |
| O(2a) | 0.5430(7)   | 0.7283(4)   | 0.7710(7)   | 0.094(7)       |
| O(2b) | 0.4819(17)  | 0.7216(16)  | 0.7895(17)  | 0.263(16)      |
| O(3)  | 0.17269(19) | 0.6570(2)   | 0.6177(3)   | 0.1673(16)     |
| O(4)  | 0.3643(3)   | 0.6780(2)   | 1.08029(19) | 0.198(2)       |
| N(1)  | 0.45629(12) | 0.86168(10) | 0.65308(12) | 0.0578(5)      |
| N(2)  | 0.40367(12) | 0.86099(10) | 0.79237(12) | 0.0600(5)      |
| N(5)  | 0.25852(14) | 0.73505(16) | 0.63319(17) | 0.0953(9)      |
| N(6)  | 0.38987(18) | 0.75394(17) | 0.99673(15) | 0.1006(9)      |
| C(a1) | 0.49064(15) | 0.86545(14) | 0.58903(15) | 0.0634(7)      |
| C(a2) | 0.38465(15) | 0.85763(13) | 0.63575(15) | 0.0634(7)      |
| C(a3) | 0.33901(14) | 0.85664(14) | 0.75716(15) | 0.0621(7)      |
| C(a4) | 0.38698(15) | 0.86427(14) | 0.86354(16) | 0.0657(7)      |
| C(b1) | 0.44005(17) | 0.86356(16) | 0.53149(16) | 0.0760(8)      |
| C(b2) | 0.37514(17) | 0.85813(17) | 0.55995(16) | 0.0761(8)      |
| C(b3) | 0.28152(16) | 0.85630(17) | 0.80716(17) | 0.0783(9)      |
| C(b4) | 0.31098(16) | 0.86144(18) | 0.87207(18) | 0.0810(9)      |
| C(m1) | 0.32888(15) | 0.85552(14) | 0.68355(16) | 0.0645(7)      |
| C(m2) | 0.43591(16) | 0.86885(14) | 0.92000(15) | 0.0654(7)      |
| C(6)  | 0.25330(16) | 0.85553(17) | 0.65462(17) | 0.0737(8)      |
| C(7)  | 0.21984(16) | 0.7963(2)   | 0.63073(17) | 0.0820(9)      |
| C(8)  | 0.14953(19) | 0.7989(3)   | 0.6059(2)   | 0.1103(13)     |
| C(9)  | 0.1131(2)   | 0.8604(3)   | 0.6059(3)   | 0.1278(18)     |
| C(10) | 0.1449(3)   | 0.9179(3)   | 0.6299(3)   | 0.1246(17)     |
| C(11) | 0.2152(2)   | 0.9161(2)   | 0.6535(2)   | 0.0979(11)     |
| C(12) | 0.2352(2)   | 0.6704(2)   | 0.6295(2)   | 0.1011(12)     |
| C(13) | 0.40735(16) | 0.87515(18) | 0.99463(17) | 0.0773(9)      |
| C(14) | 0.38519(17) | 0.8178(2)   | 1.03205(16) | 0.0804(9)      |
| C(15) | 0.35876(19) | 0.8244(2)   | 1.10051(18) | 0.1004(12)     |
| C(16) | 0.3555(2)   | 0.8895(3)   | 1.1310(2)   | 0.1097(14)     |
| C(17) | 0.3786(2)   | 0.9457(3)   | 1.0951(2)   | 0.1087(13)     |
| C(18) | 0.40357(19) | 0.9390(2)   | 1.02663(19) | 0.0920(10)     |
| C(19) | 0.3805(2)   | 0.6913(3)   | 1.0182(2)   | 0.1063(13)     |

**Table S20.** Continued

| atom   | <i>x</i>    | <i>y</i>    | <i>z</i>    | <i>U</i> (eq) |
|--------|-------------|-------------|-------------|---------------|
| C(20)  | 0.2973(9)   | 0.6141(5)   | 0.6399(7)   | 0.096(9)      |
| C(21)  | 0.296(2)    | 0.5749(14)  | 0.5707(7)   | 0.26(3)       |
| C(22)  | 0.3707(8)   | 0.6439(9)   | 0.653(2)    | 0.22(2)       |
| C(23)  | 0.2793(10)  | 0.5666(13)  | 0.7005(9)   | 0.150(10)     |
| C(20b) | 0.2865(4)   | 0.6136(3)   | 0.6391(5)   | 0.107(5)      |
| C(21b) | 0.2523(6)   | 0.5463(5)   | 0.6198(13)  | 0.257(14)     |
| C(22b) | 0.3516(7)   | 0.6245(7)   | 0.5939(7)   | 0.170(7)      |
| C(23b) | 0.3084(9)   | 0.6130(9)   | 0.7168(4)   | 0.184(8)      |
| C(24)  | 0.3840(5)   | 0.6345(5)   | 0.9649(4)   | 0.092(5)      |
| C(25)  | 0.3238(6)   | 0.5862(7)   | 0.9817(8)   | 0.152(6)      |
| C(26)  | 0.4545(5)   | 0.5989(11)  | 0.9773(8)   | 0.208(10)     |
| C(27)  | 0.3781(11)  | 0.6565(5)   | 0.8879(4)   | 0.159(8)      |
| C(24b) | 0.3949(5)   | 0.6340(5)   | 0.9622(5)   | 0.093(6)      |
| C(25b) | 0.3222(6)   | 0.6159(12)  | 0.9321(11)  | 0.211(13)     |
| C(26b) | 0.4265(13)  | 0.5727(8)   | 0.9998(11)  | 0.219(13)     |
| C(27b) | 0.4431(13)  | 0.6553(6)   | 0.9024(11)  | 0.184(11)     |
| C(1S)  | 0.9727(4)   | 0.8810(5)   | 0.7248(4)   | 0.184(3)      |
| C(2S)  | 0.9481(4)   | 0.9442(8)   | 0.6991(4)   | 0.207(4)      |
| C(3S)  | 0.9764(5)   | 1.0078(8)   | 0.7271(6)   | 0.262(6)      |
| N(3)   | 0.5000      | 0.96770(12) | 0.7500      | 0.0742(9)     |
| C(1)   | 0.53113(14) | 1.01384(15) | 0.71360(15) | 0.086(3)      |
| N(4)   | 0.5085(2)   | 1.07727(13) | 0.7318(3)   | 0.079(3)      |
| C(2)   | 0.4579(2)   | 1.07118(14) | 0.7813(3)   | 0.078(2)      |
| C(3)   | 0.45089(16) | 1.00354(15) | 0.79369(19) | 0.092(3)      |
| C(4)   | 0.5322(3)   | 1.13965(17) | 0.6947(5)   | 0.119(3)      |
| C(5)   | 0.5138(4)   | 1.20371(12) | 0.7372(6)   | 0.214(6)      |

<sup>a</sup>*U*(eq) is defined as one third of the trace of the orthogonalized  $\mathbf{U}_{ij}$  tensor.

The estimated standard deviations of the least significant digits are given in parentheses.

**Table S21.** Bond Lengths for [Co(TpivPP)(1-EtIm)(O<sub>2</sub>)]·C<sub>6</sub>H<sub>6</sub> (300 K, C2/c form)<sup>a</sup>

| bond           | length (Å) | bond          | length (Å) |
|----------------|------------|---------------|------------|
| Co(1)–O(1)     | 1.942(4)   | C(22)–H(22a)  | 0.9600     |
| Co(1)–N(1)     | 1.980(2)   | C(22)–H(22b)  | 0.9600     |
| Co(1)–N(1)#1)  | 1.980(2)   | C(22)–H(22C)  | 0.9600     |
| Co(1)–N(2)     | 1.980(2)   | C(23)–H(23a)  | 0.9600     |
| Co(1)–N(2)#1)  | 1.980(2)   | C(23)–H(23b)  | 0.9600     |
| Co(1)–N(3)     | 2.046(2)   | C(23)–H(23C)  | 0.9600     |
| O(1)–O(2a)#1)  | 1.129(9)   | C(20b)–C(23b) | 1.5070     |
| O(1)–O(2a)     | 1.129(9)   | C(20b)–C(21b) | 1.5070     |
| O(1)–O(2b)     | 1.16(2)    | C(20b)–C(22b) | 1.5072     |
| O(1)–O(2b)#1)  | 1.16(2)    | C(21b)–H(21d) | 0.9600     |
| O(2a)–O(2a)#1) | 1.78(2)    | C(21b)–H(21e) | 0.9600     |
| O(2b)–O(2b)#1) | 1.64(5)    | C(21b)–H(21F) | 0.9600     |
| O(3)–C(12)     | 1.216(5)   | C(22b)–H(22d) | 0.9600     |
| O(4)–C(19)     | 1.234(5)   | C(22b)–H(22e) | 0.9600     |
| N(1)–C(a1)     | 1.371(4)   | C(22b)–H(22F) | 0.9600     |
| N(1)–C(a2)     | 1.377(3)   | C(23b)–H(23d) | 0.9600     |
| N(2)–C(a3)     | 1.372(3)   | C(23b)–H(23e) | 0.9600     |
| N(2)–C(a4)     | 1.375(4)   | C(23b)–H(23F) | 0.9600     |
| N(5)–C(12)     | 1.339(5)   | C(24)–C(25)   | 1.5068     |
| N(5)–C(7)      | 1.401(4)   | C(24)–C(26)   | 1.5068     |
| N(5)–H(5a)     | 0.8600     | C(24)–C(27)   | 1.5071     |
| N(6)–C(19)     | 1.303(5)   | C(25)–H(25a)  | 0.9600     |
| N(6)–C(14)     | 1.417(4)   | C(25)–H(25b)  | 0.9600     |
| N(6)–H(6a)     | 0.8600     | C(25)–H(25C)  | 0.9600     |
| C(a1)–C(m2#1)  | 1.389(4)   | C(26)–H(26a)  | 0.9600     |
| C(a1)–C(b1)    | 1.425(4)   | C(26)–H(26b)  | 0.9600     |
| C(a2)–C(m1)    | 1.385(4)   | C(26)–H(26C)  | 0.9600     |
| C(a2)–C(b2)    | 1.428(4)   | C(27)–H(27a)  | 0.9600     |
| C(a3)–C(m1)    | 1.389(4)   | C(27)–H(27b)  | 0.9600     |
| C(a3)–C(b3)    | 1.436(4)   | C(27)–H(27C)  | 0.9600     |
| C(a4)–C(m2)    | 1.391(4)   | C(24b)–C(27b) | 1.5068     |
| C(a4)–C(b4)    | 1.434(4)   | C(24b)–C(26b) | 1.5070     |
| C(b1)–C(b2)    | 1.338(5)   | C(24b)–C(25b) | 1.5070     |
| C(b1)–H(ba)    | 0.9300     | C(25b)–H(25d) | 0.9600     |

**Table S21.** Continued

| bond          | length (Å) | bond           | length (Å) |
|---------------|------------|----------------|------------|
| C(b2)–H(bb)   | 0.9300     | C(25b)–H(25e)  | 0.9600     |
| C(b3)–C(b4)   | 1.331(5)   | C(25b)–H(25F)  | 0.9600     |
| C(b3)–H(bC)   | 0.9300     | C(26b)–H(26d)  | 0.9600     |
| C(b4)–H(bd)   | 0.9300     | C(26b)–H(26e)  | 0.9600     |
| C(m1)–C(6)    | 1.507(4)   | C(26b)–H(26F)  | 0.9600     |
| C(m2)–C(a1#1) | 1.389(4)   | C(27b)–H(27d)  | 0.9600     |
| C(m2)–C(13)   | 1.508(4)   | C(27b)–H(27e)  | 0.9600     |
| C(6)–C(11)    | 1.383(5)   | C(27b)–H(27F)  | 0.9600     |
| C(6)–C(7)     | 1.388(5)   | C(1S)–C(1S)#2) | 1.381(15)  |
| C(7)–C(8)     | 1.390(5)   | C(1S)–C(2S)    | 1.402(12)  |
| C(8)–C(9)     | 1.382(7)   | C(1S)–H(1Sa)   | 0.9300     |
| C(8)–H(8a)    | 0.9300     | C(2S)–C(3S)    | 1.447(14)  |
| C(9)–C(10)    | 1.347(7)   | C(2S)–H(2Sa)   | 0.9300     |
| C(9)–H(9a)    | 0.9300     | C(3S)–C(3S)#2) | 1.220(19)  |
| C(10)–C(11)   | 1.381(6)   | C(3S)–H(3Sa)   | 0.9300     |
| C(10)–H(10a)  | 0.9300     | N(3)–C(1)#1)   | 1.277(2)   |
| C(11)–H(11a)  | 0.9300     | N(3)–C(1)      | 1.2769     |
| C(12)–C(20b)  | 1.479(8)   | N(3)–C(3)      | 1.4238     |
| C(12)–C(20)   | 1.613(14)  | N(3)–C(3)#1)   | 1.4238(19) |
| C(13)–C(18)   | 1.388(5)   | C(1)–N(4)      | 1.3563     |
| C(13)–C(14)   | 1.389(5)   | C(1)–H(1a)     | 0.9300     |
| C(14)–C(15)   | 1.387(4)   | N(4)–C(2)#1)   | 0.688(6)   |
| C(15)–C(16)   | 1.398(6)   | N(4)–N(4)#1)   | 0.757(9)   |
| C(15)–H(15a)  | 0.9300     | N(4)–C(2)      | 1.3405     |
| C(16)–C(17)   | 1.362(6)   | N(4)–C(4)      | 1.4762     |
| C(16)–H(16a)  | 0.9300     | N(4)–C(3)#1)   | 1.7019(13) |
| C(17)–C(18)   | 1.377(5)   | N(4)–C(1)#1)   | 1.777(2)   |
| C(17)–H(17a)  | 0.9300     | C(2)–C(3)      | 1.3502     |
| C(18)–H(18a)  | 0.9300     | C(2)–H(2a)     | 0.9300     |
| C(19)–C(24)   | 1.496(9)   | C(3)–H(3a)     | 0.9300     |
| C(19)–C(24b)  | 1.561(11)  | C(4)–C(5)      | 1.5274     |
| C(20)–C(21)   | 1.5068     | C(4)–H(4a)     | 0.9700     |
| C(20)–C(22)   | 1.5069     | C(4)–H(4b)     | 0.9700     |
| C(20)–C(23)   | 1.5070     | C(5)–H(5b)     | 0.9600     |

**Table S21.** Continued

| bond         | length (Å) | bond       | length (Å) |
|--------------|------------|------------|------------|
| C(21)–H(21a) | 0.9600     | C(5)–H(5C) | 0.9600     |
| C(21)–H(21b) | 0.9600     | C(5)–H(5d) | 0.9600     |
| C(21)–H(21C) | 0.9600     |            |            |

<sup>a</sup>The estimated standard deviations of the least significant digits are given in parentheses.



**Table S22.** Bond Angles for [Co(TpivPP)(1-EtIm)(O<sub>2</sub>)]·C<sub>6</sub>H<sub>6</sub> (300 K, C2/c form)<sup>a</sup>

| angle                | degree     | angle                | degree   |
|----------------------|------------|----------------------|----------|
| O(1)–Co(1)–N(1)      | 89.18(6)   | C(20)–C(23)–H(23C)   | 109.5    |
| O(1)–Co(1)–N(1)#1    | 89.18(6)   | H(23a)–C(23)–H(23C)  | 109.5    |
| N(1)–Co(1)–N(1)#1    | 178.36(12) | H(23b)–C(23)–H(23C)  | 109.5    |
| O(1)–Co(1)–N(2)      | 88.79(6)   | C(12)–C(20b)–C(23b)  | 106.9(6) |
| N(1)–Co(1)–N(2)      | 90.03(9)   | C(12)–C(20b)–C(21b)  | 110.8(6) |
| N(1)#1–Co(1)–N(2)    | 89.93(9)   | C(23b)–C(20b)–C(21b) | 109.5    |
| O(1)–Co(1)–N(2)#1    | 88.79(6)   | C(12)–C(20b)–C(22b)  | 110.7(6) |
| N(1)–Co(1)–N(2)#1    | 89.93(9)   | C(23b)–C(20b)–C(22b) | 109.5    |
| N(1)#1–Co(1)–N(2)#1  | 90.03(9)   | C(21b)–C(20b)–C(22b) | 109.5    |
| N(2)–Co(1)–N(2)#1    | 177.58(12) | C(20b)–C(21b)–H(21d) | 109.5    |
| O(1)–Co(1)–N(3)      | 180.000(1) | C(20b)–C(21b)–H(21e) | 109.5    |
| N(1)–Co(1)–N(3)      | 90.82(6)   | H(21d)–C(21b)–H(21e) | 109.5    |
| N(1)#1–Co(1)–N(3)    | 90.82(6)   | C(20b)–C(21b)–H(21F) | 109.5    |
| N(2)–Co(1)–N(3)      | 91.21(6)   | H(21d)–C(21b)–H(21f) | 109.5    |
| N(2)#1–Co(1)–N(3)    | 91.21(6)   | H(21e)–C(21b)–H(21f) | 109.5    |
| O(2a)#1–O(1)–O(2a)   | 104.0(11)  | C(20b)–C(22b)–H(22d) | 109.5    |
| O(2a)#1–O(1)–O(2b)   | 64.7(18)   | C(20b)–C(22b)–H(22e) | 109.5    |
| O(2a)–O(1)–O(2b)     | 63.4(13)   | H(22d)–C(22b)–H(22e) | 109.5    |
| O(2a)#1–O(1)–O(2b)#1 | 63.4(13)   | C(20b)–C(22b)–H(22F) | 109.5    |
| O(2a)–O(1)–O(2b)#1   | 64.7(18)   | H(22d)–C(22b)–H(22f) | 109.5    |
| O(2b)–O(1)–O(2b)#1   | 89(3)      | H(22e)–C(22b)–H(22f) | 109.5    |
| O(2a)#1–O(1)–Co(1)   | 128.0(6)   | C(20b)–C(23b)–H(23d) | 109.5    |
| O(2a)–O(1)–Co(1)     | 128.0(6)   | C(20b)–C(23b)–H(23e) | 109.5    |
| O(2b)–O(1)–Co(1)     | 135.3(17)  | H(23d)–C(23b)–H(23e) | 109.5    |
| O(2b)#1–O(1)–Co(1)   | 135.3(17)  | C(20b)–C(23b)–H(23F) | 109.5    |
| O(1)–O(2a)–O(2a)#1   | 38.0(6)    | H(23d)–C(23b)–H(23f) | 109.5    |
| O(1)–O(2b)–O(2b)#1   | 45.3(17)   | H(23e)–C(23b)–H(23f) | 109.5    |
| C(a1)–N(1)–C(a2)     | 105.3(2)   | C(19)–C(24)–C(25)    | 106.6(6) |
| C(a1)–N(1)–Co(1)     | 127.47(19) | C(19)–C(24)–C(26)    | 106.7(7) |
| C(a2)–N(1)–Co(1)     | 127.22(19) | C(25)–C(24)–C(26)    | 109.5    |
| C(a3)–N(2)–C(a4)     | 104.9(2)   | C(19)–C(24)–C(27)    | 115.0(6) |
| C(a3)–N(2)–Co(1)     | 127.60(19) | C(25)–C(24)–C(27)    | 109.5    |
| C(a4)–N(2)–Co(1)     | 127.46(19) | C(26)–C(24)–C(27)    | 109.5    |
| C(12)–N(5)–C(7)      | 129.7(3)   | C(24)–C(25)–H(25a)   | 109.5    |

**Table S22.** Continued

| angle               | degree   | angle                | degree   |
|---------------------|----------|----------------------|----------|
| C(12)–N(5)–H(5a)    | 115.2    | C(24)–C(25)–H(25b)   | 109.5    |
| C(7)–N(5)–H(5a)     | 115.2    | H(25a)–C(25)–H(25b)  | 109.5    |
| C(19)–N(6)–C(14)    | 132.6(3) | C(24)–C(25)–H(25C)   | 109.5    |
| C(19)–N(6)–H(6a)    | 113.7    | H(25a)–C(25)–H(25C)  | 109.5    |
| C(14)–N(6)–H(6a)    | 113.7    | H(25b)–C(25)–H(25C)  | 109.5    |
| N(1)–C(a1)–C(m2#1)  | 125.9(3) | C(24)–C(26)–H(26a)   | 109.5    |
| N(1)–C(a1)–C(b1)    | 110.2(3) | C(24)–C(26)–H(26b)   | 109.5    |
| C(m2#1)–C(a1)–C(b1) | 123.9(3) | H(26a)–C(26)–H(26b)  | 109.5    |
| N(1)–C(a2)–C(m1)    | 126.1(3) | C(24)–C(26)–H(26C)   | 109.5    |
| N(1)–C(a2)–C(b2)    | 109.9(3) | H(26a)–C(26)–H(26C)  | 109.5    |
| C(m1)–C(a2)–C(b2)   | 123.9(3) | H(26b)–C(26)–H(26C)  | 109.5    |
| N(2)–C(a3)–C(m1)    | 125.8(3) | C(24)–C(27)–H(27a)   | 109.5    |
| N(2)–C(a3)–C(b3)    | 110.5(3) | C(24)–C(27)–H(27b)   | 109.5    |
| C(m1)–C(a3)–C(b3)   | 123.7(3) | H(27a)–C(27)–H(27b)  | 109.5    |
| N(2)–C(a4)–C(m2)    | 125.7(3) | C(24)–C(27)–H(27C)   | 109.5    |
| N(2)–C(a4)–C(b4)    | 110.2(3) | H(27a)–C(27)–H(27C)  | 109.5    |
| C(m2)–C(a4)–C(b4)   | 124.1(3) | H(27b)–C(27)–H(27C)  | 109.5    |
| C(b2)–C(b1)–C(a1)   | 107.3(3) | C(27b)–C(24b)–C(26b) | 109.5    |
| C(b2)–C(b1)–H(ba)   | 126.3    | C(27b)–C(24b)–C(25b) | 109.5    |
| C(a1)–C(b1)–H(ba)   | 126.3    | C(26b)–C(24b)–C(25b) | 109.5    |
| C(b1)–C(b2)–C(a2)   | 107.2(3) | C(27b)–C(24b)–C(19)  | 114.3(7) |
| C(b1)–C(b2)–H(bb)   | 126.4    | C(26b)–C(24b)–C(19)  | 109.2(8) |
| C(a2)–C(b2)–H(bb)   | 126.4    | C(25b)–C(24b)–C(19)  | 104.9(8) |
| C(b4)–C(b3)–C(a3)   | 106.9(3) | C(24b)–C(25b)–H(25d) | 109.5    |
| C(b4)–C(b3)–H(bC)   | 126.6    | C(24b)–C(25b)–H(25e) | 109.5    |
| C(a3)–C(b3)–H(bC)   | 126.6    | H(25d)–C(25b)–H(25e) | 109.5    |
| C(b3)–C(b4)–C(a4)   | 107.4(3) | C(24b)–C(25b)–H(25F) | 109.5    |
| C(b3)–C(b4)–H(bd)   | 126.3    | H(25d)–C(25b)–H(25f) | 109.5    |
| C(a4)–C(b4)–H(bd)   | 126.3    | H(25e)–C(25b)–H(25f) | 109.5    |
| C(a2)–C(m1)–C(a3)   | 123.2(3) | C(24b)–C(26b)–H(26d) | 109.5    |
| C(a2)–C(m1)–C(6)    | 118.7(3) | C(24b)–C(26b)–H(26e) | 109.5    |
| C(a3)–C(m1)–C(6)    | 118.1(3) | H(26d)–C(26b)–H(26e) | 109.5    |
| C(a1#1)–C(m2)–C(a4) | 123.1(3) | C(24b)–C(26b)–H(26F) | 109.5    |
| C(a1#1)–C(m2)–C(13) | 118.8(3) | H(26d)–C(26b)–H(26f) | 109.5    |

**Table S22.** Continued

| angle              | degree   | angle                | degree     |
|--------------------|----------|----------------------|------------|
| C(a4)–C(m2)–C(13)  | 118.1(3) | H(26e)–C(26b)–H(26f) | 109.5      |
| C(11)–C(6)–C(7)    | 118.7(3) | C(24b)–C(27b)–H(27d) | 109.5      |
| C(11)–C(6)–C(m1)   | 119.1(3) | C(24b)–C(27b)–H(27e) | 109.5      |
| C(7)–C(6)–C(m1)    | 122.2(3) | H(27d)–C(27b)–H(27e) | 109.5      |
| C(6)–C(7)–C(8)     | 119.8(4) | C(24b)–C(27b)–H(27f) | 109.5      |
| C(6)–C(7)–N(5)     | 118.3(3) | H(27d)–C(27b)–H(27f) | 109.5      |
| C(8)–C(7)–N(5)     | 121.9(4) | H(27e)–C(27b)–H(27f) | 109.5      |
| C(9)–C(8)–C(7)     | 119.8(4) | C(1S)#2–C(1S)–C(2S)  | 118.0(6)   |
| C(9)–C(8)–H(8a)    | 120.1    | C(1S)#2–C(1S)–H(1Sa) | 121.0      |
| C(7)–C(8)–H(8a)    | 120.1    | C(2S)–C(1S)–H(1Sa)   | 121.0      |
| C(10)–C(9)–C(8)    | 120.7(4) | C(1S)–C(2S)–C(3S)    | 121.2(10)  |
| C(10)–C(9)–H(9a)   | 119.6    | C(1S)–C(2S)–H(2Sa)   | 119.4      |
| C(8)–C(9)–H(9a)    | 119.6    | C(3S)–C(2S)–H(2Sa)   | 119.4      |
| C(9)–C(10)–C(11)   | 120.0(4) | C(3S)#2–C(3S)–C(2S)  | 120.8(7)   |
| C(9)–C(10)–H(10a)  | 120.0    | C(3S)#2–C(3S)–H(3Sa) | 119.6      |
| C(11)–C(10)–H(10a) | 120.0    | C(2S)–C(3S)–H(3Sa)   | 119.6      |
| C(10)–C(11)–C(6)   | 121.0(4) | C(1)#1–N(3)–C(1)     | 90.01(10)  |
| C(10)–C(11)–H(11a) | 119.5    | C(1)#1–N(3)–C(3)     | 16.64(14)  |
| C(6)–C(11)–H(11a)  | 119.5    | C(1)–N(3)–C(3)       | 105.2      |
| O(3)–C(12)–N(5)    | 121.7(4) | C(1)#1–N(3)–C(3)#1   | 105.2      |
| O(3)–C(12)–C(20b)  | 118.8(5) | C(1)–N(3)–C(3)#1     | 16.64(11)  |
| N(5)–C(12)–C(20b)  | 119.5(4) | C(3)–N(3)–C(3)#1     | 121.0      |
| O(3)–C(12)–C(20)   | 124.3(6) | C(1)#1–N(3)–Co(1)    | 135.0      |
| N(5)–C(12)–C(20)   | 113.9(6) | C(1)–N(3)–Co(1)      | 135.00(10) |
| C(20b)–C(12)–C(20) | 5.6(6)   | C(3)–N(3)–Co(1)      | 119.51(9)  |
| C(18)–C(13)–C(14)  | 119.4(3) | C(3)#1–N(3)–Co(1)    | 119.5      |
| C(18)–C(13)–C(m2)  | 119.6(3) | N(3)–C(1)–N(4)       | 111.5      |
| C(14)–C(13)–C(m2)  | 120.9(3) | N(3)–C(1)–H(1a)      | 124.3      |
| C(15)–C(14)–C(13)  | 120.3(3) | N(4)–C(1)–H(1a)      | 124.3      |
| C(15)–C(14)–N(6)   | 122.6(4) | C(2)#1–N(4)–N(4)#1   | 136.1(16)  |
| C(13)–C(14)–N(6)   | 117.1(3) | C(2)#1–N(4)–C(2)     | 152.8(8)   |
| C(14)–C(15)–C(16)  | 118.7(4) | N(4)#1–N(4)–C(2)     | 20.9(8)    |
| C(14)–C(15)–H(15a) | 120.6    | C(2)#1–N(4)–C(1)     | 57.46(18)  |
| C(16)–C(15)–H(15a) | 120.6    | N(4)#1–N(4)–C(1)     | 111.30(15) |

**Table S22.** Continued

| angle               | degree    | angle              | degree    |
|---------------------|-----------|--------------------|-----------|
| C(17)–C(16)–C(15)   | 121.2(4)  | C(2)–N(4)–C(1)     | 108.6     |
| C(17)–C(16)–H(16a)  | 119.4     | C(2)#1–N(4)–C(4)   | 72.1(3)   |
| C(15)–C(16)–H(16a)  | 119.4     | N(4)#1–N(4)–C(4)   | 123.90(7) |
| C(16)–C(17)–C(18)   | 119.8(4)  | C(2)–N(4)–C(4)     | 128.3     |
| C(16)–C(17)–H(17a)  | 120.1     | C(1)–N(4)–C(4)     | 122.8     |
| C(18)–C(17)–H(17a)  | 120.1     | C(2)#1–N(4)–C(3)#1 | 48.68(12) |
| C(17)–C(18)–C(13)   | 120.5(4)  | N(4)#1–N(4)–C(3)#1 | 116.6(3)  |
| C(17)–C(18)–H(18a)  | 119.7     | C(2)–N(4)–C(3)#1   | 116.19(7) |
| C(13)–C(18)–H(18a)  | 119.7     | C(1)–N(4)–C(3)#1   | 8.80(13)  |
| O(4)–C(19)–N(6)     | 121.7(4)  | C(4)–N(4)–C(3)#1   | 115.50(8) |
| O(4)–C(19)–C(24)    | 119.1(5)  | C(2)#1–N(4)–C(1)#1 | 118.4(4)  |
| N(6)–C(19)–C(24)    | 119.1(4)  | N(4)#1–N(4)–C(1)#1 | 45.32(11) |
| O(4)–C(19)–C(24b)   | 121.9(6)  | C(2)–N(4)–C(1)#1   | 40.07(7)  |
| N(6)–C(19)–C(24b)   | 116.3(5)  | C(1)–N(4)–C(1)#1   | 68.89(7)  |
| C(24)–C(19)–C(24b)  | 7.5(5)    | C(4)–N(4)–C(1)#1   | 168.32(7) |
| C(21)–C(20)–C(22)   | 109.5     | C(3)#1–N(4)–C(1)#1 | 76.2      |
| C(21)–C(20)–C(23)   | 109.5     | N(4)–C(2)–C(3)     | 106.1     |
| C(22)–C(20)–C(23)   | 109.5     | N(4)–C(2)–H(2a)    | 127.0     |
| C(21)–C(20)–C(12)   | 104.0(10) | C(3)–C(2)–H(2a)    | 127.0     |
| C(22)–C(20)–C(12)   | 114.1(9)  | C(2)–C(3)–N(3)     | 108.6     |
| C(23)–C(20)–C(12)   | 110.1(10) | C(2)–C(3)–H(3a)    | 125.7     |
| C(20)–C(21)–H(21a)  | 109.5     | N(3)–C(3)–H(3a)    | 125.7     |
| C(20)–C(21)–H(21b)  | 109.5     | N(4)–C(4)–C(5)     | 111.2     |
| H(21a)–C(21)–H(21b) | 109.5     | N(4)–C(4)–H(4a)    | 109.4     |
| C(20)–C(21)–H(21C)  | 109.5     | C(5)–C(4)–H(4a)    | 109.4     |
| H(21a)–C(21)–H(21C) | 109.5     | N(4)–C(4)–H(4b)    | 109.4     |
| H(21b)–C(21)–H(21C) | 109.5     | C(5)–C(4)–H(4b)    | 109.4     |
| C(20)–C(22)–H(22a)  | 109.5     | H(4a)–C(4)–H(4b)   | 108.0     |
| C(20)–C(22)–H(22b)  | 109.5     | C(4)–C(5)–H(5b)    | 109.5     |
| H(22a)–C(22)–H(22b) | 109.5     | C(4)–C(5)–H(5C)    | 109.5     |
| C(20)–C(22)–H(22C)  | 109.5     | H(5b)–C(5)–H(5C)   | 109.5     |
| H(22a)–C(22)–H(22C) | 109.5     | C(4)–C(5)–H(5d)    | 109.5     |
| H(22b)–C(22)–H(22C) | 109.5     | H(5b)–C(5)–H(5d)   | 109.5     |
| C(20)–C(23)–H(23a)  | 109.5     | H(5C)–C(5)–H(5d)   | 109.5     |

**Table S22.** Continued

| angle               | degree | angle | degree |
|---------------------|--------|-------|--------|
| C(20)–C(23)–H(23b)  | 109.5  |       |        |
| H(23a)–C(23)–H(23b) | 109.5  |       |        |

<sup>a</sup>The estimated standard deviations of the least significant digits are given in parentheses.

**Table S23.** Anisotropic Displacement Parameters ( $\text{\AA}^2$ ) for  $[\text{Co}(\text{TpivPP})(1\text{-EtIm})(\text{O}_2)]\cdot\text{C}_6\text{H}_6$  (300 K,  $C2/c$  form)<sup>a</sup>

| atom  | $U_{11}$   | $U_{22}$   | $U_{33}$   | $U_{23}$    | $U_{13}$    | $U_{12}$    |
|-------|------------|------------|------------|-------------|-------------|-------------|
| Co(1) | 0.0569(3)  | 0.0537(3)  | 0.0554(3)  | 0.000       | 0.0015(2)   | 0.000       |
| O(1)  | 0.111(3)   | 0.073(2)   | 0.098(3)   | 0.000       | 0.010(2)    | 0.000       |
| O(2A) | 0.113(10)  | 0.048(6)   | 0.121(12)  | 0.004(5)    | -0.034(7)   | 0.023(5)    |
| O(2B) | 0.18(3)    | 0.36(4)    | 0.25(3)    | 0.21(3)     | 0.08(2)     | 0.02(2)     |
| O(3)  | 0.099(2)   | 0.147(3)   | 0.255(5)   | -0.016(3)   | -0.029(3)   | -0.037(2)   |
| O(4)  | 0.334(6)   | 0.158(4)   | 0.103(2)   | 0.008(2)    | 0.071(3)    | -0.041(4)   |
| N(1)  | 0.0606(12) | 0.0563(12) | 0.0567(13) | 0.0002(10)  | 0.0033(10)  | -0.0020(10) |
| N(2)  | 0.0622(13) | 0.0579(13) | 0.0599(13) | -0.0038(10) | 0.0031(10)  | 0.0023(10)  |
| N(5)  | 0.0630(15) | 0.094(2)   | 0.128(3)   | -0.0170(18) | -0.0138(15) | -0.0083(15) |
| N(6)  | 0.149(3)   | 0.099(2)   | 0.0541(15) | -0.0012(16) | 0.0243(16)  | -0.013(2)   |
| C(A1) | 0.0701(17) | 0.0618(16) | 0.0582(16) | 0.0022(13)  | 0.0000(13)  | -0.0025(13) |
| C(A2) | 0.0660(16) | 0.0625(16) | 0.0619(17) | -0.0009(13) | -0.0004(13) | -0.0002(13) |
| C(A3) | 0.0571(15) | 0.0656(17) | 0.0637(17) | -0.0024(13) | 0.0025(12)  | 0.0011(12)  |
| C(A4) | 0.0640(16) | 0.0723(18) | 0.0608(17) | -0.0078(14) | 0.0063(13)  | 0.0029(13)  |
| C(B1) | 0.077(2)   | 0.097(2)   | 0.0542(17) | 0.0024(15)  | 0.0015(14)  | -0.0023(16) |
| C(B2) | 0.0708(19) | 0.097(2)   | 0.0598(18) | 0.0004(15)  | -0.0079(14) | -0.0032(16) |
| C(B3) | 0.0571(16) | 0.105(3)   | 0.073(2)   | -0.0022(17) | 0.0060(14)  | 0.0048(15)  |
| C(B4) | 0.0651(18) | 0.113(3)   | 0.0656(19) | -0.0074(17) | 0.0139(15)  | 0.0038(17)  |
| C(M1) | 0.0593(15) | 0.0649(17) | 0.0694(18) | 0.0001(13)  | -0.0016(13) | 0.0006(13)  |
| C(M2) | 0.0704(17) | 0.0695(17) | 0.0566(16) | -0.0068(13) | 0.0080(13)  | 0.0028(13)  |
| C(6)  | 0.0642(17) | 0.087(2)   | 0.0696(19) | 0.0074(16)  | -0.0020(14) | 0.0063(16)  |
| C(7)  | 0.0619(17) | 0.105(3)   | 0.079(2)   | -0.0013(19) | -0.0099(15) | 0.0048(18)  |
| C(8)  | 0.069(2)   | 0.147(4)   | 0.114(3)   | -0.001(3)   | -0.022(2)   | 0.001(2)    |
| C(9)  | 0.075(3)   | 0.193(6)   | 0.115(4)   | 0.027(3)    | -0.023(2)   | 0.016(3)    |
| C(10) | 0.093(3)   | 0.154(5)   | 0.127(4)   | 0.044(3)    | 0.003(3)    | 0.049(3)    |
| C(11) | 0.086(2)   | 0.101(3)   | 0.107(3)   | 0.020(2)    | 0.006(2)    | 0.020(2)    |
| C(12) | 0.083(3)   | 0.106(3)   | 0.114(3)   | -0.022(2)   | 0.002(2)    | -0.017(2)   |
| C(13) | 0.0652(17) | 0.103(3)   | 0.0637(18) | -0.0210(18) | 0.0021(14)  | 0.0068(16)  |
| C(14) | 0.079(2)   | 0.107(3)   | 0.0554(17) | -0.0112(18) | 0.0074(14)  | -0.0024(18) |
| C(15) | 0.092(2)   | 0.146(4)   | 0.063(2)   | -0.019(2)   | 0.0144(17)  | -0.007(2)   |
| C(16) | 0.086(3)   | 0.173(4)   | 0.071(2)   | -0.037(3)   | 0.0134(19)  | 0.013(3)    |
| C(17) | 0.101(3)   | 0.136(4)   | 0.089(3)   | -0.052(3)   | 0.007(2)    | 0.015(3)    |
| C(18) | 0.093(2)   | 0.101(3)   | 0.082(2)   | -0.026(2)   | 0.0047(18)  | 0.0084(19)  |
| C(19) | 0.127(3)   | 0.127(4)   | 0.066(2)   | 0.004(2)    | 0.010(2)    | -0.022(3)   |

**Table S23.** Continued

| atom   | $U_{11}$  | $U_{22}$  | $U_{33}$  | $U_{23}$   | $U_{13}$    | $U_{12}$   |
|--------|-----------|-----------|-----------|------------|-------------|------------|
| C(20)  | 0.117(13) | 0.060(11) | 0.11(2)   | -0.031(11) | 0.025(12)   | -0.002(9)  |
| C(21)  | 0.48(7)   | 0.19(3)   | 0.104(13) | -0.025(15) | 0.04(2)     | 0.16(4)    |
| C(22)  | 0.091(11) | 0.130(15) | 0.43(6)   | 0.04(2)    | 0.07(2)     | 0.039(10)  |
| C(23)  | 0.120(12) | 0.15(2)   | 0.18(2)   | 0.054(16)  | 0.036(12)   | -0.008(12) |
| C(20B) | 0.091(6)  | 0.121(11) | 0.108(11) | 0.011(8)   | 0.012(6)    | -0.012(6)  |
| C(21B) | 0.196(12) | 0.092(7)  | 0.48(4)   | -0.075(13) | -0.035(17)  | -0.032(7)  |
| C(22B) | 0.167(12) | 0.153(12) | 0.192(13) | 0.035(9)   | 0.094(11)   | 0.060(9)   |
| C(23B) | 0.228(18) | 0.207(15) | 0.117(8)  | 0.033(8)   | 0.043(8)    | 0.095(13)  |
| C(24)  | 0.079(6)  | 0.117(12) | 0.079(10) | -0.012(8)  | 0.013(6)    | -0.016(6)  |
| C(25)  | 0.127(9)  | 0.164(11) | 0.166(12) | -0.068(9)  | 0.031(8)    | -0.039(7)  |
| C(26)  | 0.113(8)  | 0.34(3)   | 0.169(14) | -0.114(16) | -0.018(9)   | 0.082(13)  |
| C(27)  | 0.27(2)   | 0.137(8)  | 0.067(5)  | -0.027(5)  | 0.004(8)    | -0.024(11) |
| C(24B) | 0.107(11) | 0.078(11) | 0.093(14) | 0.000(9)   | -0.017(8)   | -0.004(8)  |
| C(25B) | 0.099(10) | 0.37(3)   | 0.17(2)   | -0.12(2)   | -0.038(11)  | 0.012(14)  |
| C(26B) | 0.32(3)   | 0.108(10) | 0.23(2)   | 0.003(11)  | -0.17(2)    | 0.028(14)  |
| C(27B) | 0.205(19) | 0.130(10) | 0.22(2)   | -0.070(12) | 0.129(17)   | -0.041(12) |
| C(1S)  | 0.165(7)  | 0.254(9)  | 0.131(6)  | -0.023(5)  | 0.008(4)    | 0.012(5)   |
| C(2S)  | 0.124(6)  | 0.371(16) | 0.124(5)  | -0.003(8)  | 0.000(4)    | 0.045(7)   |
| C(3S)  | 0.142(9)  | 0.387(17) | 0.256(15) | 0.038(12)  | -0.006(7)   | -0.003(8)  |
| N(3)   | 0.081(2)  | 0.059(2)  | 0.082(2)  | 0.000      | -0.0226(19) | 0.000      |
| C(1)   | 0.107(6)  | 0.046(4)  | 0.104(8)  | 0.001(4)   | -0.035(5)   | 0.004(4)   |
| N(4)   | 0.059(5)  | 0.056(3)  | 0.123(8)  | 0.011(3)   | -0.006(5)   | 0.008(3)   |
| C(2)   | 0.070(5)  | 0.068(5)  | 0.094(5)  | 0.005(4)   | -0.014(4)   | -0.004(3)  |
| C(3)   | 0.129(7)  | 0.050(4)  | 0.096(7)  | -0.004(4)  | -0.022(5)   | -0.004(5)  |
| C(4)   | 0.113(6)  | 0.085(6)  | 0.159(9)  | 0.026(5)   | 0.037(6)    | -0.020(4)  |
| C(5)   | 0.259(14) | 0.092(6)  | 0.292(15) | 0.046(11)  | -0.014(12)  | -0.043(10) |

<sup>a</sup>The estimated standard deviations of the least significant digits are given in parentheses.

The anisotropic displacement factor exponent takes the form:  $-2 \pi [\text{h}^2 U_{11} + \dots + 2 \text{h k a}^* \text{ b}^* U_{12}]$ .

**Table S24.** Hydrogen Atom Coordinates and Equivalent Isotropic Displacement Parameters ( $\text{\AA}^2$ ) for  $[\text{Co}(\text{TpivPP})(1\text{-EtIm})(\text{O}_2)] \cdot \text{C}_6\text{H}_6$  (300 K,  $C2/c$  form)<sup>a</sup>

| atom   | $x$    | $y$    | $z$    | $U(\text{eq})$ |
|--------|--------|--------|--------|----------------|
| H(5A)  | 0.3041 | 0.7396 | 0.6378 | 0.114          |
| H(6A)  | 0.4011 | 0.7572 | 0.9525 | 0.121          |
| H(BA)  | 0.4503 | 0.8657 | 0.4831 | 0.091          |
| H(BB)  | 0.3319 | 0.8552 | 0.5350 | 0.091          |
| H(BC)  | 0.2330 | 0.8531 | 0.7963 | 0.094          |
| H(BD)  | 0.2867 | 0.8629 | 0.9150 | 0.097          |
| H(8A)  | 0.1271 | 0.7595 | 0.5893 | 0.132          |
| H(9A)  | 0.0661 | 0.8620 | 0.5892 | 0.153          |
| H(10A) | 0.1196 | 0.9587 | 0.6305 | 0.150          |
| H(11A) | 0.2371 | 0.9562 | 0.6690 | 0.117          |
| H(15A) | 0.3435 | 0.7862 | 1.1257 | 0.120          |
| H(16A) | 0.3372 | 0.8946 | 1.1766 | 0.132          |
| H(17A) | 0.3775 | 0.9884 | 1.1167 | 0.130          |
| H(18A) | 0.4180 | 0.9776 | 1.0017 | 0.110          |
| H(21A) | 0.3348 | 0.5426 | 0.5707 | 0.386          |
| H(21B) | 0.3014 | 0.6060 | 0.5315 | 0.386          |
| H(21C) | 0.2516 | 0.5510 | 0.5657 | 0.386          |
| H(22A) | 0.3714 | 0.6688 | 0.6967 | 0.328          |
| H(22B) | 0.3821 | 0.6741 | 0.6140 | 0.328          |
| H(22C) | 0.4052 | 0.6076 | 0.6550 | 0.328          |
| H(23A) | 0.3168 | 0.5334 | 0.7064 | 0.226          |
| H(23B) | 0.2351 | 0.5437 | 0.6898 | 0.226          |
| H(23C) | 0.2747 | 0.5925 | 0.7437 | 0.226          |
| H(21D) | 0.2109 | 0.5393 | 0.6486 | 0.386          |
| H(21E) | 0.2858 | 0.5099 | 0.6282 | 0.386          |
| H(21F) | 0.2384 | 0.5466 | 0.5702 | 0.386          |
| H(22D) | 0.3734 | 0.6674 | 0.6062 | 0.255          |
| H(22E) | 0.3376 | 0.6249 | 0.5443 | 0.255          |
| H(22F) | 0.3851 | 0.5882 | 0.6023 | 0.255          |
| H(23D) | 0.2670 | 0.6060 | 0.7456 | 0.276          |
| H(23E) | 0.3302 | 0.6559 | 0.7291 | 0.276          |
| H(23F) | 0.3420 | 0.5767 | 0.7253 | 0.276          |
| H(25A) | 0.3276 | 0.5722 | 1.0307 | 0.228          |
| H(25B) | 0.3265 | 0.5468 | 0.9513 | 0.228          |



**Table S24.** Continued

| atom   | <i>x</i> | <i>y</i> | <i>z</i> | <i>U</i> (eq) |
|--------|----------|----------|----------|---------------|
| H(25C) | 0.2789   | 0.6089   | 0.9737   | 0.228         |
| H(26A) | 0.4929   | 0.6296   | 0.9666   | 0.311         |
| H(26B) | 0.4572   | 0.5595   | 0.9469   | 0.311         |
| H(26C) | 0.4583   | 0.5848   | 1.0264   | 0.311         |
| H(27A) | 0.4164   | 0.6873   | 0.8772   | 0.238         |
| H(27B) | 0.3332   | 0.6793   | 0.8800   | 0.238         |
| H(27C) | 0.3808   | 0.6172   | 0.8575   | 0.238         |
| H(25D) | 0.3268   | 0.5796   | 0.8980   | 0.317         |
| H(25E) | 0.3016   | 0.6552   | 0.9091   | 0.317         |
| H(25F) | 0.2919   | 0.6013   | 0.9701   | 0.317         |
| H(26D) | 0.4342   | 0.5368   | 0.9658   | 0.328         |
| H(26E) | 0.3942   | 0.5571   | 1.0357   | 0.328         |
| H(26F) | 0.4713   | 0.5851   | 1.0219   | 0.328         |
| H(27D) | 0.4494   | 0.6176   | 0.8703   | 0.276         |
| H(27E) | 0.4886   | 0.6690   | 0.9218   | 0.276         |
| H(27F) | 0.4218   | 0.6930   | 0.8769   | 0.276         |
| H(1SA) | 0.9529   | 0.8402   | 0.7082   | 0.275         |
| H(2SA) | 0.9130   | 0.9453   | 0.6635   | 0.248         |
| H(3SA) | 0.9585   | 1.0491   | 0.7101   | 0.392         |
| H(1A)  | 0.5651   | 1.0051   | 0.6790   | 0.103         |
| H(2A)  | 0.4327   | 1.1064   | 0.8029   | 0.093         |
| H(3A)  | 0.4193   | 0.9837   | 0.8254   | 0.110         |
| H(4A)  | 0.5093   | 1.1420   | 0.6479   | 0.143         |
| H(4B)  | 0.5835   | 1.1376   | 0.6879   | 0.143         |
| H(5B)  | 0.4683   | 1.1977   | 0.7594   | 0.322         |
| H(5C)  | 0.5117   | 1.2424   | 0.7057   | 0.322         |
| H(5D)  | 0.5498   | 1.2113   | 0.7734   | 0.322         |

<sup>a</sup> *U*(eq) is defined as one third of the trace of the orthogonalized  $\mathbf{U}_{ij}$  tensor.

The estimated standard deviations of the least significant digits are given in parentheses.

## Supporting Information

**Table S25.** Complete Crystallographic Details for [Co(TpivPP)(2-MeHIm)(O<sub>2</sub>)]·1.8C<sub>2</sub>H<sub>5</sub>OH (100 K, C2/c form)

|                                                              |                                                                        |
|--------------------------------------------------------------|------------------------------------------------------------------------|
| formula                                                      | C <sub>71.6</sub> H <sub>80.8</sub> CoN <sub>10</sub> O <sub>7.8</sub> |
| FW, amu                                                      | 1265.19                                                                |
| <i>a</i> , Å                                                 | 18.7514(3)                                                             |
| <i>b</i> , Å                                                 | 19.5309(3)                                                             |
| <i>c</i> , Å                                                 | 17.8719(3)                                                             |
| $\beta$ , deg                                                | 91.0650(10)                                                            |
| <i>V</i> , Å <sup>3</sup>                                    | 6544.13(18)                                                            |
| space group                                                  | C2/c                                                                   |
| <i>Z</i>                                                     | 4                                                                      |
| D <sub>c</sub> , g/cm <sup>3</sup>                           | 1.284                                                                  |
| F(000)                                                       | 2679                                                                   |
| $\mu$ , mm <sup>-1</sup>                                     | 0.326                                                                  |
| crystal dimensions, mm                                       | 0.37 × 0.21 × 0.16                                                     |
| radiation                                                    | MoK $\alpha$ , $\bar{\lambda}$ = 0.71073 Å                             |
| temperature, K                                               | 100(2)                                                                 |
| diffractometer                                               | Bruker Apex CCD                                                        |
| $\theta$ range for collected data, deg                       | 1.51–31.00                                                             |
| index range                                                  | –27 ≤ <i>h</i> ≤ 27<br>–28 ≤ <i>k</i> ≤ 28<br>–25 ≤ <i>l</i> ≤ 25      |
| total data collected                                         | 68291                                                                  |
| absorption correction                                        | Semi-empirical from equiv                                              |
| relative transmission coefficients (I)                       | 0.9497 and 0.8889                                                      |
| unique data                                                  | 10425 ( <i>R</i> <sub>int</sub> = 0.028)                               |
| unique observed data [ <i>I</i> > 2 $\sigma$ ( <i>I</i> )]   | 8732                                                                   |
| refinement method                                            | Full-matrix least-squares on F <sup>2</sup>                            |
| data/restraints/parameters                                   | 10425/1/521                                                            |
| goodness-of-fit (based on <i>F</i> <sup>2</sup> )            | 1.057                                                                  |
| final <i>R</i> indices [ <i>I</i> > 2 $\sigma$ ( <i>I</i> )] | <i>R</i> <sub>1</sub> = 0.0559, <i>wR</i> <sub>2</sub> = 0.1591        |
| final <i>R</i> indices (all data)                            | <i>R</i> <sub>1</sub> = 0.0676, <i>wR</i> <sub>2</sub> = 0.1703        |

**Table S26.** Atomic Coordinates and Equivalent Isotropic Displacement Parameters ( $\text{\AA}^2$ ) for  $[\text{Co}(\text{TpivPP})(2\text{-MeHIm})(\text{O}_2)] \cdot 1.8\text{C}_2\text{H}_5\text{OH}^a$  (100 K,  $C2/c$  form)<sup>a</sup>

| atom  | $x$         | $y$         | $z$         | $U(\text{eq})$ |
|-------|-------------|-------------|-------------|----------------|
| Co(1) | 0.5000      | 0.86363(1)  | 0.7500      | 0.0187(1)      |
| O(1)  | 0.5000      | 0.76626(11) | 0.7500      | 0.0463(5)      |
| O(2)  | 0.5411(2)   | 0.73064(18) | 0.7729(2)   | 0.0537(9)      |
| N(3)  | 0.40332(7)  | 0.85847(7)  | 0.79322(7)  | 0.0222(2)      |
| N(4)  | 0.54217(7)  | 0.86318(7)  | 0.85261(7)  | 0.0209(2)      |
| N(5)  | 0.39145(10) | 0.74530(9)  | 1.00339(10) | 0.0379(4)      |
| N(6)  | 0.72976(9)  | 0.73159(10) | 0.87680(12) | 0.0442(5)      |
| C(a1) | 0.33927(9)  | 0.85376(9)  | 0.75470(9)  | 0.0251(3)      |
| C(a2) | 0.38569(9)  | 0.85713(8)  | 0.86773(9)  | 0.0240(3)      |
| C(a3) | 0.50677(9)  | 0.86631(8)  | 0.91938(8)  | 0.0224(3)      |
| C(a4) | 0.61342(9)  | 0.86174(8)  | 0.87187(9)  | 0.0232(3)      |
| C(b1) | 0.28072(9)  | 0.84808(10) | 0.80586(10) | 0.0307(3)      |
| C(b2) | 0.30967(10) | 0.85076(10) | 0.87573(10) | 0.0301(3)      |
| C(b3) | 0.55697(10) | 0.86808(9)  | 0.98167(9)  | 0.0281(3)      |
| C(b4) | 0.62289(10) | 0.86533(9)  | 0.95221(9)  | 0.0284(3)      |
| C(m1) | 0.43331(9)  | 0.86376(8)  | 0.92801(9)  | 0.0229(3)      |
| C(m2) | 0.66980(9)  | 0.85617(8)  | 0.82271(9)  | 0.0247(3)      |
| C(5)  | 0.40459(9)  | 0.86729(9)  | 1.00560(9)  | 0.0254(3)      |
| C(6)  | 0.38491(10) | 0.80743(10) | 1.04329(9)  | 0.0302(3)      |
| C(7)  | 0.36010(11) | 0.81110(14) | 1.11670(10) | 0.0424(5)      |
| C(8)  | 0.35529(11) | 0.87460(15) | 1.15146(11) | 0.0481(6)      |
| C(9)  | 0.37426(11) | 0.93364(14) | 1.11522(12) | 0.0439(5)      |
| C(10) | 0.39878(10) | 0.93010(11) | 1.04197(11) | 0.0342(4)      |
| C(11) | 0.74394(9)  | 0.85264(10) | 0.85481(10) | 0.0287(3)      |
| C(12) | 0.77236(9)  | 0.79116(11) | 0.88152(11) | 0.0343(4)      |
| C(13) | 0.84146(11) | 0.78952(14) | 0.91287(13) | 0.0455(5)      |
| C(14) | 0.88259(12) | 0.84812(15) | 0.91381(15) | 0.0497(6)      |
| C(15) | 0.85590(12) | 0.90859(14) | 0.88579(16) | 0.0515(6)      |
| C(16) | 0.78640(11) | 0.91114(11) | 0.85758(13) | 0.0400(4)      |
| C(17) | 0.38421(12) | 0.67976(12) | 1.02561(15) | 0.0468(5)      |
| C(18) | 0.39158(8)  | 0.62678(8)  | 0.9533(2)   | 0.0311(9)      |
| C(19) | 0.31901(9)  | 0.59453(14) | 0.9434(3)   | 0.0367(10)     |
| C(20) | 0.44483(12) | 0.57288(13) | 0.9771(3)   | 0.0554(15)     |
| C(21) | 0.41401(19) | 0.65798(17) | 0.8803(2)   | 0.0449(12)     |

**Table S26.** Continued

| atom   | <i>x</i>    | <i>y</i>    | <i>z</i>    | <i>U</i> (eq) |
|--------|-------------|-------------|-------------|---------------|
| C(18b) | 0.39085(10) | 0.62423(9)  | 0.9800(2)   | 0.0316(13)    |
| C(19b) | 0.31610(8)  | 0.60046(15) | 0.9616(3)   | 0.042(2)      |
| C(20b) | 0.43223(17) | 0.56664(15) | 1.0163(3)   | 0.070(3)      |
| C(21b) | 0.42699(14) | 0.64562(14) | 0.9091(2)   | 0.070(3)      |
| C(22)  | 0.75276(11) | 0.66667(12) | 0.86379(11) | 0.0380(4)     |
| C(23)  | 0.69704(11) | 0.61127(10) | 0.85777(13) | 0.0401(8)     |
| C(25)  | 0.62095(14) | 0.63477(18) | 0.8653(2)   | 0.0634(12)    |
| C(24)  | 0.71474(19) | 0.56016(18) | 0.91848(16) | 0.0684(11)    |
| C(26)  | 0.70609(17) | 0.57822(17) | 0.78235(14) | 0.0585(10)    |
| C(23b) | 0.6986(5)   | 0.6052(4)   | 0.8378(6)   | 0.048(5)      |
| C(25b) | 0.6359(9)   | 0.6148(10)  | 0.8884(5)   | 0.071(6)      |
| C(24b) | 0.7297(8)   | 0.5349(6)   | 0.8496(10)  | 0.076(6)      |
| C(26b) | 0.6742(6)   | 0.6128(6)   | 0.7574(5)   | 0.041(3)      |
| O(4a)  | 0.8149(6)   | 0.6602(5)   | 0.8511(12)  | 0.047(3)      |
| O(3a)  | 0.3639(8)   | 0.6683(8)   | 1.0939(6)   | 0.0634(18)    |
| O(4b)  | 0.8156(9)   | 0.6409(16)  | 0.8764(10)  | 0.048(4)      |
| O(3b)  | 0.387(2)    | 0.6567(8)   | 1.0831(10)  | 0.058(5)      |
| N(1)   | 0.4914(3)   | 0.96944(13) | 0.7582(3)   | 0.0194(8)     |
| C(1)   | 0.52580(17) | 1.02084(16) | 0.72458(18) | 0.0228(6)     |
| N(2)   | 0.4993(8)   | 1.08137(13) | 0.7496(9)   | 0.0261(6)     |
| C(2)   | 0.45019(17) | 1.06984(18) | 0.80131(18) | 0.0256(6)     |
| C(3)   | 0.44385(19) | 1.00129(18) | 0.80628(19) | 0.0235(6)     |
| C(4)   | 0.5824(2)   | 1.01717(18) | 0.6676(2)   | 0.0319(7)     |
| O(1S)  | 0.44760(18) | 0.20174(16) | 0.8100(2)   | 0.0504(9)     |
| C(1S)  | 0.4728(3)   | 0.2604(2)   | 0.7812(3)   | 0.1109(18)    |
| C(2S)  | 0.4639(7)   | 0.5566(5)   | 0.2252(5)   | 0.089(3)      |
| C(3S)  | 0.5000      | 0.5094(7)   | 0.2500      | 0.137(4)      |
| O(2S)  | 0.4494(7)   | 0.5446(4)   | 0.1601(6)   | 0.151(4)      |

<sup>a</sup>*U*(eq) is defined as one third of the trace of the orthogonalized  $\mathbf{U}_{ij}$  tensor.

The estimated standard deviations of the least significant digits are given in parentheses.

**Table S27.** Bond Lengths for [Co(TpivPP)(2-MeHIm)(O<sub>2</sub>)]·1.8C<sub>2</sub>H<sub>5</sub>OH<sup>a</sup> (100 K, C2/c form)<sup>a</sup>

| bond          | length (Å) | bond          | length (Å) |
|---------------|------------|---------------|------------|
| Co(1)–O(1)    | 1.902(2)   | C(19)–H(19C)  | 0.9800     |
| Co(1)–N(4)    | 1.9836(13) | C(20)–H(20a)  | 0.9800     |
| Co(1)–N(4)#1  | 1.9836(13) | C(20)–H(20b)  | 0.9800     |
| Co(1)–N(3)    | 1.9863(14) | C(20)–H(20C)  | 0.9800     |
| Co(1)–N(3)#1  | 1.9863(14) | C(21)–H(21a)  | 0.9800     |
| Co(1)–N(1)    | 2.078(2)   | C(21)–H(21b)  | 0.9800     |
| Co(1)–N(1)#1  | 2.078(2)   | C(21)–H(21C)  | 0.9800     |
| O(1)–O(2)     | 1.110(4)   | C(18b)–C(21b) | 1.5069     |
| O(1)–O(2)#1   | 1.111(4)   | C(18b)–C(20b) | 1.5069     |
| O(2)–O(2)#1   | 1.731(7)   | C(18b)–C(19b) | 1.5069     |
| N(3)–C(a1)    | 1.376(2)   | C(19b)–H(19d) | 0.9800     |
| N(3)–C(a2)    | 1.378(2)   | C(19b)–H(19e) | 0.9800     |
| N(4)–C(a4)    | 1.374(2)   | C(19b)–H(19F) | 0.9800     |
| N(4)–C(a3)    | 1.3775(19) | C(20b)–H(20d) | 0.9800     |
| N(5)–C(17)    | 1.348(3)   | C(20b)–H(20e) | 0.9800     |
| N(5)–C(6)     | 1.414(3)   | C(20b)–H(20F) | 0.9800     |
| N(5)–H(5a)    | 0.8800     | C(21b)–H(21d) | 0.9800     |
| N(6)–C(22)    | 1.361(3)   | C(21b)–H(21e) | 0.9800     |
| N(6)–C(12)    | 1.413(3)   | C(21b)–H(21F) | 0.9800     |
| N(6)–H(6a)    | 0.8800     | C(22)–O(4a)   | 1.197(8)   |
| C(a1)–C(m2#1) | 1.392(2)   | C(22)–O(4b)   | 1.298(7)   |
| C(a1)–C(b1)   | 1.446(2)   | C(22)–C(23)   | 1.507(3)   |
| C(a2)–C(m1)   | 1.392(2)   | C(22)–C(23b)  | 1.634(8)   |
| C(a2)–C(b2)   | 1.441(2)   | C(23)–C(24)   | 1.5068     |
| C(a3)–C(m1)   | 1.390(2)   | C(23)–C(26)   | 1.5070     |
| C(a3)–C(b3)   | 1.445(2)   | C(23)–C(25)   | 1.5073     |
| C(a4)–C(m2)   | 1.391(2)   | C(25)–H(25a)  | 0.9800     |
| C(a4)–C(b4)   | 1.445(2)   | C(25)–H(25b)  | 0.9800     |
| C(b1)–C(b2)   | 1.353(2)   | C(25)–H(25C)  | 0.9800     |
| C(b1)–H(ba)   | 0.9500     | C(24)–H(24a)  | 0.9800     |
| C(b2)–H(bb)   | 0.9500     | C(24)–H(24b)  | 0.9800     |
| C(b3)–C(b4)   | 1.353(3)   | C(24)–H(24C)  | 0.9800     |
| C(b3)–H(bc)   | 0.9500     | C(26)–H(26a)  | 0.9800     |
| C(b4)–H(bd)   | 0.9500     | C(26)–H(26b)  | 0.9800     |

**Table S27.** Continued

| bond          | length (Å) | bond           | length (Å) |
|---------------|------------|----------------|------------|
| C(m1)–C(5)    | 1.498(2)   | C(26)–H(26C)   | 0.9800     |
| C(m2)–C(a1#1) | 1.392(2)   | C(23b)–C(25b)  | 1.5070     |
| C(m2)–C(11)   | 1.496(2)   | C(23b)–C(24b)  | 1.5070     |
| C(5)–C(10)    | 1.394(2)   | C(23b)–C(26b)  | 1.5071     |
| C(5)–C(6)     | 1.402(2)   | C(25b)–H(25d)  | 0.9800     |
| C(6)–C(7)     | 1.402(2)   | C(25b)–H(25e)  | 0.9800     |
| C(7)–C(8)     | 1.391(4)   | C(25b)–H(25F)  | 0.9800     |
| C(7)–H(7a)    | 0.9500     | C(24b)–H(24d)  | 0.9800     |
| C(8)–C(9)     | 1.373(4)   | C(24b)–H(24e)  | 0.9800     |
| C(8)–H(8a)    | 0.9500     | C(24b)–H(24F)  | 0.9800     |
| C(9)–C(10)    | 1.397(3)   | C(26b)–H(26d)  | 0.9800     |
| C(9)–H(9a)    | 0.9500     | C(26b)–H(26e)  | 0.9800     |
| C(10)–H(10a)  | 0.9500     | C(26b)–H(26F)  | 0.9800     |
| C(11)–C(16)   | 1.393(3)   | N(1)–C(1)      | 1.341(4)   |
| C(11)–C(12)   | 1.394(3)   | N(1)–C(3)      | 1.396(4)   |
| C(12)–C(13)   | 1.402(3)   | C(1)–N(2)      | 1.361(7)   |
| C(13)–C(14)   | 1.380(4)   | C(1)–C(4)      | 1.486(5)   |
| C(13)–H(13a)  | 0.9500     | N(2)–C(2)      | 1.336(14)  |
| C(14)–C(15)   | 1.374(4)   | N(2)–H(2a)     | 0.8800     |
| C(14)–H(14a)  | 0.9500     | C(2)–C(3)      | 1.347(5)   |
| C(15)–C(16)   | 1.389(3)   | C(2)–H(2b)     | 0.9500     |
| C(15)–H(15a)  | 0.9500     | C(3)–H(3a)     | 0.9500     |
| C(16)–H(16a)  | 0.9500     | C(4)–H(4a)     | 0.9800     |
| C(17)–O(3b)   | 1.122(13)  | C(4)–H(4b)     | 0.9800     |
| C(17)–O(3a)   | 1.304(12)  | C(4)–H(4C)     | 0.9800     |
| C(17)–C(18b)  | 1.364(4)   | O(1S)–C(1S)    | 1.345(5)   |
| C(17)–C(18)   | 1.663(4)   | C(1S)–C(1S)#1) | 1.525(7)   |
| C(18)–C(21)   | 1.5069     | C(2S)–O(2S)    | 1.213(12)  |
| C(18)–C(19)   | 1.5069     | C(2S)–C(3S)    | 1.222(13)  |
| C(18)–C(20)   | 1.5070     | C(2S)–C(2S)#2) | 1.60(2)    |
| C(19)–H(19a)  | 0.9800     | C(3S)–C(2S)#2) | 1.222(13)  |
| C(19)–H(19b)  | 0.9800     |                |            |

<sup>a</sup>The estimated standard deviations of the least significant digits are given in parentheses.

**Table S28.** Bond Angles for [Co(TpivPP)(2-MeHIm)(O<sub>2</sub>)]·1.8C<sub>2</sub>H<sub>5</sub>OH<sup>a</sup> (100 K, C2/c form)<sup>a</sup>

| angle               | degree     | angle                | degree     |
|---------------------|------------|----------------------|------------|
| O(1)–Co(1)–N(4)     | 89.75(4)   | H(19a)–C(19)–H(19C)  | 109.5      |
| O(1)–Co(1)–N(4)#1   | 89.75(4)   | H(19b)–C(19)–H(19C)  | 109.5      |
| N(4)–Co(1)–N(4)#1   | 179.50(8)  | C(18)–C(20)–H(20a)   | 109.5      |
| O(1)–Co(1)–N(3)     | 87.09(4)   | C(18)–C(20)–H(20b)   | 109.5      |
| N(4)–Co(1)–N(3)     | 89.50(6)   | H(20a)–C(20)–H(20b)  | 109.5      |
| N(4)#1–Co(1)–N(3)   | 90.47(6)   | C(18)–C(20)–H(20C)   | 109.5      |
| O(1)–Co(1)–N(3)#1   | 87.10(4)   | H(20a)–C(20)–H(20C)  | 109.5      |
| N(4)–Co(1)–N(3)#1   | 90.48(6)   | H(20b)–C(20)–H(20C)  | 109.5      |
| N(4)#1–Co(1)–N(3)#1 | 89.50(6)   | C(18)–C(21)–H(21a)   | 109.5      |
| N(3)–Co(1)–N(3)#1   | 174.19(8)  | C(18)–C(21)–H(21b)   | 109.5      |
| O(1)–Co(1)–N(1)     | 173.93(8)  | H(21a)–C(21)–H(21b)  | 109.5      |
| N(4)–Co(1)–N(1)     | 88.2(2)    | C(18)–C(21)–H(21C)   | 109.5      |
| N(4)#1–Co(1)–N(1)   | 92.2(2)    | H(21a)–C(21)–H(21C)  | 109.5      |
| N(3)–Co(1)–N(1)     | 87.16(11)  | H(21b)–C(21)–H(21C)  | 109.5      |
| N(3)#1–Co(1)–N(1)   | 98.65(11)  | C(17)–C(18b)–C(21b)  | 109.25(19) |
| O(1)–Co(1)–N(1)#1   | 173.93(8)  | C(17)–C(18b)–C(20b)  | 112.8(2)   |
| N(4)–Co(1)–N(1)#1   | 92.2(2)    | C(21b)–C(18b)–C(20b) | 109.5      |
| N(4)#1–Co(1)–N(1)#1 | 88.3(2)    | C(17)–C(18b)–C(19b)  | 106.3(2)   |
| N(3)–Co(1)–N(1)#1   | 98.65(11)  | C(21b)–C(18b)–C(19b) | 109.5      |
| N(3)#1–Co(1)–N(1)#1 | 87.16(11)  | C(20b)–C(18b)–C(19b) | 109.5      |
| N(1)–Co(1)–N(1)#1   | 12.14(16)  | C(18b)–C(19b)–H(19d) | 109.5      |
| O(2)–O(1)–O(2)#1    | 102.4(4)   | C(18b)–C(19b)–H(19e) | 109.5      |
| O(2)–O(1)–Co(1)     | 128.8(2)   | H(19d)–C(19b)–H(19e) | 109.5      |
| O(2)#1–O(1)–Co(1)   | 128.8(2)   | C(18b)–C(19b)–H(19F) | 109.5      |
| O(1)–O(2)–O(2)#1    | 38.8(2)    | H(19d)–C(19b)–H(19f) | 109.5      |
| C(a1)–N(3)–C(a2)    | 105.02(13) | H(19e)–C(19b)–H(19f) | 109.5      |
| C(a1)–N(3)–Co(1)    | 127.10(11) | C(18b)–C(20b)–H(20d) | 109.5      |
| C(a2)–N(3)–Co(1)    | 127.86(11) | C(18b)–C(20b)–H(20e) | 109.5      |
| C(a4)–N(4)–C(a3)    | 105.42(13) | H(20d)–C(20b)–H(20e) | 109.5      |
| C(a4)–N(4)–Co(1)    | 126.93(11) | C(18b)–C(20b)–H(20F) | 109.5      |
| C(a3)–N(4)–Co(1)    | 127.63(11) | H(20d)–C(20b)–H(20f) | 109.5      |
| C(17)–N(5)–C(6)     | 131.02(19) | H(20e)–C(20b)–H(20f) | 109.5      |
| C(17)–N(5)–H(5a)    | 114.5      | C(18b)–C(21b)–H(21d) | 109.5      |
| C(6)–N(5)–H(5a)     | 114.5      | C(18b)–C(21b)–H(21e) | 109.5      |

**Table S28.** Continued

| angle               | degree     | angle                | degree     |
|---------------------|------------|----------------------|------------|
| C(22)–N(6)–C(12)    | 126.64(17) | H(21d)–C(21b)–H(21e) | 109.5      |
| C(22)–N(6)–H(6a)    | 116.7      | C(18b)–C(21b)–H(21F) | 109.5      |
| C(12)–N(6)–H(6a)    | 116.7      | H(21d)–C(21b)–H(21f) | 109.5      |
| N(3)–C(a1)–C(m2#1)  | 125.76(15) | H(21e)–C(21b)–H(21f) | 109.5      |
| N(3)–C(a1)–C(b1)    | 110.78(14) | O(4a)–C(22)–O(4b)    | 26.8(5)    |
| C(m2#1)–C(a1)–C(b1) | 123.43(16) | O(4a)–C(22)–N(6)     | 116.3(4)   |
| N(3)–C(a2)–C(m1)    | 125.72(15) | O(4b)–C(22)–N(6)     | 128.4(12)  |
| N(3)–C(a2)–C(b2)    | 110.68(14) | O(4a)–C(22)–C(23)    | 125.9(3)   |
| C(m1)–C(a2)–C(b2)   | 123.56(15) | O(4b)–C(22)–C(23)    | 111.1(15)  |
| N(4)–C(a3)–C(m1)    | 126.08(14) | N(6)–C(22)–C(23)     | 117.38(18) |
| N(4)–C(a3)–C(b3)    | 110.55(14) | O(4a)–C(22)–C(23b)   | 118.1(5)   |
| C(m1)–C(a3)–C(b3)   | 123.25(15) | O(4b)–C(22)–C(23b)   | 108.8(14)  |
| N(4)–C(a4)–C(m2)    | 126.18(15) | N(6)–C(22)–C(23b)    | 122.4(4)   |
| N(4)–C(a4)–C(b4)    | 110.41(14) | C(23)–C(22)–C(23b)   | 13.0(4)    |
| C(m2)–C(a4)–C(b4)   | 123.40(15) | C(22)–C(23)–C(24)    | 106.33(18) |
| C(b2)–C(b1)–C(a1)   | 106.51(15) | C(22)–C(23)–C(26)    | 106.38(18) |
| C(b2)–C(b1)–H(ba)   | 126.7      | C(24)–C(23)–C(26)    | 109.5      |
| C(a1)–C(b1)–H(ba)   | 126.7      | C(22)–C(23)–C(25)    | 115.55(19) |
| C(b1)–C(b2)–C(a2)   | 107.00(15) | C(24)–C(23)–C(25)    | 109.5      |
| C(b1)–C(b2)–H(bb)   | 126.5      | C(26)–C(23)–C(25)    | 109.5      |
| C(a2)–C(b2)–H(bb)   | 126.5      | C(23)–C(25)–H(25a)   | 109.5      |
| C(b4)–C(b3)–C(a3)   | 106.61(14) | C(23)–C(25)–H(25b)   | 109.5      |
| C(b4)–C(b3)–H(bC)   | 126.7      | H(25a)–C(25)–H(25b)  | 109.5      |
| C(a3)–C(b3)–H(bC)   | 126.7      | C(23)–C(25)–H(25C)   | 109.5      |
| C(b3)–C(b4)–C(a4)   | 106.99(15) | H(25a)–C(25)–H(25C)  | 109.5      |
| C(b3)–C(b4)–H(bd)   | 126.5      | H(25b)–C(25)–H(25C)  | 109.5      |
| C(a4)–C(b4)–H(bd)   | 126.5      | C(23)–C(24)–H(24a)   | 109.5      |
| C(a3)–C(m1)–C(a2)   | 122.70(15) | C(23)–C(24)–H(24b)   | 109.5      |
| C(a3)–C(m1)–C(5)    | 118.36(14) | H(24a)–C(24)–H(24b)  | 109.5      |
| C(a2)–C(m1)–C(5)    | 118.94(15) | C(23)–C(24)–H(24C)   | 109.5      |
| C(a4)–C(m2)–C(a1#1) | 123.38(15) | H(24a)–C(24)–H(24C)  | 109.5      |
| C(a4)–C(m2)–C(11)   | 118.25(15) | H(24b)–C(24)–H(24C)  | 109.5      |
| C(a1#1)–C(m2)–C(11) | 118.38(15) | C(23)–C(26)–H(26a)   | 109.5      |
| C(10)–C(5)–C(6)     | 119.10(16) | C(23)–C(26)–H(26b)   | 109.5      |



**Table S28.** Continued

| angle              | degree     | angle                | degree    |
|--------------------|------------|----------------------|-----------|
| C(10)–C(5)–C(m1)   | 120.31(16) | H(26a)–C(26)–H(26b)  | 109.5     |
| C(6)–C(5)–C(m1)    | 120.57(15) | C(23)–C(26)–H(26C)   | 109.5     |
| C(7)–C(6)–C(5)     | 120.12(19) | H(26a)–C(26)–H(26C)  | 109.5     |
| C(7)–C(6)–N(5)     | 123.31(19) | H(26b)–C(26)–H(26C)  | 109.5     |
| C(5)–C(6)–N(5)     | 116.56(15) | C(25b)–C(23b)–C(24b) | 109.5     |
| C(8)–C(7)–C(6)     | 119.3(2)   | C(25b)–C(23b)–C(26b) | 109.5     |
| C(8)–C(7)–H(7a)    | 120.4      | C(24b)–C(23b)–C(26b) | 109.5     |
| C(6)–C(7)–H(7a)    | 120.4      | C(25b)–C(23b)–C(22)  | 103.1(10) |
| C(9)–C(8)–C(7)     | 121.24(18) | C(24b)–C(23b)–C(22)  | 113.1(8)  |
| C(9)–C(8)–H(8a)    | 119.4      | C(26b)–C(23b)–C(22)  | 112.0(7)  |
| C(7)–C(8)–H(8a)    | 119.4      | C(23b)–C(25b)–H(25d) | 109.5     |
| C(8)–C(9)–C(10)    | 119.6(2)   | C(23b)–C(25b)–H(25e) | 109.5     |
| C(8)–C(9)–H(9a)    | 120.2      | H(25d)–C(25b)–H(25e) | 109.5     |
| C(10)–C(9)–H(9a)   | 120.2      | C(23b)–C(25b)–H(25F) | 109.5     |
| C(5)–C(10)–C(9)    | 120.7(2)   | H(25d)–C(25b)–H(25f) | 109.5     |
| C(5)–C(10)–H(10a)  | 119.7      | H(25e)–C(25b)–H(25f) | 109.5     |
| C(9)–C(10)–H(10a)  | 119.7      | C(23b)–C(24b)–H(24d) | 109.5     |
| C(16)–C(11)–C(12)  | 118.66(17) | C(23b)–C(24b)–H(24e) | 109.5     |
| C(16)–C(11)–C(m2)  | 120.16(17) | H(24d)–C(24b)–H(24e) | 109.5     |
| C(12)–C(11)–C(m2)  | 121.17(16) | C(23b)–C(24b)–H(24F) | 109.5     |
| C(11)–C(12)–C(13)  | 120.1(2)   | H(24d)–C(24b)–H(24f) | 109.5     |
| C(11)–C(12)–N(6)   | 118.47(16) | H(24e)–C(24b)–H(24f) | 109.5     |
| C(13)–C(12)–N(6)   | 121.48(19) | C(23b)–C(26b)–H(26d) | 109.5     |
| C(14)–C(13)–C(12)  | 119.9(2)   | C(23b)–C(26b)–H(26e) | 109.5     |
| C(14)–C(13)–H(13a) | 120.1      | H(26d)–C(26b)–H(26e) | 109.5     |
| C(12)–C(13)–H(13a) | 120.1      | C(23b)–C(26b)–H(26F) | 109.5     |
| C(15)–C(14)–C(13)  | 120.6(2)   | H(26d)–C(26b)–H(26f) | 109.5     |
| C(15)–C(14)–H(14a) | 119.7      | H(26e)–C(26b)–H(26f) | 109.5     |
| C(13)–C(14)–H(14a) | 119.7      | C(1)–N(1)–C(3)       | 105.1(3)  |
| C(14)–C(15)–C(16)  | 119.7(2)   | C(1)–N(1)–Co(1)      | 132.4(2)  |
| C(14)–C(15)–H(15a) | 120.1      | C(3)–N(1)–Co(1)      | 122.5(2)  |
| C(16)–C(15)–H(15a) | 120.1      | N(1)–C(1)–N(2)       | 108.8(6)  |
| C(15)–C(16)–C(11)  | 121.0(2)   | N(1)–C(1)–C(4)       | 128.8(3)  |
| C(15)–C(16)–H(16a) | 119.5      | N(2)–C(1)–C(4)       | 122.4(6)  |

**Table S28.** Continued

| angle               | degree     | angle               | degree    |
|---------------------|------------|---------------------|-----------|
| C(11)–C(16)–H(16a)  | 119.5      | C(2)–N(2)–C(1)      | 109.9(6)  |
| O(3b)–C(17)–O(3a)   | 23.3(14)   | C(2)–N(2)–H(2a)     | 125.0     |
| O(3b)–C(17)–N(5)    | 130.4(8)   | C(1)–N(2)–H(2a)     | 125.0     |
| O(3a)–C(17)–N(5)    | 118.1(8)   | N(2)–C(2)–C(3)      | 106.0(3)  |
| O(3b)–C(17)–C(18b)  | 103.1(11)  | N(2)–C(2)–H(2b)     | 127.0     |
| O(3a)–C(17)–C(18b)  | 117.1(7)   | C(3)–C(2)–H(2b)     | 127.0     |
| N(5)–C(17)–C(18b)   | 124.6(3)   | C(2)–C(3)–N(1)      | 110.1(3)  |
| O(3b)–C(17)–C(18)   | 117.4(11)  | C(2)–C(3)–H(3a)     | 124.9     |
| O(3a)–C(17)–C(18)   | 130.6(7)   | N(1)–C(3)–H(3a)     | 124.9     |
| N(5)–C(17)–C(18)    | 110.6(2)   | C(1)–C(4)–H(4a)     | 109.5     |
| C(18b)–C(17)–C(18)  | 14.29(6)   | C(1)–C(4)–H(4b)     | 109.5     |
| C(21)–C(18)–C(19)   | 109.5      | H(4a)–C(4)–H(4b)    | 109.5     |
| C(21)–C(18)–C(20)   | 109.5      | C(1)–C(4)–H(4C)     | 109.5     |
| C(19)–C(18)–C(20)   | 109.5      | H(4a)–C(4)–H(4C)    | 109.5     |
| C(21)–C(18)–C(17)   | 116.72(15) | H(4b)–C(4)–H(4C)    | 109.5     |
| C(19)–C(18)–C(17)   | 105.27(16) | O(1S)–C(1S)–C(1S)#1 | 121.6(2)  |
| C(20)–C(18)–C(17)   | 106.20(17) | O(2S)–C(2S)–C(3S)   | 108.3(10) |
| C(18)–C(19)–H(19a)  | 109.5      | O(2S)–C(2S)–C(2S)#2 | 134.6(16) |
| C(18)–C(19)–H(19b)  | 109.5      | C(3S)–C(2S)–C(2S)#2 | 49.0(7)   |
| H(19a)–C(19)–H(19b) | 109.5      | C(2S)#2–C(3S)–C(2S) | 82.0(14)  |
| C(18)–C(19)–H(19C)  | 109.5      |                     |           |

<sup>a</sup>The estimated standard deviations of the least significant digits are given in parentheses.

**Table S29.** Anisotropic Displacement Parameters ( $\text{\AA}^2$ ) for  $[\text{Co}(\text{TpivPP})(2\text{-MeHIm})(\text{O}_2)] \cdot 1.8\text{C}_2\text{H}_5\text{OH}^a$   
(100 K,  $C2/c$  form)<sup>a</sup>

| atom  | $U_{11}$   | $U_{22}$   | $U_{33}$   | $U_{23}$    | $U_{13}$    | $U_{12}$    |
|-------|------------|------------|------------|-------------|-------------|-------------|
| Co(1) | 0.0220(1)  | 0.0199(1)  | 0.0143(1)  | 0.000       | -0.0002(1)  | 0.000       |
| O(1)  | 0.0656(15) | 0.0234(9)  | 0.0504(13) | 0.000       | 0.0112(11)  | 0.000       |
| O(2)  | 0.060(2)   | 0.0375(16) | 0.064(2)   | 0.0044(15)  | -0.0085(17) | 0.0081(15)  |
| N(3)  | 0.0244(6)  | 0.0260(6)  | 0.0161(5)  | -0.0003(4)  | 0.0002(4)   | -0.0006(5)  |
| N(4)  | 0.0241(6)  | 0.0227(6)  | 0.0160(5)  | 0.0010(4)   | -0.0003(4)  | 0.0014(4)   |
| N(5)  | 0.0528(10) | 0.0316(8)  | 0.0295(8)  | 0.0056(6)   | 0.0079(7)   | -0.0022(7)  |
| N(6)  | 0.0238(7)  | 0.0433(9)  | 0.0650(12) | 0.0242(9)   | -0.0066(7)  | 0.0007(6)   |
| C(A1) | 0.0248(7)  | 0.0296(8)  | 0.0209(7)  | -0.0006(6)  | 0.0011(5)   | -0.0018(6)  |
| C(A2) | 0.0262(7)  | 0.0271(7)  | 0.0187(7)  | 0.0002(5)   | 0.0027(5)   | -0.0007(6)  |
| C(A3) | 0.0283(7)  | 0.0228(7)  | 0.0160(6)  | 0.0007(5)   | -0.0001(5)  | 0.0010(5)   |
| C(A4) | 0.0265(7)  | 0.0255(7)  | 0.0175(6)  | 0.0026(5)   | -0.0022(5)  | 0.0017(5)   |
| C(B1) | 0.0253(7)  | 0.0431(9)  | 0.0238(8)  | 0.0001(7)   | 0.0023(6)   | -0.0036(7)  |
| C(B2) | 0.0275(8)  | 0.0405(9)  | 0.0224(7)  | 0.0012(6)   | 0.0041(6)   | -0.0029(7)  |
| C(B3) | 0.0318(8)  | 0.0362(9)  | 0.0162(6)  | 0.0004(6)   | -0.0019(6)  | 0.0012(6)   |
| C(B4) | 0.0295(8)  | 0.0375(9)  | 0.0180(7)  | 0.0017(6)   | -0.0037(6)  | 0.0015(6)   |
| C(M1) | 0.0283(7)  | 0.0241(7)  | 0.0163(6)  | 0.0003(5)   | 0.0018(5)   | 0.0003(5)   |
| C(M2) | 0.0242(7)  | 0.0281(7)  | 0.0217(7)  | 0.0022(5)   | -0.0021(5)  | 0.0018(6)   |
| C(5)  | 0.0264(7)  | 0.0331(8)  | 0.0166(6)  | -0.0027(6)  | 0.0015(5)   | 0.0006(6)   |
| C(6)  | 0.0331(8)  | 0.0395(9)  | 0.0182(7)  | 0.0017(6)   | 0.0020(6)   | -0.0031(7)  |
| C(7)  | 0.0374(10) | 0.0715(15) | 0.0184(7)  | 0.0041(8)   | 0.0042(7)   | -0.0117(10) |
| C(8)  | 0.0298(9)  | 0.0936(19) | 0.0210(8)  | -0.0173(10) | 0.0055(7)   | -0.0097(10) |
| C(9)  | 0.0315(9)  | 0.0662(14) | 0.0341(10) | -0.0267(10) | 0.0008(7)   | 0.0020(9)   |
| C(10) | 0.0342(9)  | 0.0377(9)  | 0.0309(9)  | -0.0110(7)  | 0.0006(7)   | 0.0009(7)   |
| C(11) | 0.0244(7)  | 0.0399(9)  | 0.0219(7)  | -0.0003(6)  | -0.0016(6)  | 0.0008(6)   |
| C(12) | 0.0244(7)  | 0.0451(10) | 0.0331(9)  | 0.0101(8)   | -0.0043(6)  | 0.0012(7)   |
| C(13) | 0.0288(9)  | 0.0624(14) | 0.0448(11) | 0.0058(10)  | -0.0112(8)  | 0.0054(9)   |
| C(14) | 0.0286(9)  | 0.0690(15) | 0.0511(13) | -0.0176(12) | -0.0125(9)  | 0.0014(9)   |
| C(15) | 0.0342(10) | 0.0517(13) | 0.0683(16) | -0.0236(12) | -0.0064(10) | -0.0068(9)  |
| C(16) | 0.0343(9)  | 0.0384(10) | 0.0470(11) | -0.0120(8)  | -0.0042(8)  | -0.0008(8)  |
| C(17) | 0.0389(10) | 0.0380(10) | 0.0630(15) | 0.0155(10)  | -0.0093(10) | -0.0091(8)  |
| C(18) | 0.0332(17) | 0.0316(16) | 0.028(2)   | 0.0046(12)  | -0.0079(12) | -0.0003(12) |
| C(19) | 0.032(2)   | 0.034(2)   | 0.044(2)   | 0.0011(14)  | -0.0084(14) | -0.0029(15) |
| C(20) | 0.039(2)   | 0.051(2)   | 0.075(4)   | 0.009(2)    | -0.018(2)   | -0.0004(18) |
| C(21) | 0.065(3)   | 0.0354(19) | 0.034(2)   | -0.0065(15) | 0.0096(17)  | -0.0043(18) |

**Table S29.** Continued

| atom   | $U_{11}$   | $U_{22}$   | $U_{33}$   | $U_{23}$    | $U_{13}$    | $U_{12}$    |
|--------|------------|------------|------------|-------------|-------------|-------------|
| C(18B) | 0.026(2)   | 0.032(2)   | 0.037(3)   | -0.0021(19) | -0.0036(18) | -0.0032(17) |
| C(19B) | 0.027(3)   | 0.053(4)   | 0.045(3)   | -0.019(3)   | 0.004(2)    | 0.009(3)    |
| C(20B) | 0.052(4)   | 0.029(3)   | 0.128(9)   | -0.008(4)   | -0.056(5)   | 0.007(3)    |
| C(21B) | 0.070(5)   | 0.050(4)   | 0.089(7)   | -0.034(4)   | 0.036(5)    | -0.009(4)   |
| C(22)  | 0.0315(9)  | 0.0535(12) | 0.0289(9)  | 0.0036(8)   | 0.0035(7)   | 0.0001(8)   |
| C(23)  | 0.0374(16) | 0.0433(16) | 0.0401(17) | 0.0055(12)  | 0.0120(11)  | -0.0079(12) |
| C(25)  | 0.0320(15) | 0.079(3)   | 0.079(3)   | -0.021(2)   | 0.0071(17)  | -0.0165(16) |
| C(24)  | 0.084(3)   | 0.058(2)   | 0.063(2)   | 0.0232(18)  | 0.0159(19)  | -0.0090(19) |
| C(26)  | 0.062(2)   | 0.066(2)   | 0.0483(18) | -0.0126(16) | 0.0058(15)  | -0.0223(17) |
| C(23B) | 0.040(7)   | 0.064(10)  | 0.040(8)   | 0.030(7)    | 0.019(5)    | 0.024(7)    |
| C(25B) | 0.075(13)  | 0.104(16)  | 0.034(7)   | 0.021(8)    | -0.005(7)   | 0.011(11)   |
| C(24B) | 0.062(10)  | 0.047(8)   | 0.121(18)  | 0.015(9)    | -0.015(10)  | 0.011(7)    |
| C(26B) | 0.037(6)   | 0.054(7)   | 0.033(5)   | 0.001(5)    | 0.003(4)    | -0.006(5)   |
| O(4A)  | 0.032(2)   | 0.032(2)   | 0.077(7)   | -0.010(3)   | 0.018(3)    | 0.0005(14)  |
| O(3A)  | 0.069(4)   | 0.049(4)   | 0.073(3)   | 0.024(2)    | 0.020(3)    | -0.010(3)   |
| O(4B)  | 0.037(3)   | 0.059(8)   | 0.048(5)   | -0.011(5)   | -0.012(3)   | 0.022(4)    |
| O(3B)  | 0.088(11)  | 0.050(4)   | 0.036(5)   | 0.017(3)    | -0.005(4)   | 0.004(5)    |
| N(1)   | 0.020(3)   | 0.0244(10) | 0.014(3)   | 0.0012(10)  | 0.0008(15)  | -0.0017(10) |
| C(1)   | 0.0229(14) | 0.0239(14) | 0.0218(14) | -0.0016(11) | 0.0004(13)  | -0.0044(11) |
| N(2)   | 0.0280(12) | 0.0237(11) | 0.0265(11) | -0.007(5)   | 0.0005(9)   | 0.011(4)    |
| C(2)   | 0.0256(14) | 0.0287(15) | 0.0226(14) | -0.0013(11) | 0.0009(11)  | 0.0014(12)  |
| C(3)   | 0.0224(14) | 0.0293(16) | 0.0189(14) | 0.0006(13)  | 0.0037(12)  | 0.0025(13)  |
| C(4)   | 0.0363(18) | 0.0231(15) | 0.0370(19) | -0.0008(14) | 0.0155(17)  | -0.0074(13) |
| O(1S)  | 0.0472(17) | 0.0320(14) | 0.073(2)   | -0.0060(14) | 0.0304(16)  | -0.0009(13) |
| C(1S)  | 0.144(4)   | 0.065(2)   | 0.127(4)   | -0.020(2)   | 0.083(3)    | -0.031(2)   |
| C(2S)  | 0.140(10)  | 0.071(6)   | 0.056(5)   | -0.004(4)   | -0.023(5)   | -0.023(6)   |
| C(3S)  | 0.089(6)   | 0.159(11)  | 0.165(11)  | 0.000       | 0.036(7)    | 0.000       |
| O(2S)  | 0.261(13)  | 0.064(4)   | 0.125(7)   | 0.028(5)    | -0.077(8)   | -0.010(6)   |

<sup>a</sup>The estimated standard deviations of the least significant digits are given in parentheses.

The anisotropic displacement factor exponent takes the form:  $-2 \pi [\text{h}^2 U_{11} + \dots + 2 \text{h k a}^* \text{ b}^* U_{12}]$ .

**Table S30.** Hydrogen Atom Coordinates and Equivalent Isotropic Displacement Parameters ( $\text{\AA}^2$ ) for  $[\text{Co}(\text{TpivPP})(2\text{-MeHIm})(\text{O}_2)] \cdot 1.8\text{C}_2\text{H}_5\text{OH}^a$  (100 K,  $C2/c$  form)<sup>a</sup>

| atom   | $x$    | $y$    | $z$    | $U(\text{eq})$ |
|--------|--------|--------|--------|----------------|
| H(5A)  | 0.4021 | 0.7503 | 0.9559 | 0.045          |
| H(6A)  | 0.6836 | 0.7370 | 0.8829 | 0.053          |
| H(BA)  | 0.2316 | 0.8434 | 0.7930 | 0.037          |
| H(BB)  | 0.2846 | 0.8488 | 0.9214 | 0.036          |
| H(BC)  | 0.5459 | 0.8707 | 1.0332 | 0.034          |
| H(BD)  | 0.6670 | 0.8657 | 0.9792 | 0.034          |
| H(7A)  | 0.3467 | 0.7707 | 1.1424 | 0.051          |
| H(8A)  | 0.3386 | 0.8772 | 1.2012 | 0.058          |
| H(9A)  | 0.3707 | 0.9766 | 1.1398 | 0.053          |
| H(10A) | 0.4116 | 0.9710 | 1.0167 | 0.041          |
| H(13A) | 0.8599 | 0.7482 | 0.9334 | 0.055          |
| H(14A) | 0.9298 | 0.8466 | 0.9340 | 0.060          |
| H(15A) | 0.8848 | 0.9485 | 0.8857 | 0.062          |
| H(16A) | 0.7676 | 0.9534 | 0.8399 | 0.048          |
| H(19A) | 0.3196 | 0.5625 | 0.9012 | 0.055          |
| H(19B) | 0.2834 | 0.6303 | 0.9335 | 0.055          |
| H(19C) | 0.3068 | 0.5698 | 0.9891 | 0.055          |
| H(20A) | 0.4504 | 0.5396 | 0.9366 | 0.083          |
| H(20B) | 0.4278 | 0.5494 | 1.0219 | 0.083          |
| H(20C) | 0.4909 | 0.5946 | 0.9884 | 0.083          |
| H(21A) | 0.4154 | 0.6224 | 0.8417 | 0.067          |
| H(21B) | 0.4615 | 0.6784 | 0.8865 | 0.067          |
| H(21C) | 0.3797 | 0.6935 | 0.8651 | 0.067          |
| H(19D) | 0.2926 | 0.5866 | 1.0077 | 0.062          |
| H(19E) | 0.3179 | 0.5615 | 0.9272 | 0.062          |
| H(19F) | 0.2892 | 0.6379 | 0.9379 | 0.062          |
| H(20D) | 0.4808 | 0.5821 | 1.0283 | 0.105          |
| H(20E) | 0.4340 | 0.5276 | 0.9819 | 0.105          |
| H(20F) | 0.4087 | 0.5527 | 1.0624 | 0.105          |
| H(21D) | 0.4756 | 0.6611 | 0.9210 | 0.104          |
| H(21E) | 0.4001 | 0.6831 | 0.8854 | 0.104          |
| H(21F) | 0.4288 | 0.6066 | 0.8747 | 0.104          |
| H(25A) | 0.6094 | 0.6680 | 0.8258 | 0.095          |
| H(25B) | 0.6151 | 0.6563 | 0.9144 | 0.095          |

**Table S30.** Continued

| atom   | <i>x</i> | <i>y</i> | <i>z</i> | <i>U</i> (eq) |
|--------|----------|----------|----------|---------------|
| H(25C) | 0.5889   | 0.5953   | 0.8607   | 0.095         |
| H(24A) | 0.7642   | 0.5449   | 0.9136   | 0.103         |
| H(24B) | 0.6827   | 0.5207   | 0.9138   | 0.103         |
| H(24C) | 0.7088   | 0.5817   | 0.9675   | 0.103         |
| H(26A) | 0.6946   | 0.6115   | 0.7429   | 0.088         |
| H(26B) | 0.6740   | 0.5388   | 0.7777   | 0.088         |
| H(26C) | 0.7556   | 0.5629   | 0.7774   | 0.088         |
| H(25D) | 0.6014   | 0.5779   | 0.8795   | 0.107         |
| H(25E) | 0.6132   | 0.6590   | 0.8777   | 0.107         |
| H(25F) | 0.6524   | 0.6136   | 0.9407   | 0.107         |
| H(24D) | 0.6933   | 0.5002   | 0.8383   | 0.115         |
| H(24E) | 0.7460   | 0.5301   | 0.9018   | 0.115         |
| H(24F) | 0.7702   | 0.5285   | 0.8164   | 0.115         |
| H(26D) | 0.6405   | 0.5761   | 0.7446   | 0.062         |
| H(26E) | 0.7155   | 0.6100   | 0.7247   | 0.062         |
| H(26F) | 0.6507   | 0.6572   | 0.7506   | 0.062         |
| H(2A)  | 0.5126   | 1.1221   | 0.7340   | 0.031         |
| H(2B)  | 0.4249   | 1.1032   | 0.8289   | 0.031         |
| H(3A)  | 0.4117   | 0.9780   | 0.8379   | 0.028         |
| H(4A)  | 0.5930   | 0.9691   | 0.6567   | 0.048         |
| H(4B)  | 0.6256   | 1.0398   | 0.6870   | 0.048         |
| H(4C)  | 0.5659   | 1.0402   | 0.6217   | 0.048         |

<sup>a</sup>*U*(eq) is defined as one third of the trace of the orthogonalized  $\mathbf{U}_{ij}$  tensor.

The estimated standard deviations of the least significant digits are given in parentheses.

## Supporting Information

**Table S31.** Complete Crystallographic Details for [Co(TpivPP)(2-MeHIm)<sub>0.4</sub>(O<sub>2</sub>)]·2C<sub>2</sub>H<sub>5</sub>OH (100 K, C2/c form)

|                                                              |                                                                    |
|--------------------------------------------------------------|--------------------------------------------------------------------|
| formula                                                      | C <sub>72</sub> H <sub>82</sub> CoN <sub>10</sub> O <sub>6.8</sub> |
| FW, amu                                                      | 1255.21                                                            |
| <i>a</i> , Å                                                 | 18.5678(7)                                                         |
| <i>b</i> , Å                                                 | 19.5594(8)                                                         |
| <i>c</i> , Å                                                 | 17.8219(6)                                                         |
| $\beta$ , deg                                                | 90.954(2)                                                          |
| <i>V</i> , Å <sup>3</sup>                                    | 6471.6(4)                                                          |
| space group                                                  | C2/c                                                               |
| <i>Z</i>                                                     | 4                                                                  |
| D <sub>c</sub> , g/cm <sup>3</sup>                           | 1.288                                                              |
| F(000)                                                       | 2662                                                               |
| $\mu$ , mm <sup>-1</sup>                                     | 0.328                                                              |
| crystal dimensions, mm                                       | 0.50 × 0.22 × 0.21                                                 |
| radiation                                                    | MoK $\alpha$ , $\bar{\lambda}$ = 0.71073 Å                         |
| temperature, K                                               | 100(2)                                                             |
| diffractometer                                               | Bruker Apex CCD                                                    |
| $\theta$ range for collected data, deg                       | 1.51–27.28                                                         |
| index range                                                  | –23 ≤ <i>h</i> ≤ 23<br>–25 ≤ <i>k</i> ≤ 25<br>–19 ≤ <i>l</i> ≤ 22  |
| total data collected                                         | 79057                                                              |
| absorption correction                                        | Semi-empirical from equiv                                          |
| relative transmission coefficients (I)                       | 0.9343 and 0.8532                                                  |
| unique data                                                  | 7227 ( <i>R</i> <sub>int</sub> = 0.0265)                           |
| unique observed data [ <i>I</i> > 2 $\sigma$ ( <i>I</i> )]   | 6388                                                               |
| refinement method                                            | Full-matrix least-squares on F <sup>2</sup>                        |
| data/restraints/parameters                                   | 7227/0/453                                                         |
| goodness-of-fit (based on <i>F</i> <sup>2</sup> )            | 1.078                                                              |
| final <i>R</i> indices [ <i>I</i> > 2 $\sigma$ ( <i>I</i> )] | <i>R</i> <sub>1</sub> = 0.0509, <i>wR</i> <sub>2</sub> = 0.1399    |
| final <i>R</i> indices (all data)                            | <i>R</i> <sub>1</sub> = 0.0593, <i>wR</i> <sub>2</sub> = 0.1512    |

**Table S32.** Atomic Coordinates and Equivalent Isotropic Displacement Parameters ( $\text{\AA}^2$ ) for  $[\text{Co}(\text{TpivPP})(2\text{-MeHIm})0.4(\text{O}_2)] \cdot 2\text{C}_2\text{H}_5\text{OH}^a$  (100 K,  $C2/c$  form)<sup>a</sup>

| atom  | <i>x</i>    | <i>y</i>    | <i>z</i>    | <i>U</i> (eq) |
|-------|-------------|-------------|-------------|---------------|
| Co(1) | 0.5000      | 0.86468(2)  | 0.7500      | 0.0167(1)     |
| N(1)  | 0.45824(9)  | 0.86145(8)  | 0.64747(9)  | 0.0191(3)     |
| N(2)  | 0.40274(9)  | 0.85694(8)  | 0.79257(9)  | 0.0197(3)     |
| N(5)  | 0.61102(12) | 0.74416(10) | 0.49953(11) | 0.0343(4)     |
| N(6)  | 0.27034(10) | 0.73201(11) | 0.62130(12) | 0.0354(5)     |
| O(1)  | 0.5000      | 0.7658(3)   | 0.7500      | 0.0390(14)    |
| O(2)  | 0.4589(6)   | 0.7305(5)   | 0.7273(6)   | 0.047(2)      |
| O(3)  | 0.62257(18) | 0.66155(13) | 0.41310(14) | 0.0801(9)     |
| O(4)  | 0.18435(11) | 0.65489(13) | 0.63957(17) | 0.0721(8)     |
| C(a1) | 0.49405(11) | 0.86482(10) | 0.58069(11) | 0.0213(4)     |
| C(a2) | 0.38679(11) | 0.86074(10) | 0.62759(11) | 0.0208(4)     |
| C(a3) | 0.33846(11) | 0.85274(10) | 0.75383(11) | 0.0218(4)     |
| C(a4) | 0.38443(11) | 0.85603(10) | 0.86706(11) | 0.0214(4)     |
| C(b1) | 0.44388(12) | 0.86729(11) | 0.51848(11) | 0.0266(4)     |
| C(b2) | 0.37773(12) | 0.86479(11) | 0.54725(11) | 0.0262(4)     |
| C(b3) | 0.27932(11) | 0.84762(12) | 0.80473(12) | 0.0268(4)     |
| C(b4) | 0.30793(11) | 0.85019(11) | 0.87466(12) | 0.0262(4)     |
| C(m1) | 0.56797(11) | 0.86254(10) | 0.57259(11) | 0.0207(4)     |
| C(m2) | 0.32985(11) | 0.85550(10) | 0.67652(11) | 0.0211(4)     |
| C(5)  | 0.59710(11) | 0.86527(11) | 0.49483(11) | 0.0239(4)     |
| C(6)  | 0.61675(12) | 0.80526(12) | 0.45819(12) | 0.0290(5)     |
| C(7)  | 0.64108(13) | 0.80781(16) | 0.38461(13) | 0.0416(6)     |
| C(8)  | 0.64522(13) | 0.86938(18) | 0.34862(13) | 0.0463(7)     |
| C(9)  | 0.62646(13) | 0.92911(16) | 0.38373(14) | 0.0432(7)     |
| C(10) | 0.60269(12) | 0.92692(13) | 0.45724(13) | 0.0326(5)     |
| C(11) | 0.61379(14) | 0.67860(14) | 0.47819(16) | 0.0422(6)     |
| C(12) | 0.25537(11) | 0.85213(12) | 0.64401(11) | 0.0253(4)     |
| C(13) | 0.22716(11) | 0.79110(12) | 0.61663(12) | 0.0286(4)     |
| C(14) | 0.15797(13) | 0.78917(15) | 0.58546(14) | 0.0379(5)     |
| C(15) | 0.11664(14) | 0.84743(16) | 0.58450(16) | 0.0454(7)     |
| C(16) | 0.14310(14) | 0.90751(15) | 0.61289(18) | 0.0480(7)     |
| C(17) | 0.21250(13) | 0.91013(13) | 0.64154(15) | 0.0365(5)     |
| C(18) | 0.24763(12) | 0.66798(13) | 0.63516(13) | 0.0326(5)     |
| C(19) | 0.60814(14) | 0.62634(13) | 0.54197(19) | 0.0448(7)     |



**Table S32.** Continued

| atom  | <i>x</i>    | <i>y</i>    | <i>z</i>    | <i>U</i> (eq) |
|-------|-------------|-------------|-------------|---------------|
| C(20) | 0.68312(14) | 0.59515(14) | 0.55078(18) | 0.0458(7)     |
| C(21) | 0.55410(18) | 0.57142(17) | 0.5184(3)   | 0.0851(15)    |
| C(22) | 0.58529(19) | 0.65642(16) | 0.6177(2)   | 0.0571(8)     |
| C(23) | 0.30428(13) | 0.61227(14) | 0.64464(15) | 0.0382(5)     |
| C(24) | 0.2889(2)   | 0.5618(2)   | 0.5809(2)   | 0.0707(10)    |
| C(25) | 0.29259(17) | 0.57880(17) | 0.71910(18) | 0.0550(8)     |
| C(26) | 0.38123(15) | 0.63853(17) | 0.6393(2)   | 0.0561(8)     |
| O(1S) | 0.0522(2)   | 0.70269(19) | 0.6897(2)   | 0.0470(10)    |
| C(1S) | 0.0271(3)   | 0.7606(2)   | 0.7190(3)   | 0.0978(18)    |
| N(3)  | 0.5093(5)   | 0.97182(17) | 0.7419(6)   | 0.0209(15)    |
| C(1)  | 0.5566(3)   | 1.0034(3)   | 0.6938(3)   | 0.0242(9)     |
| C(2)  | 0.5508(2)   | 1.0713(2)   | 0.6986(2)   | 0.0254(8)     |
| N(4)  | 0.5000      | 1.08274(13) | 0.7500      | 0.0245(5)     |
| C(3)  | 0.4753(2)   | 1.0223(2)   | 0.7755(3)   | 0.0221(8)     |
| C(4)  | 0.4189(3)   | 1.0175(2)   | 0.8320(3)   | 0.0294(10)    |
| O(2S) | 0.5476(4)   | 0.5427(3)   | 0.3445(3)   | 0.0827(17)    |
| C(2S) | 0.5411(5)   | 0.5586(4)   | 0.2734(4)   | 0.070(2)      |
| C(3S) | 0.5000      | 0.5127(7)   | 0.2500      | 0.153(4)      |

<sup>a</sup>*U*(eq) is defined as one third of the trace of the orthogonalized  $\mathbf{U}_{ij}$  tensor.

The estimated standard deviations of the least significant digits are given in parentheses.

**Table S33.** Bond Lengths for [Co(TpivPP)(2-MeHIm)<sub>0.4</sub>(O<sub>2</sub>)]·2C<sub>2</sub>H<sub>5</sub>OH<sup>a</sup> (100 K, C2/c form)<sup>a</sup>

| bond          | length (Å) | bond           | length (Å) |
|---------------|------------|----------------|------------|
| Co(1)–O(1)    | 1.934(6)   | C(14)–C(15)    | 1.374(4)   |
| Co(1)–N(1)#1) | 1.9741(16) | C(14)–H(14a)   | 0.9500     |
| Co(1)–N(1)    | 1.9741(16) | C(15)–C(16)    | 1.367(4)   |
| Co(1)–N(2)    | 1.9761(17) | C(15)–H(15a)   | 0.9500     |
| Co(1)–N(2)#1) | 1.9762(17) | C(16)–C(17)    | 1.379(4)   |
| Co(1)–N(3)    | 2.108(3)   | C(16)–H(16a)   | 0.9500     |
| Co(1)–N(3)#1) | 2.108(3)   | C(17)–H(17a)   | 0.9500     |
| N(1)–C(a2)    | 1.367(3)   | C(18)–C(23)    | 1.522(3)   |
| N(1)–C(a1)    | 1.374(3)   | C(19)–C(21)    | 1.524(4)   |
| N(2)–C(a3)    | 1.371(3)   | C(19)–C(20)    | 1.526(3)   |
| N(2)–C(a4)    | 1.376(2)   | C(19)–C(22)    | 1.538(5)   |
| N(5)–C(11)    | 1.339(3)   | C(20)–H(20a)   | 0.9800     |
| N(5)–C(6)     | 1.409(3)   | C(20)–H(20b)   | 0.9800     |
| N(5)–H(5a)    | 0.8800     | C(20)–H(20C)   | 0.9800     |
| N(6)–C(18)    | 1.346(3)   | C(21)–H(21a)   | 0.9800     |
| N(6)–C(13)    | 1.408(3)   | C(21)–H(21b)   | 0.9800     |
| N(6)–H(6a)    | 0.8800     | C(21)–H(21C)   | 0.9800     |
| O(1)–O(2)#1)  | 1.100(9)   | C(22)–H(22a)   | 0.9800     |
| O(1)–O(2)     | 1.100(9)   | C(22)–H(22b)   | 0.9800     |
| O(2)–O(2)#1)  | 1.71(2)    | C(22)–H(22C)   | 0.9800     |
| O(3)–C(11)    | 1.221(4)   | C(23)–C(25)    | 1.499(4)   |
| O(4)–C(18)    | 1.206(3)   | C(23)–C(26)    | 1.523(4)   |
| C(a1)–C(m1)   | 1.383(3)   | C(23)–C(24)    | 1.529(4)   |
| C(a1)–C(b1)   | 1.437(3)   | C(24)–H(24a)   | 0.9800     |
| C(a2)–C(m2)   | 1.385(3)   | C(24)–H(24b)   | 0.9800     |
| C(a2)–C(b2)   | 1.441(3)   | C(24)–H(24C)   | 0.9800     |
| C(a3)–C(m2)   | 1.385(3)   | C(25)–H(25a)   | 0.9800     |
| C(a3)–C(b3)   | 1.440(3)   | C(25)–H(25b)   | 0.9800     |
| C(a4)–C(m1#1) | 1.387(3)   | C(25)–H(25C)   | 0.9800     |
| C(a4)–C(b4)   | 1.434(3)   | C(26)–H(26a)   | 0.9800     |
| C(b1)–C(b2)   | 1.340(3)   | C(26)–H(26b)   | 0.9800     |
| C(b1)–H(ba)   | 0.9500     | C(26)–H(26C)   | 0.9800     |
| C(b2)–H(bb)   | 0.9500     | O(1S)–C(1S)    | 1.335(5)   |
| C(b3)–C(b4)   | 1.348(3)   | C(1S)–C(1S)#2) | 1.507(7)   |

**Table S33.** Continued

| bond          | length (Å) | bond          | length (Å) |
|---------------|------------|---------------|------------|
| C(b3)–H(bC)   | 0.9500     | N(3)–C(3)     | 1.322(6)   |
| C(b4)–H(bd)   | 0.9500     | N(3)–C(1)     | 1.383(7)   |
| C(m1)–C(a4#1) | 1.387(3)   | C(1)–C(2)     | 1.336(7)   |
| C(m1)–C(5)    | 1.497(3)   | C(1)–H(1a)    | 0.9500     |
| C(m2)–C(12)   | 1.492(3)   | C(2)–N(4)     | 1.345(4)   |
| C(5)–C(10)    | 1.384(3)   | C(2)–H(2a)    | 0.9500     |
| C(5)–C(6)     | 1.395(3)   | N(4)–C(2)#1   | 1.345(4)   |
| C(6)–C(7)     | 1.395(3)   | N(4)–C(3)#1   | 1.349(5)   |
| C(7)–C(8)     | 1.367(4)   | N(4)–C(3)     | 1.349(5)   |
| C(7)–H(7a)    | 0.9500     | N(4)–H(4a)    | 0.8800     |
| C(8)–C(9)     | 1.373(4)   | C(3)–C(4)     | 1.468(7)   |
| C(8)–H(8a)    | 0.9500     | C(4)–H(4b)    | 0.9800     |
| C(9)–C(10)    | 1.390(3)   | C(4)–H(4C)    | 0.9800     |
| C(9)–H(9a)    | 0.9500     | C(4)–H(4d)    | 0.9800     |
| C(10)–H(10a)  | 0.9500     | O(2S)–C(2S)   | 1.308(8)   |
| C(11)–C(19)   | 1.534(4)   | C(2S)–C(3S)   | 1.245(11)  |
| C(12)–C(17)   | 1.386(3)   | C(3S)–C(2S)#3 | 1.245(11)  |
| C(12)–C(13)   | 1.389(3)   |               |            |
| C(13)–C(14)   | 1.392(3)   |               |            |

<sup>a</sup>The estimated standard deviations of the least significant digits are given in parentheses.

**Table S34.** Bond Angles for [Co(TpivPP)(2-MeHIm)<sub>0.4</sub>(O<sub>2</sub>)]·2C<sub>2</sub>H<sub>5</sub>OH<sup>a</sup> (100 K, C2/c form)<sup>a</sup>

| angle               | degree     | angle               | degree   |
|---------------------|------------|---------------------|----------|
| O(1)–Co(1)–N(1)#1   | 88.17(5)   | C(13)–C(14)–H(14a)  | 120.2    |
| O(1)–Co(1)–N(1)     | 88.17(5)   | C(16)–C(15)–C(14)   | 120.7(2) |
| N(1)#1–Co(1)–N(1)   | 176.33(9)  | C(16)–C(15)–H(15a)  | 119.6    |
| O(1)–Co(1)–N(2)     | 85.61(5)   | C(14)–C(15)–H(15a)  | 119.6    |
| N(1)#1–Co(1)–N(2)   | 89.40(7)   | C(15)–C(16)–C(17)   | 119.8(3) |
| N(1)–Co(1)–N(2)     | 90.32(7)   | C(15)–C(16)–H(16a)  | 120.1    |
| O(1)–Co(1)–N(2)#1   | 85.61(5)   | C(17)–C(16)–H(16a)  | 120.1    |
| N(1)#1–Co(1)–N(2)#1 | 90.32(7)   | C(16)–C(17)–C(12)   | 120.9(3) |
| N(1)–Co(1)–N(2)#1   | 89.40(7)   | C(16)–C(17)–H(17a)  | 119.5    |
| N(2)–Co(1)–N(2)#1   | 171.21(9)  | C(12)–C(17)–H(17a)  | 119.5    |
| O(1)–Co(1)–N(3)     | 173.81(15) | O(4)–C(18)–N(6)     | 121.2(2) |
| N(1)#1–Co(1)–N(3)   | 93.7(4)    | O(4)–C(18)–C(23)    | 120.9(2) |
| N(1)–Co(1)–N(3)     | 90.0(4)    | N(6)–C(18)–C(23)    | 117.9(2) |
| N(2)–Co(1)–N(3)     | 100.30(18) | C(21)–C(19)–C(20)   | 110.0(2) |
| N(2)#1–Co(1)–N(3)   | 88.48(18)  | C(21)–C(19)–C(11)   | 108.6(3) |
| O(1)–Co(1)–N(3)#1   | 173.81(14) | C(20)–C(19)–C(11)   | 105.6(2) |
| N(1)#1–Co(1)–N(3)#1 | 90.0(4)    | C(21)–C(19)–C(22)   | 108.7(3) |
| N(1)–Co(1)–N(3)#1   | 93.7(4)    | C(20)–C(19)–C(22)   | 109.1(3) |
| N(2)–Co(1)–N(3)#1   | 88.48(18)  | C(11)–C(19)–C(22)   | 114.7(2) |
| N(2)#1–Co(1)–N(3)#1 | 100.30(18) | C(19)–C(20)–H(20a)  | 109.5    |
| N(3)–Co(1)–N(3)#1   | 12.4(3)    | C(19)–C(20)–H(20b)  | 109.5    |
| C(a2)–N(1)–C(a1)    | 104.92(16) | H(20a)–C(20)–H(20b) | 109.5    |
| C(a2)–N(1)–Co(1)    | 127.19(13) | C(19)–C(20)–H(20C)  | 109.5    |
| C(a1)–N(1)–Co(1)    | 127.72(14) | H(20a)–C(20)–H(20C) | 109.5    |
| C(a3)–N(2)–C(a4)    | 104.95(16) | H(20b)–C(20)–H(20C) | 109.5    |
| C(a3)–N(2)–Co(1)    | 127.20(13) | C(19)–C(21)–H(21a)  | 109.5    |
| C(a4)–N(2)–Co(1)    | 127.84(14) | C(19)–C(21)–H(21b)  | 109.5    |
| C(11)–N(5)–C(6)     | 131.3(2)   | H(21a)–C(21)–H(21b) | 109.5    |
| C(11)–N(5)–H(5a)    | 114.3      | C(19)–C(21)–H(21C)  | 109.5    |
| C(6)–N(5)–H(5a)     | 114.3      | H(21a)–C(21)–H(21C) | 109.5    |
| C(18)–N(6)–C(13)    | 126.50(19) | H(21b)–C(21)–H(21C) | 109.5    |
| C(18)–N(6)–H(6a)    | 116.8      | C(19)–C(22)–H(22a)  | 109.5    |
| C(13)–N(6)–H(6a)    | 116.8      | C(19)–C(22)–H(22b)  | 109.5    |
| O(2)#1–O(1)–O(2)    | 102.4(11)  | H(22a)–C(22)–H(22b) | 109.5    |

**Table S34.** Continued

| angle               | degree     | angle               | degree   |
|---------------------|------------|---------------------|----------|
| O(2)#1–O(1)–Co(1)   | 128.8(6)   | C(19)–C(22)–H(22C)  | 109.5    |
| O(2)–O(1)–Co(1)     | 128.8(6)   | H(22a)–C(22)–H(22C) | 109.5    |
| O(1)–O(2)–O(2)#1    | 38.8(6)    | H(22b)–C(22)–H(22C) | 109.5    |
| N(1)–C(a1)–C(m1)    | 125.74(18) | C(25)–C(23)–C(18)   | 107.5(2) |
| N(1)–C(a1)–C(b1)    | 110.67(18) | C(25)–C(23)–C(26)   | 110.6(3) |
| C(m1)–C(a1)–C(b1)   | 123.51(19) | C(18)–C(23)–C(26)   | 113.5(2) |
| N(1)–C(a2)–C(m2)    | 125.80(18) | C(25)–C(23)–C(24)   | 110.4(3) |
| N(1)–C(a2)–C(b2)    | 110.71(18) | C(18)–C(23)–C(24)   | 105.1(2) |
| C(m2)–C(a2)–C(b2)   | 123.48(19) | C(26)–C(23)–C(24)   | 109.6(3) |
| N(2)–C(a3)–C(m2)    | 125.69(18) | C(23)–C(24)–H(24a)  | 109.5    |
| N(2)–C(a3)–C(b3)    | 110.71(17) | C(23)–C(24)–H(24b)  | 109.5    |
| C(m2)–C(a3)–C(b3)   | 123.56(19) | H(24a)–C(24)–H(24b) | 109.5    |
| N(2)–C(a4)–C(m1#1)  | 125.64(19) | C(23)–C(24)–H(24C)  | 109.5    |
| N(2)–C(a4)–C(b4)    | 110.69(17) | H(24a)–C(24)–H(24C) | 109.5    |
| C(m1#1)–C(a4)–C(b4) | 123.62(19) | H(24b)–C(24)–H(24C) | 109.5    |
| C(b2)–C(b1)–C(a1)   | 106.87(18) | C(23)–C(25)–H(25a)  | 109.5    |
| C(b2)–C(b1)–H(ba)   | 126.6      | C(23)–C(25)–H(25b)  | 109.5    |
| C(a1)–C(b1)–H(ba)   | 126.6      | H(25a)–C(25)–H(25b) | 109.5    |
| C(b1)–C(b2)–C(a2)   | 106.83(19) | C(23)–C(25)–H(25C)  | 109.5    |
| C(b1)–C(b2)–H(bb)   | 126.6      | H(25a)–C(25)–H(25C) | 109.5    |
| C(a2)–C(b2)–H(bb)   | 126.6      | H(25b)–C(25)–H(25C) | 109.5    |
| C(b4)–C(b3)–C(a3)   | 106.69(18) | C(23)–C(26)–H(26a)  | 109.5    |
| C(b4)–C(b3)–H(bC)   | 126.7      | C(23)–C(26)–H(26b)  | 109.5    |
| C(a3)–C(b3)–H(bC)   | 126.7      | H(26a)–C(26)–H(26b) | 109.5    |
| C(b3)–C(b4)–C(a4)   | 106.95(18) | C(23)–C(26)–H(26C)  | 109.5    |
| C(b3)–C(b4)–H(bd)   | 126.5      | H(26a)–C(26)–H(26C) | 109.5    |
| C(a4)–C(b4)–H(bd)   | 126.5      | H(26b)–C(26)–H(26C) | 109.5    |
| C(a1)–C(m1)–C(a4#1) | 122.87(18) | O(1S)–C(1S)–C(1S)#2 | 121.9(2) |
| C(a1)–C(m1)–C(5)    | 118.03(18) | C(3)–N(3)–C(1)      | 105.1(4) |
| C(a4#1)–C(m1)–C(5)  | 119.08(18) | C(3)–N(3)–Co(1)     | 132.2(4) |
| C(a3)–C(m2)–C(a2)   | 123.51(19) | C(1)–N(3)–Co(1)     | 122.7(3) |
| C(a3)–C(m2)–C(12)   | 118.39(18) | C(2)–C(1)–N(3)      | 110.6(5) |
| C(a2)–C(m2)–C(12)   | 118.10(18) | C(2)–C(1)–H(1a)     | 124.7    |
| C(10)–C(5)–C(6)     | 119.0(2)   | N(3)–C(1)–H(1a)     | 124.7    |

**Table S34.** Continued

| angle              | degree     | angle               | degree    |
|--------------------|------------|---------------------|-----------|
| C(10)–C(5)–C(m1)   | 120.7(2)   | C(1)–C(2)–N(4)      | 105.4(4)  |
| C(6)–C(5)–C(m1)    | 120.32(18) | C(1)–C(2)–H(2a)     | 127.3     |
| C(5)–C(6)–C(7)     | 120.1(2)   | N(4)–C(2)–H(2a)     | 127.3     |
| C(5)–C(6)–N(5)     | 116.52(18) | C(2)#1–N(4)–C(2)    | 160.9(4)  |
| C(7)–C(6)–N(5)     | 123.4(2)   | C(2)#1–N(4)–C(3)#1  | 109.3(3)  |
| C(8)–C(7)–C(6)     | 119.6(3)   | C(2)–N(4)–C(3)#1    | 51.6(3)   |
| C(8)–C(7)–H(7a)    | 120.2      | C(2)#1–N(4)–C(3)    | 51.6(3)   |
| C(6)–C(7)–H(7a)    | 120.2      | C(2)–N(4)–C(3)      | 109.3(3)  |
| C(7)–C(8)–C(9)     | 121.3(2)   | C(3)#1–N(4)–C(3)    | 57.7(4)   |
| C(7)–C(8)–H(8a)    | 119.4      | C(2)#1–N(4)–H(4a)   | 73.7      |
| C(9)–C(8)–H(8a)    | 119.4      | C(2)–N(4)–H(4a)     | 125.3     |
| C(8)–C(9)–C(10)    | 119.4(2)   | C(3)#1–N(4)–H(4a)   | 176.9     |
| C(8)–C(9)–H(9a)    | 120.3      | C(3)–N(4)–H(4a)     | 125.3     |
| C(10)–C(9)–H(9a)   | 120.3      | N(3)–C(3)–N(4)      | 109.5(4)  |
| C(5)–C(10)–C(9)    | 120.7(2)   | N(3)–C(3)–C(4)      | 127.9(4)  |
| C(5)–C(10)–H(10a)  | 119.7      | N(4)–C(3)–C(4)      | 122.6(4)  |
| C(9)–C(10)–H(10a)  | 119.7      | C(3)–C(4)–H(4b)     | 109.5     |
| O(3)–C(11)–N(5)    | 122.5(3)   | C(3)–C(4)–H(4C)     | 109.5     |
| O(3)–C(11)–C(19)   | 122.3(3)   | H(4b)–C(4)–H(4C)    | 109.5     |
| N(5)–C(11)–C(19)   | 115.1(2)   | C(3)–C(4)–H(4d)     | 109.5     |
| C(17)–C(12)–C(13)  | 118.6(2)   | H(4b)–C(4)–H(4d)    | 109.5     |
| C(17)–C(12)–C(m2)  | 120.3(2)   | H(4C)–C(4)–H(4d)    | 109.5     |
| C(13)–C(12)–C(m2)  | 121.07(19) | C(3S)–C(2S)–O(2S)   | 101.5(6)  |
| C(12)–C(13)–C(14)  | 120.2(2)   | C(3S)–C(2S)–C(2S)#3 | 46.1(6)   |
| C(12)–C(13)–N(6)   | 118.27(19) | O(2S)–C(2S)–C(2S)#3 | 122.4(10) |
| C(14)–C(13)–N(6)   | 121.5(2)   | C(2S)–C(3S)–C(2S)#3 | 87.8(11)  |
| C(15)–C(14)–C(13)  | 119.6(2)   |                     |           |
| C(15)–C(14)–H(14a) | 120.2      |                     |           |

<sup>a</sup>The estimated standard deviations of the least significant digits are given in parentheses.

**Table S35.** Anisotropic Displacement Parameters ( $\text{\AA}^2$ ) for  $[\text{Co}(\text{TpivPP})(2\text{-MeHIm})0.4(\text{O}_2)] \cdot 2\text{C}_2\text{H}_5\text{OH}^a$   
(100 K,  $C2/c$  form)<sup>a</sup>

| atom  | $U_{11}$   | $U_{22}$   | $U_{33}$   | $U_{23}$    | $U_{13}$    | $U_{12}$    |
|-------|------------|------------|------------|-------------|-------------|-------------|
| Co(1) | 0.0189(2)  | 0.0186(2)  | 0.0127(2)  | 0.000       | 0.0001(1)   | 0.000       |
| N(1)  | 0.0212(8)  | 0.0197(8)  | 0.0163(8)  | -0.0005(6)  | 0.0006(6)   | -0.0010(6)  |
| N(2)  | 0.0224(8)  | 0.0215(8)  | 0.0151(7)  | 0.0000(6)   | 0.0007(6)   | -0.0006(6)  |
| N(5)  | 0.0470(12) | 0.0326(10) | 0.0234(9)  | -0.0066(8)  | 0.0047(8)   | 0.0031(9)   |
| N(6)  | 0.0189(8)  | 0.0367(11) | 0.0505(12) | -0.0171(9)  | -0.0030(8)  | -0.0012(7)  |
| O(1)  | 0.058(4)   | 0.016(3)   | 0.044(3)   | 0.000       | 0.010(3)    | 0.000       |
| O(2)  | 0.053(6)   | 0.028(4)   | 0.058(6)   | -0.007(4)   | -0.009(5)   | -0.007(4)   |
| O(3)  | 0.124(2)   | 0.0603(15) | 0.0548(14) | -0.0324(12) | -0.0232(15) | 0.0379(15)  |
| O(4)  | 0.0277(10) | 0.0670(15) | 0.122(2)   | 0.0533(15)  | 0.0090(12)  | -0.0030(9)  |
| C(A1) | 0.0261(10) | 0.0217(9)  | 0.0160(9)  | -0.0007(7)  | 0.0001(7)   | -0.0007(7)  |
| C(A2) | 0.0237(9)  | 0.0216(9)  | 0.0170(9)  | -0.0012(7)  | -0.0016(7)  | 0.0000(7)   |
| C(A3) | 0.0221(9)  | 0.0235(9)  | 0.0198(9)  | 0.0002(7)   | 0.0003(7)   | -0.0013(7)  |
| C(A4) | 0.0242(10) | 0.0227(9)  | 0.0174(9)  | 0.0003(7)   | 0.0030(7)   | 0.0005(7)   |
| C(B1) | 0.0293(11) | 0.0348(11) | 0.0157(9)  | 0.0007(8)   | -0.0009(8)  | -0.0010(8)  |
| C(B2) | 0.0275(10) | 0.0339(11) | 0.0170(9)  | 0.0000(8)   | -0.0033(8)  | -0.0002(8)  |
| C(B3) | 0.0223(10) | 0.0361(11) | 0.0221(10) | 0.0016(8)   | 0.0021(8)   | -0.0018(8)  |
| C(B4) | 0.0247(10) | 0.0334(11) | 0.0207(10) | 0.0012(8)   | 0.0042(8)   | -0.0018(8)  |
| C(M1) | 0.0264(10) | 0.0207(9)  | 0.0150(9)  | 0.0002(7)   | 0.0024(7)   | -0.0004(7)  |
| C(M2) | 0.0212(9)  | 0.0217(9)  | 0.0203(9)  | -0.0005(7)  | -0.0022(7)  | -0.0007(7)  |
| C(5)  | 0.0216(9)  | 0.0347(11) | 0.0155(9)  | 0.0036(8)   | 0.0014(7)   | 0.0000(8)   |
| C(6)  | 0.0284(10) | 0.0419(12) | 0.0168(9)  | -0.0013(8)  | 0.0019(8)   | 0.0025(9)   |
| C(7)  | 0.0324(12) | 0.0754(19) | 0.0170(10) | -0.0043(11) | 0.0026(9)   | 0.0122(12)  |
| C(8)  | 0.0259(11) | 0.095(2)   | 0.0182(11) | 0.0162(12)  | 0.0040(9)   | 0.0102(12)  |
| C(9)  | 0.0260(11) | 0.0699(18) | 0.0337(13) | 0.0298(13)  | 0.0015(9)   | 0.0003(11)  |
| C(10) | 0.0284(11) | 0.0407(13) | 0.0288(11) | 0.0117(9)   | 0.0007(8)   | 0.0003(9)   |
| C(11) | 0.0375(13) | 0.0399(13) | 0.0487(15) | -0.0164(11) | -0.0142(11) | 0.0125(11)  |
| C(12) | 0.0215(10) | 0.0361(11) | 0.0182(9)  | 0.0022(8)   | -0.0006(7)  | 0.0002(8)   |
| C(13) | 0.0219(10) | 0.0397(12) | 0.0242(10) | -0.0046(9)  | -0.0025(8)  | -0.0008(9)  |
| C(14) | 0.0264(11) | 0.0532(15) | 0.0340(12) | -0.0009(11) | -0.0087(9)  | -0.0053(10) |
| C(15) | 0.0256(12) | 0.0623(17) | 0.0477(15) | 0.0220(13)  | -0.0127(10) | -0.0024(11) |
| C(16) | 0.0328(13) | 0.0463(15) | 0.0648(18) | 0.0228(14)  | -0.0064(12) | 0.0068(11)  |
| C(17) | 0.0312(12) | 0.0352(12) | 0.0430(13) | 0.0111(10)  | -0.0026(10) | 0.0014(9)   |
| C(18) | 0.0256(11) | 0.0473(14) | 0.0248(10) | -0.0003(9)  | 0.0035(8)   | -0.0002(9)  |
| C(19) | 0.0297(12) | 0.0290(12) | 0.075(2)   | -0.0019(12) | -0.0152(12) | 0.0011(9)   |

**Table S35.** Continued

| atom  | $U_{11}$   | $U_{22}$   | $U_{33}$   | $U_{23}$    | $U_{13}$    | $U_{12}$    |
|-------|------------|------------|------------|-------------|-------------|-------------|
| C(20) | 0.0305(12) | 0.0397(14) | 0.0666(18) | -0.0042(13) | -0.0142(12) | 0.0032(10)  |
| C(21) | 0.0469(18) | 0.0423(17) | 0.164(4)   | 0.005(2)    | -0.057(2)   | -0.0047(14) |
| C(22) | 0.0605(19) | 0.0417(15) | 0.070(2)   | 0.0213(15)  | 0.0183(16)  | 0.0068(14)  |
| C(23) | 0.0321(12) | 0.0410(13) | 0.0417(13) | -0.0097(11) | 0.0076(10)  | 0.0032(10)  |
| C(24) | 0.077(2)   | 0.066(2)   | 0.069(2)   | -0.0314(19) | 0.0100(19)  | 0.0035(19)  |
| C(25) | 0.0514(17) | 0.0589(19) | 0.0549(18) | 0.0152(14)  | 0.0067(14)  | 0.0185(14)  |
| C(26) | 0.0302(14) | 0.063(2)   | 0.075(2)   | 0.0114(16)  | 0.0087(14)  | 0.0125(12)  |
| O(1S) | 0.042(2)   | 0.0317(18) | 0.069(3)   | 0.0082(17)  | 0.0283(19)  | 0.0038(15)  |
| C(1S) | 0.130(4)   | 0.055(2)   | 0.112(4)   | 0.019(2)    | 0.080(3)    | 0.029(2)    |
| N(3)  | 0.017(5)   | 0.0284(15) | 0.017(5)   | -0.0019(17) | 0.000(3)    | 0.0016(16)  |
| C(1)  | 0.019(2)   | 0.036(3)   | 0.017(2)   | -0.001(2)   | 0.0061(19)  | -0.002(2)   |
| C(2)  | 0.0228(19) | 0.032(2)   | 0.0211(19) | 0.0032(16)  | 0.0003(15)  | -0.0011(16) |
| N(4)  | 0.0235(12) | 0.0240(12) | 0.0260(12) | 0.000       | 0.0010(9)   | 0.000       |
| C(3)  | 0.0180(18) | 0.028(2)   | 0.0196(19) | -0.0015(18) | -0.0021(16) | 0.0031(18)  |
| C(4)  | 0.030(3)   | 0.022(2)   | 0.037(3)   | 0.0034(19)  | 0.015(2)    | 0.0044(18)  |
| O(2S) | 0.136(5)   | 0.054(3)   | 0.058(3)   | -0.004(2)   | -0.012(3)   | -0.013(3)   |
| C(2S) | 0.117(7)   | 0.052(4)   | 0.039(3)   | 0.000(3)    | -0.024(4)   | 0.018(4)    |
| C(3S) | 0.084(6)   | 0.164(10)  | 0.211(13)  | 0.000       | 0.030(7)    | 0.000       |

<sup>a</sup>The estimated standard deviations of the least significant digits are given in parentheses.

The anisotropic displacement factor exponent takes the form:  $-2 \pi [\text{h}^2 U_{11} + \dots + 2 \text{h k a}^* \text{ b}^* U_{12}]$ .



**Table S36.** Hydrogen Atom Coordinates and Equivalent Isotropic Displacement Parameters ( $\text{\AA}^2$ ) for  $[\text{Co}(\text{TpivPP})(2\text{-MeHIm})0.4(\text{O}_2)] \cdot 2\text{C}_2\text{H}_5\text{OH}^a$  (100 K,  $C2/c$  form)

| atom   | $x$    | $y$    | $z$    | $U(\text{eq})$ |
|--------|--------|--------|--------|----------------|
| H(5A)  | 0.6045 | 0.7501 | 0.5479 | 0.041          |
| H(6A)  | 0.3168 | 0.7375 | 0.6145 | 0.042          |
| H(BA)  | 0.4554 | 0.8702 | 0.4668 | 0.032          |
| H(BB)  | 0.3334 | 0.8655 | 0.5199 | 0.031          |
| H(BC)  | 0.2297 | 0.8433 | 0.7916 | 0.032          |
| H(BD)  | 0.2823 | 0.8485 | 0.9203 | 0.031          |
| H(7A)  | 0.6547 | 0.7670 | 0.3597 | 0.050          |
| H(8A)  | 0.6614 | 0.8709 | 0.2983 | 0.056          |
| H(9A)  | 0.6297 | 0.9715 | 0.3580 | 0.052          |
| H(10A) | 0.5902 | 0.9682 | 0.4819 | 0.039          |
| H(14A) | 0.1394 | 0.7478 | 0.5650 | 0.046          |
| H(15A) | 0.0692 | 0.8460 | 0.5639 | 0.054          |
| H(16A) | 0.1138 | 0.9473 | 0.6129 | 0.058          |
| H(17A) | 0.2312 | 0.9523 | 0.6598 | 0.044          |
| H(20A) | 0.6980 | 0.5760 | 0.5027 | 0.069          |
| H(20B) | 0.6821 | 0.5588 | 0.5886 | 0.069          |
| H(20C) | 0.7174 | 0.6306 | 0.5668 | 0.069          |
| H(21A) | 0.5680 | 0.5520 | 0.4701 | 0.128          |
| H(21B) | 0.5060 | 0.5917 | 0.5136 | 0.128          |
| H(21C) | 0.5535 | 0.5352 | 0.5564 | 0.128          |
| H(22A) | 0.6196 | 0.6919 | 0.6333 | 0.086          |
| H(22B) | 0.5846 | 0.6201 | 0.6556 | 0.086          |
| H(22C) | 0.5371 | 0.6764 | 0.6124 | 0.086          |
| H(24A) | 0.2394 | 0.5450 | 0.5843 | 0.106          |
| H(24B) | 0.3224 | 0.5231 | 0.5849 | 0.106          |
| H(24C) | 0.2952 | 0.5847 | 0.5325 | 0.106          |
| H(25A) | 0.2430 | 0.5617 | 0.7212 | 0.083          |
| H(25B) | 0.3008 | 0.6122 | 0.7593 | 0.083          |
| H(25C) | 0.3263 | 0.5406 | 0.7254 | 0.083          |
| H(26A) | 0.3909 | 0.6711 | 0.6801 | 0.084          |
| H(26B) | 0.3875 | 0.6614 | 0.5909 | 0.084          |
| H(26C) | 0.4149 | 0.6000 | 0.6436 | 0.084          |
| H(1A)  | 0.5888 | 0.9800 | 0.6618 | 0.029          |
| H(2A)  | 0.5771 | 1.1046 | 0.6714 | 0.031          |

**Table S36.** Continued

| atom  | <i>x</i> | <i>y</i> | <i>z</i> | <i>U</i> (eq) |
|-------|----------|----------|----------|---------------|
| H(4A) | 0.4852   | 1.1233   | 0.7647   | 0.029         |
| H(4B) | 0.4089   | 0.9692   | 0.8426   | 0.044         |
| H(4C) | 0.3749   | 1.0396   | 0.8129   | 0.044         |
| H(4D) | 0.4351   | 1.0403   | 0.8782   | 0.044         |

## Supporting Information

**Table S37.** Complete Crystallographic Details for [Co(TpivPP)(2-MeHIm)<sub>0.3</sub>(O<sub>2</sub>)]·1.8C<sub>2</sub>H<sub>5</sub>OH (300 K, C2/c form)

|                                                              |                                                                        |
|--------------------------------------------------------------|------------------------------------------------------------------------|
| formula                                                      | C <sub>71.6</sub> H <sub>80.8</sub> CoN <sub>10</sub> O <sub>6.4</sub> |
| FW, amu                                                      | 1242.79                                                                |
| <i>a</i> , Å                                                 | 18.9063(5)                                                             |
| <i>b</i> , Å                                                 | 19.6633(5)                                                             |
| <i>c</i> , Å                                                 | 18.3473(5)                                                             |
| $\beta$ , deg                                                | 91.6660(10)                                                            |
| <i>V</i> , Å <sup>3</sup>                                    | 6817.9(3)                                                              |
| space group                                                  | C2/c                                                                   |
| <i>Z</i>                                                     | 4                                                                      |
| D <sub>c</sub> , g/cm <sup>3</sup>                           | 1.211                                                                  |
| F(000)                                                       | 2634                                                                   |
| $\mu$ , mm <sup>-1</sup>                                     | 0.310                                                                  |
| crystal dimensions, mm                                       | 0.37 × 0.21 × 0.16                                                     |
| radiation                                                    | MoK $\alpha$ , $\bar{\lambda}$ = 0.71073 Å                             |
| temperature, K                                               | 300(2)                                                                 |
| diffractometer                                               | Bruker Apex CCD                                                        |
| $\theta$ range for collected data, deg                       | 1.49–30.65                                                             |
| index range                                                  | –26 ≤ <i>h</i> ≤ 26<br>–28 ≤ <i>k</i> ≤ 28<br>–26 ≤ <i>l</i> ≤ 26      |
| total data collected                                         | 59647                                                                  |
| absorption correction                                        | Semi-empirical from equiv                                              |
| relative transmission coefficients (I)                       | 0.9520 and 0.8939                                                      |
| unique data                                                  | 10430 ( <i>R</i> <sub>int</sub> = 0.044)                               |
| unique observed data [ <i>I</i> > 2 $\sigma$ ( <i>I</i> )]   | 6200                                                                   |
| refinement method                                            | Full-matrix least-squares on F <sup>2</sup>                            |
| data/restraints/parameters                                   | 10430/39/456                                                           |
| goodness-of-fit (based on <i>F</i> <sup>2</sup> )            | 1.024                                                                  |
| final <i>R</i> indices [ <i>I</i> > 2 $\sigma$ ( <i>I</i> )] | <i>R</i> <sub>1</sub> = 0.0758, <i>wR</i> <sub>2</sub> = 0.2301        |
| final <i>R</i> indices (all data)                            | <i>R</i> <sub>1</sub> = 0.1219, <i>wR</i> <sub>2</sub> = 0.2646        |

**Table S38.** Atomic Coordinates and Equivalent Isotropic Displacement Parameters ( $\text{\AA}^2$ ) for  $[\text{Co}(\text{TpivPP})(2\text{-MeHIm})0.3(\text{O}_2)] \cdot 1.8\text{C}_2\text{H}_5\text{OH}^a$  (300 K,  $C2/c$  form)<sup>a</sup>

| atom  | <i>x</i>    | <i>y</i>    | <i>z</i>    | <i>U</i> (eq) |
|-------|-------------|-------------|-------------|---------------|
| Co(1) | 0.5000      | 0.86465(2)  | 0.7500      | 0.0455(2)     |
| O(1)  | 0.5000      | 0.7633(5)   | 0.7500      | 0.062(2)      |
| O(2)  | 0.523(2)    | 0.7254(10)  | 0.7760(14)  | 0.206(19)     |
| N(3)  | 0.45761(12) | 0.86017(10) | 0.64970(11) | 0.0464(4)     |
| N(4)  | 0.40456(12) | 0.85608(10) | 0.79113(11) | 0.0491(5)     |
| N(5)  | 0.6105(2)   | 0.74871(17) | 0.49836(16) | 0.0963(11)    |
| N(6)  | 0.26761(15) | 0.73281(16) | 0.6269(2)   | 0.0873(9)     |
| O(3)  | 0.6261(4)   | 0.6726(3)   | 0.4110(3)   | 0.234(4)      |
| O(4)  | 0.1830(2)   | 0.6566(2)   | 0.6385(4)   | 0.197(3)      |
| C(a1) | 0.49237(15) | 0.86294(13) | 0.58508(13) | 0.0512(6)     |
| C(a2) | 0.38710(14) | 0.85849(12) | 0.63055(13) | 0.0500(6)     |
| C(a3) | 0.34044(14) | 0.85256(14) | 0.75358(15) | 0.0537(6)     |
| C(a4) | 0.38704(15) | 0.85648(14) | 0.86366(14) | 0.0538(6)     |
| C(b1) | 0.44263(17) | 0.86370(17) | 0.52447(15) | 0.0643(7)     |
| C(b2) | 0.37750(17) | 0.86118(16) | 0.55256(15) | 0.0638(7)     |
| C(b3) | 0.28302(16) | 0.84872(19) | 0.80324(17) | 0.0682(8)     |
| C(b4) | 0.31178(16) | 0.85203(19) | 0.87062(17) | 0.0705(8)     |
| C(m1) | 0.56523(15) | 0.86246(13) | 0.57737(14) | 0.0538(6)     |
| C(m2) | 0.33149(15) | 0.85472(13) | 0.67810(15) | 0.0537(6)     |
| C(5)  | 0.59352(15) | 0.86935(16) | 0.50226(14) | 0.0593(7)     |
| C(6)  | 0.61467(18) | 0.81258(19) | 0.46302(15) | 0.0717(8)     |
| C(7)  | 0.6393(2)   | 0.8202(3)   | 0.39303(18) | 0.0932(13)    |
| C(8)  | 0.6421(2)   | 0.8853(3)   | 0.3624(2)   | 0.1037(15)    |
| C(9)  | 0.6211(2)   | 0.9393(3)   | 0.3993(2)   | 0.0978(14)    |
| C(10) | 0.5965(2)   | 0.9329(2)   | 0.4695(2)   | 0.0811(10)    |
| C(11) | 0.25712(15) | 0.85243(16) | 0.64644(16) | 0.0604(7)     |
| C(12) | 0.22671(16) | 0.79246(19) | 0.62260(18) | 0.0719(8)     |
| C(13) | 0.1573(2)   | 0.7929(3)   | 0.5941(2)   | 0.0951(12)    |
| C(14) | 0.1192(2)   | 0.8520(3)   | 0.5915(3)   | 0.1096(16)    |
| C(15) | 0.1490(2)   | 0.9105(3)   | 0.6152(3)   | 0.1059(15)    |
| C(16) | 0.21699(19) | 0.9117(2)   | 0.6422(2)   | 0.0822(10)    |
| C(17) | 0.6152(3)   | 0.6857(3)   | 0.4766(3)   | 0.1161(16)    |
| C(18) | 0.2461(2)   | 0.6700(2)   | 0.6378(2)   | 0.0892(11)    |
| C(19) | 0.6104(3)   | 0.6304(2)   | 0.5308(3)   | 0.1000(13)    |

**Table S38.** Continued

| atom   | <i>x</i>    | <i>y</i>   | <i>z</i>   | <i>U</i> (eq) |
|--------|-------------|------------|------------|---------------|
| C(20)  | 0.6815(3)   | 0.6038(4)  | 0.5475(5)  | 0.187(4)      |
| C(21)  | 0.5619(5)   | 0.5729(4)  | 0.5019(6)  | 0.218(4)      |
| C(22)  | 0.5813(7)   | 0.6517(4)  | 0.6018(6)  | 0.243(6)      |
| C(23)  | 0.3017(3)   | 0.6143(2)  | 0.6484(3)  | 0.0961(12)    |
| C(24)  | 0.2859(6)   | 0.5652(5)  | 0.5849(6)  | 0.242(5)      |
| C(25)  | 0.2902(4)   | 0.5780(5)  | 0.7150(5)  | 0.232(6)      |
| C(26)  | 0.3733(4)   | 0.6354(4)  | 0.6390(8)  | 0.273(8)      |
| N(2)   | 0.5000      | 1.0840(2)  | 0.7500     | 0.0751(10)    |
| N(1)   | 0.4892(6)   | 0.9733(3)  | 0.7584(7)  | 0.0554(19)    |
| C(1)   | 0.5233(4)   | 1.0238(3)  | 0.7275(4)  | 0.0598(13)    |
| C(3)   | 0.4416(5)   | 1.0050(4)  | 0.8050(5)  | 0.0677(19)    |
| C(2)   | 0.4481(4)   | 1.0710(4)  | 0.8020(4)  | 0.0758(17)    |
| C(4)   | 0.5776(6)   | 1.0200(5)  | 0.6711(7)  | 0.096(3)      |
| O(1S)  | 0.4464(6)   | 0.2033(5)  | 0.7974(7)  | 0.187(5)      |
| C(1S)  | 0.4725(5)   | 0.2633(4)  | 0.7731(6)  | 0.211(4)      |
| C(2S)  | 0.0000      | 1.0039(13) | 0.7500     | 0.268(10)     |
| C(3S)  | -0.0319(15) | 0.9432(11) | 0.7265(14) | 0.225(10)     |
| O(2Sb) | -0.0960(15) | 0.9452(17) | 0.6914(18) | 0.201(9)      |
| O(2Sa) | -0.0373(19) | 0.9613(16) | 0.6554(14) | 0.201(9)      |

<sup>a</sup>*U*(eq) is defined as one third of the trace of the orthogonalized  $\mathbf{U}_{ij}$  tensor.

The estimated standard deviations of the least significant digits are given in parentheses.

**Table S39.** Bond Lengths for [Co(TpivPP)(2-MeHIm)0.3(O<sub>2</sub>)]·1.8C<sub>2</sub>H<sub>5</sub>OH<sup>a</sup> (300 K, *C2/c* form)<sup>a</sup>

| bond          | length (Å) | bond         | length (Å) |
|---------------|------------|--------------|------------|
| Co(1)–N(4)    | 1.983(2)   | C(14)–C(15)  | 1.348(7)   |
| Co(1)–N(4)#1  | 1.983(2)   | C(14)–H(14a) | 0.9300     |
| Co(1)–N(3)#1  | 1.988(2)   | C(15)–C(16)  | 1.364(6)   |
| Co(1)–N(3)    | 1.988(2)   | C(15)–H(15a) | 0.9300     |
| Co(1)–O(1)    | 1.993(9)   | C(16)–H(16a) | 0.9300     |
| Co(1)–N(1)    | 2.153(5)   | C(17)–C(19)  | 1.477(7)   |
| Co(1)–N(1)#1  | 2.153(5)   | C(18)–C(23)  | 1.527(6)   |
| O(1)–O(2)     | 0.98(2)    | C(19)–C(20)  | 1.466(7)   |
| O(1)–O(2)#1   | 0.98(2)    | C(19)–C(22)  | 1.489(10)  |
| O(2)–O(2)#1   | 1.28(5)    | C(19)–C(21)  | 1.539(8)   |
| N(3)–C(a2)    | 1.369(3)   | C(20)–H(20a) | 0.9600     |
| N(3)–C(a1)    | 1.373(3)   | C(20)–H(20b) | 0.9600     |
| N(4)–C(a3)    | 1.379(3)   | C(20)–H(20C) | 0.9600     |
| N(4)–C(a4)    | 1.381(3)   | C(21)–H(21a) | 0.9600     |
| N(5)–C(17)    | 1.306(6)   | C(21)–H(21b) | 0.9600     |
| N(5)–C(6)     | 1.417(5)   | C(21)–H(21C) | 0.9600     |
| N(5)–H(5a)    | 0.8600     | C(22)–H(22a) | 0.9600     |
| N(6)–C(18)    | 1.317(5)   | C(22)–H(22b) | 0.9600     |
| N(6)–C(12)    | 1.406(5)   | C(22)–H(22C) | 0.9600     |
| N(6)–H(6a)    | 0.8600     | C(23)–C(26)  | 1.431(8)   |
| O(3)–C(17)    | 1.253(6)   | C(23)–C(25)  | 1.437(8)   |
| O(4)–C(18)    | 1.221(5)   | C(23)–C(24)  | 1.536(10)  |
| C(a1)–C(m1)   | 1.389(4)   | C(24)–H(24a) | 0.9600     |
| C(a1)–C(b1)   | 1.435(4)   | C(24)–H(24b) | 0.9600     |
| C(a2)–C(m2)   | 1.388(4)   | C(24)–H(24C) | 0.9600     |
| C(a2)–C(b2)   | 1.438(4)   | C(25)–H(25a) | 0.9600     |
| C(a3)–C(m2)   | 1.391(4)   | C(25)–H(25b) | 0.9600     |
| C(a3)–C(b3)   | 1.439(4)   | C(25)–H(25C) | 0.9600     |
| C(a4)–C(m1#1) | 1.394(4)   | C(26)–H(26a) | 0.9600     |
| C(a4)–C(b4)   | 1.435(4)   | C(26)–H(26b) | 0.9600     |
| C(b1)–C(b2)   | 1.350(4)   | C(26)–H(26C) | 0.9600     |
| C(b1)–H(ba)   | 0.9300     | N(2)–C(1)#1  | 1.332(8)   |
| C(b2)–H(bb)   | 0.9300     | N(2)–C(1)    | 1.332(8)   |
| C(b3)–C(b4)   | 1.337(4)   | N(2)–C(2)#1  | 1.412(8)   |

**Table S39.** Continued

| bond          | length (Å) | bond           | length (Å) |
|---------------|------------|----------------|------------|
| C(b3)–H(bC)   | 0.9300     | N(2)–C(2)      | 1.412(8)   |
| C(b4)–H(bd)   | 0.9300     | N(2)–H(2a)     | 0.8600     |
| C(m1)–C(a4#1) | 1.394(4)   | N(1)–C(1)      | 1.319(8)   |
| C(m1)–C(5)    | 1.499(4)   | N(1)–C(3)      | 1.405(11)  |
| C(m2)–C(11)   | 1.506(4)   | C(1)–C(4)      | 1.481(11)  |
| C(5)–C(10)    | 1.388(5)   | C(3)–C(2)      | 1.304(12)  |
| C(5)–C(6)     | 1.393(5)   | C(3)–H(3a)     | 0.9300     |
| C(6)–C(7)     | 1.387(4)   | C(2)–H(2b)     | 0.9300     |
| C(7)–C(8)     | 1.400(7)   | C(4)–H(4a)     | 0.9600     |
| C(7)–H(7a)    | 0.9300     | C(4)–H(4b)     | 0.9600     |
| C(8)–C(9)     | 1.326(7)   | C(4)–H(4C)     | 0.9600     |
| C(8)–H(8a)    | 0.9300     | O(1S)–C(1S)    | 1.358(11)  |
| C(9)–C(10)    | 1.389(5)   | C(1S)–C(1S)#1) | 1.360(14)  |
| C(9)–H(9a)    | 0.9300     | C(2S)–C(3S)#2) | 1.400(17)  |
| C(10)–H(10a)  | 0.9300     | C(2S)–C(3S)    | 1.400(17)  |
| C(11)–C(12)   | 1.378(5)   | C(3S)–O(2Sa)   | 1.353(18)  |
| C(11)–C(16)   | 1.392(5)   | C(3S)–O(2Sb)   | 1.356(18)  |
| C(12)–C(13)   | 1.398(5)   | C(3S)–C(3S)#2) | 1.46(5)    |
| C(13)–C(14)   | 1.366(7)   |                |            |
| C(13)–H(13a)  | 0.9300     |                |            |

<sup>a</sup>The estimated standard deviations of the least significant digits are given in parentheses.

**Table S40.** Bond Angles for [Co(TpivPP)(2-MeHIm)0.3(O<sub>2</sub>)]·1.8C<sub>2</sub>H<sub>5</sub>OH<sup>a</sup> (300 K, *C*2/*c* form)<sup>a</sup>

| angle               | degree     | angle               | degree   |
|---------------------|------------|---------------------|----------|
| N(4)–Co(1)–N(4)#1   | 170.26(12) | C(14)–C(15)–C(16)   | 120.8(4) |
| N(4)–Co(1)–N(3)#1   | 89.47(9)   | C(14)–C(15)–H(15a)  | 119.6    |
| N(4)#1–Co(1)–N(3)#1 | 90.10(9)   | C(16)–C(15)–H(15a)  | 119.6    |
| N(4)–Co(1)–N(3)     | 90.10(9)   | C(15)–C(16)–C(11)   | 120.8(4) |
| N(4)#1–Co(1)–N(3)   | 89.47(9)   | C(15)–C(16)–H(16a)  | 119.6    |
| N(3)#1–Co(1)–N(3)   | 174.92(12) | C(11)–C(16)–H(16a)  | 119.6    |
| N(4)–Co(1)–O(1)     | 85.13(6)   | O(3)–C(17)–N(5)     | 120.2(5) |
| N(4)#1–Co(1)–O(1)   | 85.13(6)   | O(3)–C(17)–C(19)    | 120.6(5) |
| N(3)#1–Co(1)–O(1)   | 87.46(6)   | N(5)–C(17)–C(19)    | 119.1(4) |
| N(3)–Co(1)–O(1)     | 87.46(6)   | O(4)–C(18)–N(6)     | 120.7(4) |
| N(4)–Co(1)–N(1)     | 88.2(2)    | O(4)–C(18)–C(23)    | 120.8(4) |
| N(4)#1–Co(1)–N(1)   | 101.6(2)   | N(6)–C(18)–C(23)    | 118.5(4) |
| N(3)#1–Co(1)–N(1)   | 90.8(4)    | C(20)–C(19)–C(17)   | 109.2(5) |
| N(3)–Co(1)–N(1)     | 94.2(4)    | C(20)–C(19)–C(22)   | 106.1(7) |
| O(1)–Co(1)–N(1)     | 173.10(16) | C(17)–C(19)–C(22)   | 114.4(4) |
| N(4)–Co(1)–N(1)#1   | 101.6(2)   | C(20)–C(19)–C(21)   | 110.1(6) |
| N(4)#1–Co(1)–N(1)#1 | 88.2(2)    | C(17)–C(19)–C(21)   | 110.9(5) |
| N(3)#1–Co(1)–N(1)#1 | 94.2(4)    | C(22)–C(19)–C(21)   | 106.0(7) |
| N(3)–Co(1)–N(1)#1   | 90.8(4)    | C(19)–C(20)–H(20a)  | 109.5    |
| O(1)–Co(1)–N(1)#1   | 173.10(16) | C(19)–C(20)–H(20b)  | 109.5    |
| N(1)–Co(1)–N(1)#1   | 13.8(3)    | H(20a)–C(20)–H(20b) | 109.5    |
| O(2)–O(1)–O(2)#1    | 81(3)      | C(19)–C(20)–H(20C)  | 109.5    |
| O(2)–O(1)–Co(1)     | 139.3(16)  | H(20a)–C(20)–H(20C) | 109.5    |
| O(2)#1–O(1)–Co(1)   | 139.3(16)  | H(20b)–C(20)–H(20C) | 109.5    |
| O(1)–O(2)–O(2)#1    | 49.3(16)   | C(19)–C(21)–H(21a)  | 109.5    |
| C(a2)–N(3)–C(a1)    | 105.4(2)   | C(19)–C(21)–H(21b)  | 109.5    |
| C(a2)–N(3)–Co(1)    | 127.02(18) | H(21a)–C(21)–H(21b) | 109.5    |
| C(a1)–N(3)–Co(1)    | 127.40(18) | C(19)–C(21)–H(21C)  | 109.5    |
| C(a3)–N(4)–C(a4)    | 104.5(2)   | H(21a)–C(21)–H(21C) | 109.5    |
| C(a3)–N(4)–Co(1)    | 127.64(18) | H(21b)–C(21)–H(21C) | 109.5    |
| C(a4)–N(4)–Co(1)    | 127.78(18) | C(19)–C(22)–H(22a)  | 109.5    |
| C(17)–N(5)–C(6)     | 134.1(3)   | C(19)–C(22)–H(22b)  | 109.5    |
| C(17)–N(5)–H(5a)    | 112.9      | H(22a)–C(22)–H(22b) | 109.5    |
| C(6)–N(5)–H(5a)     | 112.9      | C(19)–C(22)–H(22C)  | 109.5    |



**Table S40.** Continued

| angle               | degree   | angle               | degree   |
|---------------------|----------|---------------------|----------|
| C(18)–N(6)–C(12)    | 128.2(3) | H(22a)–C(22)–H(22C) | 109.5    |
| C(18)–N(6)–H(6a)    | 115.9    | H(22b)–C(22)–H(22C) | 109.5    |
| C(12)–N(6)–H(6a)    | 115.9    | C(26)–C(23)–C(25)   | 114.4(7) |
| N(3)–C(a1)–C(m1)    | 126.1(2) | C(26)–C(23)–C(18)   | 115.3(4) |
| N(3)–C(a1)–C(b1)    | 110.5(2) | C(25)–C(23)–C(18)   | 110.2(4) |
| C(m1)–C(a1)–C(b1)   | 123.4(3) | C(26)–C(23)–C(24)   | 104.7(8) |
| N(3)–C(a2)–C(m2)    | 126.1(2) | C(25)–C(23)–C(24)   | 107.5(8) |
| N(3)–C(a2)–C(b2)    | 110.4(2) | C(18)–C(23)–C(24)   | 103.7(5) |
| C(m2)–C(a2)–C(b2)   | 123.5(3) | C(23)–C(24)–H(24a)  | 109.5    |
| N(4)–C(a3)–C(m2)    | 125.2(2) | C(23)–C(24)–H(24b)  | 109.5    |
| N(4)–C(a3)–C(b3)    | 110.8(2) | H(24a)–C(24)–H(24b) | 109.5    |
| C(m2)–C(a3)–C(b3)   | 124.0(3) | C(23)–C(24)–H(24C)  | 109.5    |
| N(4)–C(a4)–C(m1#1)  | 125.5(3) | H(24a)–C(24)–H(24C) | 109.5    |
| N(4)–C(a4)–C(b4)    | 110.6(2) | H(24b)–C(24)–H(24C) | 109.5    |
| C(m1#1)–C(a4)–C(b4) | 123.9(3) | C(23)–C(25)–H(25a)  | 109.5    |
| C(b2)–C(b1)–C(a1)   | 106.8(2) | C(23)–C(25)–H(25b)  | 109.5    |
| C(b2)–C(b1)–H(ba)   | 126.6    | H(25a)–C(25)–H(25b) | 109.5    |
| C(a1)–C(b1)–H(ba)   | 126.6    | C(23)–C(25)–H(25C)  | 109.5    |
| C(b1)–C(b2)–C(a2)   | 106.9(2) | H(25a)–C(25)–H(25C) | 109.5    |
| C(b1)–C(b2)–H(bb)   | 126.5    | H(25b)–C(25)–H(25C) | 109.5    |
| C(a2)–C(b2)–H(bb)   | 126.5    | C(23)–C(26)–H(26a)  | 109.5    |
| C(b4)–C(b3)–C(a3)   | 106.8(3) | C(23)–C(26)–H(26b)  | 109.5    |
| C(b4)–C(b3)–H(bC)   | 126.6    | H(26a)–C(26)–H(26b) | 109.5    |
| C(a3)–C(b3)–H(bC)   | 126.6    | C(23)–C(26)–H(26C)  | 109.5    |
| C(b3)–C(b4)–C(a4)   | 107.3(3) | H(26a)–C(26)–H(26C) | 109.5    |
| C(b3)–C(b4)–H(bd)   | 126.3    | H(26b)–C(26)–H(26C) | 109.5    |
| C(a4)–C(b4)–H(bd)   | 126.3    | C(1)#1–N(2)–C(1)    | 54.7(7)  |
| C(a1)–C(m1)–C(a4#1) | 122.9(2) | C(1)#1–N(2)–C(2)#1  | 106.9(5) |
| C(a1)–C(m1)–C(5)    | 118.3(2) | C(1)–N(2)–C(2)#1    | 52.2(4)  |
| C(a4#1)–C(m1)–C(5)  | 118.8(3) | C(1)#1–N(2)–C(2)    | 52.2(4)  |
| C(a2)–C(m2)–C(a3)   | 123.7(3) | C(1)–N(2)–C(2)      | 106.9(5) |
| C(a2)–C(m2)–C(11)   | 118.4(2) | C(2)#1–N(2)–C(2)    | 159.1(7) |
| C(a3)–C(m2)–C(11)   | 117.9(3) | C(1)#1–N(2)–H(2a)   | 178.5    |
| C(10)–C(5)–C(6)     | 118.8(3) | C(1)–N(2)–H(2a)     | 126.6    |

**Table S40.** Continued

| angle              | degree   | angle                | degree   |
|--------------------|----------|----------------------|----------|
| C(10)–C(5)–C(m1)   | 120.0(3) | C(2)#1–N(2)–H(2a)    | 74.3     |
| C(6)–C(5)–C(m1)    | 121.2(3) | C(2)–N(2)–H(2a)      | 126.6    |
| C(7)–C(6)–C(5)     | 120.1(4) | C(1)–N(1)–C(3)       | 104.9(6) |
| C(7)–C(6)–N(5)     | 123.0(4) | C(1)–N(1)–Co(1)      | 131.9(5) |
| C(5)–C(6)–N(5)     | 117.0(3) | C(3)–N(1)–Co(1)      | 123.1(5) |
| C(6)–C(7)–C(8)     | 119.2(4) | N(1)–C(1)–N(2)       | 111.4(7) |
| C(6)–C(7)–H(7a)    | 120.4    | N(1)–C(1)–C(4)       | 128.3(7) |
| C(8)–C(7)–H(7a)    | 120.4    | N(2)–C(1)–C(4)       | 120.2(6) |
| C(9)–C(8)–C(7)     | 120.8(3) | C(2)–C(3)–N(1)       | 110.6(8) |
| C(9)–C(8)–H(8a)    | 119.6    | C(2)–C(3)–H(3a)      | 124.7    |
| C(7)–C(8)–H(8a)    | 119.6    | N(1)–C(3)–H(3a)      | 124.7    |
| C(8)–C(9)–C(10)    | 120.9(4) | C(3)–C(2)–N(2)       | 106.1(7) |
| C(8)–C(9)–H(9a)    | 119.5    | C(3)–C(2)–H(2b)      | 127.0    |
| C(10)–C(9)–H(9a)   | 119.5    | N(2)–C(2)–H(2b)      | 127.0    |
| C(5)–C(10)–C(9)    | 120.2(4) | C(1)–C(4)–H(4a)      | 109.5    |
| C(5)–C(10)–H(10a)  | 119.9    | C(1)–C(4)–H(4b)      | 109.5    |
| C(9)–C(10)–H(10a)  | 119.9    | H(4a)–C(4)–H(4b)     | 109.5    |
| C(12)–C(11)–C(16)  | 118.5(3) | C(1)–C(4)–H(4C)      | 109.5    |
| C(12)–C(11)–C(m2)  | 121.6(3) | H(4a)–C(4)–H(4C)     | 109.5    |
| C(16)–C(11)–C(m2)  | 119.8(3) | H(4b)–C(4)–H(4C)     | 109.5    |
| C(11)–C(12)–C(13)  | 119.5(4) | O(1S)–C(1S)–C(1S)#1  | 119.8(5) |
| C(11)–C(12)–N(6)   | 118.2(3) | C(3S)#2–C(2S)–C(3S)  | 63(2)    |
| C(13)–C(12)–N(6)   | 122.3(3) | O(2Sa)–C(3S)–O(2Sb)  | 60(2)    |
| C(14)–C(13)–C(12)  | 120.4(4) | O(2Sa)–C(3S)–C(2S)   | 95.3(19) |
| C(14)–C(13)–H(13a) | 119.8    | O(2Sb)–C(3S)–C(2S)   | 119(2)   |
| C(12)–C(13)–H(13a) | 119.8    | O(2Sa)–C(3S)–C(3S)#2 | 127(4)   |
| C(15)–C(14)–C(13)  | 120.0(4) | O(2Sb)–C(3S)–C(3S)#2 | 172(4)   |
| C(15)–C(14)–H(14a) | 120.0    | C(2S)–C(3S)–C(3S)#2  | 58.5(12) |
| C(13)–C(14)–H(14a) | 120.0    |                      |          |

<sup>a</sup>The estimated standard deviations of the least significant digits are given in parentheses.

**Table S41.** Anisotropic Displacement Parameters ( $\text{\AA}^2$ ) for  $[\text{Co}(\text{TpivPP})(2\text{-MeHIm})0.3(\text{O}_2)] \cdot 1.8\text{C}_2\text{H}_5\text{OH}^a$   
(300 K,  $C2/c$  form)<sup>a</sup>

| atom  | $U_{11}$   | $U_{22}$   | $U_{33}$   | $U_{23}$    | $U_{13}$    | $U_{12}$    |
|-------|------------|------------|------------|-------------|-------------|-------------|
| Co(1) | 0.0439(3)  | 0.0519(3)  | 0.0405(2)  | 0.000       | 0.0005(2)   | 0.000       |
| O(1)  | 0.075(6)   | 0.044(5)   | 0.067(5)   | 0.000       | -0.002(5)   | 0.000       |
| O(2)  | 0.43(6)    | 0.048(10)  | 0.13(2)    | 0.024(11)   | -0.12(3)    | 0.021(18)   |
| N(3)  | 0.0479(11) | 0.0467(11) | 0.0445(10) | -0.0012(8)  | 0.0005(8)   | -0.0027(8)  |
| N(4)  | 0.0479(11) | 0.0554(12) | 0.0439(9)  | 0.0016(8)   | -0.0001(8)  | -0.0020(9)  |
| N(5)  | 0.154(3)   | 0.079(2)   | 0.0579(15) | -0.0116(14) | 0.0275(18)  | 0.001(2)    |
| N(6)  | 0.0553(16) | 0.081(2)   | 0.126(3)   | -0.0165(18) | -0.0026(15) | -0.0101(14) |
| O(3)  | 0.427(11)  | 0.168(5)   | 0.109(3)   | -0.040(3)   | 0.023(5)    | 0.078(6)    |
| O(4)  | 0.084(2)   | 0.126(3)   | 0.383(8)   | 0.072(4)    | 0.046(4)    | -0.018(2)   |
| C(A1) | 0.0565(15) | 0.0541(14) | 0.0428(11) | 0.0013(10)  | -0.0016(10) | -0.0021(11) |
| C(A2) | 0.0514(14) | 0.0522(14) | 0.0461(11) | 0.0001(10)  | -0.0042(10) | -0.0033(11) |
| C(A3) | 0.0473(14) | 0.0611(16) | 0.0529(13) | 0.0012(11)  | 0.0034(10)  | -0.0039(11) |
| C(A4) | 0.0495(14) | 0.0642(16) | 0.0481(12) | 0.0008(11)  | 0.0061(10)  | -0.0015(11) |
| C(B1) | 0.0642(17) | 0.087(2)   | 0.0411(12) | 0.0004(12)  | -0.0026(11) | -0.0042(15) |
| C(B2) | 0.0554(16) | 0.088(2)   | 0.0472(13) | -0.0003(13) | -0.0074(11) | -0.0054(14) |
| C(B3) | 0.0464(15) | 0.098(2)   | 0.0602(16) | 0.0048(15)  | 0.0063(12)  | -0.0063(15) |
| C(B4) | 0.0534(16) | 0.105(3)   | 0.0538(15) | 0.0009(15)  | 0.0121(12)  | -0.0021(16) |
| C(M1) | 0.0592(15) | 0.0595(15) | 0.0428(11) | 0.0011(10)  | 0.0053(10)  | -0.0019(12) |
| C(M2) | 0.0479(13) | 0.0582(15) | 0.0546(13) | 0.0012(11)  | -0.0037(11) | -0.0038(11) |
| C(5)  | 0.0528(15) | 0.0800(19) | 0.0453(12) | 0.0082(12)  | 0.0043(11)  | -0.0032(13) |
| C(6)  | 0.075(2)   | 0.097(2)   | 0.0444(13) | 0.0018(14)  | 0.0090(13)  | 0.0038(17)  |
| C(7)  | 0.088(3)   | 0.143(4)   | 0.0496(16) | 0.005(2)    | 0.0166(16)  | 0.016(2)    |
| C(8)  | 0.075(2)   | 0.180(5)   | 0.0571(18) | 0.038(3)    | 0.0136(17)  | 0.008(3)    |
| C(9)  | 0.082(3)   | 0.128(4)   | 0.083(2)   | 0.051(3)    | 0.008(2)    | -0.007(2)   |
| C(10) | 0.081(2)   | 0.090(2)   | 0.0729(19) | 0.0215(18)  | 0.0064(16)  | -0.0041(19) |
| C(11) | 0.0480(14) | 0.0769(19) | 0.0559(14) | 0.0054(12)  | -0.0046(11) | 0.0011(13)  |
| C(12) | 0.0504(16) | 0.089(2)   | 0.0752(19) | -0.0081(16) | -0.0087(13) | -0.0039(15) |
| C(13) | 0.060(2)   | 0.119(3)   | 0.105(3)   | -0.004(2)   | -0.0187(19) | -0.012(2)   |
| C(14) | 0.058(2)   | 0.157(5)   | 0.113(3)   | 0.031(3)    | -0.024(2)   | 0.007(3)    |
| C(15) | 0.069(2)   | 0.119(4)   | 0.129(4)   | 0.042(3)    | -0.006(2)   | 0.026(2)    |
| C(16) | 0.069(2)   | 0.079(2)   | 0.099(3)   | 0.0130(19)  | -0.0021(18) | 0.0098(17)  |
| C(17) | 0.143(5)   | 0.114(4)   | 0.091(3)   | -0.010(3)   | -0.007(3)   | 0.034(3)    |
| C(18) | 0.073(2)   | 0.089(3)   | 0.106(3)   | 0.000(2)    | 0.015(2)    | -0.012(2)   |
| C(19) | 0.087(3)   | 0.090(3)   | 0.122(4)   | 0.003(2)    | -0.008(3)   | 0.011(2)    |

**Table S41.** Continued

| atom   | $U_{11}$  | $U_{22}$  | $U_{33}$  | $U_{23}$   | $U_{13}$   | $U_{12}$  |
|--------|-----------|-----------|-----------|------------|------------|-----------|
| C(20)  | 0.087(4)  | 0.209(7)  | 0.263(9)  | 0.115(7)   | -0.031(5)  | 0.000(4)  |
| C(21)  | 0.195(7)  | 0.160(6)  | 0.291(10) | 0.032(7)   | -0.127(7)  | -0.035(5) |
| C(22)  | 0.382(15) | 0.131(5)  | 0.226(10) | 0.093(6)   | 0.150(10)  | 0.035(8)  |
| C(23)  | 0.103(3)  | 0.083(3)  | 0.104(3)  | -0.006(2)  | 0.030(2)   | 0.002(2)  |
| C(24)  | 0.301(11) | 0.204(8)  | 0.221(9)  | -0.083(7)  | 0.000(8)   | 0.093(8)  |
| C(25)  | 0.192(8)  | 0.313(13) | 0.196(8)  | 0.144(8)   | 0.077(7)   | 0.108(8)  |
| C(26)  | 0.101(5)  | 0.184(8)  | 0.54(2)   | 0.170(11)  | 0.109(9)   | 0.056(5)  |
| N(2)   | 0.075(2)  | 0.063(2)  | 0.087(3)  | 0.000      | -0.003(2)  | 0.000     |
| N(1)   | 0.048(7)  | 0.064(3)  | 0.053(6)  | 0.002(3)   | -0.001(3)  | -0.003(3) |
| C(1)   | 0.061(4)  | 0.052(3)  | 0.066(4)  | -0.002(3)  | -0.003(3)  | -0.004(3) |
| C(3)   | 0.082(6)  | 0.058(5)  | 0.064(4)  | 0.004(3)   | 0.015(4)   | 0.001(4)  |
| C(2)   | 0.078(5)  | 0.072(4)  | 0.077(4)  | -0.004(3)  | 0.005(3)   | 0.011(4)  |
| C(4)   | 0.101(7)  | 0.068(6)  | 0.122(9)  | 0.009(5)   | 0.048(6)   | -0.015(4) |
| O(1S)  | 0.209(10) | 0.095(6)  | 0.263(12) | -0.015(6)  | 0.120(9)   | 0.012(6)  |
| C(1S)  | 0.236(10) | 0.140(6)  | 0.264(11) | -0.067(6)  | 0.133(8)   | -0.052(6) |
| C(2S)  | 0.30(2)   | 0.193(18) | 0.30(2)   | 0.000      | -0.065(19) | 0.000     |
| C(3S)  | 0.28(3)   | 0.183(18) | 0.21(2)   | 0.085(17)  | 0.037(18)  | 0.089(18) |
| O(2SB) | 0.24(3)   | 0.177(17) | 0.189(19) | -0.016(15) | 0.018(16)  | 0.067(19) |
| O(2SA) | 0.24(3)   | 0.177(17) | 0.189(19) | -0.016(15) | 0.018(16)  | 0.067(19) |

<sup>a</sup>The estimated standard deviations of the least significant digits are given in parentheses.

The anisotropic displacement factor exponent takes the form:  $-2 \pi [\text{h}^2 U_{11} + \dots + 2 \text{h k a}^* \text{b}^* U_{12}]$ .

**Table S42.** Hydrogen Atom Coordinates and Equivalent Isotropic Displacement Parameters ( $\text{\AA}^2$ ) for  $[\text{Co}(\text{TpivPP})(2\text{-MeHIm})0.3(\text{O}_2)] \cdot 1.8\text{C}_2\text{H}_5\text{OH}^a$  (300 K,  $C2/c$  form)

| atom   | $x$    | $y$    | $z$    | $U(\text{eq})$ |
|--------|--------|--------|--------|----------------|
| H(5A)  | 0.6034 | 0.7522 | 0.5443 | 0.116          |
| H(6A)  | 0.3124 | 0.7380 | 0.6219 | 0.105          |
| H(BA)  | 0.4532 | 0.8656 | 0.4753 | 0.077          |
| H(BB)  | 0.3346 | 0.8612 | 0.5265 | 0.077          |
| H(BC)  | 0.2352 | 0.8447 | 0.7909 | 0.082          |
| H(BD)  | 0.2875 | 0.8515 | 0.9140 | 0.085          |
| H(7A)  | 0.6539 | 0.7825 | 0.3668 | 0.112          |
| H(8A)  | 0.6588 | 0.8907 | 0.3156 | 0.124          |
| H(9A)  | 0.6230 | 0.9821 | 0.3778 | 0.117          |
| H(10A) | 0.5819 | 0.9712 | 0.4947 | 0.097          |
| H(13A) | 0.1369 | 0.7527 | 0.5769 | 0.114          |
| H(14A) | 0.0728 | 0.8518 | 0.5733 | 0.132          |
| H(15A) | 0.1229 | 0.9506 | 0.6131 | 0.127          |
| H(16A) | 0.2367 | 0.9526 | 0.6580 | 0.099          |
| H(20A) | 0.7021 | 0.5878 | 0.5035 | 0.281          |
| H(20B) | 0.6784 | 0.5670 | 0.5816 | 0.281          |
| H(20C) | 0.7104 | 0.6393 | 0.5683 | 0.281          |
| H(21A) | 0.5785 | 0.5571 | 0.4559 | 0.327          |
| H(21B) | 0.5145 | 0.5897 | 0.4956 | 0.327          |
| H(21C) | 0.5626 | 0.5360 | 0.5362 | 0.327          |
| H(22A) | 0.6096 | 0.6878 | 0.6222 | 0.365          |
| H(22B) | 0.5820 | 0.6137 | 0.6347 | 0.365          |
| H(22C) | 0.5335 | 0.6672 | 0.5943 | 0.365          |
| H(24A) | 0.3184 | 0.5277 | 0.5876 | 0.364          |
| H(24B) | 0.2912 | 0.5887 | 0.5395 | 0.364          |
| H(24C) | 0.2384 | 0.5485 | 0.5878 | 0.364          |
| H(25A) | 0.3032 | 0.6063 | 0.7558 | 0.348          |
| H(25B) | 0.3187 | 0.5375 | 0.7161 | 0.348          |
| H(25C) | 0.2412 | 0.5657 | 0.7174 | 0.348          |
| H(26A) | 0.3859 | 0.6690 | 0.6750 | 0.409          |
| H(26B) | 0.3779 | 0.6544 | 0.5912 | 0.409          |
| H(26C) | 0.4042 | 0.5969 | 0.6445 | 0.409          |
| H(2A)  | 0.5139 | 1.1233 | 0.7356 | 0.090          |
| H(3A)  | 0.4097 | 0.9821 | 0.8339 | 0.081          |

**Table S42.** Continued

| atom  | $x$    | $y$    | $z$    | $U(\text{eq})$ |
|-------|--------|--------|--------|----------------|
| H(2B) | 0.4235 | 1.1029 | 0.8288 | 0.091          |
| H(4A) | 0.5877 | 0.9732 | 0.6607 | 0.144          |
| H(4B) | 0.6200 | 1.0421 | 0.6886 | 0.144          |
| H(4C) | 0.5603 | 1.0421 | 0.6275 | 0.144          |

## Supporting Information

**Table S43.** Complete Crystallographic Details for [Co(TpivPP)(2-MeHIm)]·1.8C<sub>2</sub>H<sub>5</sub>OH (100 K, C2/c form)

|                                                              |                                                                      |
|--------------------------------------------------------------|----------------------------------------------------------------------|
| formula                                                      | C <sub>71.6</sub> H <sub>82</sub> CoN <sub>10</sub> O <sub>5.8</sub> |
| FW, amu                                                      | 1234.40                                                              |
| <i>a</i> , Å                                                 | 18.6326(3)                                                           |
| <i>b</i> , Å                                                 | 19.6158(3)                                                           |
| <i>c</i> , Å                                                 | 17.9050(3)                                                           |
| $\beta$ , deg                                                | 90.8790(10)                                                          |
| <i>V</i> , Å <sup>3</sup>                                    | 6543.39(18)                                                          |
| space group                                                  | C2/c                                                                 |
| <i>Z</i>                                                     | 4                                                                    |
| D <sub>c</sub> , g/cm <sup>3</sup>                           | 1.253                                                                |
| F(000)                                                       | 2620                                                                 |
| $\mu$ , mm <sup>-1</sup>                                     | 0.322                                                                |
| crystal dimensions, mm                                       | 0.37 × 0.21 × 0.16                                                   |
| radiation                                                    | MoK $\alpha$ , $\bar{\lambda}$ = 0.71073 Å                           |
| temperature, K                                               | 100(2)                                                               |
| diffractometer                                               | Bruker Apex CCD                                                      |
| $\theta$ range for collected data, deg                       | 1.51–30.56                                                           |
| index range                                                  | –26 ≤ <i>h</i> ≤ 26<br>–28 ≤ <i>k</i> ≤ 28<br>–25 ≤ <i>l</i> ≤ 25    |
| total data collected                                         | 66118                                                                |
| absorption correction                                        | Semi-empirical from equiv                                            |
| relative transmission coefficients (I)                       | 0.9503 and 0.8901                                                    |
| unique data                                                  | 9999 ( <i>R</i> <sub>int</sub> = 0.0288)                             |
| unique observed data [ <i>I</i> > 2 $\sigma$ ( <i>I</i> )]   | 7966                                                                 |
| refinement method                                            | Full-matrix least-squares on F <sup>2</sup>                          |
| data/restraints/parameters                                   | 9999/1/450                                                           |
| goodness-of-fit (based on <i>F</i> <sup>2</sup> )            | 1.072                                                                |
| final <i>R</i> indices [ <i>I</i> > 2 $\sigma$ ( <i>I</i> )] | <i>R</i> <sub>1</sub> = 0.0572, <i>wR</i> <sub>2</sub> = 0.1633      |
| final <i>R</i> indices (all data)                            | <i>R</i> <sub>1</sub> = 0.0733, <i>wR</i> <sub>2</sub> = 0.1776      |

**Table S44.** Atomic Coordinates and Equivalent Isotropic Displacement Parameters ( $\text{\AA}^2$ ) for  $[\text{Co}(\text{TpivPP})(2\text{-MeHIm})]\cdot 1.8\text{C}_2\text{H}_5\text{OH}^a$  (100 K,  $C2/c$  form)<sup>a</sup>

| atom  | <i>x</i>    | <i>y</i>    | <i>z</i>    | <i>U</i> (eq) |
|-------|-------------|-------------|-------------|---------------|
| Co(1) | 0.5000      | 0.86671(2)  | 0.7500      | 0.0209(1)     |
| O(1)  | 0.38012(19) | 0.66005(14) | 1.08391(14) | 0.0919(9)     |
| O(2)  | 0.1844(3)   | 0.6617(5)   | 0.6471(10)  | 0.052(3)      |
| O(2b) | 0.1889(8)   | 0.6393(12)  | 0.6195(8)   | 0.043(4)      |
| N(3)  | 0.45849(8)  | 0.86164(7)  | 0.64770(8)  | 0.0227(3)     |
| N(4)  | 0.40257(8)  | 0.85723(7)  | 0.79238(8)  | 0.0237(3)     |
| N(5)  | 0.27041(9)  | 0.73264(10) | 0.62083(12) | 0.0410(4)     |
| N(6)  | 0.38711(12) | 0.74436(10) | 0.99891(10) | 0.0446(5)     |
| C(a1) | 0.49443(10) | 0.86470(9)  | 0.58091(9)  | 0.0244(3)     |
| C(a2) | 0.38685(10) | 0.86083(9)  | 0.62767(9)  | 0.0248(3)     |
| C(a3) | 0.33799(10) | 0.85322(9)  | 0.75387(9)  | 0.0252(3)     |
| C(a4) | 0.38403(10) | 0.85704(9)  | 0.86681(9)  | 0.0252(3)     |
| C(b1) | 0.44455(11) | 0.86690(10) | 0.51860(10) | 0.0304(4)     |
| C(b2) | 0.37788(11) | 0.86443(10) | 0.54745(10) | 0.0303(4)     |
| C(b3) | 0.27876(11) | 0.84873(11) | 0.80462(10) | 0.0313(4)     |
| C(b4) | 0.30723(11) | 0.85175(11) | 0.87450(11) | 0.0314(4)     |
| C(m1) | 0.32974(10) | 0.85584(9)  | 0.67648(10) | 0.0256(3)     |
| C(m2) | 0.43165(10) | 0.86326(9)  | 0.92710(9)  | 0.0248(3)     |
| C(5)  | 0.25527(10) | 0.85267(11) | 0.64417(10) | 0.0303(4)     |
| C(6)  | 0.22700(11) | 0.79173(12) | 0.61652(11) | 0.0353(4)     |
| C(7)  | 0.15763(12) | 0.79003(15) | 0.58559(14) | 0.0485(6)     |
| C(8)  | 0.11603(13) | 0.84858(17) | 0.58560(16) | 0.0551(7)     |
| C(9)  | 0.14249(14) | 0.90835(16) | 0.61456(17) | 0.0551(7)     |
| C(10) | 0.21224(13) | 0.91099(13) | 0.64223(14) | 0.0423(5)     |
| C(11) | 0.40232(10) | 0.86601(10) | 1.00477(10) | 0.0282(4)     |
| C(12) | 0.38204(12) | 0.80569(12) | 1.04099(10) | 0.0357(4)     |
| C(13) | 0.35822(14) | 0.80743(16) | 1.11461(11) | 0.0497(6)     |
| C(14) | 0.35463(12) | 0.86940(17) | 1.15129(12) | 0.0522(7)     |
| C(15) | 0.37369(12) | 0.92907(15) | 1.11666(13) | 0.0477(6)     |
| C(16) | 0.39742(12) | 0.92745(12) | 1.04289(12) | 0.0373(4)     |
| C(17) | 0.24847(12) | 0.66843(13) | 0.63420(12) | 0.0387(5)     |
| C(18) | 0.38752(15) | 0.67857(14) | 1.01884(15) | 0.0496(6)     |
| C(19) | 0.30547(12) | 0.61338(12) | 0.64387(13) | 0.0400(5)     |
| C(20) | 0.2923(2)   | 0.56210(19) | 0.5799(2)   | 0.0757(10)    |



**Table S44.** Continued

| atom  | <i>x</i>    | <i>y</i>    | <i>z</i>    | <i>U</i> (eq) |
|-------|-------------|-------------|-------------|---------------|
| C(21) | 0.29197(15) | 0.57786(15) | 0.71869(16) | 0.0522(6)     |
| C(22) | 0.38211(14) | 0.64000(14) | 0.64225(19) | 0.0540(7)     |
| C(23) | 0.39279(13) | 0.62754(12) | 0.95483(16) | 0.0461(6)     |
| C(24) | 0.44898(16) | 0.57332(16) | 0.9761(2)   | 0.0696(9)     |
| C(25) | 0.31802(14) | 0.59490(14) | 0.94817(18) | 0.0534(6)     |
| C(26) | 0.41362(17) | 0.65809(14) | 0.87909(16) | 0.0544(6)     |
| C(1S) | 0.0272(4)   | 0.7630(2)   | 0.7192(4)   | 0.150(3)      |
| O(1S) | 0.0501(2)   | 0.70638(19) | 0.6866(3)   | 0.0712(14)    |
| N(2)  | 0.5000      | 1.08722(11) | 0.7500      | 0.0284(4)     |
| C(1)  | 0.4768(2)   | 1.02648(18) | 0.7759(2)   | 0.0258(7)     |
| N(1)  | 0.5105(3)   | 0.97599(15) | 0.7415(3)   | 0.0240(9)     |
| C(3)  | 0.5576(2)   | 1.0079(2)   | 0.6931(2)   | 0.0275(7)     |
| C(2)  | 0.5519(2)   | 1.0759(2)   | 0.6986(2)   | 0.0292(7)     |
| C(4)  | 0.4207(3)   | 1.0205(2)   | 0.8338(3)   | 0.0358(9)     |
| O(2S) | 0.4521(3)   | 0.5424(3)   | 0.1557(3)   | 0.0680(15)    |
| C(2S) | 0.4574(5)   | 0.5600(4)   | 0.2252(4)   | 0.065(2)      |
| C(3S) | 0.5000      | 0.5144(7)   | 0.2500      | 0.142(4)      |

<sup>a</sup>*U*(eq) is defined as one third of the trace of the orthogonalized  $\mathbf{U}_{ij}$  tensor.

The estimated standard deviations of the least significant digits are given in parentheses.

**Table S45.** Bond Lengths for [Co(TpivPP)(2-MeHIm)]·1.8C<sub>2</sub>H<sub>5</sub>OH<sup>a</sup> (100 K, C2/c form)<sup>a</sup>

| bond          | length (Å) | bond           | length (Å) |
|---------------|------------|----------------|------------|
| Co(1)–N(3)#1  | 1.9799(14) | C(14)–H(14a)   | 0.9500     |
| Co(1)–N(3)    | 1.9799(14) | C(15)–C(16)    | 1.400(3)   |
| Co(1)–N(4)#1  | 1.9869(15) | C(15)–H(15a)   | 0.9500     |
| Co(1)–N(4)    | 1.9869(15) | C(16)–H(16a)   | 0.9500     |
| Co(1)–N(1)    | 2.158(3)   | C(17)–C(19)    | 1.523(3)   |
| Co(1)–N(1)#1  | 2.158(3)   | C(18)–C(23)    | 1.526(4)   |
| O(1)–C(18)    | 1.230(3)   | C(19)–C(22)    | 1.521(3)   |
| O(2)–C(17)    | 1.226(4)   | C(19)–C(21)    | 1.534(4)   |
| O(2b)–C(17)   | 1.272(7)   | C(19)–C(20)    | 1.541(4)   |
| N(3)–C(a2)    | 1.377(2)   | C(20)–H(20a)   | 0.9800     |
| N(3)–C(a1)    | 1.381(2)   | C(20)–H(20b)   | 0.9800     |
| N(4)–C(a3)    | 1.380(2)   | C(20)–H(20C)   | 0.9800     |
| N(4)–C(a4)    | 1.382(2)   | C(21)–H(21a)   | 0.9800     |
| N(5)–C(17)    | 1.347(3)   | C(21)–H(21b)   | 0.9800     |
| N(5)–C(6)     | 1.415(3)   | C(21)–H(21C)   | 0.9800     |
| N(5)–H(5a)    | 0.8800     | C(22)–H(22a)   | 0.9800     |
| N(6)–C(18)    | 1.339(3)   | C(22)–H(22b)   | 0.9800     |
| N(6)–C(12)    | 1.423(3)   | C(22)–H(22C)   | 0.9800     |
| N(6)–H(6a)    | 0.8800     | C(23)–C(25)    | 1.536(3)   |
| C(a1)–C(m2#1) | 1.387(3)   | C(23)–C(24)    | 1.536(4)   |
| C(a1)–C(b1)   | 1.442(2)   | C(23)–C(26)    | 1.538(4)   |
| C(a2)–C(m1)   | 1.391(3)   | C(24)–H(24a)   | 0.9800     |
| C(a2)–C(b2)   | 1.445(2)   | C(24)–H(24b)   | 0.9800     |
| C(a3)–C(m1)   | 1.393(2)   | C(24)–H(24C)   | 0.9800     |
| C(a3)–C(b3)   | 1.443(3)   | C(25)–H(25a)   | 0.9800     |
| C(a4)–C(m2)   | 1.392(2)   | C(25)–H(25b)   | 0.9800     |
| C(a4)–C(b4)   | 1.443(3)   | C(25)–H(25C)   | 0.9800     |
| C(b1)–C(b2)   | 1.354(3)   | C(26)–H(26a)   | 0.9800     |
| C(b1)–H(ba)   | 0.9500     | C(26)–H(26b)   | 0.9800     |
| C(b2)–H(bb)   | 0.9500     | C(26)–H(26C)   | 0.9800     |
| C(b3)–C(b4)   | 1.353(3)   | C(1S)–O(1S)    | 1.327(6)   |
| C(b3)–H(bc)   | 0.9500     | C(1S)–C(1S)#2) | 1.510(9)   |
| C(b4)–H(bd)   | 0.9500     | N(2)–C(1)#1)   | 1.352(4)   |
| C(m1)–C(5)    | 1.496(3)   | N(2)–C(1)      | 1.352(4)   |

**Table S45.** Continued

| bond          | length (Å) | bond           | length (Å) |
|---------------|------------|----------------|------------|
| C(m2)–C(a1#1) | 1.387(3)   | N(2)–C(2)#1)   | 1.363(4)   |
| C(m2)–C(11)   | 1.503(2)   | N(2)–C(2)      | 1.363(4)   |
| C(5)–C(6)     | 1.394(3)   | N(2)–H(2a)     | 0.8800     |
| C(5)–C(10)    | 1.397(3)   | C(1)–N(1)      | 1.329(5)   |
| C(6)–C(7)     | 1.399(3)   | C(1)–C(4)      | 1.488(6)   |
| C(7)–C(8)     | 1.386(4)   | N(1)–C(3)      | 1.391(6)   |
| C(7)–H(7a)    | 0.9500     | C(3)–C(2)      | 1.342(6)   |
| C(8)–C(9)     | 1.371(4)   | C(3)–H(3a)     | 0.9500     |
| C(8)–H(8a)    | 0.9500     | C(2)–H(2b)     | 0.9500     |
| C(9)–C(10)    | 1.385(3)   | C(4)–H(4a)     | 0.9800     |
| C(9)–H(9a)    | 0.9500     | C(4)–H(4b)     | 0.9800     |
| C(10)–H(10a)  | 0.9500     | C(4)–H(4c)     | 0.9800     |
| C(11)–C(16)   | 1.389(3)   | O(2S)–C(2S)    | 1.292(9)   |
| C(11)–C(12)   | 1.404(3)   | C(2S)–C(3S)    | 1.271(10)  |
| C(12)–C(13)   | 1.398(3)   | C(2S)–C(2S)#3) | 1.808(17)  |
| C(13)–C(14)   | 1.384(4)   | C(3S)–C(2S)#3) | 1.271(10)  |
| C(13)–H(13a)  | 0.9500     |                |            |
| C(14)–C(15)   | 1.374(4)   |                |            |

<sup>a</sup>The estimated standard deviations of the least significant digits are given in parentheses.

**Table S46.** Bond Angles for [Co(TpivPP)(2-MeHIm)]·1.8C<sub>2</sub>H<sub>5</sub>OH<sup>a</sup> (100 K, C2/c form)<sup>a</sup>

| angle               | degree     | angle               | degree     |
|---------------------|------------|---------------------|------------|
| N(3)#1–Co(1)–N(3)   | 174.24(8)  | C(15)–C(16)–H(16a)  | 119.7      |
| N(3)#1–Co(1)–N(4)#1 | 90.13(6)   | O(2)–C(17)–O(2b)    | 30.9(4)    |
| N(3)–Co(1)–N(4)#1   | 89.33(6)   | O(2)–C(17)–N(5)     | 115.6(4)   |
| N(3)#1–Co(1)–N(4)   | 89.33(6)   | O(2b)–C(17)–N(5)    | 130.5(9)   |
| N(3)–Co(1)–N(4)     | 90.13(6)   | O(2)–C(17)–C(19)    | 125.6(3)   |
| N(4)#1–Co(1)–N(4)   | 169.26(9)  | O(2b)–C(17)–C(19)   | 108.1(12)  |
| N(3)#1–Co(1)–N(1)   | 94.60(19)  | N(5)–C(17)–C(19)    | 118.05(19) |
| N(3)–Co(1)–N(1)     | 91.13(19)  | O(1)–C(18)–N(6)     | 122.5(3)   |
| N(4)#1–Co(1)–N(1)   | 88.94(10)  | O(1)–C(18)–C(23)    | 121.8(3)   |
| N(4)–Co(1)–N(1)     | 101.79(10) | N(6)–C(18)–C(23)    | 115.6(2)   |
| N(3)#1–Co(1)–N(1)#1 | 91.13(19)  | C(22)–C(19)–C(17)   | 114.1(2)   |
| N(3)–Co(1)–N(1)#1   | 94.60(19)  | C(22)–C(19)–C(21)   | 109.8(2)   |
| N(4)#1–Co(1)–N(1)#1 | 101.79(10) | C(17)–C(19)–C(21)   | 107.33(18) |
| N(4)–Co(1)–N(1)#1   | 88.95(10)  | C(22)–C(19)–C(20)   | 110.4(2)   |
| N(1)–Co(1)–N(1)#1   | 13.29(15)  | C(17)–C(19)–C(20)   | 106.0(2)   |
| C(a2)–N(3)–C(a1)    | 104.84(14) | C(21)–C(19)–C(20)   | 109.0(2)   |
| C(a2)–N(3)–Co(1)    | 127.23(12) | C(19)–C(20)–H(20a)  | 109.5      |
| C(a1)–N(3)–Co(1)    | 127.68(12) | C(19)–C(20)–H(20b)  | 109.5      |
| C(a3)–N(4)–C(a4)    | 104.64(15) | H(20a)–C(20)–H(20b) | 109.5      |
| C(a3)–N(4)–Co(1)    | 127.54(12) | C(19)–C(20)–H(20C)  | 109.5      |
| C(a4)–N(4)–Co(1)    | 127.73(12) | H(20a)–C(20)–H(20C) | 109.5      |
| C(17)–N(5)–C(6)     | 126.94(19) | H(20b)–C(20)–H(20C) | 109.5      |
| C(17)–N(5)–H(5a)    | 116.5      | C(19)–C(21)–H(21a)  | 109.5      |
| C(6)–N(5)–H(5a)     | 116.5      | C(19)–C(21)–H(21b)  | 109.5      |
| C(18)–N(6)–C(12)    | 132.4(2)   | H(21a)–C(21)–H(21b) | 109.5      |
| C(18)–N(6)–H(6a)    | 113.8      | C(19)–C(21)–H(21C)  | 109.5      |
| C(12)–N(6)–H(6a)    | 113.8      | H(21a)–C(21)–H(21C) | 109.5      |
| N(3)–C(a1)–C(m2#1)  | 125.73(16) | H(21b)–C(21)–H(21C) | 109.5      |
| N(3)–C(a1)–C(b1)    | 110.86(16) | C(19)–C(22)–H(22a)  | 109.5      |
| C(m2#1)–C(a1)–C(b1) | 123.36(16) | C(19)–C(22)–H(22b)  | 109.5      |
| N(3)–C(a2)–C(m1)    | 125.82(16) | H(22a)–C(22)–H(22b) | 109.5      |
| N(3)–C(a2)–C(b2)    | 110.80(16) | C(19)–C(22)–H(22C)  | 109.5      |
| C(m1)–C(a2)–C(b2)   | 123.36(17) | H(22a)–C(22)–H(22C) | 109.5      |
| N(4)–C(a3)–C(m1)    | 125.25(17) | H(22b)–C(22)–H(22C) | 109.5      |

**Table S46.** Continued

| angle               | degree     | angle               | degree   |
|---------------------|------------|---------------------|----------|
| N(4)–C(a3)–C(b3)    | 111.00(15) | C(18)–C(23)–C(25)   | 105.2(2) |
| C(m1)–C(a3)–C(b3)   | 123.70(17) | C(18)–C(23)–C(24)   | 108.6(2) |
| N(4)–C(a4)–C(m2)    | 125.58(17) | C(25)–C(23)–C(24)   | 110.1(2) |
| N(4)–C(a4)–C(b4)    | 110.79(15) | C(18)–C(23)–C(26)   | 115.3(2) |
| C(m2)–C(a4)–C(b4)   | 123.60(16) | C(25)–C(23)–C(26)   | 109.6(2) |
| C(b2)–C(b1)–C(a1)   | 106.74(16) | C(24)–C(23)–C(26)   | 108.0(3) |
| C(b2)–C(b1)–H(ba)   | 126.6      | C(23)–C(24)–H(24a)  | 109.5    |
| C(a1)–C(b1)–H(ba)   | 126.6      | C(23)–C(24)–H(24b)  | 109.5    |
| C(b1)–C(b2)–C(a2)   | 106.75(16) | H(24a)–C(24)–H(24b) | 109.5    |
| C(b1)–C(b2)–H(bb)   | 126.6      | C(23)–C(24)–H(24C)  | 109.5    |
| C(a2)–C(b2)–H(bb)   | 126.6      | H(24a)–C(24)–H(24C) | 109.5    |
| C(b4)–C(b3)–C(a3)   | 106.67(17) | H(24b)–C(24)–H(24C) | 109.5    |
| C(b4)–C(b3)–H(bc)   | 126.7      | C(23)–C(25)–H(25a)  | 109.5    |
| C(a3)–C(b3)–H(bc)   | 126.7      | C(23)–C(25)–H(25b)  | 109.5    |
| C(b3)–C(b4)–C(a4)   | 106.87(16) | H(25a)–C(25)–H(25b) | 109.5    |
| C(b3)–C(b4)–H(bd)   | 126.6      | C(23)–C(25)–H(25C)  | 109.5    |
| C(a4)–C(b4)–H(bd)   | 126.6      | H(25a)–C(25)–H(25C) | 109.5    |
| C(a2)–C(m1)–C(a3)   | 123.63(17) | H(25b)–C(25)–H(25C) | 109.5    |
| C(a2)–C(m1)–C(5)    | 118.29(16) | C(23)–C(26)–H(26a)  | 109.5    |
| C(a3)–C(m1)–C(5)    | 118.08(17) | C(23)–C(26)–H(26b)  | 109.5    |
| C(a1#1)–C(m2)–C(a4) | 122.93(16) | H(26a)–C(26)–H(26b) | 109.5    |
| C(a1#1)–C(m2)–C(11) | 118.07(16) | C(23)–C(26)–H(26C)  | 109.5    |
| C(a4)–C(m2)–C(11)   | 118.96(17) | H(26a)–C(26)–H(26C) | 109.5    |
| C(6)–C(5)–C(10)     | 118.66(19) | H(26b)–C(26)–H(26C) | 109.5    |
| C(6)–C(5)–C(m1)     | 121.07(18) | O(1S)–C(1S)–C(1S)#2 | 123.0(3) |
| C(10)–C(5)–C(m1)    | 120.27(19) | C(1)#1–N(2)–C(1)    | 56.4(3)  |
| C(5)–C(6)–C(7)      | 120.2(2)   | C(1)#1–N(2)–C(2)#1  | 108.8(3) |
| C(5)–C(6)–N(5)      | 118.06(17) | C(1)–N(2)–C(2)#1    | 52.5(2)  |
| C(7)–C(6)–N(5)      | 121.7(2)   | C(1)#1–N(2)–C(2)    | 52.5(2)  |
| C(8)–C(7)–C(6)      | 119.6(2)   | C(1)–N(2)–C(2)      | 108.8(3) |
| C(8)–C(7)–H(7a)     | 120.2      | C(2)#1–N(2)–C(2)    | 161.2(4) |
| C(6)–C(7)–H(7a)     | 120.2      | C(1)#1–N(2)–H(2a)   | 176.5    |
| C(9)–C(8)–C(7)      | 120.7(2)   | C(1)–N(2)–H(2a)     | 125.6    |
| C(9)–C(8)–H(8a)     | 119.6      | C(2)#1–N(2)–H(2a)   | 73.1     |

**Table S46.** Continued

| angle              | degree     | angle               | degree   |
|--------------------|------------|---------------------|----------|
| C(7)–C(8)–H(8a)    | 119.6      | C(2)–N(2)–H(2a)     | 125.6    |
| C(8)–C(9)–C(10)    | 119.8(2)   | N(1)–C(1)–N(2)      | 110.0(3) |
| C(8)–C(9)–H(9a)    | 120.1      | N(1)–C(1)–C(4)      | 127.3(3) |
| C(10)–C(9)–H(9a)   | 120.1      | N(2)–C(1)–C(4)      | 122.7(3) |
| C(9)–C(10)–C(5)    | 120.9(2)   | C(1)–N(1)–C(3)      | 105.1(3) |
| C(9)–C(10)–H(10a)  | 119.6      | C(1)–N(1)–Co(1)     | 131.6(3) |
| C(5)–C(10)–H(10a)  | 119.6      | C(3)–N(1)–Co(1)     | 123.3(2) |
| C(16)–C(11)–C(12)  | 118.96(18) | C(2)–C(3)–N(1)      | 110.5(4) |
| C(16)–C(11)–C(m2)  | 120.90(18) | C(2)–C(3)–H(3a)     | 124.8    |
| C(12)–C(11)–C(m2)  | 120.10(17) | N(1)–C(3)–H(3a)     | 124.8    |
| C(13)–C(12)–C(11)  | 120.4(2)   | C(3)–C(2)–N(2)      | 105.6(3) |
| C(13)–C(12)–N(6)   | 123.0(2)   | C(3)–C(2)–H(2b)     | 127.2    |
| C(11)–C(12)–N(6)   | 116.57(17) | N(2)–C(2)–H(2b)     | 127.2    |
| C(14)–C(13)–C(12)  | 119.2(2)   | C(1)–C(4)–H(4a)     | 109.5    |
| C(14)–C(13)–H(13a) | 120.4      | C(1)–C(4)–H(4b)     | 109.5    |
| C(12)–C(13)–H(13a) | 120.4      | H(4a)–C(4)–H(4b)    | 109.5    |
| C(15)–C(14)–C(13)  | 121.3(2)   | C(1)–C(4)–H(4C)     | 109.5    |
| C(15)–C(14)–H(14a) | 119.3      | H(4a)–C(4)–H(4C)    | 109.5    |
| C(13)–C(14)–H(14a) | 119.3      | H(4b)–C(4)–H(4C)    | 109.5    |
| C(14)–C(15)–C(16)  | 119.6(2)   | C(3S)–C(2S)–O(2S)   | 100.8(6) |
| C(14)–C(15)–H(15a) | 120.2      | C(3S)–C(2S)–C(2S)#3 | 44.6(6)  |
| C(16)–C(15)–H(15a) | 120.2      | O(2S)–C(2S)–C(2S)#3 | 121.7(9) |
| C(11)–C(16)–C(15)  | 120.5(2)   | C(2S)#3–C(3S)–C(2S) | 90.7(11) |
| C(11)–C(16)–H(16a) | 119.7      |                     |          |

<sup>a</sup>The estimated standard deviations of the least significant digits are given in parentheses.

**Table S47.** Anisotropic Displacement Parameters ( $\text{\AA}^2$ ) for  $[\text{Co}(\text{TpivPP})(2\text{-MeHIm})]\cdot 1.8\text{C}_2\text{H}_5\text{OH}^a$   
(100 K,  $C2/c$  form)<sup>a</sup>

| atom  | $U_{11}$   | $U_{22}$   | $U_{33}$   | $U_{23}$    | $U_{13}$    | $U_{12}$    |
|-------|------------|------------|------------|-------------|-------------|-------------|
| Co(1) | 0.0232(2)  | 0.0244(2)  | 0.0150(2)  | 0.000       | -0.0009(1)  | 0.000       |
| O(1)  | 0.145(3)   | 0.0750(16) | 0.0546(13) | 0.0301(12)  | -0.0190(15) | -0.0350(16) |
| O(2)  | 0.0293(14) | 0.040(3)   | 0.088(6)   | 0.015(4)    | 0.015(2)    | 0.0002(14)  |
| O(2B) | 0.035(3)   | 0.049(7)   | 0.044(5)   | 0.007(4)    | -0.008(3)   | -0.014(4)   |
| N(3)  | 0.0252(7)  | 0.0256(7)  | 0.0172(6)  | 0.0000(5)   | -0.0009(5)  | -0.0004(5)  |
| N(4)  | 0.0261(7)  | 0.0283(7)  | 0.0165(6)  | 0.0003(5)   | -0.0010(5)  | 0.0000(5)   |
| N(5)  | 0.0218(8)  | 0.0447(10) | 0.0564(11) | -0.0188(9)  | -0.0031(7)  | -0.0021(7)  |
| N(6)  | 0.0693(14) | 0.0403(10) | 0.0243(8)  | 0.0062(7)   | 0.0018(8)   | -0.0060(9)  |
| C(A1) | 0.0294(8)  | 0.0265(8)  | 0.0172(7)  | 0.0005(6)   | -0.0019(6)  | -0.0012(6)  |
| C(A2) | 0.0277(8)  | 0.0284(8)  | 0.0182(7)  | 0.0001(6)   | -0.0028(6)  | -0.0002(6)  |
| C(A3) | 0.0247(8)  | 0.0300(8)  | 0.0210(7)  | 0.0009(6)   | -0.0006(6)  | -0.0001(6)  |
| C(A4) | 0.0271(8)  | 0.0299(8)  | 0.0186(7)  | 0.0008(6)   | 0.0018(6)   | 0.0010(6)   |
| C(B1) | 0.0328(9)  | 0.0419(10) | 0.0164(7)  | 0.0022(6)   | -0.0023(6)  | -0.0011(8)  |
| C(B2) | 0.0310(9)  | 0.0419(10) | 0.0180(7)  | 0.0010(7)   | -0.0047(6)  | 0.0001(7)   |
| C(B3) | 0.0254(9)  | 0.0436(10) | 0.0248(8)  | 0.0011(7)   | 0.0015(7)   | -0.0007(7)  |
| C(B4) | 0.0283(9)  | 0.0429(10) | 0.0230(8)  | 0.0010(7)   | 0.0034(7)   | -0.0013(8)  |
| C(M1) | 0.0254(8)  | 0.0294(8)  | 0.0218(7)  | 0.0001(6)   | -0.0033(6)  | 0.0008(6)   |
| C(M2) | 0.0297(8)  | 0.0279(8)  | 0.0169(7)  | -0.0004(6)  | 0.0017(6)   | 0.0008(6)   |
| C(5)  | 0.0243(8)  | 0.0438(10) | 0.0227(8)  | 0.0014(7)   | -0.0028(6)  | 0.0024(7)   |
| C(6)  | 0.0245(9)  | 0.0498(12) | 0.0315(9)  | -0.0083(8)  | -0.0044(7)  | 0.0019(8)   |
| C(7)  | 0.0297(11) | 0.0708(17) | 0.0445(12) | -0.0074(11) | -0.0119(9)  | -0.0021(10) |
| C(8)  | 0.0300(11) | 0.0801(19) | 0.0549(15) | 0.0186(14)  | -0.0148(10) | 0.0032(12)  |
| C(9)  | 0.0369(12) | 0.0610(16) | 0.0673(17) | 0.0210(13)  | -0.0076(11) | 0.0133(11)  |
| C(10) | 0.0375(11) | 0.0430(11) | 0.0464(12) | 0.0107(9)   | -0.0038(9)  | 0.0057(9)   |
| C(11) | 0.0283(8)  | 0.0398(10) | 0.0166(7)  | -0.0037(6)  | 0.0016(6)   | 0.0004(7)   |
| C(12) | 0.0388(10) | 0.0497(12) | 0.0187(8)  | 0.0011(7)   | 0.0017(7)   | -0.0050(9)  |
| C(13) | 0.0451(13) | 0.0848(19) | 0.0194(8)  | 0.0023(10)  | 0.0042(8)   | -0.0181(12) |
| C(14) | 0.0304(10) | 0.105(2)   | 0.0209(9)  | -0.0159(11) | 0.0044(8)   | -0.0106(12) |
| C(15) | 0.0315(10) | 0.0781(17) | 0.0335(10) | -0.0290(11) | -0.0020(8)  | 0.0038(11)  |
| C(16) | 0.0345(10) | 0.0468(11) | 0.0305(9)  | -0.0123(8)  | -0.0008(8)  | 0.0026(9)   |
| C(17) | 0.0302(10) | 0.0568(13) | 0.0291(9)  | 0.0047(9)   | 0.0014(7)   | -0.0068(9)  |
| C(18) | 0.0495(14) | 0.0520(14) | 0.0469(13) | 0.0113(11)  | -0.0141(11) | -0.0091(11) |
| C(19) | 0.0379(11) | 0.0446(11) | 0.0378(11) | -0.0085(9)  | 0.0085(9)   | -0.0033(9)  |
| C(20) | 0.088(2)   | 0.077(2)   | 0.0629(19) | -0.0338(17) | 0.0149(17)  | -0.0118(19) |

**Table S47.** Continued

| atom  | $U_{11}$   | $U_{22}$   | $U_{33}$   | $U_{23}$    | $U_{13}$    | $U_{12}$    |
|-------|------------|------------|------------|-------------|-------------|-------------|
| C(21) | 0.0477(14) | 0.0580(15) | 0.0511(14) | 0.0115(11)  | 0.0028(11)  | 0.0077(11)  |
| C(22) | 0.0317(11) | 0.0564(15) | 0.0743(19) | 0.0027(13)  | 0.0115(12)  | 0.0055(10)  |
| C(23) | 0.0364(11) | 0.0414(12) | 0.0599(15) | 0.0005(10)  | -0.0161(10) | -0.0011(9)  |
| C(24) | 0.0452(15) | 0.0549(16) | 0.108(3)   | 0.0021(16)  | -0.0345(16) | 0.0023(12)  |
| C(25) | 0.0355(12) | 0.0503(14) | 0.0740(18) | 0.0035(13)  | -0.0133(12) | -0.0012(10) |
| C(26) | 0.0597(16) | 0.0479(14) | 0.0556(15) | -0.0173(12) | 0.0020(12)  | 0.0001(12)  |
| C(1S) | 0.211(7)   | 0.070(3)   | 0.174(6)   | 0.032(3)    | 0.133(5)    | 0.045(3)    |
| O(1S) | 0.073(3)   | 0.0363(18) | 0.106(4)   | -0.001(2)   | 0.056(3)    | -0.0042(17) |
| N(2)  | 0.0271(10) | 0.0269(10) | 0.0313(11) | 0.000       | 0.0007(8)   | 0.000       |
| C(1)  | 0.0237(16) | 0.0291(17) | 0.0246(15) | 0.0012(13)  | -0.0032(14) | 0.0035(14)  |
| N(1)  | 0.021(3)   | 0.0308(12) | 0.020(3)   | -0.0016(12) | -0.0013(17) | 0.0010(12)  |
| C(3)  | 0.028(2)   | 0.035(2)   | 0.0189(17) | -0.0029(15) | 0.0026(15)  | -0.0012(16) |
| C(2)  | 0.0264(17) | 0.0347(18) | 0.0265(16) | 0.0030(13)  | -0.0012(13) | -0.0025(14) |
| C(4)  | 0.038(2)   | 0.030(2)   | 0.040(2)   | 0.0036(17)  | 0.015(2)    | 0.0054(17)  |
| O(2S) | 0.097(4)   | 0.057(3)   | 0.049(3)   | 0.014(2)    | -0.003(3)   | 0.016(3)    |
| C(2S) | 0.102(6)   | 0.054(4)   | 0.038(3)   | -0.007(3)   | -0.018(4)   | -0.020(4)   |
| C(3S) | 0.076(6)   | 0.165(11)  | 0.185(12)  | 0.000       | 0.046(7)    | 0.000       |

<sup>a</sup>The estimated standard deviations of the least significant digits are given in parentheses.

The anisotropic displacement factor exponent takes the form:  $-2 \pi [h^2 U_{11} + \dots + 2 h k a^* b^* U_{12}]$ .



**Table S48.** Hydrogen Atom Coordinates and Equivalent Isotropic Displacement Parameters ( $\text{\AA}^2$ ) for  $[\text{Co}(\text{TpivPP})(2\text{-MeHIm})]\cdot 1.8\text{C}_2\text{H}_5\text{OH}^a$  (100 K,  $C2/c$  form)

| atom   | $x$    | $y$    | $z$    | $U(\text{eq})$ |
|--------|--------|--------|--------|----------------|
| H(5A)  | 0.3167 | 0.7385 | 0.6141 | 0.049          |
| H(6A)  | 0.3907 | 0.7509 | 0.9505 | 0.054          |
| H(BA)  | 0.4562 | 0.8696 | 0.4672 | 0.036          |
| H(BB)  | 0.3337 | 0.8650 | 0.5202 | 0.036          |
| H(BC)  | 0.2294 | 0.8445 | 0.7915 | 0.038          |
| H(BD)  | 0.2816 | 0.8506 | 0.9199 | 0.038          |
| H(7A)  | 0.1392 | 0.7490 | 0.5647 | 0.058          |
| H(8A)  | 0.0686 | 0.8473 | 0.5653 | 0.066          |
| H(9A)  | 0.1131 | 0.9479 | 0.6156 | 0.066          |
| H(10A) | 0.2311 | 0.9530 | 0.6601 | 0.051          |
| H(13A) | 0.3447 | 0.7666 | 1.1392 | 0.060          |
| H(14A) | 0.3387 | 0.8707 | 1.2014 | 0.063          |
| H(15A) | 0.3708 | 0.9712 | 1.1426 | 0.057          |
| H(16A) | 0.4103 | 0.9687 | 1.0187 | 0.045          |
| H(20A) | 0.3011 | 0.5844 | 0.5319 | 0.114          |
| H(20B) | 0.2425 | 0.5461 | 0.5811 | 0.114          |
| H(20C) | 0.3248 | 0.5232 | 0.5860 | 0.114          |
| H(21A) | 0.3012 | 0.6099 | 0.7597 | 0.078          |
| H(21B) | 0.3241 | 0.5386 | 0.7240 | 0.078          |
| H(21C) | 0.2420 | 0.5624 | 0.7202 | 0.078          |
| H(22A) | 0.3904 | 0.6626 | 0.5943 | 0.081          |
| H(22B) | 0.4157 | 0.6019 | 0.6484 | 0.081          |
| H(22C) | 0.3896 | 0.6727 | 0.6830 | 0.081          |
| H(24A) | 0.4369 | 0.5531 | 1.0244 | 0.104          |
| H(24B) | 0.4965 | 0.5946 | 0.9798 | 0.104          |
| H(24C) | 0.4494 | 0.5377 | 0.9378 | 0.104          |
| H(25A) | 0.2825 | 0.6300 | 0.9352 | 0.080          |
| H(25B) | 0.3056 | 0.5740 | 0.9960 | 0.080          |
| H(25C) | 0.3183 | 0.5599 | 0.9091 | 0.080          |
| H(26A) | 0.3756 | 0.6890 | 0.8615 | 0.082          |
| H(26B) | 0.4198 | 0.6213 | 0.8427 | 0.082          |
| H(26C) | 0.4587 | 0.6835 | 0.8848 | 0.082          |
| H(2A)  | 0.4842 | 1.1274 | 0.7640 | 0.034          |
| H(3A)  | 0.5894 | 0.9848 | 0.6608 | 0.033          |

**Table S48.** Continued

| atom  | <i>x</i> | <i>y</i> | <i>z</i> | <i>U</i> (eq) |
|-------|----------|----------|----------|---------------|
| H(2B) | 0.5784   | 1.1092   | 0.6722   | 0.035         |
| H(4A) | 0.4120   | 0.9722   | 0.8445   | 0.054         |
| H(4B) | 0.3762   | 1.0417   | 0.8155   | 0.054         |
| H(4C) | 0.4371   | 1.0435   | 0.8795   | 0.054         |

## Supporting Information Figure Captions

Figure S1. Chemdraw of picket fence porphyrin

Figure S2. A top view thermal ellipsoid diagram of  $[\text{Co}(\text{TpivPP})(1\text{-EtIm})(\text{O}_2)]$  ( $C2/c$ ) (100K) displaying the atom labeling scheme. Thermal ellipsoids of all atoms are contoured at the 50% probability level. Hydrogen atoms have been omitted for clarity.

Figure S3. A edge-on thermal ellipsoid diagram of  $[\text{Co}(\text{TpivPP})(1\text{-EtIm})(\text{O}_2)]$  ( $C2/c$ ) (100K) displaying the atom labeling scheme. Thermal ellipsoids of all atoms are contoured at the 50% probability level. Hydrogen atoms have been omitted for clarity.

Figure S4. A top view thermal ellipsoid diagram of  $[\text{Co}(\text{TpivPP})(1\text{-EtIm})(\text{O}_2)]$  ( $P\bar{1}$ ) (100K) displaying the atom labeling scheme. Thermal ellipsoids of all atoms are contoured at the 50% probability level. Hydrogen atoms have been omitted for clarity.

Figure S5. A edge-on thermal ellipsoid diagram of  $[\text{Co}(\text{TpivPP})(1\text{-EtIm})(\text{O}_2)]$  ( $P\bar{1}$ ) (100K) displaying the atom labeling scheme. Thermal ellipsoids of all atoms are contoured at the 50% probability level. Hydrogen atoms have been omitted for clarity.

Figure S6. A top view thermal ellipsoid diagram of  $[\text{Co}(\text{TpivPP})(1\text{-EtIm})(\text{O}_2)]$  (200K) displaying the atom labeling scheme. Thermal ellipsoids of all atoms are contoured at the 50% probability level. Hydrogen atoms have been omitted for clarity.

Figure S7. A edge-on thermal ellipsoid diagram of  $[\text{Co}(\text{TpivPP})(1\text{-EtIm})(\text{O}_2)]$  (200K) displaying the atom labeling scheme. Thermal ellipsoids of all atoms are contoured at the 50% probability level. Hydrogen atoms have been omitted for clarity.

Figure S8. A top view thermal ellipsoid diagram of  $[\text{Co}(\text{TpivPP})(1\text{-EtIm})(\text{O}_2)]$  (300K) displaying the atom labeling scheme. Thermal ellipsoids of all atoms are contoured at the 50% probability level. Hydrogen atoms have been omitted for clarity.

Figure S9. A edge-on thermal ellipsoid diagram of  $[\text{Co}(\text{TpivPP})(1\text{-EtIm})(\text{O}_2)]$  (300K) displaying the atom labeling scheme. Thermal ellipsoids of all atoms are contoured at the 50% probability level. Hydrogen atoms have been omitted for clarity.

Figure S10. A scheme showing the temperature-dependent structure determination of the second  $[\text{Co}(\text{TpivPP})(1\text{-EtIm})(\text{O}_2)]$  crystal. The annealing experiments are described. The temperatures, corresponding space groups, unit cell parameters, and observed R factors are given in highlighted boxes.

Figure S11. A edge-on thermal ellipsoid diagram of the second  $[\text{Co}(\text{TpivPP})(1\text{-EtIm})(\text{O}_2)]$  crystal structure at 80K displaying the atom labeling scheme. Thermal ellipsoids of all atoms are contoured at the 50% probability level. Hydrogen atoms have been omitted for clarity.

Figure S12. Formal diagram of the porphyrin cores of  $[\text{Co}(\text{TpivPP})(1\text{-EtIm})(\text{O}_2)]$  structure at 100, 200 and 300K. Averaged values of the chemically unique bond distances (in Å) and angles (in degrees) are shown. The numbers in parentheses are the esd's calculated on the assumption that the averaged values were all drawn from the same population. The perpendicular displacements (in units of 0.01 Å) of the porphyrin core atoms from the 24-atom mean plane are also displayed.

Figure S13. Packing diagrams of  $[\text{Co}(\text{TpivPP})(2\text{-MeHIm})]$  and the oxygen adduct  $[\text{Co}(\text{TpivPP})(2\text{-MeHIm})(\text{O}_2)]$ , showing the unit cell. Hydrogens omitted for clarity.

Figure S14. A edge-on thermal ellipsoid diagram of  $[\text{Co}(\text{TpivPP})(2\text{-MeHIm})(\text{O}_2)]$  (100K) displaying the atom labeling scheme. Thermal ellipsoids of all atoms are contoured at the 50% probability level. Hydrogen atoms have been omitted for clarity.

Figure S15. A top view thermal ellipsoid diagram of  $[\text{Co}(\text{TpivPP})(2\text{-MeHIm})(\text{O}_2)]$  (100K) displaying the atom labeling scheme. Thermal ellipsoids of all atoms are contoured at the 50% probability level. Hydrogen atoms have been omitted for clarity.

Figure S16. A edge-on thermal ellipsoid diagram of  $[\text{Co}(\text{TpivPP})(2\text{-MeHIm})0.4(\text{O}_2)]$  (100K) displaying the atom labeling scheme. Thermal ellipsoids of all atoms are contoured at the 50% probability level. Hydrogen atoms have been omitted for clarity.

Figure S17. A top view thermal ellipsoid diagram of  $[\text{Co}(\text{TpivPP})(2\text{-MeHIm})0.4(\text{O}_2)]$  (100K) displaying the atom labeling scheme. Thermal ellipsoids of all atoms are contoured at the 50% probability level. Hydrogen atoms have been omitted for clarity.

Figure S18. A edge-on thermal ellipsoid diagram of  $[\text{Co}(\text{TpivPP})(2\text{-MeHIm})0.3(\text{O}_2)]$  (300K) displaying the atom labeling scheme. Thermal ellipsoids of all atoms are contoured at the 50% probability level. Hydrogen atoms have been omitted for clarity.

Figure S19. A top view thermal ellipsoid diagram of  $[\text{Co}(\text{TpivPP})(2\text{-MeHIm})0.3(\text{O}_2)]$  (300K) displaying the atom labeling scheme. Thermal ellipsoids of all atoms are contoured at the 50% probability level. Hydrogen atoms have been omitted for clarity.

Figure S20. A edge-on thermal ellipsoid diagram of  $[\text{Co}(\text{TpivPP})(2\text{-MeHIm})]$  (100K) displaying the atom labeling scheme. Thermal ellipsoids of all atoms are contoured at the 50% probability level. Hydrogen atoms have been omitted for clarity.

Figure S21. A top view thermal ellipsoid diagram of  $[\text{Co}(\text{TpivPP})(2\text{-MeHIm})]$  (100K) displaying the atom labeling scheme. Thermal ellipsoids of all atoms are contoured

at the 50% probability level. Hydrogen atoms have been omitted for clarity.

Figure S22. Formal diagram of the porphyrin cores of [Co(TpivPP)(2-MeHIm)] and oxygen adducts structure. Averaged values of the chemically unique bond distances (in Å) and angles (in degrees) are shown. The numbers in parentheses are the esd's calculated on the assumption that the averaged values were all drawn from the same population. The perpendicular displacements (in units of 0.01 Å) of the porphyrin core atoms from the 24-atom mean plane are also displayed (positive to hindered porphyrin side).

## Supporting Information Table Captions

Table S1. Complete Crystallographic Details for  $[\text{Co}(\text{TpivPP})(1\text{-EtIm})(\text{O}_2)]\cdot\text{C}_6\text{H}_6$  (100K,  $P\bar{1}$ ).

Table S2. Atomic Coordinates and Equivalent Isotropic Displacement Parameters for  $[\text{Co}(\text{TpivPP})(1\text{-EtIm})(\text{O}_2)]\cdot\text{C}_6\text{H}_6$  (100K,  $P\bar{1}$ ).

Table S3. Bond Lengths for  $[\text{Co}(\text{TpivPP})(1\text{-EtIm})(\text{O}_2)]\cdot\text{C}_6\text{H}_6$  (100K,  $P\bar{1}$ ).

Table S4. Bond Angles for  $[\text{Co}(\text{TpivPP})(1\text{-EtIm})(\text{O}_2)]\cdot\text{C}_6\text{H}_6$  (100K,  $P\bar{1}$ ).

Table S5. Anisotropic Isotropic Displacement Parameters for  $[\text{Co}(\text{TpivPP})(1\text{-EtIm})(\text{O}_2)]\cdot\text{C}_6\text{H}_6$  (100K,  $P\bar{1}$ ).

Table S6. Hydrogen Coordinates and Isotropic Displacement Parameters for  $[\text{Co}(\text{TpivPP})(1\text{-EtIm})(\text{O}_2)]\cdot\text{C}_6\text{H}_6$  (100K,  $P\bar{1}$ ).

Table S7. Complete Crystallographic Details for  $[\text{Co}(\text{TpivPP})(1\text{-EtIm})(\text{O}_2)]\cdot\text{C}_6\text{H}_6$  (100K,  $\text{C}2/c$ ).

Table S8. Atomic Coordinates and Equivalent Isotropic Displacement Parameters for  $[\text{Co}(\text{TpivPP})(1\text{-EtIm})(\text{O}_2)]\cdot\text{C}_6\text{H}_6$  (100K,  $\text{C}2/c$ ).

Table S9. Bond Lengths for  $[\text{Co}(\text{TpivPP})(1\text{-EtIm})(\text{O}_2)]\cdot\text{C}_6\text{H}_6$  (100K,  $\text{C}2/c$ ).

Table S10. Bond Angles for  $[\text{Co}(\text{TpivPP})(1\text{-EtIm})(\text{O}_2)]\cdot\text{C}_6\text{H}_6$  (100K,  $\text{C}2/c$ ).

Table S11. Anisotropic Isotropic Displacement Parameters for  $[\text{Co}(\text{TpivPP})(1\text{-EtIm})(\text{O}_2)]\cdot\text{C}_6\text{H}_6$  (100K,  $\text{C}2/c$ ).

Table S12. Hydrogen Coordinates and Isotropic Displacement Parameters for [Co(TpivPP)(1-EtIm)(O<sub>2</sub>)]·C<sub>6</sub>H<sub>6</sub> (100K, C2/c).

Table S13. Complete Crystallographic Details for [Co(TpivPP)(1-EtIm)(O<sub>2</sub>)]·C<sub>6</sub>H<sub>6</sub> (200K).

Table S14. Atomic Coordinates and Equivalent Isotropic Displacement Parameters for [Co(TpivPP)(1-EtIm)(O<sub>2</sub>)]·C<sub>6</sub>H<sub>6</sub> (200K).

Table S15. Bond Lengths for [Co(TpivPP)(1-EtIm)(O<sub>2</sub>)]·C<sub>6</sub>H<sub>6</sub> (200K).

Table S16. Bond Angles for [Co(TpivPP)(1-EtIm)(O<sub>2</sub>)]·C<sub>6</sub>H<sub>6</sub> (200K).

Table S17. Anisotropic Isotropic Displacement Parameters for [Co(TpivPP)(1-EtIm)(O<sub>2</sub>)]·C<sub>6</sub>H<sub>6</sub> (200K).

Table S18. Hydrogen Coordinates and Isotropic Displacement Parameters for [Co(TpivPP)(1-EtIm)(O<sub>2</sub>)]·C<sub>6</sub>H<sub>6</sub> (200K).

Table S19. Complete Crystallographic Details for [Co(TpivPP)(1-EtIm)(O<sub>2</sub>)]·C<sub>6</sub>H<sub>6</sub> (300K).

Table S20. Atomic Coordinates and Equivalent Isotropic Displacement Parameters for [Co(TpivPP)(1-EtIm)(O<sub>2</sub>)]·C<sub>6</sub>H<sub>6</sub> (300K).

Table S21. Bond Lengths for [Co(TpivPP)(1-EtIm)(O<sub>2</sub>)]·C<sub>6</sub>H<sub>6</sub> (300K).

Table S22. Bond Angles for [Co(TpivPP)(1-EtIm)(O<sub>2</sub>)]·C<sub>6</sub>H<sub>6</sub> (300K).

Table S23. Anisotropic Isotropic Displacement Parameters for [Co(TpivPP)(1-EtIm)(O<sub>2</sub>)]·C<sub>6</sub>H<sub>6</sub> (300K).



Table S24. Hydrogen Coordinates and Isotropic Displacement Parameters for [Co(TpivPP)(1-EtIm)(O<sub>2</sub>)]·C<sub>6</sub>H<sub>6</sub> (300K).

Table S25. Complete Crystallographic Details for [Co(TpivPP)(2-MeHIm)(O<sub>2</sub>)]·1.8C<sub>2</sub>H<sub>5</sub>OH.

Table S26. Atomic Coordinates and Equivalent Isotropic Displacement Parameters for [Co(TpivPP)(2-MeHIm)(O<sub>2</sub>)]·1.8C<sub>2</sub>H<sub>5</sub>OH.

Table S27. Bond Lengths for [Co(TpivPP)(2-MeHIm)(O<sub>2</sub>)]·1.8C<sub>2</sub>H<sub>5</sub>OH.

Table S28. Bond Angles for [Co(TpivPP)(2-MeHIm)(O<sub>2</sub>)]·1.8C<sub>2</sub>H<sub>5</sub>OH.

Table S29. Anisotropic Isotropic Displacement Parameters for [Co(TpivPP)(2-MeHIm)(O<sub>2</sub>)]·1.8C<sub>2</sub>H<sub>5</sub>OH.

Table S30. Hydrogen Coordinates and Isotropic Displacement Parameters for [Co(TpivPP)(2-MeHIm)(O<sub>2</sub>)]·1.8C<sub>2</sub>H<sub>5</sub>OH.

Table S31. Complete Crystallographic Details for [Co(TpivPP)(2-MeHIm)0.4(O<sub>2</sub>)]·2C<sub>2</sub>H<sub>5</sub>OH.

Table S32. Atomic Coordinates and Equivalent Isotropic Displacement Parameters for [Co(TpivPP)(2-MeHIm)0.4(O<sub>2</sub>)]·2C<sub>2</sub>H<sub>5</sub>OH.

Table S33. Bond Lengths for [Co(TpivPP)(2-MeHIm)0.4(O<sub>2</sub>)]·2C<sub>2</sub>H<sub>5</sub>OH.

Table S34. Bond Angles for [Co(TpivPP)(2-MeHIm)0.4(O<sub>2</sub>)]·2C<sub>2</sub>H<sub>5</sub>OH.

Table S35. Anisotropic Isotropic Displacement Parameters for [Co(TpivPP)(2-MeHIm)0.4(O<sub>2</sub>)]·2C<sub>2</sub>H<sub>5</sub>OH.

Table S36. Hydrogen Coordinates and Isotropic Displacement Parameters for [Co(TpivPP)(2-MeHIm)0.4(O<sub>2</sub>)]·2C<sub>2</sub>H<sub>5</sub>OH.

Table S37. Complete Crystallographic Details for [Co(TpivPP)(2-MeHIm)0.3(O<sub>2</sub>)]·1.8C<sub>2</sub>H<sub>5</sub>OH.

Table S38. Atomic Coordinates and Equivalent Isotropic Displacement Parameters for [Co(TpivPP)(2-MeHIm)0.3(O<sub>2</sub>)]·1.8C<sub>2</sub>H<sub>5</sub>OH.

Table S39. Bond Lengths for [Co(TpivPP)(2-MeHIm)0.3(O<sub>2</sub>)]·1.8C<sub>2</sub>H<sub>5</sub>OH.

Table S40. Bond Angles for [Co(TpivPP)(2-MeHIm)0.3(O<sub>2</sub>)]·1.8C<sub>2</sub>H<sub>5</sub>OH.

Table S41. Anisotropic Isotropic Displacement Parameters for [Co(TpivPP)(2-MeHIm)0.3(O<sub>2</sub>)]·1.8C<sub>2</sub>H<sub>5</sub>OH.

Table S42. Hydrogen Coordinates and Isotropic Displacement Parameters for [Co(TpivPP)(2-MeHIm)0.3(O<sub>2</sub>)]·1.8C<sub>2</sub>H<sub>5</sub>OH.

Table S43. Complete Crystallographic Details for [Co(TpivPP)(2-MeHIm)]·1.8C<sub>2</sub>H<sub>5</sub>OH.

Table S44. Atomic Coordinates and Equivalent Isotropic Displacement Parameters for [Co(TpivPP)(2-MeHIm)]·1.8C<sub>2</sub>H<sub>5</sub>OH.

Table S45. Bond Lengths for [Co(TpivPP)(2-MeHIm)]·1.8C<sub>2</sub>H<sub>5</sub>OH.

Table S46. Bond Angles for [Co(TpivPP)(2-MeHIm)]·1.8C<sub>2</sub>H<sub>5</sub>OH.

Table S47. Anisotropic Isotropic Displacement Parameters for [Co(TpivPP)(2-MeHIm)]·1.8C<sub>2</sub>H<sub>5</sub>OH.

Table S48. Hydrogen Coordinates and Isotropic Displacement Parameters for [Co(TpivPP)(2-MeHIm)]·1.8C<sub>2</sub>H<sub>5</sub>OH.
